# Supplementary material for: Spatial Resolved Metabolomics via AFADESI-MSI Reveals Lipid Metabolic Alterations in Aging Lungs
Source: Research Square preprint supplement (doi:10.21203/rs.3.rs-7113832/v1), 2025-07-28
Supplement: Supplementary file 1 [file 0e955d4e8b72ffbc89bc7211.xlsx]

## Sheet: Sheet1
Table S5. Significant expressed metabolites of untargeted metabolomic analysis
ID	m/z	Retention time (min)	Ion mode	Metabolites	cid	HMDB	KEGG	Super Class	Class	Sub Class	Adducts	Formula	Mass Error (ppm)	m3-6	m24-5	VIP	Average(B)	Average(A)	log2FoldChange	FoldChange	Regulation	p-value	q-value	m24-1	m24-2	m24-3	m24-4	m24-6	m3-1	m3-2	m3-3	m3-4	m3-5
11.29_776.5478m/z	776.548	11.2883	neg	PE(15:1/20:0)	20182			Lipids and lipid-like molecules	Glycerophospholipids	Glycerophosphoethanolamines	M+FA-H	C40H78NO8P	4.28497	16.1219	22.9257	4.84917	22.831	8.70765	14.1233	17846.4	Up	2.91388e-05	0.000854668	22.9229	22.8704	22.9578	23.0155	22.3882	7.04205	7.04205	7.04205	7.04205	15.37
11.33_778.5619m/z	778.562	11.3298	neg	PC(9:0/23:0)	18569			Lipids and lipid-like molecules	Glycerophospholipids	Glycerophosphocholines	M+FA-H	C40H80NO8P	2.08561	7.04205	23.0217	4.82764	20.5018	7.04205	13.4598	11266.7	Up	6.48843e-08	9.66333e-06	19.5768	19.5137	19.6275	20.5323	23.2588	7.04205	7.04205	7.04205	7.04205	7.04205
11.20_844.5356m/z	844.536	11.203	neg	PC(16:1/TXB2)	239138	HMDB0286037		Lipids and lipid-like molecules	Fatty Acyls	Eicosanoids	M-H	C44H80NO12P	1.28645	7.04205	18.6282	4.49284	18.5664	7.04205	11.5244	2945.71	Up	3.76755e-13	3.75719e-10	18.743	18.6467	18.7078	18.7015	18.0333	7.04205	7.04205	7.04205	7.04205	7.04205
10.57_851.5669m/z	851.567	10.5678	neg	PC(DiMe(9,5)/MonoMe(9,5))	83044	HMDB0061434		Lipids and lipid-like molecules	Glycerophospholipids	Glycerophosphocholines	M-H	C47H83NO10P+	-1.48204	14.7749	17.152	4.28272	17.5244	7.04205	10.4824	1430.57	Up	3.35096e-11	2.22783e-08	17.8368	17.8361	17.748	17.4959	16.7052	7.04205	7.04205	7.04205	7.04205	7.04205
13.73_848.4785m/z	848.478	13.7277	neg	Tacrolimus	28237		C01375	Phenylpropanoids and polyketides	Macrolide lactams	Unclassified	M+FA-H	C44H69NO12	-2.09952	11.1514	17.3606	4.20619	17.5875	7.41399	10.1735	1154.87	Up	2.50284e-08	4.15992e-06	17.6536	18.0183	18.0376	17.8084	16.4196	7.04205	7.04205	7.04205	7.04205	8.90174
11.83_850.5635m/z	850.563	11.8343	neg	PC(20:3/18:3)	19457	HMDB0008371	C00157	Lipids and lipid-like molecules	Glycerophospholipids	Glycerophosphocholines	M+FA-H	C46H80NO8P	3.86086	21.0882	20.5721	4.14178	20.9748	10.1745	10.8003	1783.25	Up	0.00027886	0.00378358	21.1711	21.0467	21.0777	21.1189	20.4594	7.04205	7.04205	9.84896	10.2903	16.649
12.64_806.5683m/z	806.568	12.6398	pos	PC(14:1/22:2)	18665	HMDB0007921	C00157	Lipids and lipid-like molecules	Glycerophospholipids	Glycerophosphocholines	M+Na	C44H82NO8P	1.59645	18.8996	22.8812	4.05772	22.6408	12.7617	9.87909	941.678	Up	2.09876e-05	0.000709486	22.6581	22.7747	22.4807	22.5386	22.7518	12.0269	10.8138	10.2045	15.0208	15.7425
10.87_852.5764m/z	852.576	10.8705	neg	PC(P-18:1/20:4-OH)	242841	HMDB0289741		Lipids and lipid-like molecules	Glycerophospholipids	Glycerophosphocholines	M+FA-H	C46H82NO8P	0.458042	11.8706	16.3322	3.99565	16.1557	7.04205	9.11369	553.979	Up	2.05058e-13	2.72659e-10	15.8657	15.9974	16.3445	16.1993	16.3718	7.04205	7.04205	7.04205	7.04205	7.04205
11.88_912.5232m/z	912.523	11.876	neg	PS(18:0/22:6-2OH(7S, 17S))	234488	HMDB0281386		Lipids and lipid-like molecules	Glycerophospholipids	Glycerophosphoserines	M+FA-H	C46H78NO12P	-1.30571	7.04205	15.8888	3.91532	15.8052	7.04205	8.76319	434.492	Up	6.34556e-11	3.61606e-08	16.0435	15.9426	16.0028	16.005	15.0323	7.04205	7.04205	7.04205	7.04205	7.04205
12.66_828.5505m/z	828.551	12.6583	pos	PS(P-16:0/21:0)	22362			Lipids and lipid-like molecules	Glycerophospholipids	Glycerophosphoserines	M+K	C43H84NO9P	-1.29531	14.0151	16.7794	3.90386	16.8682	7.96717	8.90105	478.06	Up	1.00899e-06	0.000103201	17.4028	17.4523	16.4967	16.6034	16.3859	7.04205	7.04205	7.04205	8.47441	10.2353
11.31_742.5418m/z	742.542	11.309	neg	PE(18:1-O/P-18:0)	238435	HMDB0285333		Lipids and lipid-like molecules	Glycerophospholipids	Glycerophosphoethanolamines	M-H	C41H78NO8P	3.48358	7.04205	18.0279	3.88471	16.0121	7.04205	8.97	501.465	Up	1.165e-05	0.000510678	13.1895	14.6256	16.3532	17.8133	18.0786	7.04205	7.04205	7.04205	7.04205	7.04205
11.86_873.5530n	918.551	11.8552	neg	PE(22:6-OH/DiMe)	237933	HMDB0284831		Lipids and lipid-like molecules	Glycerophospholipids	Glycerophosphoethanolamines	M-H, M+FA-H	C49H80NO10P	1.18288	16.0527	15.1484	3.86505	15.5771	7.04205	8.53503	370.938	Up	6.41358e-12	5.11676e-09	15.3079	15.2389	15.5813	15.7503	16.0069	7.04205	7.04205	7.04205	7.04205	7.04205
10.41_844.5353m/z	844.535	10.4078	neg	PS(17:2/20:1)	21558			Lipids and lipid-like molecules	Glycerophospholipids	Glycerophosphoserines	M+FA-H	C43H78NO10P	0.927167	7.04205	15.6528	3.85209	15.5121	7.04205	8.47004	354.597	Up	8.08061e-14	1.61168e-10	15.5384	15.3465	15.6812	15.6911	15.3033	7.04205	7.04205	7.04205	7.04205	7.04205
11.83_894.5509m/z	894.551	11.8343	neg	PS(19:0/22:6)	21740			Lipids and lipid-like molecules	Glycerophospholipids	Glycerophosphoserines	M+FA-H	C47H80NO10P	0.784181	11.2878	15.5894	3.75466	15.379	7.2903	8.08866	272.226	Up	8.75702e-09	1.71406e-06	15.4665	15.1638	15.7592	15.8658	14.6396	7.04205	8.28333	7.04205	7.04205	7.04205
12.64_830.5673m/z	830.567	12.6398	pos	PC(20:4/18:1)	19467	HMDB0008465	C00157	Lipids and lipid-like molecules	Glycerophospholipids	Glycerophosphocholines	M+Na	C46H82NO8P	0.3423	18.2195	19.1589	3.73827	19.0513	9.60187	9.44946	699.151	Up	0.00236006	0.0153072	18.8663	19.2078	19.0076	19.0588	19.1161	8.74957	7.04205	7.04205	7.04205	18.1336
11.04_716.5258m/z	716.526	11.0355	neg	PE(22:1/12:0)	20729			Lipids and lipid-like molecules	Glycerophospholipids	Glycerophosphoethanolamines	M-H	C39H76NO8P	3.14634	13.8379	17.902	3.73603	17.2948	8.96419	8.33063	321.936	Up	1.06979e-05	0.000490505	15.9948	17.1704	17.7106	17.6864	17.9119	7.04205	7.04205	10.229	10.111	10.3969
11.71_834.5685m/z	834.568	11.7082	neg	PE(20:4-2OH(5S,6R)/22:1)	236995	HMDB0283893		Lipids and lipid-like molecules	Glycerophospholipids	Glycerophosphoethanolamines	M-H2O-H	C47H84NO10P	3.55042	7.04205	15.3781	3.71779	15.4573	7.47449	7.98277	252.96	Up	1.31121e-07	1.86801e-05	15.3287	15.4026	15.817	15.8102	14.9278	7.04205	7.04205	7.04205	7.04205	9.20424
12.49_870.5511m/z	870.551	12.4866	neg	PS(20:3-2OH/20:1)	235294	HMDB0282192		Lipids and lipid-like molecules	Glycerophospholipids	Glycerophosphoserines	M-H	C46H82NO12P	0.991211	7.04205	15.0092	3.70323	14.8851	7.04205	7.8431	229.619	Up	1.77731e-10	8.86212e-08	14.138	14.9326	14.9543	15.1109	15.2899	7.04205	7.04205	7.04205	7.04205	7.04205
9.51_449.3484m/z	449.348	9.50647	pos	Oleoylcarnitine	48475	HMDB0005065		Lipids and lipid-like molecules	Fatty Acyls	Fatty acid esters	M+Na	C25H48NO4+	1.94977	14.5613	7.04205	3.7027	7.04205	14.9017	-7.85962	0.00430544	Down	1.29368e-09	3.9191e-07	7.04205	7.04205	7.04205	7.04205	7.04205	14.5203	15.2474	14.0954	15.2202	15.4251
12.66_802.5352m/z	802.535	12.6583	pos	PS(O-18:0/17:0)	22270			Lipids and lipid-like molecules	Glycerophospholipids	Glycerophosphoserines	M+K	C41H82NO9P	-0.932712	15.1761	15.6962	3.68656	15.4985	7.56068	7.93786	245.208	Up	6.62494e-07	8.00815e-05	15.8026	16.1379	15.3265	15.4559	14.7698	7.04205	7.04205	7.04205	9.6352	7.04205
11.33_894.5508m/z	894.551	11.3298	neg	PE(PGJ2/22:2)	237057	HMDB0283955		Lipids and lipid-like molecules	Fatty Acyls	Eicosanoids	M+FA-H	C47H80NO10P	0.667892	7.04205	14.8895	3.63031	14.6051	7.04205	7.56303	189.103	Up	4.58875e-09	1.18792e-06	15.1465	14.6875	14.7086	14.9726	13.5102	7.04205	7.04205	7.04205	7.04205	7.04205
11.04_854.5935m/z	854.593	11.0355	neg	PS(22:2/19:1)	22035			Lipids and lipid-like molecules	Glycerophospholipids	Glycerophosphoserines	M-H	C47H86NO10P	2.09773	7.04205	17.0171	3.55467	15.4838	7.90783	7.57598	190.808	Up	2.13977e-05	0.000711296	14.0841	14.6134	14.9494	15.8644	17.9077	7.04205	9.42331	8.98967	7.04205	7.04205
11.54_826.5634m/z	826.563	11.542	neg	PC(20:4-OH(18R)/P-16:0)	242536	HMDB0289436		Lipids and lipid-like molecules	Glycerophospholipids	Glycerophosphocholines	M+FA-H	C44H80NO8P	3.93011	18.8403	21.4197	3.53155	21.2751	14.0204	7.25466	152.711	Up	8.03776e-07	8.66558e-05	21.319	21.2602	21.4167	21.5584	20.8212	14.2196	13.3864	12.7259	13.9531	15.8171
12.95_802.5350m/z	802.535	12.9475	pos	PS(O-20:0/15:0)	22291			Lipids and lipid-like molecules	Glycerophospholipids	Glycerophosphoserines	M+K	C41H82NO9P	-1.13415	14.9916	15.4919	3.52128	15.35	7.89863	7.45134	175.015	Up	2.99423e-05	0.000864563	15.8106	15.7834	15.3245	15.2152	14.6162	7.04205	7.04205	7.04205	7.04205	11.325
10.75_844.5358m/z	844.536	10.7462	neg	PE(18:1-2OH/20:3)	215391	HMDB0262289		Lipids and lipid-like molecules	Glycerophospholipids	Glycerophosphoethanolamines	M+FA-H	C43H78NO10P	1.61766	7.04205	15.8728	3.52021	15.7503	8.49247	7.25785	153.049	Up	2.14387e-06	0.000167684	15.7759	15.6311	15.974	15.8367	15.5339	9.11648	9.69453	7.04205	9.56727	7.04205
14.34_648.6284m/z	648.628	14.336	pos	Cer(d18:1/24:1)	39032	HMDB0004953	C00195	Lipids and lipid-like molecules	Sphingolipids	Ceramides	M+H	C42H81NO3	-0.786524	10.4196	17	3.51516	15.5267	7.61154	7.91512	241.373	Up	0.000636957	0.00665386	10.1509	16.5501	16.8276	17.0423	17.0624	7.04205	7.04205	7.04205	7.04205	9.88952
13.22_828.5506m/z	828.551	13.2194	pos	PS(O-18:0/19:1)	22279			Lipids and lipid-like molecules	Glycerophospholipids	Glycerophosphoserines	M+K	C43H84NO9P	-1.12555	16.9922	19.076	3.51414	19.055	11.0719	7.98318	253.033	Up	0.000672847	0.00684356	19.4794	19.3508	18.8286	18.8115	18.8049	9.64158	8.3266	8.4352	13.0479	15.908
9.51_414.2151m/z	414.215	9.50647	pos	FK-866	267463			Benzenoids	Benzene and substituted derivatives	Benzoyl derivatives	M+Na	C24H29N3O2	-0.176918	13.3585	7.04205	3.51013	7.04205	14.1267	-7.08464	0.00736734	Down	9.02364e-09	1.71406e-06	7.04205	7.04205	7.04205	7.04205	7.04205	13.8961	14.6024	13.0748	14.51	14.55
11.04_751.5447m/z	751.545	11.0362	pos	PG(20:0/14:0)	23343			Lipids and lipid-like molecules	Glycerophospholipids	Glycerophosphoglycerols	M+H	C40H79O10P	-4.8925	13.8492	14.3146	3.48754	13.9857	7.04205	6.94368	123.1	Up	3.0868e-14	1.23132e-10	13.888	13.8638	13.9211	14.149	14.1068	7.04205	7.04205	7.04205	7.04205	7.04205
12.31_828.5506m/z	828.551	12.3102	pos	PC(P-16:0/22:6-OH)	242601	HMDB0289501		Lipids and lipid-like molecules	Glycerophospholipids	Glycerophosphocholines	M+Na	C46H80NO8P	-0.941468	14.6033	18.7308	3.44648	18.4069	11.4545	6.95248	123.853	Up	3.48563e-06	0.000220701	18.5228	18.6003	18.1998	18.2838	18.428	12.3921	12.3756	11.0278	9.22424	12.2526
13.24_802.5348m/z	802.535	13.2402	pos	PS(O-16:0/19:0)	22322			Lipids and lipid-like molecules	Glycerophospholipids	Glycerophosphoserines	M+K	C41H82NO9P	-1.42806	16.6192	16.7717	3.43567	16.7632	9.15427	7.60896	195.221	Up	0.000618237	0.0065242	17.243	17.2643	16.823	16.5125	15.9734	7.04205	7.04205	7.04205	10.8161	13.8291
5.32_298.0854m/z	298.085	5.32403	pos	Supidimide	212113	HMDB0258631		Organic acids and derivatives	Carboxylic acids and derivatives	Amino acids, peptides, and analogues	M+NH4	C12H12N2O4S	-0.841755	14.2607	7.04205	3.42603	7.04205	13.7893	-6.74729	0.00930812	Down	4.76479e-09	1.18792e-06	7.04205	7.04205	7.04205	7.04205	7.04205	13.9	14.1499	12.801	13.8628	14.2331
12.77_714.5106m/z	714.511	12.7666	neg	PE(14:0/20:2)	20105	HMDB0008835	C00350	Lipids and lipid-like molecules	Glycerophospholipids	Glycerophosphoethanolamines	M-H	C39H74NO8P	3.79561	17.0365	16.101	3.40737	17.0162	8.99386	8.02234	259.996	Up	0.00348534	0.0200044	16.8217	16.9681	17.2934	17.5624	16.4353	7.04205	7.04205	7.04205	7.04205	16.8011
11.26_752.5232m/z	752.523	11.2642	pos	PC(14:1/20:4)	49571	HMDB0007917	C00157	Lipids and lipid-like molecules	Glycerophospholipids	Glycerophosphocholines	M+H	C42H74NO8P	1.00257	16.1097	16.2921	3.39375	16.091	8.72608	7.36494	164.842	Up	0.000517005	0.00577684	16.1313	16.1771	15.756	16.1855	16.2051	7.04205	7.04205	7.04205	8.67141	13.8328
12.31_802.5349m/z	802.535	12.3102	pos	PC(20:4/16:1)	19466	HMDB0008463	C00157	Lipids and lipid-like molecules	Glycerophospholipids	Glycerophosphocholines	M+Na	C44H78NO8P	-1.10844	15.268	15.8732	3.39087	15.3293	8.16491	7.16434	143.443	Up	0.000220423	0.00318575	15.3961	15.5175	15.5318	15.2589	14.9421	7.04205	7.04205	7.04205	7.04205	12.6564
10.49_409.2734m/z	409.273	10.4894	neg	15,20-dihydroxycholest-4,14-dien-3,16-dione	43640			Lipids and lipid-like molecules	Steroids and steroid derivatives	Cholestane steroids	M-H2O-H	C27H40O4	-3.2526	11.999	13.7575	3.34133	13.439	7.04205	6.397	84.2732	Up	4.41923e-10	1.76283e-07	13.8089	12.8995	13.2207	13.4079	13.8583	7.04205	7.04205	7.04205	7.04205	7.04205
11.29_825.5554n	824.548	11.2883	neg	PE(PGJ2/20:0)	214953	HMDB0261851		Lipids and lipid-like molecules	Fatty Acyls	Eicosanoids	M-H, M+FA-H	C45H80NO10P	4.18671	19.3589	19.2463	3.33073	19.2856	10.9534	8.33217	322.28	Up	0.010255	0.0415301	19.038	19.4525	19.5426	19.2011	19.1935	7.04205	7.04205	7.04205	14.6212	19.0196
10.95_714.5108m/z	714.511	10.9517	neg	PE(22:2/12:0)	20760			Lipids and lipid-like molecules	Glycerophospholipids	Glycerophosphoethanolamines	M-H	C39H74NO8P	3.95157	18.616	17.4494	3.31802	17.7148	10.6367	7.07806	135.116	Up	0.000686969	0.00689435	18.2493	18.0297	17.8754	17.7845	16.6351	9.80377	9.3967	9.32709	8.88026	15.7759
11.81_744.5528m/z	744.553	11.811	pos	PE(16:0/20:2)	20199	HMDB0008934	C00350	Lipids and lipid-like molecules	Glycerophospholipids	Glycerophosphoethanolamines	M+H	C41H78NO8P	-1.36715	9.08944	16.7707	3.31374	16.0917	9.70134	6.39041	83.8889	Up	1.1517e-06	0.000114853	14.7922	15.7152	16.2752	16.5954	17.0808	10.2232	10.5189	9.0147	9.15148	9.59846
10.79_343.2855m/z	343.285	10.7896	pos	1,2-Ethanediol monoricinoleate	206597	HMDB0252073		Lipids and lipid-like molecules	Fatty Acyls	Fatty alcohols	M+H	C20H38O4	3.45382	14.0564	14.2361	3.30374	13.9596	7.56447	6.39514	84.1645	Up	2.53257e-06	0.000187082	13.8666	14.3022	14.2783	13.884	13.467	7.04205	7.04205	7.04205	7.04205	9.65415
10.79_744.5528m/z	744.553	10.7896	pos	PA(20:3/18:0)	135007	HMDB0115123		Lipids and lipid-like molecules	Glycerophospholipids	Glycerophosphates	M+NH4	C41H75O8P	-1.28396	7.04205	14.678	3.29942	13.5342	7.04205	6.49213	90.0174	Up	1.68943e-05	0.000623995	10.9381	13.156	14.083	14.6384	14.8554	7.04205	7.04205	7.04205	7.04205	7.04205
10.73_409.2733m/z	409.273	10.7254	neg	Bufospirostenin A	44548			Organic oxygen compounds	Organooxygen compounds	Ethers	M-H2O-H	C27H40O4	-3.43835	12.5038	13.4329	3.2981	13.2719	7.04205	6.22983	75.0528	Up	2.75587e-10	1.22146e-07	13.4556	12.8292	12.9134	13.5623	13.5989	7.04205	7.04205	7.04205	7.04205	7.04205
12.75_742.5421m/z	742.542	12.7474	neg	PE(22:1/14:1)	20732			Lipids and lipid-like molecules	Glycerophospholipids	Glycerophosphoethanolamines	M-H	C41H78NO8P	3.85212	7.04205	16.6281	3.27423	13.9716	7.04205	6.92952	121.897	Up	0.000763334	0.00735493	10.1874	11.5242	15.069	16.5218	16.5554	7.04205	7.04205	7.04205	7.04205	7.04205
9.51_750.5039n	773.493	9.50647	pos	1,26-Hexacosanediol diferulate	55500	HMDB0030751		Phenylpropanoids and polyketides	Cinnamic acids and derivatives	Hydroxycinnamic acids and derivatives	M+NH4, M+Na, M+H	C46H70O8	-4.17153	14.9343	10.9557	3.24863	10.3441	16.7371	-6.39295	0.0118996	Down	3.97657e-05	0.00100815	8.45087	10.8335	10.2077	10.7593	11.4692	15.8866	17.792	14.7902	17.511	17.7056
5.15_297.0984m/z	297.098	5.15443	neg	2-Phenylethanol glucuronide	50914	HMDB0010350	C03033	Organic oxygen compounds	Organooxygen compounds	Carbohydrates and carbohydrate conjugates	M-H	C14H18O7	1.47996	9.37387	13.0054	3.24578	14.1655	7.91907	6.24646	75.9229	Up	1.45229e-05	0.000579318	14.2904	13.9833	14.8732	14.8474	12.8334	9.71404	8.75517	7.04205	7.04205	7.04205
4.70_281.0832n	282.09	4.70432	pos	albendazole S-oxide	81714	HMDB0059609	C02809	Organoheterocyclic compounds	Benzimidazoles	Unclassified	M+H, M+Na	C12H15N3O3S	-0.835998	14.8643	7.04205	3.24287	7.04205	13.1635	-6.12145	0.0143635	Down	2.77087e-07	3.68433e-05	7.04205	7.04205	7.04205	7.04205	7.04205	13.8993	13.6972	11.8143	12.7508	13.6559
12.64_776.5569m/z	776.557	12.6398	pos	PE(18:0/22:5)	49989	HMDB0009010	C00350	Lipids and lipid-like molecules	Glycerophospholipids	Glycerophosphoethanolamines	M+H-H2O	C45H80NO8P	-2.46558	16.6474	18.6319	3.20628	18.1971	11.9933	6.20387	73.714	Up	4.34583e-05	0.00107009	17.3904	18.4814	18.289	18.2203	18.6045	13.6195	10.0153	10.6618	12.011	13.6589
11.44_878.5954m/z	878.595	11.4357	neg	PE(24:1/PGJ2)	237680	HMDB0284578		Lipids and lipid-like molecules	Fatty Acyls	Eicosanoids	M-H	C49H86NO10P	4.25672	7.04205	17.6853	3.20036	13.9368	7.04205	6.89471	118.991	Up	0.00200586	0.0136543	9.45913	11.9595	13.6222	17.2544	17.3886	7.04205	7.04205	7.04205	7.04205	7.04205
12.64_724.5267m/z	724.527	12.6398	pos	PnE(16:0/18:1)	27818			Lipids and lipid-like molecules	Glycerophosphonolipids	Glycerophosphonoethanolamines	M+Na	C39H76NO7P	2.24577	19.617	18.688	3.17971	18.5714	10.9303	7.64105	199.612	Up	0.011173	0.0439539	19.0664	19.0479	18.6615	18.4946	17.5865	7.04205	7.04205	9.15821	11.9591	19.4502
12.10_802.5347m/z	802.535	12.1013	pos	PC(20:5/16:0)	19191	HMDB0008495	C00157	Lipids and lipid-like molecules	Glycerophospholipids	Glycerophosphocholines	M+Na	C44H78NO8P	-1.30742	14.2077	15.1975	3.17758	14.251	8.12138	6.12961	70.0156	Up	6.4791e-05	0.00138265	13.9374	14.1086	14.3479	14.6588	14.2021	7.04205	8.31283	7.04205	7.04205	11.1679
12.64_768.5526m/z	768.553	12.6398	pos	PE(20:0/16:1)	20516	HMDB0009221	C00350	Lipids and lipid-like molecules	Glycerophospholipids	Glycerophosphoethanolamines	M+Na	C41H80NO8P	1.57874	15.166	18.7353	3.15842	18.4665	12.5117	5.95486	62.0286	Up	1.32993e-05	0.000549023	18.1895	18.6902	18.3871	18.2785	18.7873	11.6089	11.6295	11.2923	13.7503	14.2772
12.64_731.5448n	732.552	12.6398	pos	PC(18:0/14:1)	18841	HMDB0008032	C00157	Lipids and lipid-like molecules	Glycerophospholipids	Glycerophosphocholines	M+H, M+Na	C40H78NO8P	-2.32227	18.387	23.85	3.15811	22.3071	15.7657	6.54148	93.1499	Up	0.00111821	0.00945027	17.9346	23.0579	23.3763	23.3456	23.8213	14.5136	14.7577	14.5311	17.0178	18.0081
12.64_809.5861n	809.586	12.6398	pos	PC(20:0/18:4)	19055	HMDB0008273	C00157	Lipids and lipid-like molecules	Glycerophospholipids	Glycerophosphocholines	M+H-H2O, M+	C46H84NO8P	-9.03846	13.7225	19.8124	3.15777	18.5142	12.5813	5.93293	61.0927	Up	1.80566e-05	0.000648643	17.0675	17.6296	18.7851	19.1698	19.9192	13.8296	12.9024	11.6992	11.6893	12.786
11.01_774.5378m/z	774.538	11.0138	neg	PE-NMe2(18:1/20:4)	134130	HMDB0114027		Lipids and lipid-like molecules	Glycerophospholipids	Glycerophosphoethanolamines	M-H2O-H	C45H80NO8P	-8.24088	19.7713	19.1894	3.15611	19.1591	11.2717	7.8875	236.796	Up	0.0176073	0.0608626	19.1265	18.9096	19.182	19.21	19.3676	7.04205	7.04205	7.04205	15.9051	19.327
15.45_707.5973m/z	707.597	15.4481	neg	DG(22:5/22:0/0:0)	49463	HMDB0007753		Lipids and lipid-like molecules	Glycerolipids	Diradylglycerols	M-H2O-H	C47H82O5	-1.4889	15.3703	16.2167	3.14448	15.618	8.7375	6.88045	117.821	Up	0.00396753	0.0217996	15.4467	15.9403	16.0419	16.137	14.5238	7.04205	7.04205	7.04205	7.04205	15.5193
14.36_646.6130m/z	646.613	14.3567	pos	Cer(d18:1/24:2)	197288	HMDB0240679		Organic oxygen compounds	Organooxygen compounds	Alcohols and polyols	M+H	C42H79NO3	-0.478904	15.648	16.4497	3.1379	15.5978	8.74049	6.85735	115.949	Up	0.00402176	0.0219764	15.2948	15.919	15.9501	16.1473	14.6781	7.04205	7.04205	7.04205	7.04205	15.5343
13.24_754.5353m/z	754.535	13.2402	pos	PA(20:5/19:0)	25562			Lipids and lipid-like molecules	Glycerophospholipids	Glycerophosphates	M+NH4	C42H73O8P	-3.7955	16.6724	21.3594	3.13543	20.1027	13.8973	6.20541	73.793	Up	0.000303336	0.00404685	17.4655	20.5234	20.5793	20.6553	21.29	12.6201	12.0396	13.4111	15.5707	15.8452
6.04_201.0224m/z	201.022	6.03722	neg	3-ethylphenyl Sulfate	83746	HMDB0062721		Organic acids and derivatives	Organic sulfuric acids and derivatives	Arylsulfates	M-H	C8H10O4S	-1.41712	9.58589	15.0179	3.11503	15.7802	10.1885	5.59166	48.2233	Up	6.54074e-08	9.66333e-06	15.7851	15.8391	15.9441	16.321	15.0116	10.3413	10.2895	9.37755	10.5104	10.4238
15.41_690.6068m/z	690.607	15.4069	neg	Cer(d18:2/24:1)	197289	HMDB0240680		Organic oxygen compounds	Organooxygen compounds	Alcohols and polyols	M+FA-H	C42H79NO3	4.08836	14.9584	16.0049	3.09618	15.3201	8.66829	6.65178	100.551	Up	0.00378279	0.0210748	15.12	15.5747	15.7814	15.8093	14.315	7.04205	7.04205	7.04205	7.04205	15.1733
10.81_776.5576m/z	776.558	10.8102	pos	PG(18:0/18:1)	51094	HMDB0010603		Lipids and lipid-like molecules	Glycerophospholipids	Glycerophosphoglycerols	M+	C42H81O10P	1.16226	10.9942	15.1314	3.09126	14.8798	8.90347	5.97636	62.96	Up	0.000182055	0.0028148	13.4818	15.2055	15.1526	15.2021	15.357	7.04205	7.04205	8.86601	11.1573	10.41
10.99_407.2579m/z	407.258	10.9931	neg	(23R)-1alpha-Hydroxy-25,27-didehydrovitamin D3 26,23-lactone	198942	HMDB0242503		Lipids and lipid-like molecules	Steroids and steroid derivatives	Vitamin D and derivatives	M-H2O-H	C27H38O4	-3.01488	16.1384	15.5748	3.09016	15.496	8.77594	6.72011	105.427	Up	0.00472597	0.0243874	15.3095	15.5923	15.7068	15.5108	15.3608	7.04205	7.04205	7.04205	7.04205	15.7115
13.24_752.5199m/z	752.52	13.2402	pos	PE-NMe2(15:0/18:2)	134023	HMDB0113920		Lipids and lipid-like molecules	Glycerophospholipids	Glycerophosphoethanolamines	M+Na	C40H76NO8P	-0.281735	16.3816	16.9069	3.08824	16.7991	10.5056	6.29355	78.4419	Up	0.00120357	0.00989905	16.8983	17.0109	16.683	16.5992	16.8042	8.27381	8.6712	10.006	10.147	15.4299
13.26_762.5179n	780.552	13.2607	pos	PA(19:0/22:6)	25376			Lipids and lipid-like molecules	Glycerophospholipids	Glycerophosphates	M+, M+NH4	C44H75O8P	-2.68557	18.9045	20.8573	3.08285	19.9321	14.0136	5.91844	60.4824	Up	0.000173543	0.00273622	19.3572	19.3877	19.9167	20.4719	20.5269	12.4582	12.6709	12.897	15.1855	16.8565
13.22_744.5529m/z	744.553	13.2194	pos	PE(18:0(11Cp)/16:0(9Cp))	20959			Lipids and lipid-like molecules	Glycerophospholipids	Glycerophosphoethanolamines	M+H	C41H78NO8P	-1.25092	11.2159	18.3259	3.07525	17.3481	11.7622	5.58594	48.0326	Up	8.66416e-06	0.000426683	15.8249	16.966	17.5004	17.8317	18.6177	12.4274	11.8443	11.2892	10.8411	12.409
12.64_780.5523m/z	780.552	12.6398	pos	PC(P-16:0/18:1-O(9S,10R))	242581	HMDB0289481		Lipids and lipid-like molecules	Glycerophospholipids	Glycerophosphocholines	M+Na	C42H80NO8P	1.19359	20.5333	21.4726	3.06112	20.6495	14.8966	5.75288	53.9248	Up	0.000108054	0.00191567	20.3522	20.3876	20.4126	20.985	21.1099	14.7897	13.7722	13.0954	15.0538	17.7718
11.22_718.5371m/z	718.537	11.223	pos	1,2-dioleoyl-sn-Glycero-3-Phosphate	266261			Lipids and lipid-like molecules	Glycerophospholipids	Glycerophosphates	M+NH4	C39H73O8P	-1.48124	12.3297	16.3023	3.04512	15.9066	9.49633	6.41028	85.0522	Up	0.00293141	0.0177441	15.0326	16.0498	16.0602	16.0134	16.377	7.04205	7.04205	7.04205	13.2708	13.0847
5.15_365.0861m/z	365.086	5.15443	neg	5-(3',4'-Dihydroxyphenyl)-gamma-valerolactone-4'-O-glucuronide	82006	HMDB0059989		Organic oxygen compounds	Organooxygen compounds	Carbohydrates and carbohydrate conjugates	M-H2O-H	C17H20O10	-4.4095	7.04205	11.117	3.03846	12.413	7.04205	5.37092	41.3817	Up	7.58189e-07	8.40115e-05	12.5214	12.278	13.1341	13.1296	11.0018	7.04205	7.04205	7.04205	7.04205	7.04205
10.18_409.2734m/z	409.273	10.1827	neg	1,25-Dihydroxy-16-ene-23-yne-vitamin D3	210992	HMDB0257271		Lipids and lipid-like molecules	Steroids and steroid derivatives	Vitamin D and derivatives	M-H	C27H38O3	-3.47713	12.6426	14.6329	3.03773	14.4754	9.17545	5.29999	39.3962	Up	9.85087e-09	1.78614e-06	14.4261	14.1613	14.4445	14.6177	14.7275	9.46428	8.80478	9.57758	8.59108	9.43954
10.51_739.5179n	738.511	10.51	neg	PE(P-18:1/18:3-OH)	238668	HMDB0285566		Lipids and lipid-like molecules	Glycerophospholipids	Glycerophosphoethanolamines	M-H2O-H, M-H	C41H74NO8P	3.69662	16.6636	15.0541	3.0246	16.535	9.88768	6.64728	100.237	Up	0.00668777	0.0307955	17.2844	16.9869	16.6379	16.1699	15.5958	7.04205	7.04205	7.04205	12.6474	15.6649
4.30_338.0889m/z	338.089	4.29833	neg	2-Methoxyacetaminophen glucuronide	196983	HMDB0240215		Organic oxygen compounds	Organooxygen compounds	Carbohydrates and carbohydrate conjugates	M-H2O-H	C15H19NO9	2.09912	7.04205	9.00654	3.0135	12.276	7.04205	5.23394	37.6333	Up	2.70696e-08	4.31922e-06	12.6622	12.049	11.6602	13.0289	11.9797	7.04205	7.04205	7.04205	7.04205	7.04205
4.31_312.0665m/z	312.067	4.31353	neg	Sulfisoxazole	52657	HMDB0014408	C07318	Benzenoids	Benzene and substituted derivatives	Benzenesulfonamides	M+FA-H	C11H13N3O3S	2.02067	12.2812	7.04205	3.01311	7.04205	12.2636	-5.22159	0.0268006	Down	6.0666e-09	1.42351e-06	7.04205	7.04205	7.04205	7.04205	7.04205	12.773	12.1264	11.5825	12.2581	12.5782
11.37_706.5891m/z	706.589	11.3687	pos	SM(d18:1/15:0)	39618	HMDB0240608		Lipids and lipid-like molecules	Sphingolipids	Phosphosphingolipids	M+NH4	C38H77N2O6P	4.79819	12.0974	13.5805	2.99559	13.2247	7.75675	5.46799	44.2618	Up	6.99356e-05	0.00143463	13.4016	12.8571	12.9558	13.2322	13.6769	7.04205	7.04205	7.04205	7.04205	10.6155
13.22_767.5451n	750.542	13.2194	pos	PE(P-18:1/20:3-OH)	238678	HMDB0285576		Lipids and lipid-like molecules	Glycerophospholipids	Glycerophosphoethanolamines	M+H-H2O, M+H	C43H78NO8P	-1.87759	19.1541	20.5896	2.96707	20.1457	14.4265	5.7192	52.6806	Up	0.000785089	0.0074758	20.0093	20.2	20.0092	20.238	20.2723	13.1563	12.6781	12.4292	15.8082	18.0609
3.93_240.0800m/z	240.08	3.92597	pos	Albendazole-2-aminosulfone	202705	HMDB0247482	C16627	Organoheterocyclic compounds	Benzimidazoles	Unclassified	M+H	C10H13N3O2S	-0.470481	11.1757	7.04205	2.95724	7.04205	12.0546	-5.01253	0.0309797	Down	1.00267e-09	3.33304e-07	7.04205	7.04205	7.04205	7.04205	7.04205	12.246	12.4387	11.8806	12.1677	11.5398
5.29_296.0715m/z	296.072	5.28617	neg	Albendazole sulfone	82448	HMDB0060561	C16626	Organoheterocyclic compounds	Benzimidazoles	2-benzimidazolylcarbamic acid esters	M-H	C12H15N3O4S	1.61628	12.0355	7.04205	2.9178	7.04205	11.9334	-4.89133	0.0336948	Down	8.81552e-09	1.71406e-06	7.04205	7.04205	7.04205	7.04205	7.04205	11.9617	11.513	11.4632	12.2217	12.5074
12.31_854.5671m/z	854.567	12.3102	pos	PC(P-18:1/22:5-O)	242819	HMDB0289719		Lipids and lipid-like molecules	Glycerophospholipids	Glycerophosphocholines	M+Na	C48H82NO8P	0.118724	15.589	16.5346	2.91091	16.4669	10.0998	6.3671	82.5447	Up	0.0097308	0.040058	16.963	16.8054	16.5262	15.8149	16.225	7.04205	7.04205	7.04205	15.0475	14.3254
12.25_409.2735m/z	409.273	12.2544	neg	mLPA(O-16:0)	18151			Lipids and lipid-like molecules	Glycerophospholipids	Unclassified	M-H	C20H43O6P	2.54274	14.112	14.0946	2.90355	14.1278	9.08619	5.04165	32.9372	Up	1.24383e-05	0.000522278	14.4008	13.8547	14.1262	14.1792	14.0784	7.04205	9.44238	9.26376	9.87126	9.81153
13.34_774.5432m/z	774.543	13.3368	neg	PE(20:4/20:1)	20641	HMDB0009395	C00350	Lipids and lipid-like molecules	Glycerophospholipids	Glycerophosphoethanolamines	M-H2O-H	C45H80NO8P	-1.42992	17.7931	18.4871	2.90037	17.8605	10.9903	6.87017	116.984	Up	0.0230901	0.0735674	17.151	17.2458	18.268	18.2442	18.3936	7.04205	7.04205	7.04205	15.9773	17.8483
10.81_805.5610n	828.55	10.8102	pos	PC(20:5-OH/P-18:1)	242796	HMDB0289696		Lipids and lipid-like molecules	Glycerophospholipids	Glycerophosphocholines	M+, M+Na	C46H80NO8P	-1.40282	13.9002	16.3518	2.89875	16.3799	11.3768	5.00308	32.0683	Up	1.1634e-05	0.000510678	16.2503	16.6677	16.1905	16.1261	16.6649	10.9221	10.1952	11.4763	11.056	13.2347
10.40_401.2659m/z	401.266	10.3983	pos	9-deoxy-9-methylene-16,16-dimethyl -PGE2	3682			Lipids and lipid-like molecules	Fatty Acyls	Fatty acids and conjugates	M+Na	C23H38O4	-0.820754	10.4954	12.0861	2.88295	11.7998	7.04205	4.75775	27.0536	Up	1.37547e-09	3.9191e-07	11.4513	12.0732	12.1837	11.8562	11.4345	7.04205	7.04205	7.04205	7.04205	7.04205
12.85_409.2736m/z	409.274	12.849	neg	Minabeolide-4	44795			Lipids and lipid-like molecules	Steroids and steroid derivatives	Steroid lactones	M-H	C27H38O3	-3.07948	11.7863	11.6585	2.88095	11.7987	7.04205	4.75665	27.0331	Up	5.41571e-10	1.96393e-07	12.1381	11.3858	11.6273	11.7897	12.0526	7.04205	7.04205	7.04205	7.04205	7.04205
13.24_678.5064m/z	678.506	13.2402	pos	PA(18:0/15:1)	25208			Lipids and lipid-like molecules	Glycerophospholipids	Glycerophosphates	M+NH4	C36H69O8P	-0.620842	14.3973	16.073	2.87715	15.9083	9.82585	6.08244	67.7638	Up	0.00741487	0.033271	15.8946	16.1761	15.982	15.4887	16	7.04205	7.04205	7.04205	14.1475	13.8556
13.22_852.5508m/z	852.551	13.2194	pos	PE(18:2+=O/22:0)	236869	HMDB0283767		Lipids and lipid-like molecules	Glycerophospholipids	Glycerophosphoethanolamines	M+K	C45H84NO9P	-0.860301	14.66	13.8996	2.87505	14.1469	8.42308	5.72383	52.8499	Up	0.00353566	0.0201676	14.8195	14.6783	13.7854	13.6858	13.7655	7.04205	7.04205	7.04205	7.04205	13.9472
7.31_498.2911m/z	498.291	7.30907	neg	Taurodeoxycholic acid	46752	HMDB0000896	C05463	Lipids and lipid-like molecules	Steroids and steroid derivatives	Bile acids, alcohols and derivatives	M-H	C26H45NO6S	3.17526	7.04205	11.4441	2.87427	12.8573	7.84466	5.01261	32.2809	Up	3.72028e-05	0.000957432	13.967	13.1606	12.5892	12.5778	11.9918	7.04205	7.04205	7.04205	9.52657	8.5706
9.51_796.5687m/z	796.569	9.50647	pos	GlcCer(d16:1(15Me)/20:0(2OH)	40097			Lipids and lipid-like molecules	Fatty Acyls	Fatty acyl glycosides	M+K	C43H83NO9	-1.69069	11.3637	7.04205	2.85768	7.04205	12.0474	-5.00531	0.0311352	Down	8.44286e-05	0.00161916	7.04205	7.04205	7.04205	7.04205	7.04205	11.0736	12.7386	9.86989	12.9408	13.6139
9.67_370.2585m/z	370.259	9.67362	pos	PGH2	3642	HMDB0001381	C00427	Lipids and lipid-like molecules	Fatty Acyls	Eicosanoids	M+NH4	C20H32O5	-0.766278	9.10055	9.97361	2.85749	12.396	7.46856	4.92749	30.4313	Up	5.0289e-05	0.00116742	11.7828	11.8771	13.6824	13.3042	11.3337	7.04205	9.17462	7.04205	7.04205	7.04205
14.36_524.4582m/z	524.458	14.3567	pos	36:6(18Z,21Z,24Z,27Z,30Z,33Z)	1254			Lipids and lipid-like molecules	Fatty Acyls	Fatty acids and conjugates	M+	C36H60O2	-2.08732	10.5362	18.4855	2.82448	16.3972	10.489	5.90815	60.0524	Up	0.010655	0.0427593	9.67834	18.1281	18.0898	18.2003	17.8894	12.1126	11.4098	8.6822	9.88184	10.3588
12.47_717.5295m/z	717.53	12.466	neg	DG(20:4+=O/0:0/19:0)	249217	HMDB0296118		Lipids and lipid-like molecules	Fatty Acyls	Eicosanoids	M+FA-H	C42H72O6	-2.31146	7.04205	13.2106	2.82396	11.9173	7.04205	4.8753	29.3503	Up	8.79306e-05	0.00166235	9.49717	11.7361	12.2567	12.5602	13.5366	7.04205	7.04205	7.04205	7.04205	7.04205
4.64_248.0501m/z	248.05	4.63672	neg	Sulfapyridine	53160	HMDB0015028		Benzenoids	Benzene and substituted derivatives	Benzenesulfonamides	M-H	C11H11N3O2S	0.627462	13.3989	7.04205	2.80316	7.04205	11.6538	-4.61177	0.0408996	Down	1.46256e-06	0.000128973	7.04205	7.04205	7.04205	7.04205	7.04205	12.3066	11.4923	10.4662	11.4694	12.5346
13.24_804.5502m/z	804.55	13.2402	pos	PC(18:3-OH/P-18:1)	242822	HMDB0289722		Lipids and lipid-like molecules	Glycerophospholipids	Glycerophosphocholines	M+Na	C44H80NO8P	-1.47582	15.9119	19.4801	2.78263	18.9538	14.0951	4.85871	29.0146	Up	0.000216806	0.00314487	17.8479	19.3966	19.1838	19.0824	19.2585	12.3259	12.8315	13.8747	15.7422	15.7013
4.34_314.0803m/z	314.08	4.3417	pos	5,7,4'-Trihydroxy-3-methoxy-6-methylflavone	32769			Phenylpropanoids and polyketides	Flavonoids	O-methylated flavonoids	M+	C17H14O6	4.07028	11.5902	7.04205	2.76703	7.04205	11.4583	-4.41623	0.0468363	Down	1.84224e-08	3.19508e-06	7.04205	7.04205	7.04205	7.04205	7.04205	12.0261	11.6727	10.8228	11.3011	11.4687
13.34_772.5316m/z	772.532	13.3368	neg	PE(20:4/20:2)	50191	HMDB0009429	C00350	Lipids and lipid-like molecules	Glycerophospholipids	Glycerophosphoethanolamines	M-H2O-H	C45H78NO8P	3.66089	17.7229	17.1433	2.76277	17.7683	11.8435	5.92483	60.7509	Up	0.0139072	0.0510358	17.7198	17.8024	18.0827	17.9176	17.3191	7.04205	8.30496	12.9818	13.4071	17.4814
10.32_437.3121m/z	437.312	10.3163	pos	Ile-Ile-Ile-Pro	257551	HMDB0304800		Organic acids and derivatives	Carboxylic acids and derivatives	Amino acids, peptides, and analogues	M+H-H2O	C23H42N4O5	-0.359781	11.7867	7.04205	2.7493	7.04205	11.9104	-4.86834	0.034236	Down	0.000774727	0.00741099	7.04205	7.04205	7.04205	7.04205	7.04205	8.33992	12.6588	11.9431	13.2582	13.3519
9.51_466.2287m/z	466.229	9.50647	pos	22-dimethylarsinoyl-(5Z,8Z, 11Z,14Z,17Z,20Z)-docosahexaenoic acid	25			Lipids and lipid-like molecules	Fatty Acyls	Fatty acids and conjugates	M+NH4	C24H37AsO3	-2.13439	10.6871	7.04205	2.74527	7.04205	11.4822	-4.44017	0.0460654	Down	3.18506e-06	0.000218016	7.04205	7.04205	7.04205	7.04205	7.04205	11.2103	12.1223	10.0717	11.8977	12.109
13.68_850.4939m/z	850.494	13.6791	neg	alpha-Chaconine	62635	HMDB0039353	C10796	Lipids and lipid-like molecules	Steroids and steroid derivatives	Steroidal glycosides	M-H	C45H73NO14	-2.30344	7.04205	18.5872	2.74475	13.1404	7.04205	6.0984	68.5174	Up	0.0230258	0.0734798	7.04205	10.3495	12.2768	17.2227	18.8112	7.04205	7.04205	7.04205	7.04205	7.04205
4.55_242.0131m/z	242.013	4.55283	neg	O-Sulfotyrosine	144433	HMDB0155722		Organic acids and derivatives	Carboxylic acids and derivatives	Amino acids, peptides, and analogues	M-H2O-H	C9H11NO6S	0.87601	7.04205	9.83509	2.74053	11.6953	7.04205	4.65322	25.1628	Up	0.000135246	0.00229663	13.4607	12.8715	10.1113	11.8481	10.1847	7.04205	7.04205	7.04205	7.04205	7.04205
4.42_237.1034n	260.093	4.42258	pos	3-(Cyclohexylamino)-2-hydroxy-1-propanesulfonic acid	202587	HMDB0247339		Organic nitrogen compounds	Organonitrogen compounds	Cyclohexylamines	M+H, M+Na	C9H19NO4S	-0.227927	7.04205	7.04205	2.72225	7.04205	11.6133	-4.57124	0.0420649	Down	0.000157112	0.00255804	7.04205	7.04205	7.04205	7.04205	7.04205	11.0429	9.81444	13.8892	11.0935	12.2265
12.59_471.1467m/z	471.147	12.5905	neg	Apogossypolone	203604	HMDB0248524		Benzenoids	Naphthalenes	Naphthols and derivatives	M-H2O-H	C28H26O8	3.64098	12.8081	11.6588	2.71797	8.43411	13.0056	-4.57145	0.0420586	Down	0.000164123	0.00262926	10.524	8.9009	8.66152	7.04205	7.04205	13.1718	12.616	12.6321	13.8027	12.8053
13.22_856.5801m/z	856.58	13.2194	pos	PS(O-20:0/19:1)	22304			Lipids and lipid-like molecules	Glycerophospholipids	Glycerophosphoserines	M+K	C45H88NO9P	-3.35474	10.0649	13.461	2.71218	11.7984	7.31094	4.48748	22.4319	Up	6.75434e-05	0.00141806	11.4123	10.2841	11.3178	12.7101	13.2677	7.04205	7.04205	7.04205	7.04205	8.38649
10.95_741.5344n	722.517	10.9461	neg	PE(P-18:0/18:2+=O)	238426	HMDB0285324		Lipids and lipid-like molecules	Glycerophospholipids	Glycerophosphoethanolamines	M-H2O-H, M-H	C41H76NO8P	4.76927	20.6456	20.9458	2.70999	20.6396	16.1601	4.4795	22.3081	Up	5.57645e-05	0.00124969	20.604	20.7275	20.9082	21.0103	19.9481	14.9268	15.0849	15.9174	17.3234	17.5482
12.64_774.5413m/z	774.541	12.6398	pos	PG(18:0/18:2)	23460	HMDB0010605		Lipids and lipid-like molecules	Glycerophospholipids	Glycerophosphoglycerols	M+	C42H79O10P	0.330529	18.5025	17.7725	2.69555	18.3989	12.4225	5.97636	62.9597	Up	0.0234436	0.0744449	18.5371	18.6361	18.4267	18.2577	18.1368	7.04205	9.02069	11.3576	16.5539	18.1385
1.14_221.0667m/z	221.067	1.13785	neg	Ethyl glucuronide	50893	HMDB0010325		Organic oxygen compounds	Organooxygen compounds	Carbohydrates and carbohydrate conjugates	M-H	C8H14O7	0.124421	7.04205	11.3789	2.69539	11.3213	7.04205	4.27927	19.4173	Up	4.45368e-06	0.000258037	12.1134	11.111	12.0502	11.3809	9.95102	7.04205	7.04205	7.04205	7.04205	7.04205
12.64_744.5530m/z	744.553	12.6398	pos	PE(18:2/18:0)	20882	HMDB0009090	C00350	Lipids and lipid-like molecules	Glycerophospholipids	Glycerophosphoethanolamines	M+H	C41H78NO8P	-1.09013	11.9312	17.3787	2.69038	16.6924	12.4635	4.22886	18.7505	Up	1.48728e-06	0.000128973	16.0095	16.4459	16.709	16.8053	17.4922	12.8364	12.8935	12.7205	12.184	11.6831
4.06_338.0870m/z	338.087	4.05905	pos	2,8-Dihydroxyquinoline-beta-D-glucuronide	51444	HMDB0011658		Organic oxygen compounds	Organooxygen compounds	Carbohydrates and carbohydrate conjugates	M+H	C15H15NO8	-0.21234	7.04205	7.04205	2.67998	11.2503	7.04205	4.20829	18.485	Up	1.82397e-06	0.000148486	12.1941	11.5493	11.1423	11.2839	10.0821	7.04205	7.04205	7.04205	7.04205	7.04205
3.85_352.0591m/z	352.059	3.84928	neg	PYR-41	210716	HMDB0256938		Benzenoids	Benzene and substituted derivatives	Benzoic acids and derivatives	M-H2O-H	C17H13N3O7	4.21594	10.297	7.04205	2.64393	7.04205	11.0547	-4.01266	0.061954	Down	8.37169e-09	1.71406e-06	7.04205	7.04205	7.04205	7.04205	7.04205	10.8961	11.4073	11.3444	11.1198	10.5059
11.08_818.5202m/z	818.52	11.0762	neg	PE(P-18:0/5-iso PGF2VI)	238420	HMDB0285318		Lipids and lipid-like molecules	Fatty Acyls	Eicosanoids	M+FA-H	C41H76NO10P	1.7294	12.4115	15.9836	2.63798	15.7654	10.538	5.22741	37.4635	Up	0.00917457	0.0383218	15.6889	15.8704	16.073	16.1621	15.0325	7.04205	7.04205	11.0162	14.1194	13.4701
8.61_371.2082m/z	371.208	8.61043	neg	9K,12,13-diHODE	3013			Lipids and lipid-like molecules	Fatty Acyls	Lineolic acids and derivatives	M+FA-H	C18H30O5	2.1266	11.5904	7.04205	2.62608	7.32685	11.5011	-4.17429	0.0553875	Down	3.43723e-05	0.000919576	7.04205	7.04205	8.46607	7.04205	7.04205	10.6755	11.5808	11.3611	10.8548	13.0336
12.64_705.5300n	706.537	12.6398	pos	PC(16:0/14:0)	18238	HMDB0007965	C00157	Lipids and lipid-like molecules	Glycerophospholipids	Glycerophosphocholines	M+H, M+Na	C38H76NO8P	-1.25141	18.6489	22.8135	2.62439	22.1994	18.1201	4.07928	16.9039	Up	7.87454e-06	0.000397615	20.9255	22.6713	22.3782	22.3005	22.7215	18.094	17.4977	17.719	18.6151	18.6748
12.64_781.5604n	782.568	12.6398	pos	PC(16:0/20:4)	49589	HMDB0007982		Lipids and lipid-like molecules	Glycerophospholipids	Glycerophosphocholines	M+H, M+Na	C44H80NO8P	-2.23286	19.2526	22.8912	2.59894	22.1566	18.0159	4.14066	17.6386	Up	9.76078e-05	0.00176981	20.4632	22.5172	22.46	22.4676	22.8747	17.9072	17.377	16.9978	18.9109	18.8866
6.67_200.1290m/z	200.129	6.66825	neg	Methylisopelletierine	55145	HMDB0030326	C06184	Organoheterocyclic compounds	Piperidines	Unclassified	M+FA-H	C9H17NO	-1.31562	8.73803	8.71534	2.5897	7.04205	10.9685	-3.92641	0.0657709	Down	3.27297e-06	0.000218016	7.04205	7.04205	7.04205	7.04205	7.04205	10.0143	10.2488	11.383	11.5906	11.6056
10.39_490.1663m/z	490.166	10.3883	neg	Glisentide	207188	HMDB0252748		Benzenoids	Benzene and substituted derivatives	Benzenesulfonamides	M+FA-H	C22H27N3O5S	2.18946	10.6421	7.04205	2.58513	7.04205	11.1801	-4.13804	0.056797	Down	0.000180262	0.00280062	7.04205	7.04205	7.04205	7.04205	7.04205	8.9337	11.6955	10.6995	12.1931	12.3787
12.64_703.5741m/z	703.574	12.6398	pos	SM(d18:1/16:0)	39593	HMDB0010169		Lipids and lipid-like molecules	Sphingolipids	Phosphosphingolipids	M+H	C39H79N2O6P	-1.10795	21.4543	19.6192	2.58327	19.6436	13.7849	5.85871	58.0294	Up	0.0391511	0.109134	20.2019	19.8167	19.3845	19.566	19.249	7.04205	11.282	14.0791	15.0409	21.4805
13.41_770.5088m/z	770.509	13.4101	pos	PE(18:0/17:1)	20315			Lipids and lipid-like molecules	Glycerophospholipids	Glycerophosphoethanolamines	M+K	C40H78NO8P	-1.1129	17.2515	17.5079	2.55965	17.5981	11.8312	5.76694	54.453	Up	0.0383852	0.107603	17.6932	17.9073	17.8288	17.1707	17.3907	7.04205	7.04205	10.427	17.4065	17.2384
9.66_417.2294m/z	417.229	9.66338	neg	Norgestomet	209681	HMDB0255739		Lipids and lipid-like molecules	Steroids and steroid derivatives	Pregnane steroids	M+FA-H	C23H32O4	2.98791	7.04205	7.04205	2.55358	11.603	7.04205	4.56097	23.6041	Up	0.00427313	0.0227965	12.5193	12.2003	12.8949	13.3586	7.04205	7.04205	7.04205	7.04205	7.04205	7.04205
13.07_395.2809m/z	395.281	13.0698	neg	13-(3,4-dimethyl-5-propylfuran-2-yl)-tridecanoic acid	2632	HMDB0112078		Lipids and lipid-like molecules	Fatty Acyls	Fatty acids and conjugates	M+FA-H	C22H38O3	1.7467	7.04205	7.04205	2.54844	11.2547	7.31181	3.94292	15.3794	Up	6.93212e-05	0.00143463	11.111	10.5143	12.3871	12.1773	10.0839	7.04205	8.39085	7.04205	7.04205	7.04205
10.54_716.5216m/z	716.522	10.5421	pos	PA(20:2/16:1)	25462	HMDB0115536		Lipids and lipid-like molecules	Glycerophospholipids	Glycerophosphates	M+NH4	C39H71O8P	-1.25137	13.9235	13.4501	2.54609	13.1918	8.41357	4.77823	27.4404	Up	0.00908635	0.0379932	13.4607	13.6226	13.1776	13.5283	12.1698	7.04205	7.04205	7.04205	7.04205	13.8997
13.92_748.5269m/z	748.527	13.9154	pos	PE(O-16:0/20:4)	20975			Lipids and lipid-like molecules	Glycerophospholipids	Glycerophosphoethanolamines	M+Na	C41H76NO7P	2.42059	18.2767	19.0267	2.52915	19.0603	14.4436	4.61678	24.5353	Up	0.0057483	0.0278276	19.1207	19.343	19.3074	18.713	18.8175	12.2221	11.8206	13.4353	16.9963	17.7435
5.15_433.0738m/z	433.074	5.15443	neg	Urolithin B 3-O-glucuronide	64841	HMDB0041787		Organic oxygen compounds	Organooxygen compounds	Carbohydrates and carbohydrate conjugates	M+FA-H	C19H16O9	-9.81756	7.04205	9.03398	2.52334	10.8376	7.04205	3.79551	13.8855	Up	1.67692e-05	0.000623995	10.9123	10.6983	11.5774	11.6535	9.34636	7.04205	7.04205	7.04205	7.04205	7.04205
5.76_630.2688m/z	630.269	5.75658	pos	Brassica napus non-fluorescent chlorophyll catabolite 3	64035	HMDB0040917		Organoheterocyclic compounds	Tetrapyrroles and derivatives	Unclassified	M+	C34H38N4O8	-0.330837	11.1962	11.9284	2.52302	13.8251	9.94629	3.87876	14.7103	Up	9.1143e-05	0.0017069	13.6548	13.2914	14.7886	14.4146	12.9758	9.70881	11.2575	8.65946	9.96497	10.1407
13.24_778.5360m/z	778.536	13.2402	pos	PA(19:1/22:6)	25407			Lipids and lipid-like molecules	Glycerophospholipids	Glycerophosphates	M+NH4	C44H73O8P	-2.77015	15.7663	17.0932	2.49289	16.7473	11.8852	4.86206	29.0821	Up	0.0140927	0.0516214	16.7325	16.891	16.7132	16.6847	16.715	7.04205	9.3768	13.7208	14.562	14.7246
12.65_358.2725n	339.255	12.6452	neg	9,13-dihydroxy-10-ethoxy-11-octadecenoic acid	1720			Lipids and lipid-like molecules	Fatty Acyls	Fatty acids and conjugates	M-H2O-H, M+FA-H	C20H38O5	1.61312	7.04205	10.7255	2.48189	11.273	7.37581	3.89719	14.8994	Up	0.000414754	0.00498329	10.617	9.73192	12.5342	12.749	10.7329	7.04205	7.04205	7.04205	7.04205	8.71086
2.02_340.1044m/z	340.104	2.02175	neg	Epinephrine glucuronide	50903	HMDB0010336	C03033	Organic oxygen compounds	Organooxygen compounds	Carbohydrates and carbohydrate conjugates	M-H2O-H	C15H21NO9	1.65542	7.04205	7.04205	2.47962	10.653	7.04205	3.61092	12.2178	Up	3.38495e-06	0.000218016	10.9076	10.1294	11.8007	10.2157	10.2114	7.04205	7.04205	7.04205	7.04205	7.04205
1.88_376.1193m/z	376.119	1.88462	neg	S-(2-Hydroxy-3-buten-1-yl)glutathione	200045	HMDB0244552		Organic acids and derivatives	Carboxylic acids and derivatives	Amino acids, peptides, and analogues	M-H	C14H23N3O7S	2.42219	7.04205	11.4388	2.47305	10.598	7.04205	3.55598	11.7613	Up	6.54869e-07	8.00815e-05	9.84365	11.0135	10.9321	10.1336	11.0673	7.04205	7.04205	7.04205	7.04205	7.04205
9.43_347.1825m/z	347.183	9.42967	pos	Annuolide G	58600	HMDB0034605		Lipids and lipid-like molecules	Prenol lipids	Terpene lactones	M+H	C20H26O5	-7.99772	7.04205	7.04205	2.47129	10.8282	7.04205	3.78612	13.7955	Up	0.000190417	0.00286942	10.6085	10.321	12.4055	11.7547	9.05108	7.04205	7.04205	7.04205	7.04205	7.04205
12.95_752.5201m/z	752.52	12.9475	pos	PE(19:1/16:1)	20489			Lipids and lipid-like molecules	Glycerophospholipids	Glycerophosphoethanolamines	M+Na	C40H76NO8P	-0.0108098	14.9571	14.8942	2.45019	14.8234	10.4862	4.33722	20.2131	Up	0.00633327	0.0296868	15.2582	15.1774	14.5835	14.4392	14.6585	7.04205	10.645	10.828	9.60301	14.3127
4.30_360.0708m/z	360.071	4.29833	neg	Phosphonate analog	210331	HMDB0256484		Organoheterocyclic compounds	Imidazopyrimidines	Purines and purine derivatives	M+FA-H	C10H14N5O5P	-1.97503	7.04205	7.04205	2.44181	10.5473	7.04205	3.50523	11.3548	Up	2.51621e-06	0.000187082	11.0788	10.3754	9.85504	11.3967	10.0305	7.04205	7.04205	7.04205	7.04205	7.04205
5.29_381.0497m/z	381.05	5.28617	neg	4-Hydroxy-5-(dihydroxyphenyl)-valeric acid-O-methyl-O-sulphate	81995	HMDB0059977		Benzenoids	Phenols	Benzenediols	M+FA-H	C12H16O9S	-0.0555415	10.6241	7.04205	2.39616	7.04205	10.4009	-3.35885	0.0974734	Down	1.46233e-06	0.000128973	7.04205	7.04205	7.04205	7.04205	7.04205	10.4921	9.93784	9.66273	10.8258	11.086
11.39_801.5552n	800.548	11.3945	neg	PE(PGE1/P-18:0)	238469	HMDB0285367		Lipids and lipid-like molecules	Fatty Acyls	Eicosanoids	M-H, M+FA-H	C43H80NO10P	3.96888	19.2736	19.1455	2.38898	18.4971	13.9001	4.59698	24.2007	Up	0.0191266	0.0646156	18.3241	18.2254	18.2961	18.2215	19.4182	9.56604	11.3424	14.1238	16.6413	17.827
4.36_239.9974m/z	239.997	4.3557	neg	Indole carboxylic acid sulfate	257652	HMDB0304912		Organoheterocyclic compounds	Indoles and derivatives	Indolecarboxylic acids and derivatives	M-H	C9H7NO5S	0.681565	7.04205	9.4542	2.38289	10.6017	7.04205	3.55965	11.7913	Up	0.000231076	0.00329119	12.3191	11.3388	9.84503	10.4104	9.09524	7.04205	7.04205	7.04205	7.04205	7.04205
2.20_183.0271m/z	183.027	2.19542	neg	Dibenzothiophene	205816	HMDB0251165	C20125	Organoheterocyclic compounds	Benzothiophenes	Dibenzothiophenes	M-H	C12H8S	-1.38449	8.57493	8.9993	2.37903	10.3475	7.04205	3.30548	9.88665	Up	7.41401e-07	8.40115e-05	10.5618	10.3932	9.44137	10.4803	10.861	7.04205	7.04205	7.04205	7.04205	7.04205
13.37_439.1974m/z	439.197	13.3687	neg	3'-Hydroxy-HT2 toxin	59952	HMDB0036162		Lipids and lipid-like molecules	Prenol lipids	Sesquiterpenoids	M-H	C22H32O9	0.0511459	15.907	14.3531	2.36441	13.9764	17.295	-3.31863	0.100229	Down	9.17885e-06	0.000435886	14.9113	13.9974	14.3074	12.9492	13.7167	17.2934	17.6193	17.1662	17.2305	17.1656
11.96_362.2710m/z	362.271	11.9603	neg	N-methyl arachidonoyl amine	8598			Lipids and lipid-like molecules	Fatty Acyls	Fatty amides	M+FA-H	C21H35NO	2.82755	9.49764	7.04205	2.35867	7.04205	10.2617	-3.21965	0.107347	Down	2.30583e-07	3.17171e-05	7.04205	7.04205	7.04205	7.04205	7.04205	9.53854	10.341	10.3532	10.2958	10.7799
9.52_385.2241m/z	385.224	9.51695	neg	Berkeleylactone M	7914			Phenylpropanoids and polyketides	Macrolides and analogues	Unclassified	M-H	C20H34O7	2.3622	13.1209	7.04205	2.35445	9.20435	12.8084	-3.60405	0.0822382	Down	0.000733466	0.00718869	9.10766	9.75822	10.6733	7.04205	9.44049	12.2546	13.1618	12.6081	12.1396	13.878
11.50_452.2427m/z	452.243	11.4981	neg	PC(6:0/6:0)	18551			Lipids and lipid-like molecules	Glycerophospholipids	Glycerophosphocholines	M-H	C20H40NO8P	1.87191	9.13739	8.30603	2.35269	7.04205	10.2947	-3.2526	0.104922	Down	4.30556e-06	0.000258037	7.04205	7.04205	7.04205	7.04205	7.04205	9.12899	10.4793	10.5227	10.534	10.8082
12.66_718.5370m/z	718.537	12.6583	pos	PE(18:1/16:0)	49999	HMDB0009022	C00350	Lipids and lipid-like molecules	Glycerophospholipids	Glycerophosphoethanolamines	M+H	C39H76NO8P	-1.5203	15.9948	17.5687	2.34435	17.4578	12.7329	4.72487	26.444	Up	0.0312849	0.0921679	17.6089	17.6969	17.3753	17.2062	17.4016	8.45259	8.23929	14.7475	16.3705	15.8548
13.22_716.5223m/z	716.522	13.2194	pos	PE(16:0/18:2)	19943	HMDB0008928		Lipids and lipid-like molecules	Glycerophospholipids	Glycerophosphoethanolamines	M+H	C39H74NO8P	-0.31972	19.009	18.9939	2.33687	19.2775	15.289	3.98852	15.8732	Up	0.00715716	0.0322598	19.3076	19.4436	19.1512	19.4211	19.064	13.9023	13.1473	13.578	17.0395	18.7777
12.31_742.5367m/z	742.537	12.3102	pos	PE(20:3/16:0)	50123	HMDB0009319	C00350	Lipids and lipid-like molecules	Glycerophospholipids	Glycerophosphoethanolamines	M+H	C41H76NO8P	-1.9356	16.4947	16.3087	2.32617	15.8696	11.8129	4.05674	16.6418	Up	0.010066	0.0409311	16.0264	16.0833	15.746	15.6866	15.8056	10.6634	9.11419	10.2857	13.1212	15.8799
9.94_347.1826m/z	347.183	9.94487	pos	1,2,3-Tris(1-ethoxyethoxy)propane	60797	HMDB0037162		Lipids and lipid-like molecules	Glycerolipids	Unclassified	M+K	C15H32O6	-1.41872	7.04205	7.04205	2.32555	10.4792	7.04205	3.43719	10.8318	Up	0.000482235	0.00554421	10.4874	9.5872	12.0987	11.4746	8.74827	7.04205	7.04205	7.04205	7.04205	7.04205
0.59_243.2179m/z	243.218	0.5943	pos	Esaprazole	206486	HMDB0251940		Organic acids and derivatives	Carboxylic acids and derivatives	Amino acids, peptides, and analogues	M+NH4	C12H23N3O	-0.357572	12.4995	13.6634	2.32429	10.9184	7.04205	3.87638	14.6861	Up	0.00635853	0.0297702	12.2339	12.1063	12.8831	10.3267	7.04205	7.04205	7.04205	7.04205	7.04205	7.04205
3.76_291.0991m/z	291.099	3.76372	neg	(2S,4S)-Monatin	64406	HMDB0041309		Organic acids and derivatives	Carboxylic acids and derivatives	Amino acids, peptides, and analogues	M-H	C14H16N2O5	1.66997	7.04205	11.4429	2.31689	10.4275	7.04205	3.38543	10.45	Up	0.000356169	0.00452471	10.5845	11.5261	11.7312	8.73098	9.56453	7.04205	7.04205	7.04205	7.04205	7.04205
13.79_724.5267m/z	724.527	13.7905	pos	PE(O-16:0/18:2)	21056			Lipids and lipid-like molecules	Glycerophospholipids	Glycerophosphoethanolamines	M+Na	C39H76NO7P	2.23301	18.1478	18.7797	2.30172	19.1039	15.7558	3.3481	10.183	Up	0.000365842	0.00460361	18.7913	19.1779	19.1217	19.391	19.0377	15.0416	15.1319	15.0646	15.5796	17.9613
13.32_440.1369m/z	440.137	13.3165	neg	Alpelisib	257621	HMDB0304878		Organic acids and derivatives	Carboxylic acids and derivatives	Amino acids, peptides, and analogues	M-H	C19H22F3N5O2S	-1.00607	13.5102	11.2503	2.29972	11.6958	14.858	-3.16222	0.111706	Down	1.58892e-05	0.000615358	12.5013	11.741	11.9892	10.6547	11.5928	15.2386	15.2075	14.8568	14.5374	14.4498
1.18_497.0410m/z	497.041	1.17882	neg	Kaempferol 3-sulfate-7-alpha-arabinopyranoside	32062			Phenylpropanoids and polyketides	Flavonoids	Flavonoid glycosides	M-H	C20H18O13S	2.98759	14.4565	14.696	2.29542	11.2907	7.33774	3.95293	15.4864	Up	0.0116403	0.0452126	12.4823	12.5979	13.7569	10.5742	7.04205	7.04205	8.52051	7.04205	7.04205	7.04205
12.33_702.5080m/z	702.508	12.3309	pos	PA(17:1/18:2)	25157			Lipids and lipid-like molecules	Glycerophospholipids	Glycerophosphates	M+NH4	C38H69O8P	1.717	7.04205	8.48771	2.288	8.26087	11.8014	-3.54057	0.0859375	Down	0.00207063	0.0139056	7.04205	7.04205	9.90117	7.04205	10.277	11.4098	12.447	12.3889	11.5237	11.2378
5.42_400.1058m/z	400.106	5.42353	neg	Dda-tetracycline	205584	HMDB0250895		Phenylpropanoids and polyketides	Tetracyclines	Unclassified	M-H	C20H19NO8	4.98522	7.04205	7.04205	2.28142	10.1562	7.04205	3.1142	8.65897	Up	2.45725e-05	0.000771032	10.0602	9.76415	11.4265	10.2671	9.26324	7.04205	7.04205	7.04205	7.04205	7.04205
5.29_325.0935m/z	325.093	5.28617	neg	Homovanillyl alcohol glucuronide	197182	HMDB0240527		Organic oxygen compounds	Organooxygen compounds	Carbohydrates and carbohydrate conjugates	M-H2O-H	C15H20O9	1.69153	8.9619	12.1973	2.26416	11.61	8.22443	3.38561	10.4513	Up	0.000986895	0.00873286	10.8656	12.3257	10.8994	11.214	12.7456	7.04205	7.04205	8.25507	9.86245	8.92052
4.32_380.0544m/z	380.054	4.32135	neg	Vitisidin A	64672	HMDB0041596		Phenylpropanoids and polyketides	Flavonoids	O-methylated flavonoids	M-H2O-H	C20H15O9+	1.61623	10.2107	7.04205	2.2532	7.04205	10.0986	-3.05657	0.120193	Down	2.41698e-05	0.000771032	7.04205	7.04205	7.04205	7.04205	7.04205	10.7734	9.8285	8.83955	10.497	10.5546
10.36_716.5217m/z	716.522	10.3572	pos	PE(19:1/15:1)	20487			Lipids and lipid-like molecules	Glycerophospholipids	Glycerophosphoethanolamines	M+H	C39H74NO8P	-1.10217	12.9096	12.3918	2.23813	11.804	8.08799	3.71598	13.1408	Up	0.0099043	0.0405433	12.086	12.5058	11.9278	12.073	10.4272	7.04205	7.04205	7.04205	7.04205	12.2718
11.75_417.3361m/z	417.336	11.7465	pos	3beta,27-dihydroxy-5-cholesten-7-one	46485			Lipids and lipid-like molecules	Steroids and steroid derivatives	Bile acids, alcohols and derivatives	M+H	C27H44O3	-0.452164	10.2191	7.04205	2.22422	8.90658	11.863	-2.95639	0.128837	Down	2.12054e-05	0.000710828	9.31475	9.92383	8.40329	8.57014	8.32091	11.4127	12.0057	11.8544	12.1864	11.8556
12.83_383.2813m/z	383.281	12.8285	neg	Hippobutenolide A	7898			Lipids and lipid-like molecules	Fatty Acyls	Fatty alcohols	M+FA-H	C21H38O3	3.00696	7.04205	7.04205	2.22215	10.5683	7.34379	3.22451	9.34704	Up	0.00109621	0.00938369	10.5538	9.19647	11.7427	11.963	9.38554	7.04205	8.55077	7.04205	7.04205	7.04205
12.40_495.1468m/z	495.147	12.4039	neg	Phthalocyanine	210350	HMDB0256504	C14077	Organoheterocyclic compounds	Tetrapyrroles and derivatives	Phthalocyanines	M-H2O-H	C32H18N8	-1.57401	14.2971	13.274	2.19378	12.1365	15.1851	-3.04863	0.120857	Down	0.000431394	0.00513352	13.7053	12.2501	11.9462	10.535	12.2459	15.5887	14.7821	15.5016	15.212	14.8413
13.01_465.2247m/z	465.225	13.0143	neg	PA(17:2/0:0)	26086			Lipids and lipid-like molecules	Glycerophospholipids	Glycerophosphates	M+FA-H	C20H37O7P	-2.93979	12.1161	10.6059	2.18314	10.1589	12.9952	-2.8363	0.14002	Down	1.06266e-05	0.000490505	10.8203	10.0851	10.627	9.69921	9.56304	13.3826	13.1481	13.0241	12.9793	12.442
12.64_766.5699m/z	766.57	12.6398	pos	PC(P-20:0/14:1)	19757			Lipids and lipid-like molecules	Glycerophospholipids	Glycerophosphocholines	M+Na	C42H82NO7P	-3.01107	16.6615	18.4794	2.17923	17.107	13.0467	4.06035	16.6835	Up	0.0309197	0.0916334	16.303	16.4483	16.4305	17.9013	18.452	9.64675	9.88978	12.8683	16.3019	16.5266
4.06_405.1425m/z	405.143	4.06388	neg	10-Hydroxyloganin	35321		C11659	Lipids and lipid-like molecules	Prenol lipids	Terpene glycosides	M-H	C17H26O11	5.63859	7.04205	12.333	2.16746	10.3951	7.04205	3.35301	10.2178	Up	0.00559358	0.0272439	11.5022	11.5688	11.8076	7.04205	10.0547	7.04205	7.04205	7.04205	7.04205	7.04205
9.61_304.1673n	287.164	9.60902	pos	3-Polyprenyl-4-hydroxy-5-methoxybenzoate	82285	HMDB0060379	C17559	Benzenoids	Benzene and substituted derivatives	Benzoic acids and derivatives	M+H-H2O, M+H	C18H24O4	-0.684942	8.87703	9.68736	2.16227	11.8643	8.78715	3.07716	8.43952	Up	0.00144759	0.0111475	11.6467	11.0953	12.8307	12.8706	10.8784	8.75358	10.042	7.04205	8.84593	9.25223
10.79_765.5251m/z	765.525	10.7896	pos	N-(9Z-Octadecenoyl)-4E,14Z-sphingadienine-1-phosphocholine	211884	HMDB0258342		Organic nitrogen compounds	Organonitrogen compounds	Quaternary ammonium salts	M+K	C41H79N2O6P	-7.80599	16.0312	16.2967	2.16043	16.5362	12.5459	3.99034	15.8932	Up	0.0319197	0.0935544	16.6649	16.7442	16.5923	16.2405	16.4392	12.1225	7.04205	12.7532	15.0195	15.7922
13.22_826.5338m/z	826.534	13.2194	pos	PS(P-18:0/19:1)	22384			Lipids and lipid-like molecules	Glycerophospholipids	Glycerophosphoserines	M+K	C43H82NO9P	-2.67335	12.3756	13.3911	2.14901	13.357	10.1144	3.24257	9.4648	Up	0.00370175	0.0208269	13.4995	13.4408	13.7905	12.5321	13.5219	8.37418	9.21632	9.07684	12.3073	11.5973
10.64_335.1843m/z	335.184	10.6389	neg	Cymatherelactone	7871			Lipids and lipid-like molecules	Fatty Acyls	Eicosanoids	M+FA-H	C18H26O3	-7.2406	11.5874	10.0686	2.14602	8.9356	12.0194	-3.08378	0.117948	Down	0.00212744	0.0141912	9.22663	8.73686	7.04205	9.76628	9.90616	12.0179	10.3875	11.8868	12.8541	12.9506
6.16_630.2687m/z	630.269	6.15895	pos	Nummularine B	54303	HMDB0029334		Organic acids and derivatives	Carboxylic acids and derivatives	Amino acids, peptides, and analogues	M+K	C32H41N5O6	-0.227758	13.017	13.2505	2.13206	15.055	12.1681	2.88692	7.39691	Up	0.000513905	0.00577684	14.8548	14.2004	16.3104	15.8645	14.0451	12.2061	12.6252	11.1895	12.3085	12.5114
13.07_403.1803m/z	403.18	13.0698	neg	Rislenemdaz	210966	HMDB0257242		Benzenoids	Benzene and substituted derivatives	Benzyloxycarbonyls	M+FA-H	C19H23FN4O2	4.41969	13.0257	11.9918	2.13065	10.805	13.5561	-2.75106	0.148542	Down	5.07099e-05	0.00116926	10.9948	11.0351	11.2664	9.45643	11.2723	13.3734	13.6774	13.5908	13.7658	13.373
7.76_238.1450m/z	238.145	7.76315	neg	N-Cyclopropyl-trans-2-cis-6-nonadienamide	8767	HMDB0032210		Lipids and lipid-like molecules	Fatty Acyls	Fatty amides	M+FA-H	C12H19NO	0.669533	10.0668	7.04205	2.12871	7.04205	9.74303	-2.70098	0.153788	Down	1.19972e-05	0.000520185	7.04205	7.04205	7.04205	7.04205	7.04205	10.2511	8.89053	9.42964	9.68351	10.4604
4.97_230.9970m/z	230.997	4.96637	neg	4-Hydroxyphenylacetic acid sulfate	257646	HMDB0304906		Benzenoids	Phenols	1-hydroxy-2-unsubstituted benzenoids	M-H	C8H8O6S	0.386319	7.04205	13.2777	2.10987	9.88637	7.04205	2.84432	7.18166	Up	0.000426936	0.00511425	10.9103	9.54281	8.37787	11.0426	9.55821	7.04205	7.04205	7.04205	7.04205	7.04205
8.83_397.2236m/z	397.224	8.82773	neg	12-epi-12-iso-LGD2	4159			Lipids and lipid-like molecules	Fatty Acyls	Fatty acids and conjugates	M+FA-H	C20H32O5	1.18653	7.04205	7.04205	2.10601	9.72071	7.04205	2.67866	6.40261	Up	4.38665e-05	0.00107352	9.76917	9.31645	10.2888	10.5457	8.68341	7.04205	7.04205	7.04205	7.04205	7.04205
12.59_765.4328m/z	765.433	12.5905	neg	PA(20:5-3OH/18:2)	217062	HMDB0263960		Lipids and lipid-like molecules	Glycerophospholipids	Glycerophosphates	M-H	C41H67O11P	-2.61524	13.579	12.7384	2.10542	10.7238	13.6975	-2.97363	0.127306	Down	0.00194487	0.0133991	12.4916	11.5149	10.8793	8.71338	10.0201	13.7296	13.5625	13.4719	14.1877	13.5356
13.32_529.2815m/z	529.282	13.3165	neg	Proscillaridin A	44708		C12816	Lipids and lipid-like molecules	Steroids and steroid derivatives	Steroid lactones	M-H	C30H42O8	1.55372	16.7671	14.5213	2.09921	14.4684	17.0657	-2.59731	0.165247	Down	4.37129e-06	0.000258037	14.8243	14.5072	14.9878	13.6899	14.3326	17.1911	16.7914	17.0865	17.195	17.0643
4.95_249.0747m/z	249.075	4.9511	neg	6-Methyl-N-(2H-tetrazol-5-yl)pyridine-2-carboxamide	202724	HMDB0247503		Organoheterocyclic compounds	Pyridines and derivatives	Pyridinecarboxylic acids and derivatives	M+FA-H	C8H8N6O	2.46978	7.04205	7.04205	2.09328	9.63757	7.04205	2.59552	6.04409	Up	9.12201e-06	0.000435886	9.24472	9.02434	10.098	10.4015	9.4193	7.04205	7.04205	7.04205	7.04205	7.04205
4.26_257.1010m/z	257.101	4.25992	neg	5-Hydroxy-2-imino-1-methylimidazolidin-4-one	200439	HMDB0244988		Organic acids and derivatives	Carboxylic acids and derivatives	Amino acids, peptides, and analogues	2M-H	C4H7N3O2	2.3364	8.51452	8.63685	2.08108	10.4658	7.62387	2.8419	7.16962	Up	0.0013515	0.0106755	10.1188	9.93262	11.8316	11.2336	9.21223	7.04205	8.6271	7.04205	7.04205	8.36613
12.59_690.3982m/z	690.398	12.5905	neg	OHODiA-PC	27855			Lipids and lipid-like molecules	Glycerophospholipids	Glycerophosphocholines	M-H	C34H62NO11P	-0.807618	15.7562	15.2279	2.07542	12.5153	15.3756	-2.86035	0.137705	Down	0.00161912	0.0120497	13.96	13.0181	12.6373	10.4667	12.4941	15.4116	14.7874	15.0893	16.1077	15.4821
7.58_498.2698m/z	498.27	7.58172	neg	Fuziline	207028	HMDB0252558		Lipids and lipid-like molecules	Prenol lipids	Diterpenoids	M+FA-H	C24H39NO7	-2.39338	9.7443	8.3975	2.07381	8.0519	10.7808	-2.72885	0.150846	Down	0.000403163	0.00491809	8.76631	8.45766	8.95144	7.04205	7.04205	10.9056	10.055	10.6203	11.3009	11.0221
6.04_673.3208m/z	673.321	6.03722	neg	Furylacryloylalanyllysine	202612	HMDB0247373		Organic acids and derivatives	Carboxylic acids and derivatives	Amino acids, peptides, and analogues	2M-H	C16H23N3O5	0.863392	7.04205	10.383	2.06967	11.1829	8.30162	2.88124	7.36784	Up	0.00251413	0.0158574	11.851	10.7365	11.889	11.71	9.72775	9.04126	9.27828	7.04205	7.04205	9.10446
12.71_385.1484m/z	385.148	12.7071	neg	NNAL-N-glucuronide	82392	HMDB0060498		Organic oxygen compounds	Organooxygen compounds	Carbohydrates and carbohydrate conjugates	M-H	C16H24N3O8+	-1.59855	12.4476	11.4006	2.06871	10.7981	13.4514	-2.65337	0.158949	Down	0.000184889	0.00281497	12.184	10.8083	10.5738	10.0681	10.3562	13.6109	13.6721	13.733	13.4703	12.771
13.24_740.5215m/z	740.522	13.2402	pos	PE(P-16:0/20:4-OH(11R))	238292	HMDB0285190		Lipids and lipid-like molecules	Glycerophospholipids	Glycerophosphoethanolamines	M+H	C41H74NO8P	-1.28926	18.7219	19.2466	2.0667	19.073	15.1758	3.89721	14.8997	Up	0.0468028	0.124381	19.2088	19.2999	19.0771	18.5419	19.2374	9.86278	12.868	16.6481	18.0492	18.4509
5.20_330.2272m/z	330.227	5.2025	pos	5-Hydroxydec-7-enoylcarnitine	197630	HMDB0241079		Lipids and lipid-like molecules	Fatty Acyls	Fatty acid esters	M+H	C17H31NO5	-0.948796	11.007	8.65028	2.0536	9.47214	12.1377	-2.66555	0.157612	Down	0.0003059	0.00406745	9.65801	9.98483	10.1821	9.25794	8.27779	12.3126	11.628	11.3331	12.6035	12.8112
12.95_419.2145m/z	419.215	12.9475	pos	L-902,688	267239			Benzenoids	Benzene and substituted derivatives	Unclassified	M+	C21H27F2N5O2	2.94818	11.5546	10.4001	2.04812	9.23737	12.0584	-2.82098	0.141515	Down	0.00202315	0.0137411	10.8997	9.51302	9.32628	7.04205	9.40578	12.3359	12.014	11.8227	12.2294	11.8898
7.34_275.1615m/z	275.162	7.34273	pos	Acorusdiol	55638	HMDB0030919		Lipids and lipid-like molecules	Prenol lipids	Sesquiterpenoids	M+Na	C15H24O3	-0.890829	8.59983	7.04205	2.04708	11.0604	8.20588	2.85455	7.2328	Up	0.0026535	0.0164616	11.1044	10.1701	11.4133	12.2964	10.318	7.04205	9.92853	7.04205	8.50345	8.51332
12.64_730.5374m/z	730.537	12.6398	pos	PE(22:2/13:0)	20761			Lipids and lipid-like molecules	Glycerophospholipids	Glycerophosphoethanolamines	M+H	C40H76NO8P	-1.05571	21.0697	20.7606	2.04649	20.7214	18.0249	2.69653	6.48242	Up	0.000672361	0.00684356	20.9415	20.8982	20.647	20.6451	20.4752	17.4586	17.5254	17.5112	17.6279	20.0013
3.81_410.1581m/z	410.158	3.80905	neg	Ala-Glu-Phe	259350			Organic acids and derivatives	Carboxylic acids and derivatives	Amino acids, peptides, and analogues	M+FA-H	C17H23N3O6	3.32122	7.04205	10.2991	2.04387	10.3839	7.66314	2.72073	6.59204	Up	0.000942001	0.00846741	9.76849	9.45112	10.9688	11.451	10.2799	8.79707	7.04205	7.04205	8.39251	7.04205
13.79_690.5069m/z	690.507	13.7905	pos	PA(18:1/16:1)	25780	HMDB0114925		Lipids and lipid-like molecules	Glycerophospholipids	Glycerophosphates	M+NH4	C37H69O8P	0.0548841	13.7099	14.6008	2.03532	14.3628	11.3625	3.00033	8.00183	Up	0.00596949	0.0285862	14.3409	14.5852	14.4899	13.7514	14.6465	9.95557	9.89832	10.3775	13.4374	13.1435
13.84_407.2965m/z	407.296	13.8393	neg	4'-tert-Butyl-2',6'-dimethylacetophenone	293240			Organic oxygen compounds	Organooxygen compounds	Carbonyl compounds	2M-H	C14H20O	2.20427	11.1594	10.2795	2.02911	9.46087	12.2646	-2.80371	0.143219	Down	0.00262269	0.0163212	10.2712	9.5849	9.60712	7.04205	10.799	12.0628	12.1896	12.4643	12.0952	12.5109
8.57_451.2712m/z	451.271	8.56932	neg	3alpha,6alpha-Dihydroxy-7-oxo-5beta-cholan-24-oic Acid	46035			Lipids and lipid-like molecules	Steroids and steroid derivatives	Bile acids, alcohols and derivatives	M+FA-H	C24H38O5	2.63277	9.55254	7.04205	2.02716	8.63593	11.3696	-2.73364	0.150346	Down	0.00139126	0.0108819	7.04205	9.03796	9.98482	8.87662	8.23821	10.7959	12.0128	11.4161	12.037	10.586
6.15_257.1761m/z	257.176	6.14797	neg	heptanoate	257189	HMDB0304376		Lipids and lipid-like molecules	Fatty Acyls	Fatty acids and conjugates	2M-H	C7H13O2-	0.892793	10.4678	8.73672	2.02683	9.02104	11.5144	-2.4934	0.177588	Down	3.99316e-05	0.00100815	8.94098	9.14381	9.76859	8.8803	8.37154	11.8195	10.9561	11.1659	11.5274	12.1033
12.59_575.1846m/z	575.185	12.5905	neg	N-Acetyl-Asp-Glu-Val-Asp-CHO	203106	HMDB0247925		Organic acids and derivatives	Peptidomimetics	Hybrid peptides	M+FA-H	C21H30N4O12	0.79297	14.1509	12.4872	2.02654	12.1503	14.6051	-2.45483	0.182399	Down	1.83985e-05	0.000649484	12.7112	12.3962	12.2327	11.2338	12.1776	14.7972	14.802	14.5686	14.6772	14.1807
7.83_405.2656m/z	405.266	7.82558	neg	3alpha,7alpha-Dihydroxy-11-oxo-5beta-cholan-24-oic Acid	46211			Lipids and lipid-like molecules	Steroids and steroid derivatives	Bile acids, alcohols and derivatives	M-H	C24H38O5	2.25677	10.009	7.04205	2.02504	7.78243	10.74	-2.95759	0.128729	Down	0.00601865	0.0286839	7.04205	7.04205	10.7439	7.04205	7.04205	10.4712	10.9123	11.668	10.8184	9.83025
6.78_472.2540m/z	472.254	6.77742	neg	epothilone D	28235		C12039	Phenylpropanoids and polyketides	Macrolides and analogues	Epothilones and analogues	M-H2O-H	C27H41NO5S	2.55795	10.1791	9.22217	2.00725	9.26346	12.0329	-2.76943	0.146663	Down	0.00295394	0.0178534	9.32311	9.78689	10.1362	10.029	7.04205	11.9538	11.1975	11.6859	13.1497	12.1775
13.24_746.5090m/z	746.509	13.2402	pos	PE(P-18:1/18:3)	51304	HMDB0011410		Lipids and lipid-like molecules	Glycerophospholipids	Glycerophosphoethanolamines	M+Na	C41H74NO7P	-0.729412	16.5179	16.1917	2.001	16.2917	13.1489	3.1428	8.83235	Up	0.0162987	0.0574851	16.4072	16.4787	16.2515	16.5029	15.818	10.1386	12.5789	12.9667	13.4981	16.5621
11.24_766.5356m/z	766.536	11.2434	pos	PE(20:5-OH(18R)/P-18:0)	238437	HMDB0285335		Lipids and lipid-like molecules	Glycerophospholipids	Glycerophosphoethanolamines	M+H	C43H76NO8P	-3.2643	15.9546	15.8322	2.00006	16.0964	12.6653	3.43107	10.7859	Up	0.0313896	0.092272	16.1673	16.2701	16.0123	16.1884	15.8439	9.27326	9.78173	13.8118	14.8422	15.6176
0.72_403.0841m/z	403.084	0.7231	pos	Mavacoxib	208483	HMDB0254349		Organoheterocyclic compounds	Azoles	Pyrazoles	M+NH4	C16H11F4N3O2S	-1.47407	7.04205	7.04205	1.99547	9.4535	12.5414	-3.08794	0.117609	Down	0.015882	0.0565656	7.04205	10.485	7.04205	11.1894	11.5091	11.8595	12.6586	12.6618	12.6932	12.8341
5.40_373.0866m/z	373.087	5.40295	neg	N-(6-Methoxy-8-quinolyl)-4-toluenesulfonamide	199853	HMDB0244337		Benzenoids	Benzene and substituted derivatives	Toluenes	M+FA-H	C17H16N2O3S	0.783798	7.04205	7.04205	1.99152	10.2633	7.63144	2.63182	6.19809	Up	0.00169367	0.0123511	9.85335	9.03557	11.2278	11.3161	9.88343	7.04205	8.56794	7.04205	7.04205	8.46312
12.00_509.1236m/z	509.124	12.001	neg	Apigenidin	255964	HMDB0303074	C08574	Phenylpropanoids and polyketides	Flavonoids	Hydroxyflavonoids	2M-H	C15H11O4+	-1.11661	10.4911	9.31868	1.98994	7.04205	9.4097	-2.36766	0.19376	Down	2.04428e-05	0.000700544	7.04205	7.04205	7.04205	7.04205	7.04205	9.69649	9.66476	9.44846	9.86247	8.37633
12.77_497.1625m/z	497.163	12.7666	neg	Chamuvaritin	33963			Phenylpropanoids and polyketides	Diarylheptanoids	Linear diarylheptanoids	M+FA-H	C29H24O5	4.26668	11.1782	8.6808	1.98768	9.86121	12.3683	-2.50708	0.175911	Down	0.000393352	0.00482794	10.7909	9.51998	10.6877	9.5832	8.72423	12.4445	12.6816	12.4845	12.5761	11.6548
4.79_349.1511m/z	349.151	4.78533	neg	(2S)-2-Butanol O-[b-D-Apiofuranosyl-(1->6)-b-D-glucopyranoside]	64355	HMDB0041255		Organic oxygen compounds	Organooxygen compounds	Carbohydrates and carbohydrate conjugates	M-H2O-H	C15H28O10	1.97631	10.1897	7.04205	1.98345	7.54436	10.0449	-2.50055	0.176709	Down	0.000343478	0.00442944	7.04205	8.2573	8.33836	7.04205	7.04205	9.3166	10.7776	10.1936	9.44864	10.4881
5.85_339.1259m/z	339.126	5.84738	pos	2-Amino-4-oxo-4-alpha-hydroxy-6-(erythro-1',2',3'-trihydroxypropyl)-5,6,7,8-tetrahydroxypterin	51858	HMDB0012143	C05252	Organoheterocyclic compounds	Pteridines and derivatives	Pterins and derivatives	M+NH4	C9H15N5O8	-0.0190983	12.9969	13.5343	1.98042	9.95413	7.04205	2.91208	7.52705	Up	0.00967297	0.0399436	9.25654	10.1423	11.5958	7.04205	11.734	7.04205	7.04205	7.04205	7.04205	7.04205
4.64_543.2588m/z	543.259	4.63672	neg	PI(14:0/0:0)	24875			Lipids and lipid-like molecules	Glycerophospholipids	Glycerophosphoinositols	M-H	C23H45O12P	2.21577	8.4576	9.69114	1.97954	9.34067	7.04205	2.29862	4.91987	Up	2.94335e-06	0.000205983	9.45836	9.28363	10.0325	8.86773	9.06109	7.04205	7.04205	7.04205	7.04205	7.04205
7.35_265.1812m/z	265.181	7.35038	neg	Nonylphenol	35139	HMDB0038982	C14550	Benzenoids	Phenols	1-hydroxy-2-unsubstituted benzenoids	M+FA-H	C15H24O	1.20641	7.04205	7.04205	1.97506	7.04205	9.3333	-2.29125	0.204299	Down	2.85011e-06	0.00020526	7.04205	7.04205	7.04205	7.04205	7.04205	9.59483	8.76148	8.94937	9.64801	9.71279
7.79_410.2900m/z	410.29	7.79347	pos	20, 22-Dihydrodigoxigenin	82594	HMDB0060730		Lipids and lipid-like molecules	Steroids and steroid derivatives	Steroid lactones	M+NH4	C23H36O5	-0.353875	10.8388	9.18808	1.97463	9.47567	11.9559	-2.48026	0.179212	Down	0.000407245	0.00495028	9.47502	9.9118	9.79949	9.63428	8.55773	12.2713	11.0064	11.224	12.5161	12.7619
9.09_375.1776m/z	375.178	9.09393	pos	[4]-Gingerdiol 3,5-diacetate	62433	HMDB0039132		Benzenoids	Phenols	Methoxyphenols	M+Na	C19H28O6	-0.606411	9.69007	9.67054	1.97326	11.0552	8.45901	2.59616	6.04674	Up	0.00159941	0.0119477	11.2529	10.3956	11.9123	11.758	9.95703	7.04205	9.56043	8.64252	8.47495	8.57509
9.33_464.3369m/z	464.337	9.32825	pos	Spirotaccagenin	58457	HMDB0034424		Lipids and lipid-like molecules	Prenol lipids	Triterpenoids	M+NH4	C27H42O5	-0.346151	10.0019	10.1228	1.96304	9.37383	11.7339	-2.36004	0.194785	Down	8.0757e-05	0.00158507	9.09541	9.38571	9.9006	9.35223	9.13522	11.723	11.159	11.034	12.3111	12.4422
11.39_386.2684m/z	386.268	11.3894	pos	N-Eicosapentaenoyl Threonine	198586	HMDB0242080		Organic acids and derivatives	Carboxylic acids and derivatives	Amino acids, peptides, and analogues	M+H-H2O	C24H37NO4	-1.38592	10.0249	8.86149	1.96085	8.10801	10.6061	-2.49805	0.177016	Down	0.000981605	0.00873286	8.91721	8.47487	7.04205	7.04205	9.06388	9.85118	11.03	10.4688	10.7215	10.9588
10.43_846.5506m/z	846.551	10.4284	neg	PC(16:0/TXB2)	239034	HMDB0285933		Lipids and lipid-like molecules	Fatty Acyls	Eicosanoids	M-H	C44H82NO12P	0.468273	9.61008	15.2717	1.95532	11.4621	8.00469	3.45738	10.9844	Up	0.0495403	0.129739	11.3404	9.53523	10.0982	10.4494	15.8871	7.04205	7.04205	7.04205	7.04205	11.8553
9.54_323.2598m/z	323.26	9.53982	neg	13-Labdene-2,8,15-triol (ent-2a,8a,13E)-form)	534686			Lipids and lipid-like molecules	Prenol lipids	Diterpenoids	M-H	C20H36O3	1.80078	8.75913	9.40286	1.95494	7.28051	9.57541	-2.2949	0.203782	Down	2.90017e-05	0.000854668	8.23433	7.04205	7.04205	7.04205	7.04205	9.71725	9.24157	9.34029	9.62386	9.95407
11.44_447.1854m/z	447.185	11.4357	neg	Methyl 7-epi-12-hydroxyjasmonate glucoside	56235	HMDB0031763		Lipids and lipid-like molecules	Fatty Acyls	Fatty acyl glycosides	M+FA-H	C19H30O9	-4.52052	7.04205	10.1013	1.94955	11.4364	8.85333	2.58303	5.99197	Up	0.00228524	0.0149248	11.102	11.3384	11.2273	12.6492	10.865	8.80367	9.74731	9.77188	8.90175	7.04205
1.30_625.1260m/z	625.126	1.30498	neg	5'-Phosphoribosyl-N-formylglycinamidine	47902	HMDB0002305	C04640	Organic oxygen compounds	Organooxygen compounds	Carbohydrates and carbohydrate conjugates	2M-H	C8H16N3O8P	-2.82681	14.4702	14.879	1.94813	13.9581	11.607	2.35107	5.10203	Up	0.000154666	0.00252853	14.5454	13.9279	14.5014	13.6351	13.1806	12.2244	10.7864	11.8576	11.6242	11.5424
5.29_291.0831m/z	291.083	5.28617	neg	Ethylenediaminetetraaceticacid	211448	HMDB0257824		Organic acids and derivatives	Carboxylic acids and derivatives	Tetracarboxylic acids and derivatives	M-H	C10H16N2O8	-1.13448	7.04205	7.04205	1.94521	9.41213	7.04205	2.37008	5.16971	Up	0.000288408	0.0038606	9.10881	9.02657	10.2432	10.3595	8.32259	7.04205	7.04205	7.04205	7.04205	7.04205
3.98_275.1140m/z	275.114	3.98158	neg	Ethyl 3-O-beta-D-glucopyranosyl-butanoate	10217			Lipids and lipid-like molecules	Fatty Acyls	Fatty acyl glycosides	M-H2O-H	C12H22O8	1.37558	8.49338	8.64473	1.94485	10.5729	8.00571	2.56721	5.92661	Up	0.00261629	0.0163212	10.1251	9.51862	11.6719	11.5783	9.97071	8.43248	8.94422	7.04205	8.56777	7.04205
5.04_284.1855m/z	284.185	5.03713	pos	Octa-3,6-dienoylcarnitine	198243	HMDB0241718		Lipids and lipid-like molecules	Fatty Acyls	Fatty acid esters	M+H	C15H25NO4	-0.585301	9.44925	7.04205	1.94426	7.46566	9.96201	-2.49635	0.177224	Down	0.00107931	0.00929142	7.04205	7.04205	9.1601	7.04205	7.04205	10.0821	9.61509	9.1203	10.3908	10.6017
7.97_456.2979m/z	456.298	7.97232	neg	3-Hydroxyhexadecadienoylcarnitine	52259	HMDB0013335		Lipids and lipid-like molecules	Fatty Acyls	Fatty acid esters	M+FA-H	C23H41NO5	2.87707	9.99813	9.82155	1.94008	8.96503	11.5018	-2.53678	0.172327	Down	0.00192063	0.013278	9.30866	9.42933	9.33175	9.71333	7.04205	11.6239	10.8243	10.8851	12.0684	12.1073
4.97_189.1129m/z	189.113	4.96637	neg	Tetrahydro-2,5-dimethyl-2H-pyranmethanol	83428	HMDB0061931		Organoheterocyclic compounds	Oxanes	Unclassified	M+FA-H	C8H16O2	-2.17734	8.72146	8.77059	1.93934	10.8349	8.36178	2.47314	5.55252	Up	0.00110364	0.00938684	10.751	9.87527	11.6299	11.5664	10.352	7.04205	9.24193	8.40914	8.70598	8.4098
4.62_348.2036m/z	348.204	4.61595	neg	5-Hydroxy-2-propylpentanoylcarnitine	198420	HMDB0241899		Lipids and lipid-like molecules	Fatty Acyls	Fatty acid esters	M+FA-H	C15H29NO5	2.62591	10.0673	8.47663	1.93581	7.9639	10.3726	-2.40872	0.188323	Down	0.000656367	0.0067655	8.46829	8.71575	8.55134	7.04205	7.04205	10.3148	9.52807	10.4701	10.9808	10.5693
5.53_444.2227m/z	444.223	5.5306	neg	Candoxatrilat	204502	HMDB0249582		Organic acids and derivatives	Carboxylic acids and derivatives	Dicarboxylic acids and derivatives	M+FA-H	C20H33NO7	-3.06803	8.93031	8.29144	1.9283	8.27127	10.6169	-2.34567	0.196736	Down	0.000317639	0.00414072	8.31448	8.98669	8.7236	8.28954	7.04205	10.4759	10.1782	10.2708	11.2379	10.9219
13.07_405.1747m/z	405.175	13.0698	neg	Alanylasparagine	53723	HMDB0028682		Organic acids and derivatives	Carboxylic acids and derivatives	Amino acids, peptides, and analogues	2M-H	C7H13N3O4	1.95765	17.6532	16.6978	1.92801	15.899	18.1159	-2.2169	0.215104	Down	1.67018e-05	0.000623995	16.1872	16.2065	16.0684	14.9693	16.0637	17.9414	18.2067	18.1727	18.2703	17.9886
15.14_312.3259m/z	312.326	15.1374	pos	6Z,9Z-Eicosadien-11-ol	6275			Lipids and lipid-like molecules	Fatty Acyls	Fatty alcohols	M+NH4	C20H38O	-0.784984	11.1494	11.1284	1.91966	8.36477	11.1485	-2.78374	0.145215	Down	0.0107262	0.0428038	10.112	7.04205	10.5857	7.04205	7.04205	11.4182	11.6365	10.3669	11.112	11.209
9.90_249.1484m/z	249.148	9.90245	pos	Perezone	210177	HMDB0256311		Lipids and lipid-like molecules	Prenol lipids	Sesquiterpenoids	M+H	C15H20O3	-0.67679	8.61155	8.52357	1.91736	10.394	7.94483	2.44921	5.46116	Up	0.00164022	0.0121164	10.1846	9.99009	11.3096	11.1376	9.34831	7.04205	8.25324	7.04205	8.63849	8.7483
9.94_265.1813m/z	265.181	9.9352	neg	Humulenol II	61640	HMDB0038212		Lipids and lipid-like molecules	Prenol lipids	Sesquiterpenoids	M+FA-H	C15H24O	1.60502	7.04205	10.1087	1.9133	9.69422	7.04205	2.65217	6.28613	Up	0.00614196	0.0291323	9.55999	10.2826	7.04205	10.2806	11.3058	7.04205	7.04205	7.04205	7.04205	7.04205
7.29_226.1449m/z	226.145	7.28842	neg	N-octanoyl-homoserine lactone	8997			Organic acids and derivatives	Carboxylic acids and derivatives	Amino acids, peptides, and analogues	M-H	C12H21NO3	0.0782827	9.24784	7.04205	1.91262	7.28149	9.5104	-2.22891	0.21332	Down	5.03374e-05	0.00116742	7.04205	7.04205	8.23924	7.04205	7.04205	9.27676	9.4394	9.429	9.29857	10.1082
12.75_533.2125m/z	533.212	12.7474	neg	Rimegepant	257603	HMDB0304859		Organoheterocyclic compounds	Imidazopyridines	Unclassified	M-H	C28H28F2N6O3	1.22535	14.2269	13.4	1.91256	13.0007	15.2084	-2.20768	0.216482	Down	3.71721e-05	0.000957432	13.6318	13.2128	13.2409	12.4159	12.5019	15.2635	15.4503	15.4476	15.1662	14.7142
12.59_401.1646m/z	401.165	12.5905	neg	Bay-41-8543	203926	HMDB0248896		Organoheterocyclic compounds	Pyrazolopyridines	Unclassified	M-H2O-H	C21H21FN8O	0.497603	14.2059	13.506	1.91101	11.6565	14.062	-2.40547	0.188748	Down	0.00133468	0.0105846	12.7737	12.0095	11.9603	9.96234	11.5767	14.0148	13.6283	13.8885	14.7218	14.0565
12.17_549.1689m/z	549.169	12.1693	neg	Raffinose	48041	HMDB0003213	C00492	Organic oxygen compounds	Organooxygen compounds	Carbohydrates and carbohydrate conjugates	M+FA-H	C18H32O16	3.26913	12.4871	11.4518	1.9108	11.239	13.3901	-2.15116	0.225132	Down	4.82298e-06	0.000270937	11.5736	11.6153	10.6581	11.0658	11.2821	13.6887	13.4296	13.3532	13.3733	13.1059
7.58_430.2820m/z	430.282	7.58172	neg	3-Hydroxy-cis-5-tetradecenoylcarnitine	52254	HMDB0013330		Lipids and lipid-like molecules	Fatty Acyls	Fatty acid esters	M+FA-H	C21H39NO5	2.42219	9.50926	8.73243	1.9029	9.17212	11.4753	-2.30321	0.202611	Down	0.000447037	0.00526027	9.51461	9.16585	9.98419	8.93745	8.25852	11.4578	10.4814	11.4025	11.9898	12.0451
10.79_937.5703m/z	937.57	10.7891	neg	PG(i-20:0/TXB2)	225020	HMDB0271918		Lipids and lipid-like molecules	Fatty Acyls	Eicosanoids	M+FA-H	C46H85O14P	4.91842	13.1002	11.7189	1.89945	11.6384	13.8102	-2.1718	0.221934	Down	2.98347e-05	0.000864563	12.108	10.8612	11.5108	12.0175	11.6945	13.7099	14.1003	14.0009	13.3592	13.8806
12.64_719.5449n	720.552	12.6398	pos	PE(18:0/16:0)	20894	HMDB0008989	C00350	Lipids and lipid-like molecules	Glycerophospholipids	Glycerophosphoethanolamines	M+H, M+Na	C39H78NO8P	-2.25991	15.6343	19.1632	1.89905	16.1445	12.9435	3.20095	9.19567	Up	0.0407705	0.111852	14.9706	14.7586	14.7398	16.9023	19.351	11.1905	10.6449	12.5966	14.8012	15.4843
9.14_339.2157m/z	339.216	9.14367	neg	oscr#21	10345			Lipids and lipid-like molecules	Fatty Acyls	Fatty acids and conjugates	M-H2O-H	C19H34O6	-5.50581	9.93842	9.35903	1.8968	8.94586	11.0912	-2.14539	0.226034	Down	2.29569e-05	0.000738507	9.18736	9.23652	8.32262	9.23412	8.74868	10.6937	10.6958	11.2251	11.4531	11.3884
10.14_265.1812m/z	265.181	10.1416	neg	Tetranor-12(R)-HETE	266288			Lipids and lipid-like molecules	Fatty Acyls	Fatty acids and conjugates	M-H	C16H26O3	1.05665	9.16991	7.04205	1.89638	7.99211	10.4543	-2.46216	0.181474	Down	0.00291689	0.0176975	7.04205	8.85896	7.04205	8.43128	8.58621	10.4296	9.26229	9.7779	11.2665	11.5351
14.83_341.2703m/z	341.27	14.828	neg	10Z-nonadecenoic acid	854	HMDB0013622		Lipids and lipid-like molecules	Fatty Acyls	Fatty acids and conjugates	M+FA-H	C19H36O2	1.84951	12.2041	12.0419	1.89469	14.5037	12.1535	2.35014	5.09874	Up	0.0011742	0.00973778	14.3225	13.5997	15.4454	15.4917	13.6591	11.7094	13.0586	11.8097	12.0297	12.1603
6.75_382.2585m/z	382.259	6.75065	pos	4,5-Dihydrocortisol	201941	HMDB0246609		Lipids and lipid-like molecules	Steroids and steroid derivatives	Hydroxysteroids	M+NH4	C21H32O5	-0.716689	11.01	9.90769	1.89427	10.1441	12.4785	-2.33441	0.198277	Down	0.000797696	0.0075258	9.98164	10.554	10.8441	10.2127	9.12776	12.3	11.8463	11.7312	13.0745	13.4402
11.54_478.8487m/z	478.849	11.542	neg	3-(3,5-Diiodo-4-hydroxyphenyl)lactate	81730	HMDB0059636	C04367	Phenylpropanoids and polyketides	Phenylpropanoic acids	Unclassified	M+FA-H	C9H8I2O4	-1.52872	12.263	10.8108	1.89217	10.8007	12.89	-2.08926	0.235001	Down	5.94367e-07	7.64816e-05	10.6305	10.8136	10.6611	11.0777	10.8207	13.1551	13.2102	12.8093	12.6651	12.6102
12.21_499.1529m/z	499.153	12.213	neg	serine glutamate	211808	HMDB0258248		Organic acids and derivatives	Carboxylic acids and derivatives	Amino acids, peptides, and analogues	2M-H	C8H14N2O7	-0.125118	10.6624	9.48967	1.88785	9.28179	11.3791	-2.09731	0.233694	Down	2.49257e-06	0.000187082	9.30904	9.69404	8.98254	9.504	8.91934	11.7237	11.4643	11.2397	11.1748	11.293
5.55_307.0781m/z	307.078	5.55125	neg	4-Fluorophenylacetic acid	257885			Benzenoids	Benzene and substituted derivatives	Halobenzenes	2M-H	C8H7FO2	-1.93721	8.80667	8.88402	1.8877	10.8148	8.43891	2.37584	5.19039	Up	0.00152623	0.0115524	10.6322	10.0218	11.6262	11.6677	10.1259	7.04205	9.09521	8.688	8.74227	8.62703
10.79_511.3023m/z	511.302	10.7891	neg	1-Stearoylglycerophosphoglycerol	83279	HMDB0061697		Lipids and lipid-like molecules	Glycerophospholipids	Glycerophosphoglycerols	M-H	C24H49O9P	-3.61445	11.2092	12.9124	1.88327	12.2457	9.33174	2.91395	7.53678	Up	0.0225034	0.0723335	11.8253	11.4062	12.3747	12.3388	13.2834	7.04205	7.04205	9.73401	11.3761	11.4645
13.51_444.2777m/z	444.278	13.5138	pos	Oxatomide	196992	HMDB0240225		Benzenoids	Benzene and substituted derivatives	Diphenylmethanes	M+NH4	C27H30N4O	4.52585	7.04205	7.04205	1.88025	10.7837	8.2973	2.48644	5.60392	Up	0.00437569	0.0231732	10.4911	10.0533	10.676	12.1903	10.5078	7.04205	9.34695	7.04205	9.10788	8.94756
7.19_312.0897m/z	312.09	7.19075	pos	4-Hydroxybenzyl isothiocyanate rhamnoside	57071	HMDB0032801		Organic oxygen compounds	Organooxygen compounds	Carbohydrates and carbohydrate conjugates	M+H	C14H17NO5S	-1.06878	7.04205	7.04205	1.87823	10.1071	7.6922	2.41488	5.33275	Up	0.0032594	0.0189284	9.81786	9.61252	10.9575	11.1984	8.9491	7.04205	8.50059	7.04205	7.04205	8.83427
4.95_281.1012m/z	281.101	4.9511	neg	Dimetridazole	206033	HMDB0251409		Organoheterocyclic compounds	Azoles	Imidazoles	2M-H	C5H7N3O2	2.94036	7.04205	7.04205	1.87289	9.16387	7.04205	2.12182	4.35244	Up	4.55638e-05	0.00110455	9.09621	8.39104	9.51994	9.94352	8.86865	7.04205	7.04205	7.04205	7.04205	7.04205
9.51_435.3332m/z	435.333	9.50647	pos	N-Linoleoyl Histidine	198483	HMDB0241977		Organic acids and derivatives	Carboxylic acids and derivatives	Amino acids, peptides, and analogues	M+NH4	C24H39N3O3	0.499764	7.04205	7.04205	1.86972	7.04205	9.55842	-2.51637	0.174782	Down	0.00548618	0.0269263	7.04205	7.04205	7.04205	7.04205	7.04205	9.48907	10.6912	7.04205	9.93334	10.6365
4.05_292.1230m/z	292.123	4.05413	neg	Paclobutrazol	209963	HMDB0256072		Benzenoids	Benzene and substituted derivatives	Phenethylamines	M-H	C15H20ClN3O	2.63745	9.59626	10.0917	1.86847	11.7312	9.38028	2.35096	5.10162	Up	0.00218989	0.0144861	11.6364	10.6742	13.0575	12.5057	10.7824	8.86278	9.92162	8.70114	9.66195	9.7539
9.74_247.1691m/z	247.169	9.73513	pos	dinor-12-oxo PDA	3358			Lipids and lipid-like molecules	Fatty Acyls	Eicosanoids	M+H-H2O	C16H24O3	-0.461966	7.04205	8.26921	1.86824	10.5728	8.27724	2.29555	4.90941	Up	0.00141419	0.0109965	10.1745	10.2574	11.3566	11.4783	9.59711	8.5132	8.83154	7.04205	8.55464	8.4448
6.45_193.1196m/z	193.12	6.44865	pos	2,6-Dimethylocta-cis-2,7-diene-1,6-diol	255428	HMDB0302472		Lipids and lipid-like molecules	Prenol lipids	Monoterpenoids	M+Na	C10H18O2	-1.64929	8.60918	8.87277	1.86523	10.9324	8.49847	2.43396	5.40373	Up	0.00495541	0.0250852	10.5038	9.979	12.2036	11.8566	10.1192	8.63915	9.74068	7.04205	8.2811	8.78939
7.16_360.2741m/z	360.274	7.1637	pos	3-hydroxydodecanoylcarnitine	8321	HMDB0061638		Lipids and lipid-like molecules	Fatty Acyls	Fatty acid esters	M+H	C19H37NO5	-0.974816	14.6317	13.7957	1.86085	13.7471	15.8186	-2.07145	0.237921	Down	2.27128e-05	0.000736597	13.752	14.139	13.8307	13.6325	13.3813	15.4875	15.3716	15.6309	16.3282	16.2747
8.81_331.2265m/z	331.227	8.80758	pos	Deoxycorticosterone	44982	HMDB0000016	C03205	Lipids and lipid-like molecules	Steroids and steroid derivatives	Hydroxysteroids	M+H	C21H30O3	-0.799642	10.8562	8.74273	1.8559	10.2649	12.4765	-2.21158	0.215897	Down	0.000749564	0.00727496	10.8517	10.9235	8.88907	10.5468	10.1135	11.7401	12.5289	12.5573	12.8364	12.72
0.61_112.0872m/z	112.087	0.608067	pos	Histamine	47272	HMDB0000870	C00388	Organic nitrogen compounds	Organonitrogen compounds	Amines	M+H	C5H9N3	2.22419	10.9605	7.04205	1.85301	9.84655	7.47952	2.36703	5.15878	Up	0.00269326	0.0165794	10.4648	8.68475	10.2476	9.4756	10.36	7.04205	7.04205	9.2294	7.04205	7.04205
12.60_311.2232m/z	311.223	12.6037	neg	(E)-3-Heptenyl acetate	61148	HMDB0037618		Organic acids and derivatives	Carboxylic acids and derivatives	Carboxylic acid derivatives	2M-H	C9H16O2	1.20453	7.04205	7.04205	1.85169	10.2129	7.78048	2.4324	5.39789	Up	0.00599039	0.0286386	9.97962	9.78904	11.3711	11.1082	8.81647	7.04205	9.20348	7.04205	7.04205	8.57277
13.94_763.5146n	764.522	13.9361	pos	PE(22:5/16:1)	50324	HMDB0009650	C00350	Lipids and lipid-like molecules	Glycerophospholipids	Glycerophosphoethanolamines	M+H, M+Na	C43H74NO8P	-0.851107	18.5119	19.2607	1.85127	19.0202	15.8885	3.13166	8.7644	Up	0.0469609	0.124635	19.0763	19.3577	18.6284	18.9633	19.0752	11.298	14.4907	17.3962	18.0339	18.2238
0.79_352.9686m/z	352.969	0.78705	neg	Diphosphoglucuronic acid	206084	HMDB0251462		Organic oxygen compounds	Organooxygen compounds	Carbohydrates and carbohydrate conjugates	M-H	C6H12O13P2	1.62736	13.3798	12.7487	1.85114	11.7596	14.151	-2.3914	0.190597	Down	0.00438601	0.0231732	12.6584	11.8273	9.6131	11.6725	13.0269	13.8598	14.3018	13.9692	13.9981	14.6263
4.95_181.0867m/z	181.087	4.9511	neg	2,3,5-Trimethylphenol	255508	HMDB0302561		Benzenoids	Phenols	Cresols	M+FA-H	C9H12O	-2.57221	8.36424	9.19014	1.8503	10.5278	8.22621	2.30162	4.93011	Up	0.00183178	0.0128458	10.3168	9.30377	11.1826	11.6062	10.2298	7.04205	8.77495	8.33224	8.50757	8.47426
4.83_444.1823m/z	444.182	4.83448	neg	4-Hydroxynonenal glutathione	197226	HMDB0240578		Organic acids and derivatives	Carboxylic acids and derivatives	Amino acids, peptides, and analogues	M-H2O-H	C19H33N3O8S	2.87851	7.04205	7.04205	1.84786	9.70839	7.30372	2.40467	5.29515	Up	0.00451872	0.0236862	9.16226	8.76184	11.0702	11.0309	8.51664	7.04205	7.04205	7.04205	8.35039	7.04205
9.94_257.1897m/z	257.19	9.94487	pos	6-[5]-ladderane-hexanoic acid	2525			Lipids and lipid-like molecules	Fatty Acyls	Fatty acids and conjugates	M+H-H2O	C18H26O2	-1.20743	7.04205	7.04205	1.84759	9.5343	7.28585	2.24845	4.75171	Up	0.00141892	0.0110118	9.35921	9.17622	10.4542	10.3863	8.29551	7.04205	8.26106	7.04205	7.04205	7.04205
0.64_157.1700m/z	157.17	0.637133	pos	quinolizidine	210818	HMDB0257048		Organoheterocyclic compounds	Quinolizines	Unclassified	M+NH4	C9H17N	0.235873	10.9232	7.04205	1.84377	7.04205	9.52027	-2.47822	0.179465	Down	0.00807709	0.0352126	7.04205	7.04205	7.04205	7.04205	7.04205	7.04205	10.2087	8.89354	10.5072	10.9499
13.34_423.1467m/z	423.147	13.3368	neg	Eltrombopag	206349	HMDB0251758		Benzenoids	Benzene and substituted derivatives	Biphenyls and derivatives	M-H2O-H	C25H22N4O4	0.91097	14.0166	13.3838	1.84361	12.8327	14.901	-2.06835	0.238432	Down	6.33304e-05	0.00137296	13.5762	13.071	12.6527	12.0615	12.8019	15.2737	14.9484	14.9041	14.7755	14.6035
8.65_317.2126m/z	317.213	8.65178	neg	8,15-diHETE(n-3)	4051			Lipids and lipid-like molecules	Fatty Acyls	Eicosanoids	M-H2O-H	C20H32O4	0.99387	10.0426	9.56758	1.84138	8.64257	10.92	-2.2774	0.20627	Down	0.00171726	0.0124097	7.04205	8.72632	9.32812	9.28618	8.83016	10.6954	10.4117	10.4002	11.4594	11.6331
9.88_468.3680m/z	468.368	9.88192	pos	3alpha,7alpha,15alpha-Trihydroxy-5beta-cholestan-26-oic acid	46508			Lipids and lipid-like molecules	Steroids and steroid derivatives	Bile acids, alcohols and derivatives	M+NH4	C27H46O5	-0.761999	10.3971	11.0013	1.83879	9.68363	11.7196	-2.03599	0.24384	Down	3.22743e-05	0.000887877	9.99961	9.08397	10.1928	9.33287	9.8089	11.8387	11.2303	11.8329	11.7168	11.9795
6.82_211.0974m/z	211.097	6.81507	neg	3,4-Methyleneazelaic acid	81791	HMDB0059744		Lipids and lipid-like molecules	Fatty Acyls	Fatty acids and conjugates	M-H	C11H16O4	-0.684924	9.70943	9.63384	1.83443	11.4682	9.31181	2.1564	4.45802	Up	0.000558024	0.00613211	11.3786	10.4593	12.4212	12.1611	10.9208	9.39784	9.1111	9.42639	9.68173	8.94197
10.77_452.2926n	497.291	10.7668	neg	DIHYDROCELASTROL	266879			Benzenoids	Phenanthrenes and derivatives	Unclassified	M-H, M+FA-H	C29H40O4	-0.12674	9.42639	11.8438	1.83408	11.6171	9.24646	2.37061	5.1716	Up	0.00377059	0.0210478	12.2477	11.7887	11.0084	11.4819	11.5587	7.04205	9.85766	9.752	9.72017	9.86042
0.61_108.0688n	126.103	0.61365	pos	2,5-Dimethylpyrazine	59172	HMDB0035289		Organoheterocyclic compounds	Diazines	Pyrazines	M+H, M+NH4	C6H8N2	0.732496	13.7282	12.5324	1.82773	13.647	11.6208	2.02615	4.07317	Up	4.70523e-05	0.00111721	13.71	13.4503	13.4951	13.5495	14.0301	11.1416	12.4901	11.6107	11.5537	11.308
11.22_414.2660m/z	414.266	11.2237	neg	N-Docosahexaenoyl Serine	198527	HMDB0242021		Organic acids and derivatives	Carboxylic acids and derivatives	Amino acids, peptides, and analogues	M-H	C25H37NO4	2.56714	9.10625	7.04205	1.82643	7.36125	9.52024	-2.15899	0.223913	Down	0.000860498	0.00792731	8.63807	7.04205	7.04205	7.04205	7.04205	8.56386	9.92958	9.34799	9.66915	10.0906
8.44_309.2077m/z	309.208	8.4444	neg	9S,10S,11R-trihydroxy-12Z,15Z-octadecadienoic acid	2981			Lipids and lipid-like molecules	Fatty Acyls	Lineolic acids and derivatives	M-H2O-H	C18H32O5	1.59502	7.04205	9.14779	1.8237	10.3904	8.07011	2.3203	4.99434	Up	0.00361975	0.0205102	9.48454	10.6419	9.63146	11.3195	10.8746	9.20413	7.04205	8.79674	8.26557	7.04205
4.39_153.0552m/z	153.055	4.39228	neg	1,2-Cyclohexanedicarboxylic acid	205397	HMDB0250649		Organic acids and derivatives	Carboxylic acids and derivatives	Dicarboxylic acids and derivatives	M-H2O-H	C8H12O4	-3.29764	8.48909	8.56364	1.82341	9.4551	7.28318	2.17192	4.50623	Up	0.00115834	0.00966658	8.88073	8.90046	10.2265	10.4801	8.78775	7.04205	8.24771	7.04205	7.04205	7.04205
13.37_413.2009m/z	413.201	13.3687	neg	3-(2-Phenylethenyl)hepta-2,4,6-trienenitrile	211384	HMDB0257743		Benzenoids	Benzene and substituted derivatives	Styrenes	2M-H	C15H13N	-3.32166	13.1101	12.3445	1.82244	12.0875	14.0916	-2.00403	0.249303	Down	3.91255e-05	0.00100046	12.2011	12.2923	12.3211	11.2715	12.3518	13.579	14.346	14.0562	14.2212	14.2555
4.89_172.0975m/z	172.097	4.88523	neg	Hexanoylglycine	47168	HMDB0000701		Organic acids and derivatives	Carboxylic acids and derivatives	Amino acids, peptides, and analogues	M-H	C8H15NO3	-2.67223	12.1435	11.9808	1.82065	11.5026	13.6735	-2.17084	0.222081	Down	0.00128391	0.0103256	11.9747	11.0451	11.5826	10.8683	12.0424	12.4657	13.1918	13.9221	14.1745	14.6133
4.71_434.1615m/z	434.162	4.70722	neg	7-(3,5-Dimethyl-1,2-Oxazol-4-Yl)-6-Methoxy-2-Methyl-4-(Quinolin-4-Yl)-9h-Pyrimido[4,5-B]indole	204630	HMDB0249738		Organoheterocyclic compounds	Quinolines and derivatives	Unclassified	M-H	C26H21N5O2	-1.67139	10.0097	10.5776	1.82002	10.3523	8.14006	2.21224	4.63393	Up	0.00175857	0.0126395	10.0838	9.98564	10.5215	10.8284	10.3421	7.04205	9.15937	8.83762	7.04205	8.61922
7.33_310.0760m/z	310.076	7.32973	neg	PharmaGSID_47261	293599			Organic acids and derivatives	Carboxylic acids and derivatives	Amino acids, peptides, and analogues	M+FA-H	C13H15NO3S	2.05975	9.08837	9.59426	1.81262	11.9753	9.85595	2.11934	4.34495	Up	0.000721681	0.00714624	12.13	11.3478	12.5621	12.7207	11.1159	9.22306	10.6005	9.48265	10.0319	9.94161
9.71_257.1897m/z	257.19	9.71457	pos	Exocarpic acid	1041			Lipids and lipid-like molecules	Fatty Acyls	Fatty acids and conjugates	M+H-H2O	C18H26O2	-1.08112	9.99944	9.34794	1.81256	11.573	9.46838	2.10465	4.30094	Up	0.000614084	0.00651484	11.406	11.1588	12.5597	12.187	10.5536	9.0472	9.92213	9.54813	9.46505	9.35938
12.37_573.4876m/z	573.488	12.3742	pos	DG(16:1/18:2/0:0)[iso2]	10544	HMDB0007132	C00165	Lipids and lipid-like molecules	Fatty Acyls	Lineolic acids and derivatives	M+H-H2O	C37H66O5	-0.229163	13.0549	12.3991	1.81215	12.0988	14.1134	-2.01458	0.247486	Down	9.26018e-05	0.00171809	12.4053	12.3811	11.9684	11.6026	12.1368	14.666	14.4114	14.1508	14.0808	13.2581
6.78_404.2663m/z	404.266	6.77742	neg	5-Hydroxydodecanoylcarnitine	197849	HMDB0241303		Lipids and lipid-like molecules	Fatty Acyls	Fatty acid esters	M+FA-H	C19H37NO5	2.58103	10.6502	10.078	1.80663	10.3818	12.4926	-2.11079	0.23152	Down	0.000744173	0.00725796	9.69689	10.9146	10.6367	10.9218	9.73915	12.4466	11.7886	12.0541	13.4575	12.7163
6.04_139.1122m/z	139.112	6.04295	neg	7:0(6Me,6Me)	414			Lipids and lipid-like molecules	Fatty Acyls	Fatty acids and conjugates	M-H2O-H	C9H18O2	-4.2906	7.04205	7.04205	1.80321	8.99543	7.04205	1.95339	3.87283	Up	3.07476e-05	0.000864563	8.85777	8.60975	9.39919	9.66527	8.4452	7.04205	7.04205	7.04205	7.04205	7.04205
12.37_842.6630m/z	842.663	12.3742	pos	PC(20:1/20:1)	18481	HMDB0008308	C00157	Lipids and lipid-like molecules	Glycerophospholipids	Glycerophosphocholines	M+H	C48H92NO8P	-0.432094	15.7956	14.6556	1.80317	14.4069	16.3318	-1.92491	0.263356	Down	8.05429e-06	0.000401607	14.9259	14.4345	14.2888	13.9648	14.4206	16.5832	16.4645	16.2276	16.4371	15.9467
5.41_193.1197m/z	193.12	5.41088	pos	trans-p-Menth-2-ene-1,4-diol	60672	HMDB0037021		Lipids and lipid-like molecules	Prenol lipids	Monoterpenoids	M+Na	C10H18O2	-1.40764	11.5606	11.7475	1.80237	13.6975	11.5852	2.11235	4.32394	Up	0.00102205	0.00892117	13.2946	13.027	14.4837	14.6986	12.9838	11.553	12.219	10.9658	11.6565	11.5316
14.71_431.3132m/z	431.313	14.7116	pos	N-3-hydroxy-13-methyl-hexadecanoyl glycyl-L-serine	8857			Organic acids and derivatives	Carboxylic acids and derivatives	Amino acids, peptides, and analogues	M+H	C22H42N2O6	3.88501	7.04205	8.46224	1.79279	9.98475	7.29215	2.6926	6.46477	Up	0.0335149	0.0966258	8.71564	9.6301	12.2022	12.3337	7.04205	8.29257	7.04205	7.04205	7.04205	7.04205
13.22_798.5380m/z	798.538	13.2194	pos	SQDG(16:0/14:0)	18037			Lipids and lipid-like molecules	Glycerolipids	Glycosylglycerols	M+NH4	C40H76O12S	-2.00623	15.0184	16.6095	1.79098	16.0465	14.0908	1.95573	3.87912	Up	9.3043e-05	0.00171828	15.6984	16.1762	15.8195	15.9798	16.5587	14.7794	14.4442	13.5421	13.8525	13.8358
13.34_744.5653m/z	744.565	13.3368	neg	GlcCer(d16:1/18:0)	40152			Lipids and lipid-like molecules	Fatty Acyls	Fatty acyl glycosides	M+FA-H	C40H77NO8	3.0759	15.5865	11.8369	1.78926	12.8333	14.9566	-2.12325	0.229529	Down	0.00182238	0.0128458	13.6153	13.1567	12.1122	13.0957	12.1866	14.2774	13.8999	15.4846	15.6122	15.5088
12.59_403.1590m/z	403.159	12.5905	neg	3-(1-Hydroxymethyl-1-propenyl)pentanedioic acid	57354	HMDB0033092		Lipids and lipid-like molecules	Fatty Acyls	Fatty acids and conjugates	2M-H	C9H14O5	-4.96106	18.7147	17.9736	1.78686	16.545	18.5667	-2.02168	0.246272	Down	0.000432405	0.00513352	17.3104	16.6815	16.7917	15.4083	16.5334	18.4698	18.2714	18.3369	19.1759	18.5796
5.28_470.2998m/z	470.3	5.27832	neg	Vertilmicin	199116	HMDB0242753		Organic oxygen compounds	Organooxygen compounds	Carbohydrates and carbohydrate conjugates	M-H2O-H	C22H43N5O7	2.83958	7.04205	7.04205	1.77807	7.77982	9.92026	-2.14044	0.22681	Down	0.00270646	0.0165998	8.41243	7.04205	7.04205	7.04205	9.36051	9.72317	9.71966	10.3973	10.1744	9.58673
7.84_203.1040m/z	203.104	7.84362	pos	N-[(2Z)-2-Methoxyiminopropyl]-7H-purin-6-amine	212380	HMDB0258951		Organoheterocyclic compounds	Imidazopyrimidines	Purines and purine derivatives	M+H-H2O	C9H12N6O	0.203512	8.39468	8.66	1.77457	10.7331	8.56405	2.16904	4.49725	Up	0.00300219	0.0180086	10.4059	10.2437	11.6169	11.3673	10.0316	7.04205	9.12571	8.38328	9.13984	9.1294
12.16_449.2797m/z	449.28	12.1644	pos	2-Pyridinemethanamine, N-((4-(1,4,8,11-tetraazacyclotetradec-1-ylmethyl)phenyl)methyl)-	203393	HMDB0248283		Benzenoids	Benzene and substituted derivatives	Phenylmethylamines	M+K	C24H38N6	1.78331	10.1489	7.04205	1.77021	10.9726	8.95498	2.01764	4.0492	Up	0.000771626	0.00741099	10.1158	11.0662	11.427	12.0334	10.2206	8.7252	9.38956	8.94282	8.69936	9.01798
6.63_358.2585m/z	358.258	6.6321	pos	(10E)-8-Hydroxydodec-10-enoylcarnitine	197771	HMDB0241225		Lipids and lipid-like molecules	Fatty Acyls	Fatty acid esters	M+H	C19H35NO5	-0.97497	13.1099	12.2875	1.76936	12.3699	14.3119	-1.94195	0.260265	Down	0.000158163	0.00256391	12.6832	12.7467	12.5427	12.2059	11.6712	14.4879	13.8377	13.7652	14.7508	14.7179
13.09_455.1908m/z	455.191	13.0902	neg	Scorzoside	63853	HMDB0040713		Lipids and lipid-like molecules	Prenol lipids	Terpene lactones	M+FA-H	C21H30O8	-3.62105	14.2745	13.4711	1.76007	12.9034	14.8541	-1.95069	0.258692	Down	0.000376519	0.00469354	13.0942	13.3391	13.1232	11.805	13.1554	14.3994	14.581	14.9911	15.4605	14.8384
5.40_213.1130m/z	213.113	5.39507	neg	(+)-exo-5-hydroxycamphor	35451		C03448	Lipids and lipid-like molecules	Prenol lipids	Monoterpenoids	M+FA-H	C10H16O2	-1.11891	12.2947	12.7578	1.75743	14.6262	12.6281	1.99809	3.9947	Up	0.00088053	0.00805604	14.2832	13.8081	15.5205	15.4861	14.0331	12.4938	13.1062	12.3663	12.4854	12.6888
14.47_351.2523m/z	351.252	14.4675	neg	Sodium octadecanoate	256223	HMDB0303349		Lipids and lipid-like molecules	Fatty Acyls	Fatty acids and conjugates	M+FA-H	C18H35NaO2	2.04785	12.9818	12.3173	1.75694	12.2568	14.0738	-1.81699	0.283812	Down	3.38857e-06	0.000218016	12.4815	12.4677	12.5037	11.8207	12.0106	13.8475	14.2494	14.185	13.9592	14.1281
9.94_273.1846m/z	273.185	9.94487	pos	Athanacalvic acid	1386			Lipids and lipid-like molecules	Fatty Acyls	Fatty acids and conjugates	M+H-H2O	C18H26O3	-0.992026	9.86813	10.3778	1.75269	12.2636	10.2049	2.05868	4.16606	Up	0.00196419	0.0135018	11.9956	11.6324	13.0512	13.2432	11.3955	9.49629	11.0003	9.80402	10.2893	10.4345
9.27_345.2441m/z	345.244	9.26867	neg	Dinorchenodeoxycholic acid	46566			Lipids and lipid-like molecules	Steroids and steroid derivatives	Bile acids, alcohols and derivatives	M-H2O-H	C22H36O4	1.56886	9.56534	9.35658	1.75257	8.16472	10.3048	-2.1401	0.226865	Down	0.00344731	0.0198594	7.04205	8.5913	9.26354	8.88467	7.04205	10.1658	9.52003	10.4677	10.4918	10.8787
8.76_267.1603m/z	267.16	8.75618	neg	Deoxydihydro-artemisinin	82455	HMDB0060570		Organoheterocyclic compounds	Dioxolopyrans	Unclassified	M-H	C15H24O4	0.508256	12.4868	10.7337	1.75209	9.31889	11.6408	-2.32195	0.199996	Down	0.0119023	0.0460508	10.2506	9.09456	11.0819	7.04205	9.12542	11.4097	11.21	12.518	11.558	11.5085
13.34_571.2695m/z	571.269	13.3368	neg	OKHdiA-PA	28069			Lipids and lipid-like molecules	Glycerophospholipids	Glycerophosphates	M-H2O-H	C28H47O11P	2.90357	11.6637	14.0638	1.75122	16.1434	14.2715	1.87195	3.66026	Up	6.46917e-05	0.00138265	16.5053	16.3589	15.6386	16.1578	16.0565	14.7503	14.0956	14.7281	14.0035	13.7799
14.02_333.2804m/z	333.28	14.017	neg	DTrE	899	HMDB0002823		Lipids and lipid-like molecules	Fatty Acyls	Fatty acids and conjugates	M-H	C22H38O2	1.50756	10.9385	11.2341	1.74577	10.5008	12.3896	-1.88887	0.270018	Down	0.000184023	0.00281497	11.313	10.5417	10.3214	9.58544	10.7423	12.3792	12.3779	12.6366	12.2462	12.3084
6.15_272.0966m/z	272.097	6.14797	neg	4-(Methylsulfanyl)-2-oxobutanoylcarnitine	198393	HMDB0241872		Lipids and lipid-like molecules	Fatty Acyls	Fatty acid esters	M-H2O-H	C12H21NO5S	1.52574	7.04205	7.04205	1.7455	9.22722	7.04205	2.18517	4.54782	Up	0.00653171	0.0303671	9.18647	9.323	10.5466	10.038	7.04205	7.04205	7.04205	7.04205	7.04205	7.04205
9.11_462.3211m/z	462.321	9.11462	pos	(23S,25R)-25-hydroxyvitamin D3 26,23-peroxylactone	45293			Lipids and lipid-like molecules	Steroids and steroid derivatives	Vitamin D and derivatives	M+NH4	C27H40O5	-0.618197	12.2388	12.0243	1.73822	11.0685	13.1051	-2.03665	0.24373	Down	0.00185955	0.0129782	10.5651	11.2538	11.8032	11.7871	9.93322	13.112	12.5395	12.5045	13.7589	13.6107
8.03_386.2897m/z	386.29	8.03133	pos	(5E)-8-Hydroxytetradec-5-enoylcarnitine	197909	HMDB0241364		Lipids and lipid-like molecules	Fatty Acyls	Fatty acid esters	M+H	C21H39NO5	-0.996663	13.7366	12.9693	1.73814	13.0091	14.8968	-1.8877	0.270237	Down	0.000233808	0.00329132	13.4326	13.3763	13.2527	12.6921	12.2918	15.0696	14.1876	14.7296	15.2719	15.2253
10.25_291.1952m/z	291.195	10.2544	pos	Berkeleylactone L	7913			Phenylpropanoids and polyketides	Macrolides and analogues	Unclassified	M+Na	C16H28O3	7.86153	7.04205	8.37424	1.73745	10.2889	8.14544	2.14346	4.41821	Up	0.00550016	0.0269535	9.86435	9.99168	10.9103	11.186	9.49218	8.41667	7.04205	9.1598	7.04205	9.06663
7.58_623.2624m/z	623.262	7.58172	neg	Benzyl butyl phthalate	204088	HMDB0249068	C14211	Benzenoids	Benzene and substituted derivatives	Benzoic acids and derivatives	2M-H	C19H20O4	-4.19005	13.3936	14.0943	1.73729	13.4136	11.5311	1.88249	3.68712	Up	0.000194466	0.00291625	13.0165	13.4267	13.4751	13.8708	13.2789	10.8443	11.2091	11.6931	11.5391	12.3698
4.30_203.0017m/z	203.002	4.29833	neg	4-Methylcatechol 1-sulfate	197118	HMDB0240459		Organic acids and derivatives	Organic sulfuric acids and derivatives	Arylsulfates	M-H	C7H8O5S	-1.12443	7.04205	7.04205	1.73645	9.32809	7.04205	2.28604	4.87715	Up	0.0116349	0.0452126	11.2404	10.0152	8.68752	9.65531	7.04205	7.04205	7.04205	7.04205	7.04205	7.04205
4.33_129.0550m/z	129.055	4.33473	neg	4-Methyl-2-oxopentanoic acid	47163	HMDB0000695	C00233	Organic acids and derivatives	Keto acids and derivatives	Short-chain keto acids and derivatives	M-H	C6H10O3	-5.78552	13.1055	13.4477	1.73417	14.3119	12.4658	1.84612	3.59531	Up	7.08502e-05	0.00143463	14.3901	14.0874	13.6205	14.4982	14.9632	12.3306	12.1204	12.5531	12.6203	12.7043
5.54_285.0680m/z	285.068	5.54318	pos	Prolyl-Methionine	54036	HMDB0029023		Organic acids and derivatives	Carboxylic acids and derivatives	Amino acids, peptides, and analogues	M+K	C10H18N2O3S	4.10708	8.80643	8.91575	1.73279	10.8853	8.95	1.93533	3.82464	Up	0.000725699	0.00714769	10.3059	10.8917	11.552	11.6267	10.0503	8.28085	9.34647	9.01366	9.00102	9.108
12.71_483.1965m/z	483.197	12.7071	neg	1-Ethoxy-N-(3-morpholin-4-yloxadiazol-3-ium-5-yl)methanimidate	201102	HMDB0245703		Organoheterocyclic compounds	Oxazinanes	Morpholines	2M-H	C9H14N4O4	1.60688	13.6558	12.4021	1.72919	12.471	14.2363	-1.76525	0.294175	Down	4.46342e-06	0.000258037	12.6722	12.5013	12.5486	12.6198	12.0133	14.2735	14.5422	14.3616	14.1157	13.8885
4.02_337.0550m/z	337.055	4.01653	neg	1H-Imidazole-4-carboxamide, 5-amino-1-(5-O-phosphono-beta-D-ribofuranosyl)-	203223	HMDB0248071		Nucleosides, nucleotides, and analogues	Imidazole ribonucleosides and ribonucleotides	1-ribosyl-imidazolecarboxamides	M-H	C9H15N4O8P	-1.31621	8.87265	7.04205	1.7275	10.2562	7.8105	2.44566	5.44775	Up	0.0266458	0.0820773	11.5485	10.3265	10.5431	8.60778	10.255	7.04205	10.8843	7.04205	7.04205	7.04205
1.83_279.0991m/z	279.099	1.825	neg	5-Methoxy-DL-tryptophan	289987			Organoheterocyclic compounds	Indoles and derivatives	Tryptamines and derivatives	M+FA-H	C12H14N2O3	1.90036	7.04205	7.04205	1.72543	9.3375	7.31365	2.02385	4.06668	Up	0.00224143	0.0147299	8.48549	8.89563	9.1383	10.6549	9.51314	7.04205	7.04205	8.40006	7.04205	7.04205
8.88_273.1846m/z	273.185	8.88452	pos	Alpha-Estradiol	44866	HMDB0000429	C02537	Lipids and lipid-like molecules	Steroids and steroid derivatives	Estrane steroids	M+H	C18H24O2	-1.14314	10.4988	11.0173	1.72491	12.0292	10.0248	2.00434	4.01206	Up	0.00228606	0.0149248	11.6399	11.4469	12.9898	12.9518	11.1174	9.60103	10.6607	9.40808	10.1661	10.2881
3.81_217.1081m/z	217.108	3.80905	neg	9-oxo-nonanoic acid	2157	HMDB0094711	C16322	Lipids and lipid-like molecules	Fatty Acyls	Fatty acids and conjugates	M+FA-H	C9H16O3	-0.412321	9.99092	10.254	1.72304	11.7358	9.82712	1.90864	3.75455	Up	0.000747307	0.00727075	11.7098	11.1402	12.6019	12.2833	10.9437	9.64759	10.3193	9.34582	9.73602	10.0869
5.75_179.0710m/z	179.071	5.7524	neg	10-hydroxy-(2E,8E)-decadien-4-ynoic Acid	83780	HMDB0062773		Lipids and lipid-like molecules	Fatty Acyls	Fatty acids and conjugates	M-H	C10H12O3	-2.28358	7.04205	7.04205	1.72302	9.71947	7.64941	2.07005	4.19902	Up	0.00384173	0.0212842	9.33093	8.94492	10.4945	10.6583	9.16866	7.04205	8.54609	7.04205	8.57484	7.04205
5.41_237.1095m/z	237.11	5.41088	pos	2-Carboxy-5,7-dimethyl-4-octanolide	55674	HMDB0030986		Organoheterocyclic compounds	Lactones	Gamma butyrolactones	M+Na	C11H18O4	-1.03493	14.8715	15.0637	1.72095	16.8476	14.9329	1.91463	3.77016	Up	0.000857902	0.0079217	16.4668	16.2901	17.5146	17.79	16.1763	14.8139	15.4817	14.4966	14.9727	14.8998
12.51_529.4258m/z	529.426	12.5074	neg	DG(13:0/18:3/0:0)[iso2]	10875			Lipids and lipid-like molecules	Fatty Acyls	Lineolic acids and derivatives	M-H2O-H	C34H60O5	-0.841489	10.289	12.6981	1.71476	11.7447	9.75577	1.9889	3.96934	Up	0.001861	0.0129782	12.0155	12.2087	11.396	10.6099	12.4933	9.37153	8.9777	9.75935	10.0807	10.5896
12.95_455.2117m/z	455.212	12.9532	neg	Risperidone	48457	HMDB0005020	C06861	Organoheterocyclic compounds	Pyridopyrimidines	Unclassified	M+FA-H	C23H27FN4O2	4.23857	12.3293	11.1319	1.71394	9.98378	12.019	-2.03518	0.243978	Down	0.00400808	0.0219411	9.84662	11.1316	9.48304	8.81467	10.643	11.612	11.1007	12.8306	12.3679	12.1836
12.59_507.1967m/z	507.197	12.5905	neg	5-Oxo-prolyl-glycyl-arginine-4-nitroanilide	205029	HMDB0250211		Organic acids and derivatives	Carboxylic acids and derivatives	Amino acids, peptides, and analogues	M+FA-H	C19H26N8O6	1.98622	15.0697	14.2452	1.71362	13.5112	15.2888	-1.77762	0.291663	Down	4.99538e-05	0.00116742	14.0994	13.6852	13.5777	12.8035	13.3901	15.3814	15.3041	15.1536	15.5279	15.0771
4.29_258.1700m/z	258.17	4.2857	pos	2-Hexenoylcarnitine	8313	HMDB0013161		Lipids and lipid-like molecules	Fatty Acyls	Fatty acid esters	M+H	C13H23NO4	-0.0759877	10.5157	9.61617	1.71357	9.87253	11.6546	-1.78206	0.290768	Down	4.08354e-05	0.00101808	9.76272	9.90946	10.3019	9.94191	9.44665	11.8304	11.53	11.0405	12.0005	11.8714
4.72_303.2043n	304.212	4.7236	pos	4-Hydroxy-2-propylpentanoylcarnitine	198422	HMDB0241901		Lipids and lipid-like molecules	Fatty Acyls	Fatty acid esters	M+H, M+Na	C15H29NO5	-0.892697	14.4292	13.4025	1.70419	13.5588	15.2923	-1.73352	0.300717	Down	1.50711e-05	0.000595233	13.7951	13.8276	13.7229	13.2561	13.1923	15.4256	15.043	14.945	15.6034	15.4446
9.18_347.1459m/z	347.146	9.18493	neg	Azetirelin	203837	HMDB0248799		Organic acids and derivatives	Carboxylic acids and derivatives	Amino acids, peptides, and analogues	M-H	C15H20N6O4	-4.12646	9.63726	11.6034	1.70073	10.5505	8.67898	1.87151	3.65916	Up	0.000571401	0.00624471	10.7484	10.9913	9.96681	9.72652	11.3194	8.60453	8.44695	9.01385	9.04987	8.27968
13.53_400.1487m/z	400.149	13.532	neg	Setoperone	211819	HMDB0258263		Organic oxygen compounds	Organooxygen compounds	Carbonyl compounds	M-H	C21H24FN3O2S	-3.42549	15.1207	14.8243	1.70038	13.8881	15.6804	-1.79236	0.288699	Down	0.000184293	0.00281497	14.2265	13.9971	13.7187	13.4939	14.004	15.9932	15.8911	15.8531	15.9541	14.7104
15.06_153.0769m/z	153.077	15.0563	pos	Hydrazino nicotinamide	207604	HMDB0253239		Organoheterocyclic compounds	Pyridines and derivatives	Pyridinecarboxylic acids and derivatives	M+H	C6H8N4O	-1.07147	12.9981	10.9927	1.70023	14.5503	12.1898	2.36055	5.13565	Up	0.0234984	0.0745111	13.1663	15.6812	12.0834	15.6495	16.1711	12.0821	11.5476	12.1184	12.1428	13.0579
11.39_490.2975m/z	490.297	11.3945	neg	N-Docosahexaenoyl Tyrosine	198530	HMDB0242024		Organic acids and derivatives	Carboxylic acids and derivatives	Amino acids, peptides, and analogues	M-H	C31H41NO4	2.42408	9.5621	9.02192	1.69964	8.44347	10.6077	-2.16423	0.223101	Down	0.0118089	0.045778	9.90014	7.04205	8.92562	7.04205	9.30747	9.48977	11.0483	10.7966	11.2226	10.4813
8.05_500.2855m/z	500.285	8.04783	neg	Fexofenadine	48462	HMDB0005030	C06999	Benzenoids	Benzene and substituted derivatives	Diphenylmethanes	M-H	C32H39NO4	9.66506	11.8268	11.0719	1.69896	10.9818	12.7434	-1.76158	0.294925	Down	7.89286e-05	0.0015664	10.8803	11.2983	11.0293	10.7183	10.9829	12.7944	12.0337	12.515	13.114	13.2598
10.61_477.2476m/z	477.248	10.6092	neg	Emorfazone	206364	HMDB0251777		Organic nitrogen compounds	Organonitrogen compounds	Amines	2M-H	C11H17N3O3	1.77959	7.04205	9.84656	1.69734	10.8911	13.3619	-2.47089	0.18038	Down	0.040065	0.11073	12.0652	12.0014	7.04205	10.9728	12.3738	13.209	12.6695	13.676	13.5925	13.6628
5.71_239.1251m/z	239.125	5.70728	pos	Decarbamoylsaxitoxin	61719	HMDB0038319		Phenylpropanoids and polyketides	Saxitoxins, gonyautoxins, and derivatives	Unclassified	M+H-H2O	C9H16N6O3	-0.191781	10.3162	10.217	1.69593	11.9438	10.118	1.82578	3.54499	Up	0.000452269	0.0053025	11.6962	11.7174	12.6069	12.6089	11.0898	9.79772	10.4676	9.91675	10.3544	10.0538
8.54_388.3054m/z	388.305	8.54187	pos	3-hydroxytetradecanoylcarnitine	8327	HMDB0061640		Lipids and lipid-like molecules	Fatty Acyls	Fatty acid esters	M+H	C21H41NO5	-0.933642	15.5388	15.3392	1.69526	15.0951	16.8176	-1.7225	0.303023	Down	2.22253e-05	0.000726694	15.0346	15.4954	15.1224	14.9844	14.8387	16.8158	16.3664	16.565	17.0964	17.2443
9.90_364.2115m/z	364.212	9.90245	pos	Royleanonic acid	211033	HMDB0257320		Lipids and lipid-like molecules	Steroids and steroid derivatives	Oxosteroids	M+NH4	C20H26O5	-0.981663	7.04205	8.98905	1.69514	11.1724	9.26484	1.9076	3.75185	Up	0.00176948	0.0126723	10.9231	10.5321	12.0146	12.06	10.3325	9.41894	9.61591	8.53798	9.18328	9.56807
10.33_800.5477m/z	800.548	10.327	neg	PC(P-16:0/18:3-OH)	242613	HMDB0289513		Lipids and lipid-like molecules	Glycerophospholipids	Glycerophosphocholines	M+FA-H	C42H78NO8P	4.01135	16.8649	15.3344	1.69428	15.9962	14.2466	1.74961	3.36267	Up	6.54175e-05	0.00138803	16.4485	16.1981	15.9985	16.0545	15.2813	13.829	14.573	14.162	14.2728	14.3962
4.37_522.2906m/z	522.291	4.36972	pos	(3S,7E,9R)-4,7-Megastigmadiene-3,9-diol 9-[apiosyl-(1->6)-glucoside]	54657	HMDB0029766		Lipids and lipid-like molecules	Fatty Acyls	Fatty acyl glycosides	M+NH4	C24H40O11	-0.512014	10.126	10.6189	1.69357	11.4388	9.60363	1.83514	3.56806	Up	0.000583689	0.00632699	11.3177	11.2809	11.1069	11.5283	11.96	10.568	9.87422	9.48631	9.33423	8.75539
4.73_297.0961m/z	297.096	4.72607	neg	Amdoxovir	203394	HMDB0248284		Organoheterocyclic compounds	Imidazopyrimidines	Purines and purine derivatives	M+FA-H	C9H12N6O3	3.22039	9.48274	9.86653	1.69257	10.8463	8.90073	1.94559	3.85196	Up	0.00269905	0.0165894	10.4349	10.2533	11.7811	11.7344	10.0279	8.36521	9.44883	8.29422	8.92003	9.47537
6.04_485.0640m/z	485.064	6.04295	neg	2-(Methylthio)-3H-phenoxazin-3-one	59804	HMDB0035996		Organoheterocyclic compounds	Benzoxazines	Phenoxazines	2M-H	C13H9NO2S	1.06419	8.49075	10.1029	1.69257	10.8375	8.85603	1.98151	3.94907	Up	0.00377188	0.0210478	10.515	9.66224	11.303	11.9297	10.7777	8.41404	9.93251	8.44108	8.31103	9.18148
9.51_416.3368m/z	416.337	9.50647	pos	13-Hydroxyhexadecanoylcarnitine	198011	HMDB0241467		Lipids and lipid-like molecules	Fatty Acyls	Fatty acid esters	M+H	C23H45NO5	-0.656691	16.1584	15.9052	1.69202	15.5399	17.2629	-1.72301	0.302916	Down	3.49156e-05	0.000919576	15.6501	16.0856	15.2542	15.3831	15.3263	17.0787	17.0368	16.9761	17.6073	17.6155
9.87_307.1533m/z	307.153	9.87355	neg	Homosalate	207579	HMDB0253209		Benzenoids	Benzene and substituted derivatives	Benzoic acids and derivatives	M+FA-H	C16H22O3	-6.89208	11.2186	10.3925	1.69115	10.0252	11.9432	-1.91797	0.264626	Down	0.00216634	0.0144025	10.0483	9.7564	9.65196	9.84465	10.8246	11.6104	10.8018	11.7577	12.6672	12.8787
9.23_313.1771m/z	313.177	9.23003	pos	Momilactone B	60424	HMDB0036749		Organoheterocyclic compounds	Naphthopyrans	Unclassified	M+H-H2O	C20H26O4	-8.16338	10.7094	9.84784	1.69115	12.0805	10.1324	1.94811	3.85869	Up	0.00266409	0.0164738	11.9134	11.7838	12.7484	12.8986	11.0582	9.22157	10.7457	9.61911	10.369	10.7064
7.97_267.1969m/z	267.197	7.97232	neg	Farnesol	35465	HMDB0004305	C01126	Lipids and lipid-like molecules	Prenol lipids	Sesquiterpenoids	M+FA-H	C15H26O	1.41672	10.4715	10.396	1.68848	9.83635	11.6291	-1.79274	0.288623	Down	0.000284344	0.00381902	9.89078	10.1609	9.83428	10.1863	9.10956	11.7456	10.957	11.3219	11.9432	12.1778
13.39_431.1906m/z	431.191	13.3886	neg	Rivenprost	210971	HMDB0257249		Benzenoids	Benzene and substituted derivatives	Benzylethers	M-H2O-H	C24H34O6S	1.73911	16.7305	16.7515	1.68678	15.7312	17.4545	-1.72325	0.302866	Down	5.25647e-05	0.00119818	16.0643	15.3642	16.0917	15.0966	16.0394	17.255	17.5213	17.3769	17.6851	17.4341
1.26_389.1261m/z	389.126	1.26218	neg	True blue	212699	HMDB0259305		Organoheterocyclic compounds	Benzofurans	Unclassified	M+FA-H	C20H16N4O2	1.62933	11.5784	11.8468	1.68422	11.6418	9.89013	1.75167	3.36748	Up	0.0001667	0.00265987	11.8972	11.5534	12.2774	11.1817	11.2994	9.99697	9.83796	10.1903	9.24947	10.176
10.73_483.3128m/z	483.313	10.7254	neg	Ganodecalone B	43731			Lipids and lipid-like molecules	Prenol lipids	Triterpenoids	M+FA-H	C29H42O3	2.71799	10.384	10.6014	1.6836	10.2271	12.1814	-1.95431	0.258045	Down	0.0030783	0.0183001	9.62374	10.969	10.4202	8.85702	11.2653	12.1904	12.5505	12.3859	12.1313	11.6487
9.40_370.2950m/z	370.295	9.39933	pos	Tetradecenoylcarnitine	212321	HMDB0258884		Lipids and lipid-like molecules	Fatty Acyls	Fatty acids and conjugates	M+H	C21H39NO4	-0.611756	12.7649	11.6053	1.6823	11.7339	13.4936	-1.75969	0.295312	Down	0.000214498	0.00313418	11.8755	12.2955	11.6031	11.634	11.2615	13.4731	12.7391	13.4302	13.9916	13.834
11.16_337.2002m/z	337.2	11.1591	neg	8-hydroxy-10,12-octadecadiynoic acid	3148			Lipids and lipid-like molecules	Fatty Acyls	Fatty acids and conjugates	M+FA-H	C18H28O3	-6.27493	9.95703	9.93658	1.68142	8.90847	10.7593	-1.85081	0.277236	Down	0.00108078	0.00929142	8.31427	9.26543	9.4009	9.0022	8.55955	9.87889	10.2793	10.7983	11.2977	11.5423
5.29_295.0804m/z	295.08	5.28617	neg	1,8-Naphthyridine, 2-fluoro-	206877	HMDB0252386		Organoheterocyclic compounds	Diazanaphthalenes	Naphthyridines	2M-H	C8H5FN2	1.01181	10.4752	10.4625	1.68131	12.5848	10.7737	1.81107	3.50904	Up	0.000580858	0.00631835	12.3469	12.0427	13.2786	13.4061	11.8495	10.4936	10.8397	10.7633	10.9902	10.7817
4.51_255.0852m/z	255.085	4.50885	neg	6-hydroxy-2-hexynoic acid	1825			Lipids and lipid-like molecules	Fatty Acyls	Fatty acids and conjugates	2M-H	C6H8O3	-8.46663	7.04205	7.04205	1.67674	9.19535	7.34736	1.84799	3.59999	Up	0.00139879	0.0109194	9.14341	8.80179	9.73042	9.73488	8.56626	8.5686	7.04205	7.04205	7.04205	7.04205
4.09_197.0428m/z	197.043	4.09125	neg	8-Azaguanine	202655	HMDB0247422		Organoheterocyclic compounds	Triazolopyrimidines	Unclassified	M+FA-H	C4H4N6O	-0.117664	10.9272	11.5295	1.67643	12.3063	10.5127	1.79363	3.46686	Up	0.000357832	0.00453141	12.0495	12.3139	11.804	12.5083	12.856	9.89121	10.0722	10.5057	11.1683	10.9262
15.31_82.0530m/z	82.053	15.3127	pos	1-Methylimidazole	199474	HMDB0243940		Organoheterocyclic compounds	Azoles	Imidazoles	M+	C4H6N2	-1.44725	12.544	11.1143	1.67554	13.692	11.5714	2.12055	4.34859	Up	0.0111703	0.0439539	12.5571	14.4073	11.9709	14.5924	14.9323	11.6392	10.9462	11.3291	11.487	12.4557
9.67_324.1934n	347.183	9.67362	pos	Dinor-PGD2	3815			Lipids and lipid-like molecules	Fatty Acyls	Eicosanoids	M+NH4, M+Na, M+H	C18H28O5	-0.701207	12.1215	11.6975	1.67063	13.6692	11.8116	1.85762	3.62409	Up	0.00177616	0.0126973	13.3947	13.2108	14.776	14.3472	12.6171	11.7925	12.124	11.5405	11.9134	11.6874
8.98_484.3294m/z	484.329	8.97773	neg	(9Z,12Z)-6-Hydroxyoctadeca-9,12-dienoylcarnitine	198084	HMDB0241543		Lipids and lipid-like molecules	Fatty Acyls	Fatty acid esters	M+FA-H	C25H45NO5	3.29499	12.4869	12.481	1.67053	11.8571	13.5352	-1.67811	0.312492	Down	3.52708e-05	0.000919578	11.9051	11.9305	11.7176	12.1993	11.533	13.3061	13.0914	13.4141	13.913	13.9514
1.08_192.0265n	191.019	1.07693	neg	Citric Acid	46867	HMDB0000094	C00158	Organic acids and derivatives	Carboxylic acids and derivatives	Tricarboxylic acids and derivatives	M-H2O-H, M-H	C6H8O7	-2.52702	19.7107	19.7069	1.66962	20.24	18.4849	1.75519	3.3757	Up	0.000228486	0.00327852	20.8306	19.8456	20.5728	20.0915	19.8597	18.2379	17.8798	18.7843	18.9763	18.5459
12.73_455.1926m/z	455.193	12.7274	neg	19-Monoacetyl cincassiol A	255460	HMDB0302510		Lipids and lipid-like molecules	Prenol lipids	Terpene lactones	M+FA-H	C21H30O8	0.879761	16.0844	15.3917	1.66945	14.8265	16.5636	-1.73712	0.299967	Down	0.000234328	0.00329132	15.5134	15.0259	14.5846	14.0376	14.9709	16.6784	16.5055	16.9841	16.364	16.2859
7.37_384.2742m/z	384.274	7.36977	pos	O-(13-carboxytridecanoyl)carnitine	8366	HMDB0240776		Lipids and lipid-like molecules	Fatty Acyls	Fatty acid esters	M+H-H2O	C21H39NO6	-0.697177	12.8822	11.9443	1.66748	12.292	14.0974	-1.80539	0.286103	Down	0.00078525	0.0074758	12.6878	12.6153	12.3423	12.6038	11.211	14.0604	13.7097	13.6245	14.3615	14.731
3.74_178.1338m/z	178.134	3.73775	pos	2-Propylbenzimidazole	257883			Organoheterocyclic compounds	Benzimidazoles	Unclassified	M+NH4	C10H12N2	-0.385309	12.212	12.2867	1.66694	10.5762	12.6763	-2.10008	0.233246	Down	0.0107048	0.0428038	10.3992	9.63486	10.1962	10.1366	12.5142	13.287	13.2075	12.7301	11.1649	12.9919
8.05_243.1967m/z	243.197	8.04783	neg	tridecanal	6539	HMDB0030928		Lipids and lipid-like molecules	Fatty Acyls	Fatty aldehydes	M+FA-H	C13H26O	0.644086	12.3862	11.9538	1.66587	11.9493	13.6131	-1.66387	0.315592	Down	2.80887e-05	0.000842451	11.926	12.2111	11.8222	11.7651	12.0219	13.5116	13.0973	13.4239	13.9721	14.0609
12.40_480.1993m/z	480.199	12.4039	neg	2-(4-(2-Carboxyethyl)phenethylamino)-5'-N-ethylcarboxamidoadenosine	204742	HMDB0249866		Nucleosides, nucleotides, and analogues	Purine nucleosides	Unclassified	M-H2O-H	C23H29N7O6	-1.544	14.3129	13.313	1.66073	12.7566	14.5644	-1.80787	0.285612	Down	0.00113428	0.00952555	13.8407	12.6613	12.857	11.8031	12.6207	15.0751	14.3091	14.5772	14.7417	14.1192
10.73_522.2850m/z	522.285	10.7254	neg	PE(18:2/0:0)	21172	HMDB0011507		Lipids and lipid-like molecules	Glycerophospholipids	Glycerophosphoethanolamines	M+FA-H	C23H44NO7P	2.54266	13.9178	12.7606	1.65893	12.9229	14.5686	-1.64572	0.319587	Down	2.00943e-05	0.000697012	13.1951	13.1122	13.0054	13.0403	12.2614	14.6054	14.2957	14.6697	14.7372	14.535
12.59_697.4453m/z	697.445	12.5905	neg	PA(P-16:0/18:4)	25990			Lipids and lipid-like molecules	Glycerophospholipids	Glycerophosphates	M+FA-H	C37H65O7P	0.484001	14.5193	14.1939	1.65865	12.3495	14.4309	-2.08134	0.236295	Down	0.0122343	0.047016	13.5177	12.538	12.9008	9.89666	12.8945	14.4888	14.2711	14.1314	14.8943	14.3687
9.61_466.3528m/z	466.353	9.60902	pos	3alpha,7alpha,12alpha-Trihydroxy-5beta-cholest-23-en-26-oic acid	46388			Lipids and lipid-like molecules	Steroids and steroid derivatives	Cholestane steroids	M+NH4	C27H44O5	0.228672	10.8639	11.4371	1.65786	10.5102	12.1351	-1.62485	0.324244	Down	5.96031e-06	0.000312838	10.5718	10.7514	10.2952	10.6763	10.2563	12.2369	11.9061	11.8059	12.3136	12.4128
7.87_181.1221m/z	181.122	7.87412	pos	Dihydroactinidiolide	59127	HMDB0035240		Organoheterocyclic compounds	Benzofurans	Unclassified	M+H	C11H16O2	-1.12079	16.8807	17.0453	1.65425	18.6985	16.9434	1.75507	3.37543	Up	0.000651496	0.00675018	18.3796	18.1167	19.5227	19.3293	18.1442	16.6074	17.2862	16.7388	17.0125	17.0721
4.05_360.1107m/z	360.111	4.05413	neg	1-[(4-Aminophenyl)methyl]-3-(3-nitrophenyl)imidazo[4,5-b]pyridin-2-one	213240	HMDB0260034		Organoheterocyclic compounds	Azoles	Imidazoles	M-H	C19H15N5O3	1.25323	7.04205	7.04205	1.65277	9.19107	7.04205	2.14903	4.43528	Up	0.0189305	0.0642249	9.07137	8.23678	10.8516	10.7536	7.04205	7.04205	7.04205	7.04205	7.04205	7.04205
3.73_235.1188m/z	235.119	3.72538	neg	2-Hydroxy-3-methylbutanoic acid	1944	HMDB0000407		Lipids and lipid-like molecules	Fatty Acyls	Fatty acids and conjugates	2M-H	C5H10O3	0.238751	7.04205	7.04205	1.64778	8.94266	7.04205	1.90061	3.73372	Up	0.00432361	0.0229959	9.26963	9.26369	9.39869	9.73926	7.04205	7.04205	7.04205	7.04205	7.04205	7.04205
11.20_289.1795m/z	289.179	11.2024	pos	8R,9R-epoxy-17-octadecen-4,6-diynoic acid	2260			Lipids and lipid-like molecules	Fatty Acyls	Fatty acids and conjugates	M+H	C18H24O3	-1.11843	8.71705	8.53232	1.64767	10.9372	9.21445	1.72276	3.30067	Up	0.000435142	0.00513545	10.6958	10.4752	11.2834	11.7867	10.4449	8.74624	9.62919	9.05493	9.25666	9.38526
4.22_312.1571m/z	312.157	4.21522	neg	Carbuterol	204575	HMDB0249665		Benzenoids	Benzene and substituted derivatives	N-phenylureas	M+FA-H	C13H21N3O3	2.14067	7.04205	7.04205	1.64757	9.50438	7.31101	2.19337	4.57372	Up	0.0205826	0.0676309	9.02009	10.1731	7.04205	11.2884	9.99818	7.04205	7.04205	8.38687	7.04205	7.04205
5.29_223.0951m/z	223.095	5.28617	neg	2,6-Diamino-9-(2-hydroxyethoxymethyl)purine	202284	HMDB0246998		Organoheterocyclic compounds	Imidazopyrimidines	Purines and purine derivatives	M-H	C8H12N6O2	1.09084	10.3104	10.198	1.64504	12.3632	10.6075	1.75566	3.37681	Up	0.000805871	0.00754606	12.1706	11.7272	13.0301	13.1936	11.6945	10.2545	10.5488	10.5892	10.9259	10.7193
14.46_493.1838m/z	493.184	14.4589	neg	1,3-Benzenedicarbonitrile, 2-[[4-[[2-(acetyloxy)ethyl]butylamino]-2-methylphenyl]azo]-5-nitro-	202835	HMDB0247629		Organoheterocyclic compounds	Azobenzenes	Unclassified	M+FA-H	C23H24N6O4	-0.683122	13.5222	12.3895	1.64471	12.6344	14.23	-1.59555	0.330896	Down	4.89031e-06	0.000270937	13.0166	12.7985	12.7221	12.2715	12.3635	14.0664	14.3763	14.27	14.1754	14.2618
5.38_327.0787m/z	327.079	5.37503	pos	N-Acetyl-1-aspartylglutamic acid	209410	HMDB0255414	C12270	Organic acids and derivatives	Carboxylic acids and derivatives	Amino acids, peptides, and analogues	M+Na	C11H16N2O8	-4.03629	9.66909	9.23099	1.64428	10.935	9.05218	1.88278	3.68784	Up	0.00413864	0.0223397	10.562	10.139	11.7888	12.0005	10.1846	8.47184	9.97087	9.12704	8.71513	8.97604
6.04_369.2066m/z	369.207	6.03722	neg	Etonogestrel	52682	HMDB0014439		Lipids and lipid-like molecules	Steroids and steroid derivatives	Estrane steroids	M+FA-H	C22H28O2	-1.67786	10.7094	11.121	1.63906	10.8446	8.84466	1.99993	3.9998	Up	0.00904565	0.0379764	10.0251	10.8311	10.9941	11.1535	11.2192	7.04205	8.63523	8.79039	9.39529	10.3603
9.62_253.2176m/z	253.218	9.6221	neg	Cadinene	56614	HMDB0032182		Lipids and lipid-like molecules	Prenol lipids	Sesquiterpenoids	M+FA-H	C15H28	1.27422	8.54858	8.95332	1.63312	8.01545	9.84441	-1.82896	0.281468	Down	0.00311558	0.0184351	8.47611	8.86041	7.04205	8.65664	7.04205	9.63873	9.4546	9.60365	10.3346	10.1905
9.59_490.3526m/z	490.353	9.58833	pos	(17alpha,23S)-Epoxy-28,29-dihydroxy-27-norlanost-8-ene-3,24-dione	59482	HMDB0035624		Lipids and lipid-like molecules	Prenol lipids	Triterpenoids	M+NH4	C29H44O5	-0.22057	12.0065	12.1862	1.63227	11.0298	12.6708	-1.64094	0.320647	Down	0.000118472	0.00206369	10.9531	11.0003	11.456	10.508	11.2319	12.6754	12.1145	12.5176	12.8964	13.1501
1.09_349.0548m/z	349.055	1.09393	pos	5-formamido-1-(5-phospho-D-ribosyl)imidazole-4-carboxamide(2-)	83741	HMDB0062708		Nucleosides, nucleotides, and analogues	Imidazole ribonucleosides and ribonucleotides	1-ribosyl-imidazolecarboxamides	M+H-H2O	C10H15N4O9P	1.13108	11.804	12.0029	1.62823	14.0704	12.2349	1.83555	3.56906	Up	0.00304141	0.018162	13.7571	14.6275	13.119	14.0156	14.8328	11.5295	12.5129	11.4521	12.946	12.7337
9.38_554.3328m/z	554.333	9.37638	neg	Cholylthreonine	198891	HMDB0242443		Lipids and lipid-like molecules	Steroids and steroid derivatives	Bile acids, alcohols and derivatives	M+FA-H	C28H47NO7	-1.35207	12.2137	12.7554	1.62753	11.9699	13.6121	-1.64219	0.320371	Down	0.000180325	0.00280062	12.2568	12.2354	12.1526	11.7282	11.4767	13.318	13.0992	13.5325	13.9461	14.1649
11.10_171.1167m/z	171.117	11.0973	pos	1-H-Inden-1-one,2,3-dihydro-3,3,5,6-tetramethyl	81755	HMDB0059683		Benzenoids	Indanes	Indanones	M+H-H2O	C13H16O	-0.7266	8.75055	8.23101	1.62725	10.5113	8.79947	1.71185	3.27581	Up	0.000904829	0.0081845	10.3	10.1688	11.11	11.2532	9.72468	8.77746	9.39862	8.40253	8.6346	8.78413
5.29_363.0682m/z	363.068	5.28617	neg	Resorcinolnaphthalein	274639			Organoheterocyclic compounds	Benzopyrans	1-benzopyrans	M-H2O-H	C24H14O5	4.89379	9.8	9.91614	1.62664	11.854	10.1091	1.74481	3.35152	Up	0.00126483	0.0102328	11.5784	11.2704	12.5749	12.7666	11.0795	9.81844	10.0755	10.0326	10.4564	10.1628
12.95_481.2088m/z	481.209	12.9532	neg	TEMANOGREL	212242	HMDB0258797		Benzenoids	Benzene and substituted derivatives	Anilides	M+FA-H	C24H28N4O4	-0.956762	10.5429	9.61004	1.62606	8.42643	10.4741	-2.04771	0.241868	Down	0.0163209	0.0575123	7.04205	9.75165	7.04205	8.40138	9.89505	9.97116	9.79958	10.4914	11.1215	10.9871
8.62_356.2795m/z	356.279	8.61598	pos	(+-)-Zoapatanol	198715	HMDB0242237		Lipids and lipid-like molecules	Prenol lipids	Monoterpenoids	M+NH4	C20H34O4	-0.211859	10.8312	10.2541	1.62599	9.91857	11.4888	-1.57025	0.336749	Down	6.09927e-06	0.000315974	9.5946	10.1318	9.89574	10.08	9.89073	11.8614	11.3408	11.2063	11.3923	11.6433
12.75_465.2246m/z	465.225	12.7474	neg	Dolichyl b-D-glucosyl phosphate	47367	HMDB0001054	C01246	Lipids and lipid-like molecules	Prenol lipids	Sesquiterpenoids	M-H	C21H39O9P	-2.74046	15.3531	14.8026	1.62574	14.47	16.0694	-1.5994	0.330013	Down	4.66524e-05	0.00111435	15.0079	14.5925	14.4792	13.9823	14.2879	16.0927	16.3408	16.1984	16.028	15.687
4.90_175.0971m/z	175.097	4.90232	neg	Isobutyric acid	166	HMDB0001873	C02632	Organic acids and derivatives	Carboxylic acids and derivatives	Carboxylic acids	2M-H	C4H8O2	-2.51775	8.52229	9.26206	1.62334	10.3502	8.64645	1.70378	3.25752	Up	0.000626629	0.00657796	11.0404	10.8129	10.0563	10.2151	9.62653	8.31347	8.90482	9.20223	8.56597	8.24578
4.06_240.9790m/z	240.979	4.06388	neg	3,5-Dihydroxycinnamic acid sulfate	197108	HMDB0240449		Phenylpropanoids and polyketides	Cinnamic acids and derivatives	Hydroxycinnamic acids and derivatives	M-H2O-H	C9H8O7S	-8.58611	11.9216	11.9532	1.62056	13.3894	11.465	1.92435	3.79567	Up	0.00834376	0.036099	13.7216	12.7856	14.1972	12.2164	14.0263	11.2681	12.9614	10.9691	11.4917	10.635
0.74_371.0574m/z	371.057	0.741617	pos	2-Oxoquazepam	200722	HMDB0245286		Organoheterocyclic compounds	Benzodiazepines	1,4-benzodiazepines	M+H	C17H11ClF4N2O	1.40667	9.0844	7.04205	1.62032	11.4731	13.3741	-1.90099	0.267759	Down	0.00797296	0.0349634	11.6737	11.9057	9.56962	12.0663	12.1501	12.4281	13.4562	13.4699	13.717	13.799
5.16_174.1852m/z	174.185	5.1627	pos	Capraldehyde	6517	HMDB0011623	C12307	Organic oxygen compounds	Organooxygen compounds	Carbonyl compounds	M+NH4	C10H20O	-0.57574	10.344	10.1706	1.61751	7.87047	10.0761	-2.20558	0.216797	Down	0.0326717	0.0947836	9.8899	7.04205	7.04205	7.04205	8.3363	11.8847	9.07315	8.40641	11.1548	9.86117
11.46_961.6301m/z	961.63	11.4564	neg	PE(0:0/18:0)	21199	HMDB0011129		Lipids and lipid-like molecules	Glycerophospholipids	Glycerophosphoethanolamines	2M-H	C23H48NO7P	3.87057	13.2929	11.8096	1.61678	12.7432	14.3172	-1.57405	0.335863	Down	2.00089e-05	0.000697012	12.822	12.5557	12.7836	13.0634	12.491	14.5881	14.6588	14.2749	13.8572	14.2071
6.28_349.2371m/z	349.237	6.2826	pos	alpha-Cortolone	45093	HMDB0003128	C05481	Lipids and lipid-like molecules	Steroids and steroid derivatives	Hydroxysteroids	M+H-H2O	C21H34O5	-0.552079	9.98651	8.52738	1.61354	9.39816	11.4108	-2.01267	0.247814	Down	0.0149274	0.0538871	9.90686	10.0764	9.75963	10.2058	7.04205	10.697	11.1356	11.1488	12.0842	11.9886
12.40_813.4331m/z	813.433	12.3984	neg	PGP(18:1-O/i-14:0)	228154	HMDB0275052		Lipids and lipid-like molecules	Glycerophospholipids	Glycerophosphoglycerophosphates	M-H	C38H72O14P2	0.761692	15.7905	15.4088	1.61125	14.4578	16.1365	-1.67867	0.312371	Down	0.000815067	0.00761429	15.484	14.4441	14.3891	13.8624	14.1096	16.5385	15.6986	16.4625	16.1381	15.8449
12.17_423.1484m/z	423.148	12.1693	neg	cortisol 21-sulfate	46683	HMDB0062779	C02822	Lipids and lipid-like molecules	Steroids and steroid derivatives	Sulfated steroids	M-H2O-H	C21H30O8S	0.205598	8.45351	9.5747	1.60952	7.57428	9.2955	-1.72122	0.303293	Down	0.00166252	0.0121684	7.04205	8.39347	7.04205	7.04205	8.35178	9.39255	9.04181	9.34151	9.87171	8.82991
4.08_257.9693m/z	257.969	4.07733	neg	1-hydroxy-2-methyl-2-(E)-butenyl 4-diphosphate	256843	HMDB0304014		Lipids and lipid-like molecules	Prenol lipids	Isoprenoid phosphates	M-H	C5H9O8P2-3	-2.69295	13.0509	13.1789	1.60872	14.5194	12.6538	1.86557	3.64411	Up	0.00669179	0.0307955	14.7057	14.0923	15.2187	13.4363	15.1439	12.5272	14.0496	12.123	12.7829	11.7864
12.49_164.0209m/z	164.021	12.4866	neg	8-Oxoguanine	64868	HMDB0041820	C20155	Organoheterocyclic compounds	Imidazopyrimidines	Purines and purine derivatives	M-H	C5H3N5O2	-3.3144	8.46806	9.69915	1.60651	9.19638	7.53165	1.66473	3.17055	Up	0.000607091	0.0064659	9.07526	9.11867	9.20739	9.17549	9.4051	7.04205	8.23537	7.04205	8.29674	7.04205
11.65_511.3062m/z	511.306	11.6479	neg	(-)-Fumigaclavine B	55026	HMDB0030201		Alkaloids and derivatives	Ergoline and derivatives	Clavines and derivatives	2M-H	C16H20N2O	-3.12385	15.8243	16.506	1.605	16.3729	14.8439	1.52901	2.88588	Up	1.13477e-05	0.000508607	16.3219	16.2742	16.6975	16.1369	16.4339	14.7209	14.6973	14.6732	14.7759	15.3519
12.07_380.2426m/z	380.243	12.0655	neg	3-Hydroxytetradeca-6,8,10-trienoylcarnitine	197956	HMDB0241411		Lipids and lipid-like molecules	Fatty Acyls	Fatty acid esters	M-H	C21H35NO5	-4.24822	10.2306	10.1217	1.60446	9.74585	11.3381	-1.59229	0.331645	Down	0.000173367	0.00273622	9.83324	10.1909	9.73173	9.25689	9.71652	10.5978	11.5929	11.6518	11.4255	11.4226
12.21_325.1330m/z	325.133	12.213	neg	1-Dodecanesulfonic acid, 1-hydroxy-3-oxo-	199403	HMDB0243866		Organic oxygen compounds	Organooxygen compounds	Carbonyl compounds	M+FA-H	C12H24O5S	1.36	8.87764	8.79273	1.60404	8.46477	10.2174	-1.75262	0.296762	Down	0.00259334	0.0162145	8.4431	9.41747	8.63187	7.04205	8.78935	9.98096	10.06	10.0958	10.5724	10.3778
9.25_363.1798m/z	363.18	9.24802	neg	Blumealactone A	60345	HMDB0036665		Lipids and lipid-like molecules	Prenol lipids	Terpene lactones	M-H	C20H28O6	-4.10137	7.04205	7.04205	1.60265	8.59619	10.5883	-1.99206	0.251379	Down	0.0164643	0.0577118	9.29832	9.66348	7.04205	7.04205	9.93505	10.6307	11.0261	10.3687	10.731	10.1847
11.10_275.2003m/z	275.2	11.0973	pos	5Z,8Z,11Z,14Z,17Z-octadecapentaenoic acid	3303			Lipids and lipid-like molecules	Fatty Acyls	Lineolic acids and derivatives	M+H	C18H26O2	-0.769508	14.1093	13.781	1.60225	15.8144	14.1023	1.71209	3.27634	Up	0.00183236	0.0128458	15.6464	15.3274	16.495	16.6395	14.9639	13.7809	14.7695	13.7437	14.0946	14.123
4.06_172.9909m/z	172.991	4.06388	neg	Phenol sulphate	82031	HMDB0060015	C02180	Organic acids and derivatives	Organic sulfuric acids and derivatives	Arylsulfates	M-H	C6H6O4S	-3.06476	16.3363	16.4103	1.60197	17.8283	15.9766	1.85161	3.60903	Up	0.00680466	0.0310815	18.0272	17.3747	18.5825	16.7204	18.4365	15.789	17.3677	15.4579	16.0549	15.2138
4.90_281.1147m/z	281.115	4.90232	neg	N-Acetyl-5-methoxykynuramine	83619	HMDB0062497		Organic oxygen compounds	Organooxygen compounds	Carbonyl compounds	M+FA-H	C12H16N2O3	1.81602	9.16145	7.04205	1.60073	9.30261	7.27994	2.02267	4.06336	Up	0.0175687	0.0608	10.1633	9.87712	8.83404	10.5965	7.04205	7.04205	7.04205	8.23152	7.04205	7.04205
13.73_409.3310m/z	409.331	13.7262	pos	Stearoylcholine	197264	HMDB0240648		Organic nitrogen compounds	Organonitrogen compounds	Quaternary ammonium salts	M+K	C23H48NO2+	-1.7918	9.29974	9.61799	1.59852	11.5861	9.83634	1.74977	3.36306	Up	0.00317031	0.0185976	11.5503	10.7335	12.3455	12.5464	10.7548	9.65428	10.4647	9.48092	9.61214	9.9697
7.24_347.2214m/z	347.221	7.24207	pos	Corticosterone	45055	HMDB0001547	C02140	Lipids and lipid-like molecules	Steroids and steroid derivatives	Hydroxysteroids	M+H	C21H30O4	-0.842622	14.6581	12.0829	1.59783	13.2602	14.8708	-1.61053	0.327477	Down	0.000345754	0.00443477	13.3661	13.7195	12.9364	13.7779	12.5013	14.9528	14.634	14.6635	15.3047	14.7989
12.79_341.1431m/z	341.143	12.7874	neg	2,9-Dimethyl-4,7-diphenyl-1,10-phenanthroline	200955	HMDB0245527		Organoheterocyclic compounds	Quinolines and derivatives	Phenylquinolines	M-H2O-H	C26H20N2	-4.70663	12.3745	11.6984	1.5971	11.2963	12.827	-1.53064	0.346124	Down	2.51401e-05	0.000777196	11.8065	11.3555	11.3753	10.9929	10.9516	12.6811	13.1028	12.9503	12.7405	12.6603
9.84_386.3262m/z	386.326	9.84053	pos	4-Methyltetradecanoylcarnitine	197395	HMDB0240839		Lipids and lipid-like molecules	Fatty Acyls	Fatty acid esters	M+H	C22H43NO4	-0.771802	13.0863	12.584	1.59558	12.5557	14.0577	-1.50198	0.35307	Down	5.88303e-06	0.000312838	12.6367	12.8519	12.6708	12.3968	12.2225	13.9489	13.9067	13.9567	14.4045	14.0718
12.34_415.1591m/z	415.159	12.3375	neg	Sayaendoside	534725			Organic oxygen compounds	Organooxygen compounds	Carbohydrates and carbohydrate conjugates	M-H	C19H28O10	-4.54637	10.7891	11.1193	1.59417	9.74874	11.478	-1.72923	0.301614	Down	0.00277409	0.0169203	10.5641	10.4074	9.16038	8.65332	9.95846	11.541	11.6596	11.7551	11.6425	10.7916
14.34_447.3087m/z	447.309	14.336	pos	Unoprostone isopropyl ester	267552			Lipids and lipid-like molecules	Fatty Acyls	Eicosanoids	M+Na	C25H44O5	1.33842	8.46549	9.02659	1.59309	10.8211	9.0242	1.79688	3.47469	Up	0.00497141	0.0251025	10.5439	10.3455	11.6974	11.8641	9.6545	8.22934	9.10386	9.40849	9.07358	9.30571
5.77_332.2428m/z	332.243	5.77403	pos	7-Hydroxydecanoylcarnitine	197612	HMDB0241056		Lipids and lipid-like molecules	Fatty Acyls	Fatty acid esters	M+H	C17H33NO5	-1.0411	14.185	13.3805	1.59305	13.651	15.2298	-1.5788	0.334759	Down	0.000202787	0.00299599	13.957	14.0604	13.5091	13.5539	13.1746	15.2799	14.7679	14.8428	15.6719	15.5866
0.69_401.0700m/z	401.07	0.6901	neg	5-Amino-6-(5'-phosphoribitylamino)uracil	48173	HMDB0003841	C04454	Organic oxygen compounds	Organooxygen compounds	Carbohydrates and carbohydrate conjugates	M+FA-H	C9H17N4O9P	-4.25305	11.5627	9.52873	1.59251	12.8409	14.6159	-1.77499	0.292195	Down	0.00438298	0.0231732	12.7828	12.8457	11.7656	13.0869	13.7232	13.7019	14.8996	15.0433	14.0205	15.414
11.71_398.2708m/z	398.271	11.7082	neg	Laurdan	208213	HMDB0253991		Benzenoids	Benzene and substituted derivatives	Butyrophenones	M+FA-H	C24H35NO	1.98869	9.07723	9.36507	1.59038	8.59984	10.3299	-1.73006	0.30144	Down	0.00266785	0.0164738	8.83267	9.24802	9.02932	7.04205	8.84712	10.1182	10.3954	10.2124	10.3742	10.5492
12.64_575.5032m/z	575.503	12.6398	pos	DG(18:2/16:0/0:0)	49092	HMDB0007243		Lipids and lipid-like molecules	Fatty Acyls	Lineolic acids and derivatives	M+H-H2O	C37H68O5	-0.316517	15.0252	13.6307	1.59035	13.7469	15.304	-1.55714	0.339823	Down	0.000110586	0.0019519	14.3049	14.1007	13.645	13.2635	13.4202	15.5911	15.4341	15.2946	15.1857	15.0145
10.63_267.1967m/z	267.197	10.6315	neg	Humulol	61641	HMDB0038213		Lipids and lipid-like molecules	Prenol lipids	Sesquiterpenoids	M+FA-H	C15H26O	0.708353	12.2021	11.4013	1.58759	11.3881	13.1528	-1.76468	0.294293	Down	0.00457089	0.0239282	11.3003	11.5239	10.9455	11.5259	11.6448	13.0203	11.8298	12.7151	13.9493	14.2494
4.09_214.0332m/z	214.033	4.09125	neg	Monosodium glutamate	256208	HMDB0303331		Organic acids and derivatives	Carboxylic acids and derivatives	Amino acids, peptides, and analogues	M+FA-H	C5H8NNaO4	-0.549799	10.5768	11.2127	1.58632	11.9943	10.4002	1.59413	3.01913	Up	0.000283245	0.0038171	11.6909	12.0685	11.5578	12.184	12.4703	9.9762	9.97418	10.3394	10.9715	10.7396
7.58_241.1810m/z	241.181	7.58172	neg	Dihydrogeranylacetone	64575	HMDB0041490		Lipids and lipid-like molecules	Prenol lipids	Monoterpenoids	M+FA-H	C13H24O	0.453054	10.8468	10.5697	1.58629	10.4517	12.0206	-1.56886	0.337075	Down	0.00023287	0.00329132	10.6321	10.5503	10.5623	10.4046	10.1093	12.0941	11.2175	11.8658	12.4863	12.4392
4.38_605.3323m/z	605.332	4.37878	neg	Aditoprim	203180	HMDB0248017		Benzenoids	Benzene and substituted derivatives	Methoxybenzenes	2M-H	C15H21N5O2	0.826352	8.58556	9.15964	1.58596	8.9134	10.7925	-1.87909	0.271854	Down	0.0106951	0.0428038	8.78088	9.70598	8.77458	7.04205	10.2635	10.8726	10.7434	11.1767	10.9109	10.2589
5.53_316.1018m/z	316.102	5.5306	neg	3-(4,5-Dimethylthiazol-2-yl)-2,5-diphenyl-2,3-dihydro-1H-tetrazole	211617	HMDB0258022		Organoheterocyclic compounds	Azoles	Thiazoles	M-H2O-H	C18H17N5S	-2.39612	9.72012	9.92243	1.58534	11.617	9.91222	1.70475	3.25972	Up	0.00245266	0.0156039	11.5155	10.9755	12.5064	12.1339	10.9536	9.15758	10.6747	9.9433	9.8606	9.92488
13.34_374.1328m/z	374.133	13.3368	neg	Haloperidol	52849	HMDB0014645	C01814	Organic oxygen compounds	Organooxygen compounds	Carbonyl compounds	M-H	C21H23ClFNO2	-0.0616791	15.5277	14.8956	1.58473	14.7044	16.2371	-1.53275	0.345617	Down	6.28719e-05	0.00137047	15.055	14.7435	14.9694	14.1309	14.6231	16.6198	16.3173	16.2507	16.0888	15.909
4.25_242.9972m/z	242.997	4.25205	neg	p-Coumaric acid sulfate	144381	HMDB0125166		Phenylpropanoids and polyketides	Cinnamic acids and derivatives	Cinnamic acids	M-H	C9H8O6S	1.14904	7.04205	7.04205	1.58181	9.30716	7.04205	2.26511	4.8069	Up	0.0484592	0.127593	11.6571	11.0319	7.04205	9.76277	7.04205	7.04205	7.04205	7.04205	7.04205	7.04205
4.06_308.9668m/z	308.967	4.06388	neg	thienothiazine	212416	HMDB0258990		Organoheterocyclic compounds	Thienothiazines	Unclassified	2M-H	C6H5NS2	4.47433	10.6821	10.9815	1.58089	12.1856	10.3349	1.85061	3.60653	Up	0.00947205	0.0393174	12.5959	11.5502	12.9653	11.089	12.7274	10.0545	11.8335	9.71971	10.4766	9.59039
12.59_511.1396m/z	511.14	12.5905	neg	Isoliquiritigenin	33587	HMDB0037316	C08650	Phenylpropanoids and polyketides	Linear 1,3-diarylpropanoids	Chalcones and dihydrochalcones	2M-H	C15H12O4	-0.516753	11.8212	11.0791	1.58055	10.3772	11.9991	-1.62192	0.324903	Down	0.000888816	0.00809472	11.0161	9.79785	10.4942	9.68599	10.8918	12.2036	12.2404	12.0079	12.153	11.3907
7.63_265.1408m/z	265.141	7.62527	pos	(+-)-Carbovir	198714	HMDB0242235		Nucleosides, nucleotides, and analogues	Nucleoside and nucleotide analogues	Unclassified	M+NH4	C11H13N5O2	0.0927303	8.65959	7.04205	1.58006	10.1926	8.04267	2.14993	4.43806	Up	0.0413772	0.113038	9.98656	9.41122	11.657	11.5214	8.38688	7.04205	9.96642	7.04205	7.04205	9.12079
6.78_215.1651m/z	215.165	6.77742	neg	10-Undecen-1-ol	6323	HMDB0031016		Lipids and lipid-like molecules	Fatty Acyls	Fatty alcohols	M+FA-H	C11H22O	-0.827394	11.7711	11.1363	1.57814	11.3179	12.9158	-1.59793	0.330351	Down	0.000650499	0.00675018	11.1088	11.4896	11.4952	11.5558	10.9402	12.8732	12.1933	12.6145	13.8149	13.0833
10.81_895.5587m/z	895.559	10.8087	neg	Dihydroxylycopene diglucoside	36791			Lipids and lipid-like molecules	Prenol lipids	Tetraterpenoids	M-H	C52H80O12	1.08924	14.2212	14.017	1.57787	13.7379	15.2337	-1.49583	0.354577	Down	2.62722e-05	0.0008	14.0424	13.933	13.8249	13.4745	13.4148	15.0294	15.437	15.5925	14.9552	15.1545
5.13_423.1275m/z	423.128	5.1258	neg	1-O-E-Cinnamoyl-(6-arabinosylglucose)	55116	HMDB0030294		Phenylpropanoids and polyketides	Cinnamic acids and derivatives	Cinnamic acid esters	M-H2O-H	C20H26O11	-4.8242	7.04205	7.04205	1.57582	8.82083	10.8783	-2.05747	0.240236	Down	0.031984	0.0936053	9.86979	9.5223	7.04205	7.04205	10.6279	10.1837	10.4584	11.4271	11.5418	10.7806
3.03_330.0772m/z	330.077	3.03343	neg	S-(Formylmethyl)glutathione	82400	HMDB0060507	C14871	Organic acids and derivatives	Carboxylic acids and derivatives	Amino acids, peptides, and analogues	M-H2O-H	C12H19N3O7S	1.86377	10.9557	12.8698	1.57567	9.21203	7.04205	2.16999	4.50019	Up	0.0420828	0.114196	10.6338	10.2068	11.1355	7.04205	7.04205	7.04205	7.04205	7.04205	7.04205	7.04205
7.89_408.2889n	453.287	7.8898	neg	Beta-Muricholic acid	45930	HMDB0000415	C17726	Lipids and lipid-like molecules	Steroids and steroid derivatives	Bile acids, alcohols and derivatives	M-H, M+FA-H	C24H40O5	3.1898	11.5876	8.61942	1.57454	10.3985	12.3597	-1.96119	0.256816	Down	0.0179921	0.0618177	10.0759	11.0709	12.1613	9.75899	8.92544	11.573	13.1695	12.699	12.9027	11.4543
5.29_431.0558m/z	431.056	5.28617	neg	Lithol Rubine	64647	HMDB0041567		Benzenoids	Naphthalenes	Naphthalenecarboxylic acids and derivatives	M+FA-H	C18H14N2O6S	0.839116	9.75103	8.86615	1.57387	11.4549	9.78306	1.67183	3.18618	Up	0.00229085	0.0149317	11.1918	10.8727	12.2508	12.2721	10.6869	9.54958	9.71672	9.34699	9.96389	10.3381
10.55_597.3066m/z	597.307	10.551	neg	AGC	266516			Organic acids and derivatives	Carboxylic acids and derivatives	Amino acids, peptides, and analogues	2M-H	C15H25NO3S	4.67935	16.4711	16.8514	1.57325	16.6447	15.007	1.63774	3.11177	Up	0.00110776	0.00940183	16.3232	16.6386	16.7247	16.8202	16.717	14.1795	14.3187	15.4271	15.3314	15.7784
8.14_211.1338m/z	211.134	8.1418	neg	7-oxo-11-Dodecenoic acid	2174			Lipids and lipid-like molecules	Fatty Acyls	Fatty acids and conjugates	M-H	C12H20O3	-0.945268	9.37191	8.93174	1.5722	8.7042	10.3167	-1.61246	0.327039	Down	0.00100722	0.00883037	8.37177	9.01933	8.55543	8.78855	8.78592	10.0311	9.61485	9.88179	10.9043	11.1512
5.29_155.1072m/z	155.107	5.28617	neg	(1R,2R,4R,5S)-(+)-p-Menthane-2,5-diol	254973	HMDB0301947		Organic oxygen compounds	Organooxygen compounds	Alcohols and polyols	M-H2O-H	C9H18O3	-3.38724	11.2467	11.273	1.57176	13.2237	11.6159	1.60784	3.04796	Up	0.000942475	0.00846741	13.0005	12.6637	13.8725	14.0539	12.5281	11.4903	11.6019	11.5674	11.7478	11.6721
3.69_252.0372m/z	252.037	3.68988	neg	2-Amino-4-hydroxy-6-pteridinecarboxylic acid	57396	HMDB0033136		Organoheterocyclic compounds	Pteridines and derivatives	Pterins and derivatives	M+FA-H	C7H5N5O3	-1.32464	7.04205	7.04205	1.56952	7.44722	9.56853	-2.12131	0.229838	Down	0.0390958	0.109058	7.04205	7.04205	9.0679	7.04205	7.04205	7.04205	10.9623	10.3216	10.8941	8.6226
9.14_528.3172m/z	528.317	9.14367	neg	Tumonoic Acid H	274758			Organic acids and derivatives	Peptidomimetics	Depsipeptides	M+FA-H	C26H45NO7	-1.33478	12.7406	12.8871	1.56764	12.4368	13.9386	-1.5018	0.353111	Down	9.41872e-05	0.00172399	12.4904	12.7031	12.5214	12.4921	11.9771	13.6632	13.5177	13.8532	14.4119	14.247
13.24_572.3685m/z	572.369	13.2402	pos	PC(P-18:0/2:0)	19694			Lipids and lipid-like molecules	Glycerophospholipids	Glycerophosphocholines	M+Na	C28H56NO7P	-0.210085	14.1715	14.8953	1.5666	14.6813	13.1449	1.53637	2.90064	Up	0.000198189	0.00293895	14.653	14.5341	14.497	15.0868	14.6353	12.5884	12.9715	12.8785	13.5957	13.6904
11.50_384.2553m/z	384.255	11.4981	neg	(Z)-1-Methyl-2-(tridec-8-en-1-yl)quinolin-4(1H)-one	206652	HMDB0252136		Organoheterocyclic compounds	Quinolines and derivatives	Quinolones and derivatives	M+FA-H	C23H33NO	2.6534	12.6442	12.2435	1.56554	11.7788	13.3543	-1.57547	0.335534	Down	0.000678612	0.00685411	11.7795	12.0055	12.004	10.9554	12.1498	12.5783	13.5199	13.3743	13.5917	13.7073
4.43_226.1437m/z	226.144	4.43057	pos	N-(3-hydroxy-octanoyl)-homoserine lactone	8998			Organic acids and derivatives	Carboxylic acids and derivatives	Amino acids, peptides, and analogues	M+H-H2O	C12H21NO4	-0.313071	9.74372	7.04205	1.56515	8.09751	9.91158	-1.81407	0.284388	Down	0.0084183	0.0363033	8.36022	8.39336	9.64989	7.04205	7.04205	9.3808	9.99234	9.87089	9.79976	10.5141
3.74_188.9860m/z	188.986	3.74275	neg	2,5-Dihydroxybenzenesulfonic Acid	200927	HMDB0245498		Benzenoids	Benzene and substituted derivatives	Benzenesulfonic acids and derivatives	M-H	C6H6O5S	-1.82632	14.13	14.0099	1.56465	15.7599	13.8126	1.94726	3.85642	Up	0.0217557	0.0707281	16.6411	15.6451	16.1646	16.4232	13.9254	14.9069	14.9184	12.6574	13.6974	12.883
11.27_518.2878m/z	518.288	11.2653	neg	POB-PE	27905			Lipids and lipid-like molecules	Glycerophospholipids	Glycerophosphoethanolamines	M-H2O-H	C25H48NO9P	-1.9728	11.4466	9.61623	1.56149	10.4961	11.9258	-1.4297	0.371208	Down	1.37842e-06	0.000128973	10.4348	10.563	10.4361	10.4638	10.5828	12.1449	12.1718	11.616	11.9374	11.7588
13.75_135.0804m/z	135.08	13.7471	pos	Indan-5-ol	300515			Benzenoids	Indanes	Unclassified	M+H	C9H10O	-0.418813	10.0857	10.2977	1.55858	11.9792	10.3657	1.61345	3.05984	Up	0.00165538	0.0121622	11.79	11.4712	12.6665	12.7112	11.257	9.9605	10.8677	10.021	10.3811	10.5984
9.35_440.3368m/z	440.337	9.34893	pos	(12Z,15Z)-10-Hydroxyoctadeca-12,15-dienoylcarnitine	198086	HMDB0241545		Lipids and lipid-like molecules	Fatty Acyls	Fatty acid esters	M+H	C25H45NO5	-0.643652	15.1087	14.7034	1.55779	14.3265	15.8294	-1.50291	0.352841	Down	0.000170316	0.00270674	14.4289	14.647	14.1821	14.4326	13.9417	15.6082	15.3934	15.572	16.1823	16.3911
15.06_154.0610m/z	154.061	15.0563	pos	2,6-Dihydroxy-3-cyanopyridine	200943	HMDB0245515		Organoheterocyclic compounds	Pyridines and derivatives	3-pyridinecarbonitriles	M+NH4	C6H4N2O2	-0.746928	14.8885	13.9085	1.55737	16.1823	14.2535	1.9288	3.80739	Up	0.018736	0.0637152	14.8785	16.9394	14.5237	17.142	17.4278	14.5845	13.3763	14.2063	14.3766	14.7236
15.31_72.0687m/z	72.0687	15.3127	pos	Acetone hydrazone	203092	HMDB0247911		Organic nitrogen compounds	Organonitrogen compounds	Hydrazines and derivatives	M+	C3H8N2	-0.716066	12.996	12.117	1.55679	14.1505	12.2913	1.8592	3.62807	Up	0.013075	0.0488353	12.9285	14.6798	12.8226	15.1059	15.2159	12.5542	11.3599	12.2278	12.484	12.8307
10.73_192.1513n	193.159	10.7267	pos	(E)-5,8-Megastigmadien-4-one	58662	HMDB0034671		Organic oxygen compounds	Organooxygen compounds	Carbonyl compounds	M+H-H2O, M+H	C13H20O	-0.623752	13.4151	13.5698	1.55392	15.1425	13.5466	1.5959	3.02282	Up	0.00148549	0.0113518	14.9157	14.583	15.8316	15.8921	14.4902	13.283	14.0355	13.182	13.6049	13.6277
4.42_845.3990m/z	845.399	4.42258	pos	PGP(a-13:0/20:4+=O)	227416	HMDB0274314		Lipids and lipid-like molecules	Glycerophospholipids	Glycerophosphoglycerophosphates	M+Na	C39H68O14P2	1.60994	12.4898	12.6397	1.5533	12.3611	10.7513	1.6098	3.05209	Up	0.00170051	0.0123558	11.8235	12.7352	12.9116	11.5941	12.7411	10.9309	11.1753	10.8194	10.9237	9.90716
15.31_100.0634m/z	100.063	15.3127	pos	Gyromitrin	58099	HMDB0033952	C08305	Organic nitrogen compounds	Organonitrogen compounds	Hydrazines and derivatives	M+	C4H8N2O	-2.80086	15.3829	14.5666	1.5497	16.6111	14.7945	1.81653	3.52232	Up	0.0111166	0.0438222	15.4757	17.0338	15.2557	17.5981	17.692	14.8462	14.1584	14.7284	14.9657	15.2741
4.04_130.1591m/z	130.159	4.04467	pos	3-Methyl-3-heptene	83413	HMDB0061909		Hydrocarbons	Unsaturated hydrocarbons	Branched unsaturated hydrocarbons	M+NH4	C8H16	0.498517	13.3154	15.5616	1.5488	14.3894	12.9856	1.40385	2.64606	Up	2.04458e-06	0.000163117	14.5213	14.5613	14.469	14.3731	14.0226	12.8788	12.9869	13.0165	12.8397	13.206
9.38_486.3451m/z	486.345	9.37638	neg	(12E)-9-Hydroxyoctadecenoylcarnitine	198075	HMDB0241534		Lipids and lipid-like molecules	Fatty Acyls	Fatty acid esters	M+FA-H	C25H47NO5	3.23556	13.5657	13.918	1.54673	13.267	14.7411	-1.47413	0.359952	Down	0.000148094	0.0024411	13.4004	13.3756	13.2861	13.2001	13.0726	14.4537	14.1891	14.6046	15.1775	15.2806
10.40_315.2317m/z	315.232	10.3983	pos	20-oxo-22,23,24,25,26,27-hexanorvitamin D3 / 20-oxo-22,23,24,25,26,27-hexanorcholecalciferol	45174			Lipids and lipid-like molecules	Steroids and steroid derivatives	Vitamin D and derivatives	M+H	C21H30O2	-0.565292	11.4707	10.3943	1.54667	11.654	13.188	-1.53402	0.345314	Down	0.000686456	0.00689435	12.0859	12.209	11.1149	11.5857	11.2743	12.6399	12.9579	13.1528	13.4821	13.7072
10.77_430.3092n	429.302	10.7668	neg	25-Hydroxyvitamin D3-26,23-lactol	82111	HMDB0060127		Lipids and lipid-like molecules	Steroids and steroid derivatives	Vitamin D and derivatives	M-H, M+FA-H	C27H42O4	2.0797	13.2661	14.0989	1.54536	14.0154	12.5576	1.45786	2.74701	Up	6.96076e-05	0.00143463	14.5769	14.2078	13.6344	13.8861	13.7719	12.9177	12.5375	12.4076	12.5419	12.3832
11.98_693.4139m/z	693.414	11.9811	neg	S-4-benzyl-3-((S)-3-hydroxy-2,2-dimethyloctanoyl)oxazolidin-2-one	274774			Organoheterocyclic compounds	Azolidines	Oxazolidines	2M-H	C20H29NO4	2.65656	12.0528	12.3082	1.54425	10.0894	11.79	-1.70054	0.30767	Down	0.00561146	0.0272977	10.978	10.5793	10.7021	8.72783	9.45999	11.6994	11.6386	11.4687	12.3557	11.7875
10.97_659.1674m/z	659.167	10.9724	neg	4-(Dipropylsulfamoyl)-2-nitrobenzoic acid	200702	HMDB0245264		Benzenoids	Benzene and substituted derivatives	Benzoic acids and derivatives	2M-H	C13H18N2O6S	-3.72761	12.7553	12.3803	1.54396	11.4617	13.1343	-1.67258	0.313692	Down	0.00347101	0.0199508	11.6643	11.2336	12.3222	11.7937	10.295	13.3092	13.3736	13.2905	12.2327	13.4656
6.04_583.3505m/z	583.35	6.03722	neg	Carteolol	52862	HMDB0014662	C06874	Organoheterocyclic compounds	Quinolines and derivatives	Hydroquinolines	2M-H	C16H24N2O3	0.633873	8.90149	9.89046	1.54378	11.7143	10.1092	1.60509	3.04215	Up	0.00232592	0.0151356	11.6927	11.3568	12.3934	11.7581	11.3702	9.60692	11.0942	9.31962	10.0698	10.4553
5.70_197.1181m/z	197.118	5.69918	neg	2,4-decadienal	6522			Organic oxygen compounds	Organooxygen compounds	Carbonyl compounds	M+FA-H	C10H16O	-1.49457	8.25679	7.04205	1.5402	9.91465	8.0626	1.85205	3.61013	Up	0.0172865	0.0599617	9.38678	9.2327	10.9897	11.005	8.95912	7.04205	9.05517	7.04205	8.73708	8.43663
9.14_460.3294m/z	460.329	9.14367	neg	11-Hydroxyhexadecanoylcarnitine	198009	HMDB0241465		Lipids and lipid-like molecules	Fatty Acyls	Fatty acid esters	M+FA-H	C23H45NO5	3.37558	13.7997	13.713	1.53924	13.4772	14.8999	-1.42263	0.373031	Down	3.03958e-05	0.000864563	13.3964	13.8355	13.5254	13.4091	13.2198	14.632	14.6193	14.8144	15.2686	15.1651
4.78_174.1124m/z	174.112	4.77537	pos	N-Acetylisoleucine	83272	HMDB0061684		Organic acids and derivatives	Carboxylic acids and derivatives	Amino acids, peptides, and analogues	M+H	C8H15NO3	-0.491788	9.46476	9.26367	1.53915	8.80289	10.3702	-1.56731	0.337436	Down	0.00144616	0.0111475	9.29136	9.36358	8.27678	8.5098	8.57295	10.274	10.0963	9.64636	10.9545	10.8799
8.45_412.3055m/z	412.305	8.4466	pos	(6,12)-11-Hydroxyhexadecadienoylcarnitine	198029	HMDB0241486		Lipids and lipid-like molecules	Fatty Acyls	Fatty acid esters	M+H	C23H41NO5	-0.722411	13.6806	13.4172	1.5385	13.048	14.5705	-1.52251	0.348081	Down	0.000592877	0.00639616	13.1159	13.2034	13.1054	13.0314	12.7841	14.6758	14.0014	13.9356	14.8912	15.3485
10.95_631.4709m/z	631.471	10.9533	pos	trans-1,4-Bis[[1-cyclohexyl-3-(4-dimethylamino phenyl)ureido]methyl]cyclohexane	209744	HMDB0255813		Benzenoids	Benzene and substituted derivatives	N-phenylureas	M+H	C38H58N6O2	2.39865	7.04205	8.64795	1.53836	11.4946	9.39555	2.09909	4.2844	Up	0.0435036	0.117254	11.2262	12.2047	10.5718	13.0768	10.3938	7.04205	11.2062	10.4654	8.88967	9.37446
12.45_664.3826m/z	664.383	12.4463	neg	PHODiA-PC	27833			Lipids and lipid-like molecules	Glycerophospholipids	Glycerophosphocholines	M-H	C32H60NO11P	-0.816164	13.8763	14.3088	1.53823	12.4725	14.3304	-1.85788	0.275882	Down	0.0177575	0.0612225	13.3123	13.0956	12.8829	10.114	12.958	14.7953	14.2101	14.4026	14.581	13.6631
15.31_113.0711m/z	113.071	15.3127	pos	(2S,4R)-4-Aminopyrrolidine-2-carboxylic acid	200208	HMDB0244734		Organic acids and derivatives	Carboxylic acids and derivatives	Amino acids, peptides, and analogues	M+H-H2O	C5H10N2O2	0.992052	18.0741	16.5261	1.53768	19.2627	17.3694	1.89326	3.71474	Up	0.0197277	0.0660184	18.1154	20.0756	17.5153	20.0683	20.5387	17.3561	16.5942	17.312	17.4588	18.126
9.87_239.1653m/z	239.165	9.87355	neg	7,8-Dehydro-3,4-dihydro-beta-ionol	59973	HMDB0036184		Lipids and lipid-like molecules	Prenol lipids	Sesquiterpenoids	M+FA-H	C13H22O	0.419499	13.211	12.2375	1.53655	12.1881	13.8303	-1.64221	0.320364	Down	0.0041679	0.0224369	12.0132	12.0739	11.815	12.1181	12.9205	13.563	12.7682	13.5064	14.5137	14.8005
11.58_360.2551m/z	360.255	11.5833	neg	N-arachidonoyl glycine	8595	HMDB0005096		Organic acids and derivatives	Carboxylic acids and derivatives	Amino acids, peptides, and analogues	M-H	C22H35NO3	1.79907	11.773	11.1024	1.53607	10.6407	12.3207	-1.67995	0.312093	Down	0.00559159	0.0272439	10.9377	11.0896	10.8116	9.11028	11.2544	11.5426	12.8373	12.1882	12.5252	12.5099
4.02_269.0670m/z	269.067	4.01653	neg	Phenol glucuronide	82030	HMDB0060014		Organic oxygen compounds	Organooxygen compounds	Carbohydrates and carbohydrate conjugates	M-H	C12H14O7	1.34954	10.5693	10.0729	1.53269	12.1412	10.2106	1.93056	3.81204	Up	0.0282402	0.0856057	13.211	12.0572	12.6179	10.7672	12.0525	10.3238	12.4908	9.25361	9.50888	9.47591
13.24_710.4874n	728.521	13.2402	pos	PA(17:2/20:2)	25195			Lipids and lipid-like molecules	Glycerophospholipids	Glycerophosphates	M+NH4, M+Na	C40H71O8P	-1.77252	17.6652	19.9717	1.53236	19.5671	18.1557	1.41143	2.66	Up	2.83029e-05	0.00084254	19.2791	19.8222	19.3732	19.3897	19.9714	18.3543	18.3186	18.0745	18.1886	17.8425
13.49_446.3758n	429.373	13.4931	pos	(20S)-Stigmasta-5-ene-3beta,7alpha,20-triol	44364			Lipids and lipid-like molecules	Steroids and steroid derivatives	Stigmastanes and derivatives	M+H-H2O, M+H	C29H50O3	-0.416043	16.3881	14.0027	1.53124	14.6824	16.1186	-1.43623	0.369532	Down	0.000103232	0.0018466	14.8344	15.3778	14.4053	14.3026	14.492	16.0857	16.0113	16.2394	16.2507	16.0061
4.91_269.1012m/z	269.101	4.91028	neg	Adenine	46837	HMDB0000034	C00147	Organoheterocyclic compounds	Imidazopyrimidines	Purines and purine derivatives	2M-H	C5H5N5	-2.00611	9.15009	8.98333	1.53102	9.9746	8.3368	1.6378	3.11191	Up	0.00487922	0.024889	10.0709	9.83969	10.6847	10.0551	9.22264	8.53091	9.1649	7.04205	8.27402	8.67214
8.06_207.1377m/z	207.138	8.05965	pos	3-Methyl-5-pentyl-2-furanpropanoic acid	132589	HMDB0112084		Lipids and lipid-like molecules	Fatty Acyls	Fatty acids and conjugates	M+H-H2O	C13H20O3	-0.928708	12.3817	12.4163	1.53086	13.9107	12.387	1.52376	2.8754	Up	0.000983486	0.00873286	13.6681	13.3422	14.6626	14.5523	13.3286	12.2415	12.6408	12.2129	12.3925	12.4472
0.77_348.0472n	349.054	0.774633	pos	Glucose-6-phosphate lactate	207225	HMDB0252789		Organic oxygen compounds	Organooxygen compounds	Carbohydrates and carbohydrate conjugates	M+H, M+Na	C9H17O12P	4.05878	13.4022	12.7759	1.53006	14.3056	12.6016	1.70396	3.25794	Up	0.00629026	0.0295546	13.8421	14.9868	13.8983	13.9541	14.8467	11.0765	12.7208	12.8953	13.161	13.1546
10.29_558.2383m/z	558.238	10.286	neg	ZM 447439	267500			Benzenoids	Benzene and substituted derivatives	Anilides	M+FA-H	C29H31N5O4	4.83431	10.1679	8.85834	1.52861	9.22894	10.6365	-1.40753	0.376956	Down	2.47137e-05	0.000771032	9.39872	9.43394	9.22026	9.04399	9.04777	10.7494	10.9653	10.1297	10.7444	10.5936
0.76_146.0923m/z	146.092	0.75615	pos	4-Guanidinobutanoic acid	48113	HMDB0003464	C01035	Organic acids and derivatives	Carboxylic acids and derivatives	Amino acids, peptides, and analogues	M+H	C5H11N3O2	-0.68714	9.85981	9.85466	1.52821	10.189	8.38981	1.7992	3.48028	Up	0.0138283	0.0509807	11.05	11.2094	10.1388	9.54587	9.001	8.49666	7.04205	8.61038	8.36895	9.43102
11.18_550.3152m/z	550.315	11.1794	pos	Aristospan	203666	HMDB0248600		Lipids and lipid-like molecules	Steroids and steroid derivatives	Pregnane steroids	M+NH4	C30H41FO7	-4.19172	12.0221	11.7692	1.52746	10.5391	12.0985	-1.55943	0.339284	Down	0.00162363	0.0120608	11.2038	10.9357	10.6217	9.43411	10.5	12.4532	12.3391	11.7488	12.1697	11.7817
0.72_185.0216m/z	185.022	0.7156	neg	TRIMETHYL PHOSPHATE	212637	HMDB0259237		Organic acids and derivatives	Organic phosphoric acids and derivatives	Phosphate esters	M+FA-H	C3H9O4P	-2.98352	15.1772	15.3332	1.52648	15.3679	13.9435	1.42445	2.68411	Up	9.42163e-05	0.00172399	15.5281	15.5402	15.229	14.9979	15.5443	14.1134	14.5116	13.7711	13.6989	13.6223
15.04_154.0974m/z	154.097	15.0361	pos	N-Acetylhistamine	52232	HMDB0013253	C05135	Organic acids and derivatives	Carboxylic acids and derivatives	Carboxylic acid derivatives	M+H	C7H11N3O	-0.743693	14.2307	12.4025	1.52628	15.5812	13.6113	1.96983	3.91723	Up	0.0309828	0.0917523	14.3713	16.5756	13.4293	16.4655	17.0641	13.4798	12.9681	13.4908	13.5819	14.536
6.69_253.1303m/z	253.13	6.69292	pos	5-(Diethylphosphono)-5-methyl-1-pyrroline N-Oxide	205687	HMDB0251018		Organic acids and derivatives	Organic phosphonic acids and derivatives	Phosphonic acid diesters	M+NH4	C9H18NO4P	-3.64764	8.75775	9.38917	1.51687	11.282	9.67365	1.60831	3.04894	Up	0.00478979	0.0245901	10.9775	10.8653	12.0655	12.1499	10.3516	9.91595	10.15	8.85327	9.67981	9.76919
13.53_379.1802m/z	379.18	13.532	neg	Bisantrene	204241	HMDB0249263		Benzenoids	Anthracenes	Unclassified	M-H2O-H	C22H22N8	3.3659	15.3371	15.7506	1.51526	14.6155	16.0819	-1.4664	0.361884	Down	0.000567634	0.00622058	14.9634	14.7757	14.2086	14.227	14.9029	16.3949	16.3062	16.0965	16.34	15.2719
9.55_372.3106m/z	372.311	9.54702	pos	4-Methyltridecanoylcarnitine	197379	HMDB0240823		Lipids and lipid-like molecules	Fatty Acyls	Fatty acid esters	M+H	C21H41NO4	-0.756925	16.4462	15.9359	1.5148	15.8349	17.269	-1.43408	0.370082	Down	0.000267653	0.0036564	15.9483	16.3605	15.7048	15.6883	15.4726	17.1271	16.7428	17.1577	17.7223	17.595
9.18_279.1582m/z	279.158	9.18493	neg	Prehumulinic acid	54979	HMDB0030148		Organic acids and derivatives	Vinylogous acids	Unclassified	M-H	C16H24O4	-6.96287	11.5039	13.232	1.51273	12.4729	10.9617	1.51121	2.85049	Up	0.00108819	0.00933506	12.5865	12.8195	11.8001	11.974	13.1845	10.6171	10.8912	11.4211	10.6483	11.2308
14.94_98.0483n	99.0556	14.9356	pos	3-Methyl-5-pyrazolone	300037			Organoheterocyclic compounds	Azolines	Pyrazolines	M+, M+H, M+H-H2O	C4H6N2O	2.90092	17.0284	15.3841	1.512	18.1643	16.2831	1.88121	3.68385	Up	0.0249763	0.0780803	17.054	18.9888	16.2593	19.0292	19.4905	16.273	15.5261	16.1282	16.3742	17.1142
12.99_386.1767n	367.159	12.9939	neg	Olamufloxacin	209841	HMDB0255928		Organoheterocyclic compounds	Quinolines and derivatives	Quinoline carboxylic acids	M-H2O-H, M+FA-H	C20H23FN4O3	3.29489	14.4462	13.4207	1.51071	13.0654	14.4808	-1.41546	0.37489	Down	0.000196007	0.00291743	12.9787	13.2001	13.3519	12.4696	13.3264	14.202	14.1887	14.4191	14.9732	14.6211
1.08_325.0174m/z	325.017	1.07693	neg	3-Methylsulfinylpropyl isothiocyanate	48670	HMDB0006095		Organosulfur compounds	Sulfoxides	Unclassified	2M-H	C5H9NOS2	-1.39652	9.28368	7.04205	1.50864	11.3208	13.0089	-1.68808	0.31034	Down	0.0108386	0.0431057	12.2211	11.8226	9.61263	10.9792	11.9687	12.4572	12.8245	13.434	12.8947	13.434
10.93_840.5792m/z	840.579	10.932	neg	PC(PGD1/18:0)	239402	HMDB0286302		Lipids and lipid-like molecules	Fatty Acyls	Eicosanoids	M-H2O-H	C46H86NO11P	3.72397	17.3469	16.7756	1.50795	16.8959	18.3099	-1.41399	0.375273	Down	0.000158758	0.00256391	16.9482	17.0412	16.8322	17.2114	16.4466	18.6568	18.5911	18.4063	18.172	17.7235
1.09_248.1491m/z	248.149	1.09393	pos	3-Hydroxybutyrylcarnitine	52185	HMDB0013127		Lipids and lipid-like molecules	Fatty Acyls	Fatty acid esters	M+H	C11H21NO5	-0.592902	15.1581	14.8896	1.50672	14.6345	16.0171	-1.38256	0.383538	Down	6.96457e-05	0.00143463	14.9247	14.8289	14.9051	14.4031	14.1109	16.0408	15.716	16.0386	16.2741	16.016
15.04_139.0744n	140.082	15.0361	pos	4-Amino-5-hydroxymethyl-2-methylpyrimidine	202575	HMDB0247327	C01279	Organoheterocyclic compounds	Diazines	Pyrimidines and pyrimidine derivatives	M+, M+H	C6H9N3O	-0.968803	18.043	16.3172	1.50669	19.2931	17.4082	1.88491	3.69329	Up	0.0267666	0.0823856	18.1417	20.1828	17.375	20.0844	20.6818	17.3398	16.6272	17.3271	17.4935	18.2535
4.68_259.1781n	260.185	4.67907	pos	4-Methylpentanoylcarnitine	197588	HMDB0241032		Lipids and lipid-like molecules	Fatty Acyls	Fatty acid esters	M+H, M+Na	C13H25NO4	-0.805905	13.8746	13.3434	1.50162	13.2916	14.658	-1.3664	0.387858	Down	5.16949e-05	0.00118512	13.3569	13.7107	13.1015	13.1398	13.149	14.7179	14.3552	14.3435	14.972	14.9014
0.75_378.0982m/z	378.098	0.748717	neg	Norchelerythrine	209670	HMDB0255726	C12226	Organoheterocyclic compounds	Quinolines and derivatives	Benzoquinolines	M+FA-H	C20H15NO4	-0.425329	16.0594	15.9021	1.50086	14.8632	13.4438	1.41935	2.67464	Up	0.000315104	0.0041347	15.0467	14.7875	15.1444	14.4265	14.9106	12.8171	13.8187	13.5687	13.1592	13.8552
13.53_381.1746m/z	381.175	13.532	neg	S-Japonin	59637	HMDB0035802		Lipids and lipid-like molecules	Prenol lipids	Sesquiterpenoids	M+FA-H	C19H28O3S	1.41991	19.8791	20.2758	1.50023	19.1059	20.5462	-1.44028	0.368495	Down	0.00060785	0.0064659	19.4407	19.2385	18.7423	18.71	19.398	20.7971	20.8124	20.6036	20.802	19.7157
10.97_485.3286m/z	485.329	10.9724	neg	Ceanothic acid	60523	HMDB0036851		Lipids and lipid-like molecules	Prenol lipids	Triterpenoids	M-H	C30H46O5	2.82312	9.10767	7.04205	1.50016	9.57307	11.4821	-1.909	0.266277	Down	0.0330914	0.0956532	10.2482	10.4624	9.29663	7.04205	10.816	11.4376	12.5804	11.4629	11.0381	10.8913
14.22_439.1261m/z	439.126	14.219	neg	3-Hydroxynevirapine glucuronide	82607	HMDB0060743		Organic oxygen compounds	Organooxygen compounds	Carbohydrates and carbohydrate conjugates	M-H2O-H	C21H22N4O8	0.487281	16.4451	15.6009	1.49769	15.7876	17.1343	-1.34673	0.393183	Down	2.72127e-05	0.000822358	16.1428	15.6362	15.7834	15.8442	15.5313	17.3721	17.199	17.1602	17.2564	16.6837
14.46_483.1161m/z	483.116	14.4589	neg	Diospyrin	29025			Phenylpropanoids and polyketides	Flavonoids	Flavonoid glycosides	M-H	C21H24O13	3.4865	15.0249	13.9585	1.49762	14.3157	15.6425	-1.32688	0.398631	Down	6.52306e-06	0.000333596	14.5331	14.3156	14.4723	14.223	14.0345	15.3311	15.7976	15.7435	15.5362	15.8043
15.04_163.0977m/z	163.098	15.0361	pos	1H-Pyrido[3,2-c][1,2]diazepine	202453	HMDB0247188		Organoheterocyclic compounds	Pyridines and derivatives	Unclassified	M+NH4	C8H7N3	-1.02423	16.3863	14.4887	1.49658	17.6019	15.7422	1.85977	3.62949	Up	0.0268213	0.0824905	16.5274	18.488	15.6509	18.3991	18.9443	15.5868	15.0975	15.601	15.7884	16.6372
1.20_453.0769m/z	453.077	1.2015	neg	Susalimod	212118	HMDB0258638		Benzenoids	Benzene and substituted derivatives	Benzenesulfonamides	M+FA-H	C21H16N2O5S	1.69357	17.3539	17.5488	1.4946	15.1771	13.3404	1.83667	3.57184	Up	0.0277962	0.0845759	15.7942	15.8624	16.626	14.6756	12.9272	13.1548	13.9784	13.8206	12.8438	12.9045
1.30_365.0516m/z	365.052	1.30498	neg	Phosphoribosyl formamidocarboxamide	47588	HMDB0001439	C04734	Nucleosides, nucleotides, and analogues	Imidazole ribonucleosides and ribonucleotides	1-ribosyl-imidazolecarboxamides	M-H	C10H15N4O9P	3.43676	12.9696	13.3295	1.4937	12.7455	11.3687	1.37674	2.59682	Up	0.000129436	0.00222552	12.9546	12.6816	13.1221	12.42	12.5492	11.7348	10.8186	11.3111	11.52	11.4592
10.50_479.2607m/z	479.261	10.5016	pos	Diflucortolone valerate	205904	HMDB0251261		Lipids and lipid-like molecules	Steroids and steroid derivatives	Pregnane steroids	M+H	C27H36F2O5	0.750376	7.04205	7.04205	1.49175	10.0047	11.9088	-1.90411	0.267182	Down	0.0387511	0.108248	10.9023	10.5315	7.04205	10.7913	10.7565	11.8175	11.2816	11.9448	11.9251	12.5753
5.53_231.1238m/z	231.124	5.5306	neg	3R-hydroxy-4R-decanolide	7879			Organoheterocyclic compounds	Lactones	Gamma butyrolactones	M+FA-H	C10H18O3	-0.0884704	13.5103	13.5739	1.49159	15.1229	13.661	1.46183	2.75457	Up	0.00120096	0.00989796	15.0347	14.5779	15.7868	15.6159	14.5991	13.199	14.1912	13.5635	13.7651	13.5864
14.95_98.0716m/z	98.0716	14.9529	pos	1-Nitrosopiperazine	199502	HMDB0243969		Organoheterocyclic compounds	Diazinanes	Piperazines	M+H-H2O	C4H9N3O	2.51902	16.3553	14.6278	1.49058	17.5185	15.6303	1.88815	3.70159	Up	0.0319142	0.0935544	16.4165	18.4597	15.4228	18.3271	18.9662	15.5341	14.8902	15.5341	15.6762	16.5171
4.71_244.0651m/z	244.065	4.70722	neg	2-(4-Methyl-5-thiazolyl)ethyl propionate	56774	HMDB0032424		Organoheterocyclic compounds	Azoles	Thiazoles	M+FA-H	C9H13NO2S	0.96127	10.0321	10.7098	1.48703	11.287	9.91902	1.36802	2.58116	Up	0.000142607	0.00237024	11.0572	10.9542	11.6811	11.6403	11.1023	9.43409	10.0369	9.86721	10.1378	10.1191
1.24_261.0533m/z	261.053	1.24172	neg	5-Fluorouridine	82298	HMDB0060396	C16633	Nucleosides, nucleotides, and analogues	Pyrimidine nucleosides	Unclassified	M-H	C9H11FN2O6	1.92441	11.6359	12.9613	1.48625	12.4693	11.0954	1.37385	2.59162	Up	0.0001387	0.00233449	12.5066	12.7764	11.8421	12.4481	12.7733	11.2128	10.8408	11.4173	11.1388	10.8676
11.60_336.2550m/z	336.255	11.604	neg	Linoleoyl glycine	266509			Organic acids and derivatives	Carboxylic acids and derivatives	Amino acids, peptides, and analogues	M-H	C20H35NO3	1.68096	12.2888	11.7919	1.48506	11.7228	13.1325	-1.40972	0.376385	Down	0.000660372	0.00678924	11.8904	11.7314	11.3422	11.3739	12.276	12.3921	13.2134	13.135	13.4393	13.4827
4.51_372.1785m/z	372.179	4.50885	neg	PC(O-5:0/0:0)[R]	19902			Lipids and lipid-like molecules	Glycerophospholipids	Glycerophosphocholines	M+FA-H	C13H30NO6P	-2.31904	8.78531	9.24717	1.48385	9.90241	8.50436	1.39804	2.63544	Up	0.000453285	0.0053025	10.4145	9.94651	10.3419	9.54572	9.26339	8.34585	8.8355	8.24936	8.49004	8.60106
10.75_577.2781m/z	577.278	10.7462	neg	PI(18:2/0:0)	24877	HMDB0240597		Lipids and lipid-like molecules	Glycerophospholipids	Glycerophosphoinositols	M-H2O-H	C27H49O12P	-0.383337	12.7652	12.9566	1.48324	12.7723	11.0155	1.75689	3.37969	Up	0.0183398	0.0626883	12.913	12.4161	12.7991	12.957	12.7765	9.96925	9.48251	11.6551	11.2226	12.7478
12.25_325.2177m/z	325.218	12.2544	neg	4,5-dehydro Docosahexaenoic Acid	273699			Lipids and lipid-like molecules	Fatty Acyls	Fatty acids and conjugates	M-H	C22H30O2	1.32563	10.8858	11.3507	1.47993	9.27902	11.0329	-1.75386	0.296506	Down	0.0222026	0.0715399	9.83253	9.50567	9.7966	7.04205	10.2182	10.747	10.2117	11.392	11.3252	11.4885
9.99_398.3263m/z	398.326	9.98607	pos	trans-Hexadec-2-enoyl carnitine	8391	HMDB0006317		Lipids and lipid-like molecules	Fatty Acyls	Fatty acid esters	M+H	C23H43NO4	-0.496626	13.9806	14.2059	1.47734	13.7532	15.0802	-1.32702	0.398592	Down	7.05241e-05	0.00143463	13.876	14.1752	13.7227	13.5591	13.4329	14.8412	14.8586	14.9665	15.4408	15.2938
9.14_271.2282m/z	271.228	9.14367	neg	2-Hydroxypalmitic acid	1691			Lipids and lipid-like molecules	Fatty Acyls	Fatty acids and conjugates	M-H	C16H32O3	1.3922	13.8378	13.785	1.47702	13.5245	14.8464	-1.32192	0.400003	Down	5.67205e-05	0.00126401	13.4712	13.7853	13.6304	13.4946	13.2409	14.5671	14.505	14.7955	15.2082	15.1562
3.58_367.2000m/z	367.2	3.58165	pos	Met-Ile-Ser	265453			Organic acids and derivatives	Carboxylic acids and derivatives	Amino acids, peptides, and analogues	M+NH4	C14H27N3O5S	-2.83149	10.8437	11.2685	1.47664	11.2181	9.7903	1.42783	2.69042	Up	0.000961953	0.00858441	11.1758	11.1622	11.3809	11.5946	10.7772	9.4625	9.49575	9.23453	10.4795	10.2792
11.04_428.1669m/z	428.167	11.0355	neg	Quetiapine	48458	HMDB0005021	C07397	Organoheterocyclic compounds	Benzothiazepines	Dibenzothiazepines	M+FA-H	C21H25N3O2S	4.9905	10.5542	11.4837	1.47518	12.6107	11.1932	1.41756	2.67134	Up	0.000865815	0.00794523	12.1528	12.6982	12.3116	13.5953	12.2958	11.0299	11.1287	11.5097	11.1361	11.1615
6.04_298.0911m/z	298.091	6.04295	neg	7-Methylxanthosine	254951	HMDB0301918	C16352	Nucleosides, nucleotides, and analogues	Purine nucleosides	Unclassified	M-H	C11H15N4O6+	-2.71134	9.79415	9.83729	1.47418	11.4107	9.9757	1.43497	2.70377	Up	0.00127725	0.0102928	11.2853	10.7425	11.9637	11.8568	11.2051	9.30913	10.5054	9.94874	10.1065	10.0088
9.21_416.3029m/z	416.303	9.20662	neg	9-Methyltridecanoylcarnitine	197386	HMDB0240830		Lipids and lipid-like molecules	Fatty Acyls	Fatty acid esters	M+FA-H	C21H41NO4	2.94836	11.3016	10.4662	1.47406	10.5787	12.029	-1.4503	0.365945	Down	0.00179993	0.0128442	10.4401	11.1945	10.6326	10.7159	9.91011	11.7722	11.2576	12.0995	12.5891	12.4264
6.21_444.2048m/z	444.205	6.21097	pos	Nitromifene	209612	HMDB0255655		Phenylpropanoids and polyketides	Stilbenes	Unclassified	M+	C27H28N2O4	-0.204369	7.04205	7.04205	1.47374	12.4912	10.9833	1.50784	2.84384	Up	0.00351514	0.0201175	11.9601	12.1005	12.5898	13.5271	12.2784	10.1626	11.2875	10.7179	11.2714	11.4774
13.22_601.2512m/z	601.251	13.2194	pos	PKOOA-PA	28049			Lipids and lipid-like molecules	Glycerophospholipids	Glycerophosphates	M+K	C27H47O10P	-4.75622	13.377	12.4577	1.47317	12.4133	13.824	-1.41066	0.376139	Down	0.000819471	0.00763755	12.9961	12.8939	12.5883	11.6254	11.963	13.9148	13.9379	13.7912	13.8029	13.6732
13.53_313.2390m/z	313.239	13.532	neg	Methyl 9Z-hexadecenoate	7240			Lipids and lipid-like molecules	Fatty Acyls	Fatty acid esters	M+FA-H	C17H32O2	1.96467	14.3294	14.8398	1.47229	16.2871	14.6929	1.59424	3.01936	Up	0.00869763	0.0370276	16.0993	15.454	17.0293	17.2207	15.6322	14.3009	15.6317	14.3982	15.0848	14.0487
11.31_310.2393m/z	310.239	11.309	neg	Commendamide	8905			Organic acids and derivatives	Carboxylic acids and derivatives	Amino acids, peptides, and analogues	M-H2O-H	C18H35NO4	1.67862	10.9575	11.0079	1.47198	10.6579	12.0715	-1.4136	0.375374	Down	0.00106926	0.00923217	10.8491	11.0043	10.5463	9.87488	11.0148	11.3482	12.2811	12.0938	12.2508	12.3835
15.31_85.0400m/z	85.04	15.3127	pos	Cycloserine	35138	HMDB0014405	C08057	Organoheterocyclic compounds	Azolines	Isoxazolines	M+H-H2O	C3H6N2O2	3.84439	16.6201	15.2882	1.47059	17.6772	15.9432	1.73398	3.32644	Up	0.019824	0.0661741	16.661	18.3816	16.0944	18.3699	18.879	15.9659	15.1104	15.947	16.0617	16.6309
13.74_307.2647m/z	307.265	13.744	neg	Hormelic acid	2555			Lipids and lipid-like molecules	Fatty Acyls	Fatty acids and conjugates	M-H	C20H36O2	1.50956	14.5052	14.4169	1.47045	14.0571	15.3503	-1.29322	0.40804	Down	1.33505e-05	0.000549023	14.028	14.1576	13.9283	13.8328	14.3389	15.6575	15.5041	15.0604	15.2211	15.3085
0.73_213.0167m/z	213.017	0.733133	neg	Polyribosylribitolphosphate	204777	HMDB0249913		Organic oxygen compounds	Organooxygen compounds	Carbohydrates and carbohydrate conjugates	M-H2O-H	C5H13O8P	-0.951439	13.1858	12.5834	1.46864	14.8426	16.6037	-1.76102	0.295039	Down	0.0245374	0.0770481	14.6801	14.9531	14.6652	15.0055	14.9094	14.5542	18.3331	16.1866	16.5348	17.4097
9.71_441.3451n	442.352	9.71457	pos	(9Z)-12-Hydroxyoctadec-9-enoylcarnitine	198077	HMDB0241536		Lipids and lipid-like molecules	Fatty Acyls	Fatty acid esters	M+H, M+Na	C25H47NO5	-0.626975	15.7179	15.9575	1.46482	15.459	16.7705	-1.31143	0.402921	Down	9.22514e-05	0.00171809	15.5708	15.67	15.5365	15.2182	15.2995	16.7095	16.2795	16.6176	17.1315	17.1142
12.35_574.4961n	575.503	12.3513	pos	Dieporeticanin	254856	HMDB0301772		Lipids and lipid-like molecules	Fatty Acyls	Fatty alcohols	M+H, M+Na	C37H66O4	-0.0811994	16.3959	15.4448	1.46422	15.4979	16.8337	-1.3358	0.396173	Down	0.000190624	0.00286942	15.9414	15.7425	15.4145	15.2407	15.1501	17.1692	17.036	16.8191	16.8028	16.3411
4.10_727.3331m/z	727.333	4.09667	pos	PKHdiA-PI	27982			Lipids and lipid-like molecules	Glycerophospholipids	Glycerophosphoinositols	M+H	C32H55O16P	4.2656	12.9239	12.8849	1.45942	12.1085	10.8231	1.28539	2.43748	Up	2.53285e-05	0.000777196	12.2418	12.0099	12.126	12.2905	11.8742	10.3376	10.9202	10.9097	11.0971	10.851
0.99_606.0766m/z	606.077	0.992083	neg	UDP-N-acetyl-D-mannosamine	52179	HMDB0013112	C01170	Nucleosides, nucleotides, and analogues	Pyrimidine nucleotides	Pyrimidine nucleotide sugars	M-H	C17H27N3O17P2	3.83214	18.868	19.7057	1.45618	19.5159	18.1837	1.3322	2.51786	Up	0.000282811	0.0038171	19.6298	19.4591	19.6584	19.1781	19.6539	18.5777	17.5789	17.8725	18.3359	18.5533
12.37_733.4773m/z	733.477	12.3742	pos	PS(17:2/14:1)	21542			Lipids and lipid-like molecules	Glycerophospholipids	Glycerophosphoserines	M+NH4	C37H66NO10P	1.40223	12.9752	13.1823	1.45485	13.1437	14.5821	-1.43843	0.36897	Down	0.0025711	0.0161007	13.7132	13.1115	12.5859	12.9469	13.3608	15.0762	14.9395	14.7116	14.6539	13.5292
6.45_209.1534m/z	209.153	6.44865	pos	2,2,6,7-Tetramethylbicyclo[4.3.0]nona-1(9),4-diene-7,8-diol	60364	HMDB0036686		Organic oxygen compounds	Organooxygen compounds	Alcohols and polyols	M+H	C13H20O2	-0.993365	11.6177	11.4824	1.45362	12.9108	11.4883	1.42252	2.68053	Up	0.00236765	0.0153072	12.5905	12.3302	13.7401	13.5819	12.3112	11.5638	11.7993	11.2686	11.3233	11.4863
12.14_340.2843m/z	340.284	12.1436	pos	N-Oleoyl glycine	8659	HMDB0013631		Organic acids and derivatives	Carboxylic acids and derivatives	Amino acids, peptides, and analogues	M+H	C20H37NO3	-0.818596	10.5503	10.5361	1.45317	10.0417	11.4199	-1.37826	0.384682	Down	0.00123883	0.0101264	10.4346	10.2582	9.46014	9.59062	10.4647	10.7128	11.4288	11.5531	11.7356	11.6692
9.38_297.2439m/z	297.244	9.37638	neg	1-O-(2R-hydroxy-4Z-pentadecenyl)-sn-glycerol	10482			Lipids and lipid-like molecules	Fatty Acyls	Fatty alcohols	M-H2O-H	C18H36O4	1.2915	13.6014	13.8801	1.45097	13.3585	14.6715	-1.31299	0.402486	Down	0.000245828	0.0034287	13.4735	13.4586	13.5089	13.1985	13.1529	14.424	14.1312	14.562	15.0921	15.148
9.21_227.2016m/z	227.202	9.20662	neg	6-Tridecene	9590			Hydrocarbons	Unsaturated hydrocarbons	Unsaturated aliphatic hydrocarbons	M+FA-H	C13H26	-0.18657	11.5284	10.9195	1.45095	11.0082	12.345	-1.33685	0.395885	Down	0.000509422	0.00577296	11.1107	11.3374	10.9177	11.0773	10.5978	12.0999	11.6901	12.4289	12.8232	12.683
10.41_309.1691m/z	309.169	10.4078	neg	Valdiate	64096	HMDB0040980		Lipids and lipid-like molecules	Prenol lipids	Monoterpenoids	M-H	C17H26O5	-5.17624	10.389	10.3823	1.45081	9.71368	11.1744	-1.46076	0.363302	Down	0.00394621	0.0217423	9.63433	9.33352	9.98129	9.62935	9.9899	10.5745	10.4495	10.8503	11.926	12.0718
5.03_208.0968m/z	208.097	5.0312	pos	Phenylpropionylglycine	47265	HMDB0000860		Organic acids and derivatives	Carboxylic acids and derivatives	Amino acids, peptides, and analogues	M+H	C11H13NO3	-0.0366642	10.3204	7.04205	1.44989	7.93485	9.77479	-1.83994	0.279334	Down	0.0392	0.109134	9.51545	7.04205	9.03268	7.04205	7.04205	10.2677	11.1064	8.36396	10.2693	8.86659
9.38_365.2324m/z	365.232	9.37638	neg	(ent-2alpha,3beta,15beta)-16-Kaurene-2,3,15-triol	62052	HMDB0038689		Lipids and lipid-like molecules	Prenol lipids	Diterpenoids	M+FA-H	C20H32O3	-2.9337	9.49773	10.249	1.44881	9.34467	10.8097	-1.46507	0.362217	Down	0.00400979	0.0219411	9.92361	9.46556	9.8189	9.19049	8.32479	10.6841	10.0454	10.7777	11.1426	11.399
6.97_239.1654m/z	239.165	6.97398	neg	4,7-Megastigmadien-9-ol	62091	HMDB0038731		Lipids and lipid-like molecules	Prenol lipids	Sesquiterpenoids	M+FA-H	C13H22O	0.57499	10.4795	9.90528	1.44527	10.103	11.4789	-1.37588	0.385318	Down	0.00113939	0.0095484	10.1836	10.1559	10.2169	10.6951	9.26351	11.3767	11.2035	11.1447	11.7237	11.9457
8.49_648.3155m/z	648.316	8.48555	neg	PKOOA-PS	27940			Lipids and lipid-like molecules	Glycerophospholipids	Glycerophosphoserines	M-H	C30H52NO12P	0.110262	7.04205	9.08368	1.44518	11.2482	9.87113	1.37706	2.59739	Up	0.0010987	0.00938487	11.7583	11.8836	10.657	10.9995	10.9425	9.85035	9.84538	9.41494	10.252	9.99301
13.41_371.1625m/z	371.162	13.4101	pos	PGE3 1,15-lactone	3800			Lipids and lipid-like molecules	Fatty Acyls	Eicosanoids	M+K	C20H28O4	1.70984	13.7859	12.9222	1.44307	12.6451	13.9728	-1.32775	0.39839	Down	0.000487768	0.00557756	13.3917	12.893	12.3142	12.1982	12.4282	14.2802	13.9593	13.9573	13.8301	13.8371
3.48_332.1259m/z	332.126	3.47967	neg	Tryptophyl-Glutamate	54093	HMDB0029082		Organic acids and derivatives	Carboxylic acids and derivatives	Amino acids, peptides, and analogues	M-H	C16H19N3O5	2.0327	9.22671	9.73372	1.4415	10.0448	8.756	1.28882	2.44329	Up	0.000207841	0.00304808	9.90377	9.64909	10.4667	10.2411	9.96343	9.32131	8.55431	8.69149	8.62677	8.5861
12.47_351.1488m/z	351.149	12.466	neg	AM2232	467428			Organoheterocyclic compounds	Indoles and derivatives	Naphthoylindoles	M-H	C24H20N2O	-4.26751	12.7162	12.8124	1.44093	11.8966	13.3251	-1.42851	0.371515	Down	0.00324423	0.01892	12.3618	12.4143	11.6677	10.7077	12.3316	13.5794	13.2595	13.3851	13.4612	12.9403
9.10_639.2787m/z	639.279	9.10247	neg	Sodium decylbenzenesulfonate	256171	HMDB0303294		Benzenoids	Benzene and substituted derivatives	Benzenesulfonic acids and derivatives	2M-H	C16H25NaO3S	2.42748	14.5087	12.9914	1.43897	13.1631	14.4397	-1.27651	0.412792	Down	0.000130792	0.00223918	13.4968	13.4241	13.1178	13.269	12.508	14.3833	14.5147	14.4872	14.5784	14.2347
7.52_207.1378m/z	207.138	7.5214	pos	8-hydroxy-3E,5E,10E,12-tridecatetraen-2-one	10157			Lipids and lipid-like molecules	Fatty Acyls	Fatty alcohols	M+H	C13H18O2	-0.970139	11.1055	11.1405	1.43728	12.4901	11.037	1.45307	2.7379	Up	0.00501701	0.0253007	12.3123	11.8563	13.2694	13.3612	11.6511	10.8847	11.5275	10.7172	10.9607	11.0948
3.38_495.1029m/z	495.103	3.38145	neg	Nitrefazole	209590	HMDB0255633		Organoheterocyclic compounds	Azoles	Imidazoles	2M-H	C10H8N4O4	2.16473	13.2561	14.5384	1.43584	13.534	12.2604	1.27365	2.41773	Up	0.000180436	0.00280062	13.5782	13.1378	14.1663	13.4632	13.3247	12.4959	12.2274	12.2951	11.9612	12.3223
4.41_302.1961m/z	302.196	4.41093	pos	4-Hydroxy-6-octenoylcarnitine	198230	HMDB0241704		Lipids and lipid-like molecules	Fatty Acyls	Fatty acid esters	M+H	C15H27NO5	-0.257635	12.92	12.5968	1.43546	11.9673	13.2292	-1.26184	0.417011	Down	9.47073e-05	0.00172506	11.777	12.1119	12.3525	11.7095	11.8858	12.8582	13.0015	13.2904	13.4646	13.5312
12.11_289.2178m/z	289.218	12.1071	neg	10,13-nonadecadiynoic acid	986			Lipids and lipid-like molecules	Fatty Acyls	Fatty acids and conjugates	M-H	C19H30O2	1.67281	9.43695	9.44446	1.43391	7.97191	9.48414	-1.51222	0.35057	Down	0.00887175	0.0375285	8.6396	8.80809	8.32777	7.04205	7.04205	9.06247	9.13169	9.30195	10.1621	9.76247
0.89_565.0497m/z	565.05	0.887367	neg	UDP-D-galactose	258292		C00052	Nucleosides, nucleotides, and analogues	Pyrimidine nucleotides	Pyrimidine nucleotide sugars	M-H	C15H24N2O17P2	3.38642	18.4137	19.1245	1.43117	19.1877	17.8546	1.33314	2.51951	Up	0.000903386	0.0081845	19.3755	19.1119	19.5778	18.6575	19.2158	18.2566	17.1788	17.5891	17.9745	18.2739
4.62_199.0974m/z	199.097	4.61595	neg	3-Hydroxysebacic acid	47004	HMDB0000350		Organic acids and derivatives	Hydroxy acids and derivatives	Medium-chain hydroxy acids and derivatives	M-H2O-H	C10H18O5	-1.03848	11.0958	11.1393	1.4289	12.2341	10.8646	1.36955	2.5839	Up	0.0019893	0.0135646	12.0485	11.7891	12.8004	13.0275	11.5052	10.5887	11.0305	10.9002	10.786	11.0174
14.97_76.0398m/z	76.0398	14.9734	pos	Tri-hydroxymethylaminomethane	212543	HMDB0259134		Organic oxygen compounds	Organooxygen compounds	Ortho acids	M+H-H2O	C2H7NO3	4.98235	15.6053	13.5249	1.42389	16.4208	14.6536	1.76722	3.40396	Up	0.0375186	0.105619	15.5815	17.2741	14.3719	16.9824	17.894	14.4605	13.7172	14.6681	14.752	15.67
3.94_203.0923m/z	203.092	3.94423	neg	3-keto-n-caprylic acid	2053	HMDB0010721		Organic acids and derivatives	Keto acids and derivatives	Medium-chain keto acids and derivatives	M+FA-H	C8H14O3	-1.32075	7.04205	9.08966	1.4226	9.78936	8.32291	1.46646	2.76342	Up	0.00805008	0.0351717	10.4401	9.55991	10.153	9.82542	8.96842	8.44565	8.9622	8.47369	7.04205	8.69094
0.65_175.1439m/z	175.144	0.64835	pos	Ethyl lysine	206575	HMDB0252051		Organic acids and derivatives	Carboxylic acids and derivatives	Amino acids, peptides, and analogues	M+H	C8H18N2O2	-1.40772	9.13224	7.04205	1.42219	9.0572	7.59501	1.46219	2.75527	Up	0.00672975	0.0308563	9.03107	8.61918	9.6904	9.36307	8.58229	7.04205	8.57856	7.04205	8.27034	7.04205
11.12_868.6096m/z	868.61	11.1175	neg	PE(24:1/18:3)	50404	HMDB0009754	C00350	Lipids and lipid-like molecules	Glycerophospholipids	Glycerophosphoethanolamines	M+FA-H	C47H86NO8P	2.80254	9.67877	7.04205	1.42216	9.48259	11.2311	-1.74846	0.297619	Down	0.0342866	0.0986791	10.1109	9.51441	10.5352	10.2104	7.04205	11.7669	11.7715	11.3673	10.4059	10.8437
5.40_281.1011m/z	281.101	5.39507	neg	3-carboxy-4-methyl-5-(4-oxopentyl)-2-furanpropanoic acid	2675			Lipids and lipid-like molecules	Fatty Acyls	Fatty acids and conjugates	M-H	C14H18O6	-7.10927	9.308	10.2586	1.4212	11.9773	10.3624	1.6149	3.06291	Up	0.0247473	0.0774321	11.6072	10.9855	13.0456	12.8716	11.3764	10.9424	11.1887	9.21174	9.50723	10.9619
1.62_310.1759m/z	310.176	1.62	pos	Lysyltyrosine	53984	HMDB0028963		Organic acids and derivatives	Carboxylic acids and derivatives	Amino acids, peptides, and analogues	M+H	C15H23N3O4	-0.607657	12.913	13.4227	1.41986	14.2417	13.0203	1.22135	2.33165	Up	6.4817e-05	0.00138265	14.1487	14.3213	14.2758	14.6506	13.8119	12.9862	13.2491	12.9253	12.7643	13.1766
13.19_343.2646m/z	343.265	13.1927	neg	17-phenyl-13E-heptadecenoic acid	2594			Lipids and lipid-like molecules	Fatty Acyls	Fatty acids and conjugates	M-H	C23H36O2	0.94143	11.2108	10.5128	1.41871	10.2757	11.5638	-1.28807	0.409498	Down	0.00051411	0.00577684	10.5815	10.6699	10.3417	10.1892	9.59639	11.7088	11.769	11.6859	11.6004	11.0548
6.04_349.0889m/z	349.089	6.04295	neg	Penicillin V	52776	HMDB0014561	C08126	Organic acids and derivatives	Carboxylic acids and derivatives	Amino acids, peptides, and analogues	M-H	C16H18N2O5S	7.28602	11.5856	11.4637	1.41832	13.0162	11.7085	1.30767	2.47542	Up	0.000955706	0.00854779	12.7118	12.4378	13.4334	13.6024	12.8953	11.3994	12.2036	11.6341	11.5677	11.7377
9.18_257.1761m/z	257.176	9.18493	neg	2,6,10,10-Tetramethyl-1-oxaspiro[4.5]decan-6-ol	61390	HMDB0037907		Organoheterocyclic compounds	Tetrahydrofurans	Unclassified	M+FA-H	C13H24O2	1.04353	13.2563	14.8808	1.41791	14.1636	12.8575	1.30616	2.47283	Up	0.000669848	0.00684356	14.1841	14.5048	13.6471	13.71	14.7723	12.5143	12.7639	13.1236	12.8665	13.0191
1.30_269.0789m/z	269.079	1.30498	neg	L-3-Hydroxykynurenine	51426	HMDB0011631	C03227	Organic oxygen compounds	Organooxygen compounds	Carbonyl compounds	M+FA-H	C10H12N2O4	4.25769	13.1337	13.3304	1.4174	12.8918	11.6556	1.2362	2.35577	Up	0.000115428	0.00201948	13.1761	12.8208	13.2784	12.79	12.3937	11.861	11.3913	11.6347	11.7921	11.5989
13.07_305.2490m/z	305.249	13.0698	neg	ETrE(5Z, 8Z, 11Z)	873	HMDB0010378		Lipids and lipid-like molecules	Fatty Acyls	Fatty acids and conjugates	M-H	C20H34O2	1.35193	16.9292	16.9442	1.41724	16.0508	17.2828	-1.23191	0.425754	Down	0.000106674	0.00189965	16.3997	16.2662	15.9794	15.4558	16.1531	17.3084	17.4039	17.3197	17.3297	17.052
1.30_419.0984n	400.081	1.30498	neg	Cyanidin 3-xyloside	61454	HMDB0037984		Phenylpropanoids and polyketides	Flavonoids	Flavonoid glycosides	M-H2O-H, M+FA-H	C20H19O10+	1.35399	14.7037	14.8364	1.41712	14.005	12.7937	1.21132	2.31549	Up	3.1406e-05	0.000869989	14.1784	14.0104	14.2654	13.6743	13.8966	12.4862	12.9522	12.6453	13.0249	12.8598
13.55_354.2655m/z	354.266	13.5505	neg	(9Me,4E,8E,10E-d19:3)sphingosine	38957			Organic nitrogen compounds	Organonitrogen compounds	Amines	M+FA-H	C19H35NO2	1.75268	12.4006	11.7839	1.41613	10.6597	12.1126	-1.45291	0.365283	Down	0.00746057	0.0334009	11.5064	11.106	9.61593	10.9223	10.1476	12.5266	12.262	12.2816	12.2533	11.2393
15.31_124.0869m/z	124.087	15.3127	pos	L-Histidinol	48102	HMDB0003431	C00860	Organic nitrogen compounds	Organonitrogen compounds	Amines	M+H-H2O	C6H11N3O	0.059689	22.9702	22.0465	1.41599	24.0728	22.4412	1.6316	3.09855	Up	0.0228643	0.0732014	23.0045	24.7511	22.5051	24.8755	25.2279	22.5739	21.7963	22.3522	22.5346	22.9491
6.68_274.2009m/z	274.201	6.67605	pos	5-Methylhexanoylcarnitine	197593	HMDB0241037		Lipids and lipid-like molecules	Fatty Acyls	Fatty acid esters	M+H	C14H27NO4	-1.2487	14.2717	14.4393	1.41599	15.8038	14.4438	1.35995	2.56676	Up	0.00261883	0.0163212	15.5181	15.2639	16.4266	16.5837	15.2267	14.3451	14.8825	14.1477	14.486	14.3579
12.40_363.2097m/z	363.21	12.4039	neg	Fallypride	206675	HMDB0252161		Benzenoids	Benzene and substituted derivatives	Methoxybenzenes	M-H	C20H29FN2O3	2.02817	13.0213	13.5049	1.41302	12.107	13.593	-1.48594	0.357017	Down	0.0107183	0.0428038	13.3673	11.7878	12.3258	10.7237	12.3305	13.6464	13.1611	13.8852	13.7996	13.4726
1.37_237.9769m/z	237.977	1.367	neg	Formothion	206932	HMDB0252447	C18988	Organic acids and derivatives	Carboxylic acids and derivatives	Carboxylic acid derivatives	M-H2O-H	C6H12NO4PS2	0.929063	10.9533	10.7261	1.40809	8.9935	7.31741	1.67609	3.19561	Up	0.0326647	0.0947836	9.62011	9.36455	10.5041	8.43664	7.04205	7.04205	7.04205	8.41885	7.04205	7.04205
9.08_309.2077m/z	309.208	9.08213	neg	Porrigenic acid	2210			Lipids and lipid-like molecules	Fatty Acyls	Lineolic acids and derivatives	M-H	C18H30O4	1.7726	9.74551	10.4383	1.40768	11.9626	10.7029	1.25966	2.39439	Up	0.000361216	0.00455978	11.8669	12.1412	11.3121	12.4701	12.0225	10.4623	10.9601	10.6565	10.8901	10.5456
1.30_110.0351m/z	110.035	1.29813	pos	2-Methyl-5-nitroimidazole	200662	HMDB0245223		Organoheterocyclic compounds	Azoles	Imidazoles	M+H-H2O	C4H5N3O2	1.64427	9.33378	10.0538	1.40714	9.65652	8.28441	1.37211	2.58848	Up	0.00334669	0.0193478	9.87451	9.63971	9.89628	9.38767	9.4844	8.53362	8.83859	8.54002	8.46777	7.04205
13.07_385.3462m/z	385.346	13.0727	pos	3-Deoxy-25-hydroxyvitamin D3	45780			Lipids and lipid-like molecules	Steroids and steroid derivatives	Vitamin D and derivatives	M+H	C27H44O	-0.743977	10.4195	9.80938	1.40527	9.62819	10.8594	-1.23119	0.425967	Down	0.00019529	0.00291743	9.63225	10.1638	9.36225	9.69163	9.29102	11.1217	10.9436	10.6772	11.0297	10.5246
12.06_330.2459m/z	330.246	12.06	pos	EPA (d5)	1175	HMDB01999	C06428	Lipids and lipid-like molecules	Fatty Acyls	Fatty acids and conjugates	M+Na	C20H25D5O2	2.35092	10.2783	9.55537	1.40132	11.3355	12.5604	-1.22488	0.427832	Down	0.000272381	0.00370829	11.3322	11.3809	10.7101	11.7399	11.5143	12.3639	12.6187	12.4436	12.9278	12.4478
12.77_372.2584m/z	372.258	12.7666	neg	N-stearoyl taurine	8655	HMDB0240595		Lipids and lipid-like molecules	Fatty Acyls	Fatty amides	M-H2O-H	C20H41NO4S	1.56769	9.68016	10.3573	1.40079	9.75407	11.4985	-1.74438	0.298462	Down	0.0495679	0.129739	10.8271	10.5252	7.04205	9.49633	10.8796	11.8913	11.102	10.8994	12.0267	11.573
1.30_268.0809n	267.074	1.30498	neg	Inosine	46924	HMDB0000195	C00294	Nucleosides, nucleotides, and analogues	Purine nucleosides	Unclassified	M-H, 2M-H	C10H12N4O5	0.401514	19.6623	19.8843	1.39942	19.4715	18.2832	1.1883	2.27884	Up	5.29091e-05	0.00119917	19.7072	19.4007	19.8248	19.3191	19.1057	18.4849	18.0163	18.3287	18.3596	18.2266
14.77_367.3357m/z	367.336	14.7739	pos	3-ketocholesterol	43579			Lipids and lipid-like molecules	Steroids and steroid derivatives	Cholestane steroids	M+H-H2O	C27H44O	-0.669774	11.7358	11.718	1.39874	9.69432	11.4731	-1.7788	0.291426	Down	0.0495041	0.129739	10.4691	8.95643	10.982	11.022	7.04205	11.7496	11.6576	11.307	11.4885	11.1628
12.40_327.1251m/z	327.125	12.4039	neg	Lepidine D	56991	HMDB0032716		Benzenoids	Benzene and substituted derivatives	Diphenylethers	M-H2O-H	C20H18N4O2	-0.235493	11.6678	12.0966	1.39834	10.3623	11.8705	-1.50822	0.351545	Down	0.0155715	0.0559088	11.9413	10.7615	9.65501	9.18616	10.2675	12.1846	11.6195	11.552	12.0881	11.9085
1.26_117.0186m/z	117.019	1.26218	neg	Succinic acid	2857	HMDB0000254	C00042	Organic acids and derivatives	Carboxylic acids and derivatives	Dicarboxylic acids and derivatives	M-H	C4H6O4	-6.62127	12.4073	13.4435	1.39775	13.08	11.8725	1.20758	2.30949	Up	9.9706e-05	0.00179156	13.1204	13.3587	12.5522	13.1004	13.2685	11.9528	11.5508	12.0584	12.0325	11.7679
12.21_327.1274m/z	327.127	12.213	neg	2-hydroxymethylolanzapine	82825	HMDB0060987		Organoheterocyclic compounds	Benzodiazepines	Unclassified	M-H	C17H20N4OS	-3.23959	14.3296	13.923	1.39693	13.8303	14.9998	-1.1695	0.444576	Down	2.47411e-05	0.000771032	13.9757	14.2294	13.7591	13.4456	13.7418	14.9287	14.9729	14.9539	15.1258	15.0179
10.24_241.1810m/z	241.181	10.2449	neg	4-(2,6,6-Trimethyl-1-cyclohexenyl)-2-butanol	59961	HMDB0036172		Lipids and lipid-like molecules	Prenol lipids	Sesquiterpenoids	M+FA-H	C13H24O	0.298277	11.6035	11.16	1.39611	11.0063	12.339	-1.33267	0.397033	Down	0.00298613	0.0179393	10.8347	11.328	11.1727	10.6921	11.0042	11.9807	11.5537	12.1036	13.0398	13.0173
3.68_276.1805m/z	276.18	3.68072	pos	4-Hydroxyhexanoycarnitine	198196	HMDB0241665		Lipids and lipid-like molecules	Fatty Acyls	Fatty acid esters	M+H	C13H25NO5	-0.327961	12.6042	12.2682	1.3951	11.6731	12.8148	-1.1417	0.453226	Down	2.88156e-06	0.00020526	11.5802	11.8073	11.7966	11.7238	11.4574	12.7323	12.584	12.9979	12.9162	12.8435
4.53_277.0444m/z	277.044	4.53195	neg	Trifluridine	52790	HMDB0014576		Nucleosides, nucleotides, and analogues	Pyrimidine nucleosides	Pyrimidine 2'-deoxyribonucleosides	M-H2O-H	C10H11F3N2O5	0.761181	10.1998	9.89235	1.39385	12.1075	10.3764	1.73104	3.31968	Up	0.0462131	0.122978	13.7738	12.2802	12.0174	10.6804	11.7856	10.6572	12.0887	10.3083	10.1104	8.71759
10.34_414.3576m/z	414.358	10.3368	pos	3-MethylHexadecanoylcarnitine	197418	HMDB0240862		Lipids and lipid-like molecules	Fatty Acyls	Fatty acid esters	M+H	C24H47NO4	-0.509076	13.6004	13.5471	1.3938	13.4425	14.6271	-1.18466	0.439927	Down	8.23631e-05	0.00158718	13.4954	13.5131	13.3832	13.5603	13.2604	14.2783	14.4287	14.453	14.9043	15.0714
10.20_663.3149m/z	663.315	10.2044	neg	Gibberellin A51	36010	HMDB0035041	C11865	Lipids and lipid-like molecules	Prenol lipids	Diterpenoids	2M-H	C19H24O5	-3.80163	9.7292	9.91993	1.39376	10.6709	12.1241	-1.45319	0.365214	Down	0.0119848	0.046325	10.9072	11.3457	9.01663	11.0265	11.0586	11.8296	11.8973	11.9715	12.7112	12.211
4.09_188.0382m/z	188.038	4.09125	neg	(2R,2'S)-Isobuteine	55227	HMDB0030411		Organic acids and derivatives	Carboxylic acids and derivatives	Amino acids, peptides, and analogues	M-H2O-H	C7H13NO4S	-2.48444	9.47196	10.2096	1.39095	10.8628	9.55646	1.30637	2.47318	Up	0.00223008	0.0146795	10.22	10.6329	11.4588	11.5315	10.471	9.64699	9.47839	9.36178	10.0063	9.28883
12.47_603.4416m/z	603.442	12.466	neg	Neoabietic acid	35912		C11889	Lipids and lipid-like molecules	Prenol lipids	Diterpenoids	2M-H	C20H30O2	-0.400134	11.2109	13.0943	1.38873	11.7211	10.2395	1.48157	2.79253	Up	0.0131225	0.0489213	11.3087	12.3844	11.7983	10.5466	12.5675	10.0692	9.31667	10.8798	10.1099	10.8221
10.93_798.5682m/z	798.568	10.932	neg	PE(P-18:0/20:3)	21115	HMDB0011384		Lipids and lipid-like molecules	Glycerophospholipids	Glycerophosphoethanolamines	M+FA-H	C43H80NO7P	3.72063	15.3802	14.027	1.38789	15.2472	16.5478	-1.30054	0.405974	Down	0.00220182	0.0145175	15.2119	15.3229	14.675	16.1178	14.9087	16.7023	16.6387	16.9346	16.4929	15.9705
4.25_178.0505m/z	178.05	4.25205	neg	Hippuric acid	47175	HMDB0000714	C01586	Benzenoids	Benzene and substituted derivatives	Benzoic acids and derivatives	M-H	C9H9NO3	-2.61841	13.7049	13.31	1.38747	15.1235	13.4632	1.6603	3.16083	Up	0.0400838	0.11073	16.0907	15.2812	15.6114	15.3818	13.2525	14.4663	14.5428	12.7976	13.3941	12.1152
10.73_355.2610m/z	355.261	10.7254	neg	N-myristoyl glutamine	8793			Organic acids and derivatives	Carboxylic acids and derivatives	Amino acids, peptides, and analogues	M-H	C19H36N2O4	2.08946	10.9794	9.49235	1.38658	9.62877	11.3057	-1.67692	0.31275	Down	0.0406035	0.111779	10.1783	10.5973	9.585	7.04205	10.7411	11.2929	11.7099	10.9903	11.3541	11.1813
10.81_640.2479m/z	640.248	10.8087	neg	Taurocholic acid 3-sulfate	46693	HMDB02581		Lipids and lipid-like molecules	Steroids and steroid derivatives	Bile acids, alcohols and derivatives	M+FA-H	C26H45NO10S2	1.97876	14.4859	14.018	1.38614	13.7955	14.9384	-1.14286	0.452861	Down	8.93002e-06	0.000434413	13.85	13.8398	13.7739	13.6555	13.8583	14.942	15.204	15.122	14.5915	14.8323
3.77_186.1489m/z	186.149	3.7741	pos	(1S,4R)-1-Hydroxy-2-oxolimonene	35388		C11937	Lipids and lipid-like molecules	Prenol lipids	Monoterpenoids	M+NH4	C10H16O2	0.0449868	8.60873	8.35532	1.3848	10.6703	9.295	1.37527	2.59416	Up	0.00646364	0.0302268	10.1271	9.94854	11.2027	11.7798	10.2933	9.09562	9.79944	9.07436	9.33988	9.16571
9.85_325.2753m/z	325.275	9.85072	neg	9Z-Nonadecenal	6705			Lipids and lipid-like molecules	Fatty Acyls	Fatty aldehydes	M+FA-H	C19H36O	1.87937	9.3061	9.96772	1.38206	8.95535	10.156	-1.20062	0.435088	Down	0.000412371	0.00496964	9.12857	8.67718	8.73475	9.09502	9.14121	10.0434	9.5988	10.6813	10.3731	10.0833
12.50_550.3864m/z	550.386	12.4982	pos	Butenoyl PAF	273691			Lipids and lipid-like molecules	Glycerophospholipids	Glycerophosphocholines	M+H	C28H56NO7P	-0.55803	14.7434	14.1468	1.38133	13.8791	15.0703	-1.19127	0.437917	Down	0.000204156	0.00300509	14.1633	13.8962	13.5905	14.2979	13.4476	15.3226	15.2135	14.9033	15.0659	14.8465
9.07_414.3211m/z	414.321	9.0732	pos	hydroxyhexadecenoylcarnitine	207632	HMDB0253270		Lipids and lipid-like molecules	Fatty Acyls	Fatty acids and conjugates	M+H	C23H43NO5	-0.759881	15.0202	15.3078	1.38002	14.5251	15.7756	-1.25052	0.420295	Down	0.00120618	0.00990014	14.8002	14.8786	14.6137	14.2207	14.1122	15.6131	15.3033	15.4419	16.3116	16.2081
9.51_208.1462n	209.153	9.50647	pos	3-Oxo-alpha-ionol	256655	HMDB0303805		Lipids and lipid-like molecules	Prenol lipids	Sesquiterpenoids	M+H-H2O, M+H	C13H20O2	-0.833486	12.2925	12.3847	1.37931	13.7681	12.4687	1.2994	2.46127	Up	0.00296867	0.0179153	13.5879	13.3147	14.3538	14.5162	13.0678	12.2923	12.8848	12.2002	12.4961	12.4699
12.64_227.1794m/z	227.179	12.6398	pos	(8E,15E)-1,8,15-Heptadecatriene-11,13-diyne	55698	HMDB0031041		Hydrocarbons	Unsaturated hydrocarbons	Enynes	M+H	C17H22	-0.21348	11.2081	11.5481	1.37931	10.5078	11.7577	-1.24992	0.420472	Down	0.00130903	0.0104226	11.0858	10.9269	10.1597	10.1278	10.2387	12.0521	11.4576	11.7536	12.1603	11.3649
4.97_213.1131m/z	213.113	4.96637	neg	2,6-Dimethyl-8-hydroxy-2E,6E-octadienal	6593			Lipids and lipid-like molecules	Prenol lipids	Monoterpenoids	M+FA-H	C10H16O2	-0.813541	11.2951	12.0013	1.37609	12.8314	11.5837	1.24771	2.37464	Up	0.00110131	0.00938684	12.7063	12.0583	13.0601	13.4653	12.8673	11.3196	11.5483	11.9171	11.6448	11.4889
1.26_411.1081m/z	411.108	1.26218	neg	5,7-Dihydroxy-6-methoxyflavone 5-rhamnoside	31180			Phenylpropanoids and polyketides	Flavonoids	Flavonoid glycosides	M-H2O-H	C22H22O9	-1.0071	14.2746	14.3981	1.37453	13.9993	12.8387	1.1606	2.2355	Up	0.000123962	0.00214994	14.094	13.8035	14.5293	13.6474	13.9224	12.8526	12.838	12.996	12.5695	12.9374
8.61_269.2126m/z	269.213	8.61043	neg	7-Ethyl-4-tridecen-6-one	10047			Organic oxygen compounds	Organooxygen compounds	Carbonyl compounds	M+FA-H	C15H28O	1.52461	12.3807	12.6378	1.37445	12.2621	13.4643	-1.20214	0.43463	Down	0.000487984	0.00557756	12.2597	12.5729	12.3212	12.1402	12.0165	13.2548	12.9943	13.2331	13.8963	13.9428
11.63_772.3272m/z	772.327	11.6273	neg	Nartograstim	209454	HMDB0255464		Organic acids and derivatives	Carboxylic acids and derivatives	Amino acids, peptides, and analogues	M+FA-H	C30H49N9O10S	-4.5348	16.1553	15.3116	1.37406	15.4304	16.6019	-1.17149	0.443963	Down	0.00014083	0.00235051	15.5353	15.3515	15.3242	15.6571	15.2839	17.1242	16.7074	16.5029	16.5142	16.1608
7.27_391.2136m/z	391.214	7.26663	neg	21-Deoxycortisol	48208	HMDB0004030	C05497	Lipids and lipid-like molecules	Steroids and steroid derivatives	Pregnane steroids	M+FA-H	C21H30O4	2.94359	14.595	12.5868	1.37349	13.9355	15.2042	-1.26875	0.41502	Down	0.00191817	0.013278	14.3023	14.4504	13.6638	14.0881	13.1727	15.6399	14.8426	14.9105	15.4837	15.1444
1.20_475.0589m/z	475.059	1.2015	neg	5-Hydroxy-3-[(5-nitrofuran-2-yl)methylideneamino]-1H-imidazol-2-one	213515	HMDB0260397		Organoheterocyclic compounds	Azoles	Imidazoles	2M-H	C8H6N4O5	-3.09338	15.909	16.1067	1.37195	13.8828	12.3405	1.54231	2.9126	Up	0.0288704	0.0871794	14.2469	14.3307	15.1248	13.3416	12.37	12.2776	12.9898	12.5452	11.0808	12.809
6.69_196.1098n	197.117	6.69292	pos	11-oxo-undeca-5,8-dienoic acid	2205			Lipids and lipid-like molecules	Fatty Acyls	Fatty acids and conjugates	M+H-H2O, M+H	C11H16O3	-0.790702	13.735	13.9852	1.36967	15.3265	14.0206	1.30589	2.47237	Up	0.00419773	0.022567	15.0493	14.8756	16.0677	16.0554	14.5846	13.8351	14.352	13.694	14.0987	14.1234
13.64_357.2806m/z	357.281	13.6383	neg	6Z,9Z,12Z,15Z,18Z-tetracosapentaenoic acid	1231	HMDB0006322		Lipids and lipid-like molecules	Fatty Acyls	Fatty acids and conjugates	M-H	C24H38O2	1.93547	14.9682	15.182	1.36818	14.6162	15.7778	-1.16156	0.447028	Down	0.000126637	0.00218682	14.7488	14.8354	14.7083	14.1358	14.6528	16.1066	15.925	15.4375	15.6446	15.7752
12.40_745.4458m/z	745.446	12.4039	neg	PG(22:6/14:1)	23298			Lipids and lipid-like molecules	Glycerophospholipids	Glycerophosphoglycerols	M-H2O-H	C42H69O10P	1.02281	16.893	16.9362	1.36619	15.9064	17.1989	-1.29243	0.408263	Down	0.00377072	0.0210478	16.8731	15.7083	15.7406	15.2063	16.0039	17.6614	16.7656	17.4408	17.2302	16.8964
1.30_303.0506m/z	303.051	1.30498	neg	S-Methyl benzenecarbothioate	54597	HMDB0029694		Benzenoids	Benzene and substituted derivatives	Benzoic acids and derivatives	2M-H	C8H8OS	-4.1125	13.9579	14.1476	1.36596	13.7984	12.6696	1.12883	2.18681	Up	4.56883e-05	0.00110455	14.0387	13.8153	14.0501	13.6752	13.4127	12.8799	12.6431	12.6472	12.7611	12.4165
5.33_243.1239m/z	243.124	5.32778	neg	4-Oxododecanedioic acid	534658			Organic acids and derivatives	Keto acids and derivatives	Medium-chain keto acids and derivatives	M-H	C12H20O5	0.58807	7.04205	8.34575	1.36592	9.47014	8.02441	1.44573	2.724	Up	0.0156252	0.0560513	9.63633	10.089	9.34409	9.57161	8.70969	8.48895	7.04205	7.04205	8.47172	9.07732
1.09_290.1345m/z	290.134	1.09393	pos	Ophthalmic acid	48597	HMDB0005765		Organic acids and derivatives	Carboxylic acids and derivatives	Amino acids, peptides, and analogues	M+H	C11H19N3O6	-0.561142	12.2	12.6994	1.36435	12.9732	11.5633	1.40997	2.65731	Up	0.0128899	0.0482798	13.1871	13.3861	12.6922	13.4498	12.151	12.3379	11.7504	10.2183	12.0729	11.4368
13.34_355.1587m/z	355.159	13.3368	neg	Hydroxyzine	52892	HMDB0014697	C07045	Benzenoids	Benzene and substituted derivatives	Diphenylmethanes	M-H2O-H	C21H27ClN2O2	1.26365	20.1511	19.9532	1.3604	19.5261	20.6334	-1.10731	0.464158	Down	1.82121e-05	0.000648643	19.7865	19.4106	19.6736	19.2009	19.559	20.8557	20.6283	20.6503	20.6016	20.4314
11.73_386.2709m/z	386.271	11.7289	neg	Dihydroevocarpine	205949	HMDB0251314		Organoheterocyclic compounds	Quinolines and derivatives	Quinolones and derivatives	M+FA-H	C23H35NO	2.45594	11.0843	10.6528	1.35998	10.4571	11.768	-1.3109	0.403069	Down	0.00540752	0.0266758	10.8155	10.628	10.6944	9.3248	10.823	11.0056	12.0055	11.7633	12.0139	12.0518
13.53_349.2367m/z	349.237	13.532	neg	MG(18:2+=O/0:0/0:0)	213602	HMDB0260489		Lipids and lipid-like molecules	Fatty Acyls	Lineolic acids and derivatives	M-H2O-H	C21H36O5	-4.80784	14.4258	14.9062	1.35905	13.7546	15.0017	-1.24714	0.421283	Down	0.0022604	0.0148301	14.1047	13.8598	13.4697	13.2938	14.0449	15.374	15.2777	15.0442	15.2193	14.0933
11.39_580.3607m/z	580.361	11.3894	pos	POB-PC	27840			Lipids and lipid-like molecules	Glycerophospholipids	Glycerophosphocholines	M+H	C28H54NO9P	-0.299036	12.0804	11.7451	1.35708	13.4224	12.2499	1.17245	2.25394	Up	0.000581307	0.00631835	13.1899	13.3359	13.9285	13.8033	12.8542	12.3276	12.4726	11.9843	12.2221	12.2431
10.81_576.2026m/z	576.203	10.8087	neg	Acrimarine J	63563	HMDB0040386		Organoheterocyclic compounds	Quinolines and derivatives	Benzoquinolines	M-H2O-H	C35H33NO8	-0.334156	12.9411	12.2935	1.35584	12.3972	13.5101	-1.11292	0.462358	Down	4.13106e-05	0.00102353	12.2313	12.504	12.3978	12.3621	12.4908	13.185	13.7779	13.7652	13.2239	13.5987
8.36_522.2855m/z	522.285	8.3605	neg	VAPIPROST	213009	HMDB0259765		Benzenoids	Benzene and substituted derivatives	Biphenyls and derivatives	M+FA-H	C30H39NO4	-1.38212	11.981	10.6085	1.35567	10.4992	11.7401	-1.24094	0.423098	Down	0.00209231	0.0140273	10.854	10.681	10.8412	10.677	9.44292	11.6031	11.68	11.7042	12.0432	11.6701
12.17_375.1485m/z	375.148	12.1693	neg	Antofloxacin	203575	HMDB0248493		Organoheterocyclic compounds	Quinolines and derivatives	Quinoline carboxylic acids	M-H	C18H21FN4O4	2.90237	9.90647	10.1292	1.35409	9.38693	10.6706	-1.28368	0.410746	Down	0.00471104	0.0243824	10.1707	9.8045	8.58379	8.8067	9.56895	10.8054	10.4632	10.3313	11.1322	10.6209
9.29_586.3503m/z	586.35	9.29045	pos	Janthitrem B	55330	HMDB0030528		Organoheterocyclic compounds	Naphthopyrans	Unclassified	M+H	C37H47NO5	-4.11779	10.515	10.5216	1.35348	12.4821	11.2595	1.22263	2.33372	Up	0.0018674	0.0130001	12.6383	12.8832	11.974	12.775	12.1401	11.8417	11.6386	10.9979	10.9181	10.9011
0.75_146.0211n	191.019	0.748717	neg	Oxoglutaric acid	46929	HMDB0000208	C00026	Organic acids and derivatives	Keto acids and derivatives	Gamma-keto acids and derivatives	M-H, M+FA-H, M-H2O-H	C5H6O5	-3.15805	19.9542	20.2094	1.35108	20.5716	19.4225	1.14904	2.21767	Up	0.0002422	0.00338995	20.8737	20.609	20.6753	20.6885	20.0112	19.0611	19.3864	19.6383	19.6668	19.36
14.88_230.1398m/z	230.14	14.8779	pos	2-Amino-3,4-dimethylimidazo[4,5-f]quinoline	54607	HMDB0029707	C19254	Organoheterocyclic compounds	Quinolines and derivatives	Unclassified	M+NH4	C12H12N4	-0.881615	9.87826	10.1403	1.35039	7.96062	9.51701	-1.55639	0.340001	Down	0.0308921	0.0916198	7.04205	7.04205	9.55547	9.1215	7.04205	9.63501	10.1704	9.23603	9.37795	9.1657
6.69_228.1358n	251.125	6.69292	pos	(-)-12-hydroxy-9,10-dihydrojasmonic acid	3372			Lipids and lipid-like molecules	Fatty Acyls	Lineolic acids and derivatives	M+Na, M+K, M+NH4, M+H, M+H-H2O	C12H20O4	-1.36176	16.9853	17.1533	1.34965	18.7226	17.4239	1.29874	2.46014	Up	0.00620366	0.0293436	18.4853	18.2388	19.5117	19.4766	17.9007	17.3543	17.8449	17.0405	17.4718	17.4077
4.30_451.1227m/z	451.123	4.29833	neg	Catechin 5-glucoside	61422	HMDB0037948		Phenylpropanoids and polyketides	Flavonoids	Flavonoid glycosides	M-H	C21H24O11	-4.17522	8.96978	7.04205	1.3467	12.6354	11.2343	1.40116	2.64113	Up	0.0144655	0.0527449	12.2068	11.6389	12.5963	13.967	12.7681	10.4976	11.2621	11.2439	11.1933	11.9744
12.34_315.2333m/z	315.233	12.3375	neg	18-Fluoro-9,10-Epoxyoctadecanoic acid	2233			Lipids and lipid-like molecules	Fatty Acyls	Fatty acids and conjugates	M-H	C18H33FO3	-2.62219	13.9563	14.1833	1.34595	12.9927	14.2614	-1.26866	0.415044	Down	0.00471878	0.0243824	13.7626	13.2767	12.6608	12.0433	13.2204	14.1949	14.3353	14.6753	14.3142	13.7872
5.61_187.0874m/z	187.087	5.61497	neg	5-Methyl-2-(4-methylphenyl)-2,4-dihydro-3H-pyrazol-3-one	302778			Benzenoids	Benzene and substituted derivatives	Toluenes	M-H	C11H12N2O	-1.77443	9.00538	7.04205	1.3419	8.62354	10.0066	-1.38307	0.383403	Down	0.0152297	0.0548791	8.90203	9.02201	7.04205	8.58141	9.57022	9.82512	9.97672	9.60395	10.2	10.4273
12.17_425.1490m/z	425.149	12.1693	neg	N-phenylanthranilic acid	209238	HMDB0255225	C13697	Benzenoids	Benzene and substituted derivatives	Benzoic acids and derivatives	2M-H	C13H11NO2	-4.00534	11.4758	11.4147	1.34178	11.0313	12.1489	-1.11767	0.460838	Down	0.000179733	0.00280062	11.2886	11.4793	10.6244	10.7131	11.0509	12.3319	12.1625	12.103	12.1078	12.0395
0.69_150.0081m/z	150.008	0.687833	pos	Ccc(C(O)=O)P(=O)=O	211442	HMDB0257815		Lipids and lipid-like molecules	Fatty Acyls	Fatty acids and conjugates	M+	C4H7O4P	-0.653818	9.87153	10.0591	1.34072	9.95487	8.57322	1.38164	2.60565	Up	0.0159068	0.0566033	9.62236	9.85879	10.1105	9.80336	10.3793	8.50487	9.64433	9.09294	7.04205	8.58191
1.26_433.0902m/z	433.09	1.26218	neg	Dopaxanthin quinone	51918	HMDB0012220		Organic acids and derivatives	Carboxylic acids and derivatives	Amino acids, peptides, and analogues	M+FA-H	C18H16N2O8	3.47354	13.1362	13.1993	1.3404	12.856	11.7773	1.07865	2.11206	Up	3.25059e-05	0.000888124	12.9055	12.6856	13.2036	12.6984	12.7868	11.9073	11.7009	11.9724	11.4777	11.8283
12.71_581.4570m/z	581.457	12.7071	neg	DG(15:0/0:0/20:5n3)	78394	HMDB0056006		Lipids and lipid-like molecules	Fatty Acyls	Eicosanoids	M-H2O-H	C38H64O5	-0.943888	11.8591	11.9234	1.34016	11.7249	10.4097	1.31512	2.48822	Up	0.00749398	0.0334572	10.8563	11.524	11.6665	12.301	12.2766	9.90483	10.4225	9.84179	11.23	10.6496
12.47_353.1432m/z	353.143	12.466	neg	4-Amino-8-(2-fluoro-6-methoxyphenyl)-N-propylcinnoline-3-carboxamide	203818	HMDB0248777		Organoheterocyclic compounds	Diazanaphthalenes	Benzodiazines	M-H	C19H19FN4O2	3.4694	17.3763	17.5006	1.34005	16.7332	17.9545	-1.22126	0.428907	Down	0.00256924	0.0161007	17.0464	17.1502	16.6405	15.7329	17.0961	18.1852	17.9013	18.0125	18.0641	17.6093
10.19_470.3842m/z	470.384	10.1933	pos	5beta-cholestan-3alpha,7alpha,12alpha,24(S),27-pentol	83574	HMDB0062416		Lipids and lipid-like molecules	Steroids and steroid derivatives	Bile acids, alcohols and derivatives	M+NH4	C27H48O5	0.419766	11.9049	12.3009	1.33914	11.6068	12.6999	-1.09318	0.468728	Down	8.21871e-05	0.00158718	11.7415	11.3321	11.6322	11.8606	11.4675	12.8266	12.2406	12.8346	12.8377	12.7602
12.73_631.4730m/z	631.473	12.7274	neg	Methyl-(5E,7E,9E,14Z,17Z) eicosapentaenoate	1507			Lipids and lipid-like molecules	Fatty Acyls	Fatty acid esters	2M-H	C21H32O2	-0.368188	13.3222	13.8851	1.33835	13.62	12.4468	1.17322	2.25514	Up	0.000789254	0.00747823	13.6451	13.497	13.652	13.5748	13.731	11.894	11.9453	12.623	12.8716	12.8999
1.45_275.0748m/z	275.075	1.45342	pos	2'-Deoxyinosine	46855	HMDB0000071	C05512	Nucleosides, nucleotides, and analogues	Purine nucleosides	Purine 2'-deoxyribonucleosides	M+Na	C10H12N4O4	-0.925008	9.19183	9.82386	1.33691	11.0896	12.5324	-1.44285	0.36784	Down	0.0213373	0.0697088	10.7496	11.2371	11.3317	10.9061	11.2234	11.2801	14.1996	11.8435	12.6302	12.7088
4.36_843.8903m/z	843.89	4.36173	neg	15-Nonacosanone	57443	HMDB0033190		Organic oxygen compounds	Organooxygen compounds	Carbonyl compounds	2M-H	C29H58O	0.102691	13.1538	14.0634	1.33376	13.4597	12.2714	1.18822	2.27872	Up	0.00173205	0.012494	13.8978	13.5917	13.4145	12.6325	13.7618	12.6035	12.5765	12.0728	12.0894	12.015
11.98_578.3484m/z	578.348	11.9811	neg	PE(22:2/0:0)	21185	HMDB0011522		Lipids and lipid-like molecules	Glycerophospholipids	Glycerophosphoethanolamines	M+FA-H	C27H52NO7P	3.93476	10.4774	10.1107	1.33321	11.5157	10.2852	1.23051	2.3465	Up	0.00302572	0.0180953	11.4975	10.81	11.9791	12.1095	11.1823	10.0782	9.82279	10.475	10.7877	10.2622
9.90_345.1670m/z	345.167	9.90245	pos	Zeranol	56980	HMDB0032702	C14752	Phenylpropanoids and polyketides	Macrolides and analogues	Unclassified	M+Na	C18H26O5	-0.794696	11.2286	10.9259	1.33211	12.8906	11.6585	1.2321	2.34909	Up	0.00412523	0.0222975	12.7912	12.3235	13.5389	13.5159	12.2837	11.5254	12.2	11.3793	11.4961	11.6918
11.46_616.2865m/z	616.287	11.4564	neg	Kinetensin 4-7	52125	HMDB0012986		Organic acids and derivatives	Carboxylic acids and derivatives	Amino acids, peptides, and analogues	M+FA-H	C26H37N9O6	2.91693	15.5803	14.7342	1.33163	15.0408	16.109	-1.06816	0.476928	Down	2.05474e-05	0.000700544	15.0811	14.9572	15.0762	15.1871	14.9026	16.3746	16.3612	16.0363	15.8653	15.9076
14.80_151.0978m/z	151.098	14.7957	pos	2-Pyrrol-1-yl-1H-imidazole	204889	HMDB0250046		Organoheterocyclic compounds	Pyrroles	Substituted pyrroles	M+NH4	C7H7N3	-0.483172	15.7215	13.8145	1.32988	16.5873	15.0685	1.51876	2.86544	Up	0.0344616	0.0991113	15.8347	17.3715	14.7995	17.1412	17.7894	14.8843	14.5903	14.9698	14.9837	15.9144
11.83_350.2707m/z	350.271	11.8343	neg	N-oleoyl L-serine	8879	HMDB0242185		Organic acids and derivatives	Carboxylic acids and derivatives	Amino acids, peptides, and analogues	M-H2O-H	C21H39NO4	1.691	9.10426	9.53112	1.32808	8.85843	10.0279	-1.1695	0.444576	Down	0.00165556	0.0121622	9.39162	8.99318	8.72575	8.23126	8.95034	9.39392	10.1214	10.2395	10.0574	10.3274
12.15_453.1963m/z	453.196	12.1486	neg	3-O-(alpha-L-arabinopyranosyl-(1->6)-beta-D-glucopyranosyl) butyl 3S-hydroxybutanoate	4555			Lipids and lipid-like molecules	Fatty Acyls	Fatty acyl glycosides	M-H	C19H34O12	-3.09512	11.4238	10.9203	1.32619	10.5802	11.8321	-1.25187	0.419904	Down	0.0066088	0.0305861	10.508	11.088	9.75066	10.3419	11.2127	11.4371	11.3816	12.5346	12.1245	11.6827
11.68_349.2826m/z	349.283	11.6822	pos	Triethanolamine Laurate	293397			Lipids and lipid-like molecules	Fatty Acyls	Fatty acids and conjugates	M+	C18H39NO5	-0.639661	11.6835	10.2015	1.32494	10.5752	11.6513	-1.07613	0.4743	Down	9.87873e-05	0.00178309	11.0481	10.7511	10.3133	10.2816	10.4818	11.7145	11.7886	11.5609	11.6046	11.5879
0.69_139.9870n	184.985	0.6901	neg	Phosphonoacetic acid	48235	HMDB0004110	C05682	Organic acids and derivatives	Organic phosphonic acids and derivatives	Organic phosphonic acids	M-H, M+FA-H	C2H5O5P	-3.10982	19.3173	18.8263	1.32479	18.5458	19.6065	-1.06071	0.479398	Down	4.03075e-05	0.00101124	18.819	18.6501	18.3099	18.2176	18.7326	19.8048	19.6392	19.5284	19.4994	19.5608
12.17_481.1810m/z	481.181	12.1693	neg	Methocarbamol	52782	HMDB0014567		Benzenoids	Phenol ethers	Anisoles	2M-H	C11H15NO5	-3.73267	12.9542	12.6894	1.32413	12.2973	13.3951	-1.09777	0.467238	Down	0.000262975	0.00361727	12.6768	12.7431	11.9498	11.9642	12.1528	13.5327	13.3874	13.4172	13.3586	13.2796
1.30_468.0682m/z	468.068	1.30498	neg	(beta-1-O-[N-(2-hydroxymethyl-3-chlorophenyl)anthraniloyl]-D-glucupyranuronic acid)	82048	HMDB0060034		Organic oxygen compounds	Organooxygen compounds	Carbohydrates and carbohydrate conjugates	M-H	C20H20ClNO10	-4.47273	13.1785	13.1199	1.32393	12.0394	10.9711	1.06835	2.09704	Up	8.6253e-05	0.00163968	11.882	12.151	12.205	11.8843	12.0748	10.8123	11.4816	10.759	10.9261	10.8765
10.41_241.1810m/z	241.181	10.4078	neg	12-Tridecen-2-one	9959			Organic oxygen compounds	Organooxygen compounds	Carbonyl compounds	M+FA-H	C13H24O	0.366458	12.3033	12.2459	1.32301	11.943	13.2194	-1.27645	0.412811	Down	0.00871526	0.0370631	11.9106	11.8869	11.8046	11.7718	12.3411	12.7006	12.2115	13.1793	13.9163	14.0895
0.70_113.0591n	114.066	0.69945	pos	Creatinine	47093	HMDB0000562	C00791	Organic acids and derivatives	Carboxylic acids and derivatives	Amino acids, peptides, and analogues	M+H, M+K	C4H7N3O	1.6773	13.3119	15.3805	1.32175	14.4521	13.0646	1.38754	2.61631	Up	0.0195024	0.0654291	15.9755	14.4281	14.7726	13.8766	13.2078	13.0509	13.4274	12.7509	13.0037	13.0901
10.77_430.1779m/z	430.178	10.7668	neg	Bifeprunox	204180	HMDB0249198		Benzenoids	Benzene and substituted derivatives	Biphenyls and derivatives	M+FA-H	C24H23N3O2	1.80747	9.99251	9.35711	1.32121	9.19782	10.6789	-1.48106	0.358227	Down	0.0320106	0.0936145	10.1235	9.56288	10.0172	9.24345	7.04205	10.4331	10.9877	10.4952	10.8433	10.6351
6.04_281.1010m/z	281.101	6.04295	neg	2-[(2,6-Dioxocyclohexyl)methyl]cyclohexane-1,3-dione	203606	HMDB0248526		Organic oxygen compounds	Organooxygen compounds	Carbonyl compounds	M+FA-H	C13H16O4	-8.86732	13.1337	13.3832	1.32079	14.5257	13.3667	1.15892	2.2329	Up	0.00156387	0.0117482	14.305	13.9758	14.8662	15.0587	14.4226	12.9536	13.8315	13.1309	13.4396	13.4781
13.30_305.2490m/z	305.249	13.2962	neg	eicosa-5Z,8Z,14Z-trienoic acid	1180			Lipids and lipid-like molecules	Fatty Acyls	Fatty acids and conjugates	M-H	C20H34O2	1.38982	15.924	16.068	1.31876	15.2719	16.4734	-1.20147	0.434831	Down	0.00343775	0.0198454	15.6781	15.667	15.3593	14.2777	15.3774	16.7056	16.4579	16.6336	16.63	15.9398
1.26_405.0669m/z	405.067	1.26218	neg	4-Methylgallic acid 3-glucuronide	197121	HMDB0240462		Phenylpropanoids and polyketides	Tannins	Hydrolyzable tannins	M+FA-H	C14H16O11	-1.44119	10.9659	11.1003	1.31771	10.9179	9.66846	1.24944	2.3775	Up	0.00548785	0.0269263	11.2985	10.9475	11.5128	10.5773	10.2535	8.83998	9.70095	9.91702	10.2914	9.59292
1.30_335.0615m/z	335.062	1.30498	neg	Glucose pyruvate lactate	207224	HMDB0252788		Organic oxygen compounds	Organooxygen compounds	Carbohydrates and carbohydrate conjugates	M-H2O-H	C12H18O12	-1.23122	17.4764	17.6511	1.31551	17.2156	16.1592	1.05645	2.0798	Up	7.18244e-05	0.00144701	17.4337	17.1442	17.4957	17.105	16.8995	16.37	15.8527	16.2484	16.2374	16.0873
5.67_389.1364m/z	389.136	5.67172	neg	Sabiporide	211122	HMDB0257436		Organoheterocyclic compounds	Diazinanes	Piperazines	M-H2O-H	C18H19F3N6O2	5.01691	10.2565	9.56483	1.31542	9.37859	10.5505	-1.17196	0.443819	Down	0.00216621	0.0144025	9.81532	9.36317	9.61055	8.44959	9.65435	10.8139	10.3987	10.2493	10.582	10.7088
12.07_312.2549m/z	312.255	12.0655	neg	N-palmitoyl glycine	8656	HMDB0013034		Organic acids and derivatives	Carboxylic acids and derivatives	Amino acids, peptides, and analogues	M-H	C18H35NO3	1.51728	13.3785	13.1082	1.31538	13.0666	14.1699	-1.10331	0.465446	Down	0.000593367	0.00639616	13.0909	13.2515	12.8751	12.7551	13.3606	13.5072	14.3351	14.4069	14.2717	14.3288
4.51_197.0817m/z	197.082	4.50885	neg	4-hydroxy Nonenal Alkyne	267459			Lipids and lipid-like molecules	Fatty Acyls	Fatty alcohols	M+FA-H	C9H12O2	-1.79368	8.67325	8.61434	1.31387	9.79029	8.5536	1.23669	2.35658	Up	0.0064992	0.0302973	9.81531	9.40959	10.352	10.613	8.76161	8.53359	8.80188	8.38561	8.45829	8.58863
9.05_358.2946m/z	358.295	9.05247	pos	10-Methyldodecanoylcarnitine	197376	HMDB0240820		Lipids and lipid-like molecules	Fatty Acyls	Fatty acid esters	M+H	C20H39NO4	-1.6493	14.1839	13.6493	1.31176	13.1662	14.2145	-1.04827	0.483546	Down	8.08314e-05	0.00158507	13.3299	13.1827	13.2463	13.0317	13.0406	14.0437	13.9029	14.0734	14.5212	14.5315
12.10_368.2616m/z	368.262	12.1013	pos	N-Oleoyl Cysteine	198475	HMDB0241957		Organic acids and derivatives	Carboxylic acids and derivatives	Amino acids, peptides, and analogues	M+H-H2O	C21H39NO3S	-0.3946	12.9051	12.6642	1.31156	12.7987	13.8276	-1.0289	0.490083	Down	2.17358e-05	0.000716564	12.8037	12.7709	12.6364	12.6359	13.1466	14.0257	13.6403	13.7226	13.9401	13.8093
4.21_583.2402m/z	583.24	4.20888	pos	Pyripyropene-A	534739			Lipids and lipid-like molecules	Steroids and steroid derivatives	Hydroxysteroids	M+	C31H37NO10	-2.62979	9.49313	11.6916	1.31027	11.1326	9.91024	1.2224	2.33334	Up	0.00503731	0.025339	10.3783	11.4349	11.4717	10.8296	11.5488	9.23452	10.1846	9.74261	10.5675	9.82193
14.97_97.0763m/z	97.0763	14.9734	pos	L-prolinamide	208155	HMDB0253910		Organic acids and derivatives	Carboxylic acids and derivatives	Amino acids, peptides, and analogues	M+H-H2O	C5H10N2O	2.6034	15.9919	14.0641	1.31024	16.778	15.2998	1.47821	2.78602	Up	0.0349721	0.100146	16.0726	17.5063	15.0378	17.2915	17.9816	15.1694	14.7373	15.1884	15.2765	16.1272
5.64_439.2327m/z	439.233	5.63575	neg	[6]-Gingerdiol 4'-O-beta-D-glucopyranoside	59915	HMDB0036122		Organic oxygen compounds	Organooxygen compounds	Carbohydrates and carbohydrate conjugates	M-H2O-H	C23H38O9	-2.36607	12.1662	11.4464	1.30979	11.353	12.4838	-1.13081	0.456659	Down	0.00124614	0.0101653	11.4629	11.3015	11.1414	10.8683	11.9909	12.2649	12.6964	12.0772	12.558	12.8226
12.37_309.2419m/z	309.242	12.3742	pos	11-(3-methyl-5-propylfuran-2-yl)-undecanoic acid	2631	HMDB0061646		Lipids and lipid-like molecules	Fatty Acyls	Fatty acids and conjugates	M+H	C19H32O3	-1.53629	10.3632	10.7359	1.30606	10.5862	11.7958	-1.20954	0.432407	Down	0.0050934	0.0255567	11.0758	11.0725	10.0943	10.4954	10.1932	12.2496	11.3711	12.4362	11.2327	11.6892
12.95_307.2631m/z	307.263	12.9475	pos	9Z,11Z,14Z-Eicosatrienoic acid	1414			Lipids and lipid-like molecules	Fatty Acyls	Fatty acids and conjugates	M+H	C20H34O2	-0.127015	9.47293	9.86803	1.30533	8.78553	10.1584	-1.3729	0.386114	Down	0.0218866	0.0709447	9.84072	9.12765	9.00296	7.04205	8.91426	10.3203	10.2341	10.4123	9.65784	10.1675
12.44_360.2564m/z	360.256	12.4361	pos	Anacardic acid	35213			Benzenoids	Benzene and substituted derivatives	Benzoic acids and derivatives	M+NH4	C22H30O3	8.98937	11.5303	11.1557	1.30519	11.1764	12.3646	-1.18819	0.438852	Down	0.00409856	0.0222438	11.8386	11.6613	10.6307	10.5153	11.2359	12.7974	12.3323	12.2392	12.486	11.9679
11.71_574.3843m/z	574.384	11.7052	pos	Butanoyl PAF	273690			Lipids and lipid-like molecules	Glycerophospholipids	Glycerophosphocholines	M+Na	C28H58NO7P	-0.0314155	12.1866	12.9096	1.30328	12.2874	11.1325	1.15484	2.2266	Up	0.00240991	0.0154079	12.3849	12.3184	12.2371	12.3642	12.1323	10.4494	11.2328	11.0017	10.9366	12.0422
12.19_354.1511m/z	354.151	12.1899	neg	1,3-Dibenzylisoquinoline	204244	HMDB0249266		Phenylpropanoids and polyketides	Diarylheptanoids	Linear diarylheptanoids	M+FA-H	C23H19N	3.69605	9.67641	9.94693	1.30228	10.6106	9.4609	1.14968	2.21865	Up	0.00207067	0.0139056	10.6252	10.7897	10.6393	10.486	10.5127	8.80376	9.16056	9.43984	9.58905	10.3113
12.71_429.1559m/z	429.156	12.7071	neg	Kanzonol N	64208	HMDB0041100		Phenylpropanoids and polyketides	Isoflavonoids	O-methylated isoflavonoids	M+FA-H	C22H24O6	0.974018	15.3479	14.9726	1.30152	14.6818	15.7508	-1.06904	0.476635	Down	0.000347765	0.00444626	15.3036	14.5439	14.6902	14.3243	14.5469	15.7224	15.9558	15.8631	15.6011	15.6117
9.73_299.2596m/z	299.26	9.7255	neg	11Z-heptadecen-1-ol	6032			Lipids and lipid-like molecules	Fatty Acyls	Fatty alcohols	M+FA-H	C17H34O	1.70133	12.1901	11.7599	1.30124	11.7055	12.6923	-0.986776	0.504604	Down	9.64323e-07	0.000101229	11.7135	11.763	11.751	11.7703	11.5298	12.6386	12.4931	12.7663	12.7307	12.8328
12.40_463.2090m/z	463.209	12.4039	neg	Na-Hexanoyl-Nb-inosityltryptophan	62776	HMDB0039501		Organic acids and derivatives	Carboxylic acids and derivatives	Amino acids, peptides, and analogues	M-H	C23H32N2O8	0.818778	17.8647	17.8149	1.30002	16.9959	18.1248	-1.12895	0.457249	Down	0.00181495	0.0128458	17.724	16.8904	16.8692	16.414	17.0818	18.5	17.8988	18.3279	18.0483	17.8493
11.37_363.2161m/z	363.216	11.3736	neg	4,5-LTA4	3867	HMDB0302077	C02645	Lipids and lipid-like molecules	Fatty Acyls	Fatty acids and conjugates	M+FA-H	C20H30O3	-4.98251	10.8825	10.483	1.29892	10.5869	11.6755	-1.08865	0.470201	Down	0.000787133	0.00747589	10.7755	10.7591	10.606	10.3046	10.4893	11.2024	11.4261	11.5396	11.9694	12.2402
9.14_498.1663m/z	498.166	9.14367	neg	Fluphenazine sulfoxide	206892	HMDB0252402		Organoheterocyclic compounds	Benzothiazines	Phenothiazines	M+FA-H	C22H26F3N3O2S	-3.73427	10.4251	10.3359	1.29772	10.2149	11.3318	-1.11685	0.461099	Down	0.00121728	0.00997067	10.3525	10.1156	10.8511	9.57924	10.1761	11.4416	11.6589	11.1551	11.3072	11.0961
14.47_383.1904m/z	383.19	14.4675	neg	(5S,6R)-Methyl 5,6,7-trihydroxyheptanoate	202629	HMDB0247393		Lipids and lipid-like molecules	Fatty Acyls	Fatty alcohols	2M-H	C8H16O5	-4.87417	18.6586	18.1234	1.29725	18.2768	19.2918	-1.01499	0.494831	Down	3.5034e-05	0.000919576	18.4386	18.3432	18.4036	18.2151	17.9836	18.9818	19.3718	19.4156	19.1982	19.4915
12.77_429.1747m/z	429.175	12.7666	neg	Cissoic acid	2952			Lipids and lipid-like molecules	Fatty Acyls	Fatty acyl glycosides	M-H	C20H30O10	-4.47543	18.3265	17.946	1.29609	17.5982	18.6768	-1.07861	0.473485	Down	0.000667493	0.00684356	17.933	17.6311	17.9497	16.9787	17.4982	18.4361	18.728	18.8445	18.8957	18.4795
9.46_297.2076m/z	297.208	9.45513	neg	3Z,9Z-hexadecadienoic acid	766			Lipids and lipid-like molecules	Fatty Acyls	Fatty acids and conjugates	M+FA-H	C16H28O2	1.90426	10.2204	9.73852	1.29522	11.0856	12.4826	-1.39702	0.379712	Down	0.0295348	0.0888493	11.7697	11.8592	10.675	9.26806	11.856	12.5568	12.9568	12.1666	12.5842	12.1487
11.46_565.2891m/z	565.289	11.4564	neg	Hordatine A	55274	HMDB0030461	C08307	Phenylpropanoids and polyketides	2-arylbenzofuran flavonoids	Unclassified	M-H	C28H38N8O5	-0.294066	12.1697	11.2055	1.29488	11.8461	12.8485	-1.00245	0.499151	Down	1.54925e-05	0.000605878	11.9791	11.6535	11.8586	12.1326	11.6065	12.8822	12.995	12.8636	12.7575	12.7444
1.08_347.0403m/z	347.04	1.07693	neg	Inosinic acid	46911	HMDB0000175	C00130	Nucleosides, nucleotides, and analogues	Purine nucleotides	Purine ribonucleotides	M-H	C10H13N4O8P	1.49996	16.758	16.2426	1.29321	17.2445	16.1159	1.12855	2.1864	Up	0.0016488	0.0121572	17.1002	17.3084	16.9395	16.8841	17.9901	15.7093	15.8703	16.2974	16.4053	16.2974
5.35_189.1130m/z	189.113	5.3468	neg	5R-Hydroxy-4S-methylheptan-3-one	9907			Organic oxygen compounds	Organooxygen compounds	Carbonyl compounds	M+FA-H	C8H16O2	-1.67606	8.52968	8.53556	1.2932	8.84068	7.61252	1.22816	2.34269	Up	0.00949704	0.0393801	8.7518	8.92126	8.73579	9.11702	8.67755	8.30148	7.04205	7.04205	7.04205	8.63498
4.91_201.1130m/z	201.113	4.91028	neg	9,10-dihydroxy-2-decenoic acid	1900			Organic acids and derivatives	Hydroxy acids and derivatives	Medium-chain hydroxy acids and derivatives	M-H	C10H18O4	-1.11098	11.1893	11.0153	1.29198	11.6426	10.5855	1.05713	2.08079	Up	0.00042969	0.00513183	11.867	11.2838	12.0661	11.7995	11.1965	10.6749	10.7809	10.5966	10.4827	10.3921
12.40_427.1589m/z	427.159	12.4039	neg	Crosatoside B	62540	HMDB0039253		Organic oxygen compounds	Organooxygen compounds	Carbohydrates and carbohydrate conjugates	M-H2O-H	C20H30O11	-4.67999	19.7479	19.8159	1.29162	18.7689	19.9817	-1.21285	0.431415	Down	0.00810536	0.0352973	19.8168	18.6971	18.5993	17.8347	18.8965	20.2033	19.5007	20.2603	20.085	19.8594
9.07_559.3272n	560.334	9.0732	pos	PC(0:0/20:4;O)	27870			Lipids and lipid-like molecules	Glycerophospholipids	Glycerophosphocholines	M+H, M+Na	C28H50NO8P	-0.388538	12.1803	14.2476	1.29012	15.4068	14.2743	1.13252	2.19241	Up	0.00247465	0.0157188	16.2011	15.602	14.9452	15.0725	15.2132	14.6581	14.4885	14.1383	13.9677	14.1188
3.95_587.1165m/z	587.117	3.94888	pos	Daidzein 7-O-apiosyl-(1->6)-glucoside	29161			Phenylpropanoids and polyketides	Isoflavonoids	Isoflavonoid O-glycosides	M+K	C26H28O13	0.726214	11.0763	11.8451	1.2896	11.5319	12.5823	-1.05044	0.48282	Down	0.000373327	0.00466834	11.615	11.8125	11.3811	11.1121	11.7386	12.5817	12.6299	13.0205	12.3589	12.3206
12.32_373.2756m/z	373.276	12.3167	neg	15-Oxo-5beta-cholan-24-oic Acid	46201			Lipids and lipid-like molecules	Steroids and steroid derivatives	Bile acids, alcohols and derivatives	M-H	C24H38O3	2.00593	9.3424	9.64073	1.28911	8.95444	10.1137	-1.15927	0.447739	Down	0.00383752	0.0212842	8.42806	8.77618	9.78452	8.58257	9.20086	9.77724	9.81506	10.6072	10.1146	10.2545
11.91_415.1829m/z	415.183	11.9131	pos	DAPT	274647			Organic acids and derivatives	Carboxylic acids and derivatives	Amino acids, peptides, and analogues	M+H-H2O	C23H26F2N2O4	0.209155	11.9191	11.7082	1.28909	10.6168	11.6697	-1.0529	0.481999	Down	0.000387243	0.00476919	10.9598	10.9847	10.637	10.1269	10.3754	11.7551	11.6068	11.448	11.8649	11.6735
9.71_473.2647m/z	473.265	9.71457	pos	PA(19:1/0:0)	26089			Lipids and lipid-like molecules	Glycerophospholipids	Glycerophosphates	M+Na	C22H43O7P	1.82008	11.0998	11.5359	1.28655	11.639	10.6529	0.986138	1.98087	Up	1.35743e-05	0.000552529	11.6064	11.7436	11.5711	11.4084	11.8655	10.9109	10.5267	10.5476	10.6927	10.5865
15.31_183.0862m/z	183.086	15.3127	pos	D-Sorbitol	46956	HMDB0000247	C00794	Organic oxygen compounds	Organooxygen compounds	Carbohydrates and carbohydrate conjugates	M+H	C6H14O6	-0.709359	18.1994	17.1424	1.2862	19.1338	17.7713	1.36251	2.57131	Up	0.0257004	0.0799679	18.1121	19.6996	17.8683	20.0319	19.9573	18.0228	17.2087	17.676	17.8216	18.1276
12.95_363.1828m/z	363.183	12.9475	pos	Dioncophylline C	206053	HMDB0251431		Organoheterocyclic compounds	Isoquinolines and derivatives	Naphthylisoquinolines	M+	C23H25NO3	-1.90263	10.5087	10.9209	1.2838	9.31436	10.532	-1.21768	0.429975	Down	0.00993974	0.0406246	10.1956	9.69533	8.79535	8.24291	9.64262	10.6396	10.3299	10.4269	10.8525	10.4113
11.98_449.1493m/z	449.149	11.9811	neg	Methyl 3-carbazolecarboxylate	54641	HMDB0029744		Organoheterocyclic compounds	Indoles and derivatives	Carbazoles	2M-H	C14H11NO2	-3.01739	12.4212	12.5039	1.28314	11.2551	12.3181	-1.06298	0.478642	Down	0.000725145	0.00714769	11.5001	11.618	11.4156	10.5101	11.2319	12.2403	12.2208	12.3215	12.4106	12.3974
3.95_249.0340m/z	249.034	3.95027	neg	Rapalexin A	255091	HMDB0302104		Organoheterocyclic compounds	Indoles and derivatives	Indoles	M+FA-H	C10H8N2OS	0.481845	9.33655	7.04205	1.28062	9.70006	8.278	1.42206	2.67969	Up	0.0421206	0.114221	9.84517	9.24846	10.6283	9.26348	9.51489	9.01734	9.65201	7.04205	8.63655	7.04205
7.21_491.2255m/z	491.225	7.20647	neg	Corticosterone-21-hemisuccinate	205240	HMDB0250465		Lipids and lipid-like molecules	Steroids and steroid derivatives	Pregnane steroids	M+FA-H	C25H34O7	-7.15145	9.83916	9.75531	1.28047	9.29572	10.7302	-1.43451	0.369972	Down	0.0419657	0.113956	10.0993	9.49429	9.72132	7.04205	10.1216	10.4717	11.1986	10.8961	10.6568	10.4281
1.14_337.0450m/z	337.045	1.13785	neg	Imidazoleacetic acid ribotide	48655	HMDB0006032	C04437	Organic oxygen compounds	Organooxygen compounds	Carbohydrates and carbohydrate conjugates	M-H	C10H15N2O9P	2.27826	13.5361	14.0291	1.28008	13.9096	12.7433	1.16632	2.24438	Up	0.00469466	0.0243524	13.8682	13.5434	14.1864	13.9955	13.9547	11.8618	12.3939	12.9758	12.9815	13.5037
10.95_472.1937m/z	472.194	10.9461	neg	Ketotrexate	208081	HMDB0253793		Organic acids and derivatives	Carboxylic acids and derivatives	Amino acids, peptides, and analogues	M-H	C21H27N7O6	-2.81108	12.6684	11.2789	1.27888	11.4054	12.712	-1.30669	0.404246	Down	0.0198804	0.066196	12.0334	10.069	12.1015	11.993	10.8299	12.6744	13.1181	13.1698	12.3196	12.2783
4.89_197.0817m/z	197.082	4.88523	neg	Modiolide A	7883			Organoheterocyclic compounds	Oxocins	Unclassified	M-H	C10H14O4	-1.34177	8.83714	8.75573	1.27807	9.86523	8.78242	1.08281	2.11816	Up	0.0015788	0.0118219	9.55296	9.30884	10.3941	10.3828	9.68746	8.93581	8.87257	8.81253	8.72833	8.56285
10.67_247.1691m/z	247.169	10.6657	pos	Alepric acid	689			Lipids and lipid-like molecules	Fatty Acyls	Fatty acids and conjugates	M+Na	C14H24O2	9.97813	8.559	8.8358	1.27782	10.4023	9.27059	1.13167	2.19113	Up	0.00365107	0.0206583	10.117	10.2515	10.9791	10.9208	9.74294	8.76712	9.5327	9.12821	9.46698	9.45795
6.67_321.1348m/z	321.135	6.66825	neg	Acetylpterosin C	55511	HMDB0030764		Benzenoids	Indanes	Indanones	M+FA-H	C16H20O4	1.45324	7.04205	7.04205	1.27608	8.61538	9.89356	-1.27818	0.412315	Down	0.0163814	0.0575729	8.8468	9.18518	9.09966	7.04205	8.9032	10.403	9.90033	9.89683	9.64636	9.62127
11.04_522.2831m/z	522.283	11.0362	pos	PG(18:4/0:0)	23683			Lipids and lipid-like molecules	Glycerophospholipids	Glycerophosphoglycerols	M+NH4	C24H41O9P	0.849309	14.3277	13.732	1.27577	13.9632	14.9812	-1.01802	0.493793	Down	0.000215741	0.00314084	14.1467	14.3642	13.8682	13.5692	13.8675	15.0365	15.2003	14.6921	15.0519	14.9253
4.79_238.0335m/z	238.033	4.79337	neg	Flosequinan	206809	HMDB0252316		Organoheterocyclic compounds	Quinolines and derivatives	Quinolones and derivatives	M-H	C11H10FNO2S	-3.72006	7.04205	7.04205	1.27562	8.46296	7.04205	1.42091	2.67755	Up	0.0426178	0.115256	7.04205	7.04205	9.59889	9.61466	9.01716	7.04205	7.04205	7.04205	7.04205	7.04205
1.30_427.1084m/z	427.108	1.29813	pos	1,2-Diphenyl-4-(2''-phenylsulfinethyl)-3,5-pyrazolidinedione	203938	HMDB0248909		Organoheterocyclic compounds	Azoles	Pyrazoles	M+Na	C23H20N2O3S	-0.620367	15.5771	16.3242	1.275	15.4859	14.3521	1.13378	2.19433	Up	0.00377268	0.0210478	15.7218	15.6403	15.9774	14.9751	15.1148	14.9023	13.8626	14.4193	14.6792	13.8969
11.98_402.1507n	401.143	11.9811	neg	Benzyl 6-O-beta-D-apiofuranosyl-beta-D-glucoside	255946	HMDB0303056		Organic oxygen compounds	Organooxygen compounds	Carbohydrates and carbohydrate conjugates	M-H, M+FA-H	C18H26O10	-4.78766	15.9373	15.4988	1.27386	14.621	15.6902	-1.0692	0.476584	Down	0.00137445	0.010814	15.0624	14.8618	14.6673	13.9716	14.5417	15.536	15.3875	15.5546	16.035	15.9376
12.73_379.1588m/z	379.159	12.7274	neg	Ecabet	53647	HMDB0015613		Lipids and lipid-like molecules	Prenol lipids	Diterpenoids	M-H	C20H28O5S	0.969118	19.535	18.9678	1.27213	18.8707	19.8286	-0.957985	0.514775	Down	1.03569e-05	0.000486043	19.0939	18.817	18.9242	18.6497	18.8685	19.6979	19.914	19.9888	19.8988	19.6436
4.87_360.2148m/z	360.215	4.87445	pos	Asp-Leu-Leu	265707			Organic acids and derivatives	Carboxylic acids and derivatives	Amino acids, peptides, and analogues	M+H	C16H29N3O6	5.38399	9.50429	8.89171	1.27201	9.05213	10.2375	-1.18539	0.439705	Down	0.00845034	0.0363629	9.80552	8.61034	8.94158	8.4928	9.41042	9.62493	10.4204	10.6141	9.73182	10.7964
12.21_431.1649m/z	431.165	12.213	neg	Thiobenzyl benzyloxycarbonyl-L-lysinate	204268	HMDB0249294		Benzenoids	Benzene and substituted derivatives	Benzyloxycarbonyls	M+FA-H	C21H26N2O3S	0.659863	10.6393	10.5131	1.27186	10.3432	11.3247	-0.981525	0.506444	Down	3.30026e-05	0.00089556	10.2647	10.5021	10.64	10.2048	10.1042	11.5545	11.2716	11.2013	11.2254	11.3707
4.08_615.3495m/z	615.35	4.07733	neg	Gestrinone	47979	HMDB0002720		Lipids and lipid-like molecules	Steroids and steroid derivatives	Estrane steroids	2M-H	C21H24O2	2.5177	10.6357	11.5645	1.2714	10.9772	9.87165	1.10551	2.15175	Up	0.00308414	0.0183075	10.9783	10.6231	11.6119	10.6106	11.062	9.88559	9.70833	9.44688	9.73587	10.5816
10.44_424.2819m/z	424.282	10.4394	pos	Pentadecanoylcarnitine	83633	HMDB0062517		Lipids and lipid-like molecules	Fatty Acyls	Fatty acid esters	M+K	C22H43NO4	-1.28435	12.3816	11.1295	1.27062	11.5526	12.4971	-0.944497	0.519611	Down	1.53852e-06	0.000130578	11.681	11.5387	11.3662	11.5258	11.6514	12.6951	12.4887	12.4403	12.4442	12.4173
4.25_305.1240n	350.122	4.25205	neg	m-Hydroxybenzoylecgonine	208426	HMDB0254275		Benzenoids	Benzene and substituted derivatives	Benzoic acids and derivatives	M+FA-H, 2M-H	C16H19NO5	-7.77284	10.8022	10.8579	1.26875	10.9473	9.89772	1.04963	2.06999	Up	0.000721969	0.00714624	10.8022	10.8525	10.7402	11.1204	11.2216	9.98695	9.34084	9.84543	10.4298	9.88553
2.20_115.0393m/z	115.039	2.19542	neg	3-Methyl-2-oxobutanoic acid	348	HMDB0000019	C00141	Organic acids and derivatives	Keto acids and derivatives	Short-chain keto acids and derivatives	M-H	C5H8O3	-6.81815	12.5163	12.5327	1.26746	12.9971	12.0188	0.978324	1.97018	Up	4.61312e-05	0.00110854	12.982	13.0282	12.5666	13.1142	13.2945	11.9392	11.9882	12.096	12.0601	12.0104
12.42_599.5034m/z	599.503	12.4154	pos	DG(18:0/0:0/18:4n3)	78444	HMDB0056057		Lipids and lipid-like molecules	Fatty Acyls	Lineolic acids and derivatives	M+H-H2O	C39H68O5	-0.0171161	13.0917	13.5134	1.2664	13.2999	14.4544	-1.15458	0.449198	Down	0.00623423	0.0293952	13.2958	13.438	13.0601	12.8432	13.8622	14.9977	14.8206	14.5743	14.3846	13.4949
2.24_240.1017m/z	240.102	2.24	pos	2,3-Bis(4-hydroxyphenyl)propionitrile	200103	HMDB0244616		Phenylpropanoids and polyketides	Stilbenes	Unclassified	M+H	C15H13NO2	-0.676255	11.5493	10.7619	1.26551	10.2326	11.2911	-1.0585	0.48013	Down	0.00119346	0.00985654	9.8985	10.5994	10.6419	10.2172	9.80609	11.0546	11.0242	11.552	11.175	11.6498
10.42_217.1586m/z	217.159	10.4189	pos	Isocurcumenol	60329	HMDB0036647		Lipids and lipid-like molecules	Prenol lipids	Sesquiterpenoids	M+H-H2O	C15H22O2	-0.568972	9.7945	9.60832	1.26501	11.1094	9.92608	1.18328	2.27093	Up	0.00997094	0.0406688	10.8	10.7041	11.7496	11.9113	10.3818	10.0947	10.3719	9.47984	10.1594	9.52458
0.73_337.0781m/z	337.078	0.733133	neg	Aldobiouronic acid	255793	HMDB0302892		Organic oxygen compounds	Organooxygen compounds	Carbohydrates and carbohydrate conjugates	M-H2O-H	C12H20O12	1.17609	14.8997	15.9757	1.26464	15.7526	14.811	0.941536	1.92057	Up	4.40619e-06	0.000258037	15.622	15.7599	15.9141	15.7564	15.7104	15.0202	14.7133	14.8288	14.8911	14.6017
12.37_311.1640m/z	311.164	12.3742	pos	2-Hydroxy-3,6-diphenylcyclohexyl acetate	534713			Organic oxygen compounds	Organooxygen compounds	Alcohols and polyols	M+H	C20H22O3	-0.569545	10.9823	10.4279	1.26427	10.2551	11.2849	-1.02979	0.489781	Down	0.000643096	0.00669794	10.6034	10.2963	10.1635	9.93574	10.2765	11.7072	11.4198	11.3375	11.2114	10.7484
11.08_690.3243m/z	690.324	11.0762	neg	OKODiA-PS	27964			Lipids and lipid-like molecules	Glycerophospholipids	Glycerophosphoserines	M-H	C32H54NO13P	-2.4048	13.0782	12.1503	1.2629	12.0931	13.0429	-0.949721	0.517732	Down	1.12621e-05	0.000508607	12.2698	11.9435	12.1838	12.2513	11.8173	13.0575	13.1465	12.9281	13.1029	12.9794
13.53_282.2562n	281.249	13.532	neg	Petroselinic acid	47796	HMDB0002080		Lipids and lipid-like molecules	Fatty Acyls	Fatty acids and conjugates	M-H, M+FA-H	C18H34O2	1.21319	17.7854	18.2844	1.2618	17.199	18.253	-1.05396	0.481644	Down	0.00152441	0.0115524	17.478	17.2625	16.9899	16.8129	17.4519	18.496	18.3993	18.3188	18.5128	17.5381
10.23_429.3670m/z	429.367	10.2335	pos	(9E)-Heptadec-9-enoylcarnitine	198059	HMDB0241516		Lipids and lipid-like molecules	Fatty Acyls	Fatty acid esters	M+NH4	C24H45NO4	-4.19973	7.04205	8.79403	1.26148	8.02918	9.38448	-1.3553	0.390853	Down	0.0346748	0.0995093	7.04205	8.97446	8.31555	8.77181	7.04205	8.53242	8.69324	9.52573	10.0197	10.1513
9.12_213.1495m/z	213.149	9.12313	neg	10-Undecen-2-one	9951	HMDB0033577		Organic oxygen compounds	Organooxygen compounds	Carbonyl compounds	M+FA-H	C11H20O	-0.797846	12.2231	11.6529	1.26139	11.5353	12.723	-1.18763	0.439025	Down	0.010992	0.0435356	11.4073	11.7984	11.473	11.2095	11.7885	12.4859	11.7219	12.4283	13.3806	13.5981
6.48_227.0901m/z	227.09	6.48207	neg	Dacarbazine	257775		C06936	Organic acids and derivatives	Carboxylic acids and derivatives	Carboxylic acid derivatives	M+FA-H	C6H10N6O	1.52965	8.75155	9.2083	1.26108	8.74695	7.58058	1.16637	2.24447	Up	0.00775253	0.0342847	8.70546	8.69228	8.76242	8.80234	8.77228	8.35712	7.04205	7.04205	8.41965	7.04205
12.17_377.1433m/z	377.143	12.1693	neg	Pradofloxacin	210538	HMDB0256725		Organoheterocyclic compounds	Quinolines and derivatives	Quinoline carboxylic acids	M-H2O-H	C21H21FN4O3	3.52926	15.6889	15.4956	1.2591	15.1375	16.1114	-0.97398	0.5091	Down	0.000135299	0.00229663	15.4311	15.4409	14.8284	14.8551	15.1318	16.0703	15.9881	16.0593	16.2955	16.144
15.19_597.4870m/z	597.487	15.1932	neg	Pentadecanoylglycine	52239	HMDB0013300		Organic acids and derivatives	Carboxylic acids and derivatives	Amino acids, peptides, and analogues	2M-H	C17H33NO3	3.6646	13.7339	12.7587	1.25871	12.7324	13.7864	-1.05396	0.481643	Down	0.00196655	0.0135018	12.9645	12.8049	12.7281	12.4426	12.722	13.1013	13.481	13.9484	14.2883	14.1129
5.64_390.2626n	371.245	5.63575	neg	bhos#24	10342			Lipids and lipid-like molecules	Fatty Acyls	Fatty acids and conjugates	M-H2O-H, M-H	C20H38O7	2.19949	14.382	13.8293	1.25766	13.6486	14.7113	-1.06265	0.478753	Down	0.00193247	0.0133367	13.7793	13.7208	13.5032	13.0304	14.2094	14.4326	14.9362	14.3656	14.7797	15.0423
0.77_251.0695m/z	251.069	0.774633	pos	gamma-Glutamylcysteine	47363	HMDB0001049	C00669	Organic acids and derivatives	Carboxylic acids and derivatives	Amino acids, peptides, and analogues	M+H	C8H14N2O5S	-0.61811	10.4097	10.7467	1.25642	11.1298	12.4926	-1.3628	0.388826	Down	0.0392692	0.10916	11.7386	12.4278	10.5735	9.77251	11.1367	11.4537	12.8763	12.1568	12.7683	13.2078
15.35_83.0496m/z	83.0496	15.3534	pos	3-Methylbut-2-enoic acid	192	HMDB0000509		Lipids and lipid-like molecules	Fatty Acyls	Fatty acids and conjugates	M+H-H2O	C5H8O2	4.14305	13.2484	11.9078	1.25006	14.1744	12.8497	1.3247	2.5048	Up	0.0319678	0.0936053	13.3042	14.8154	12.7858	14.8457	15.121	13.0602	12.2176	12.7637	12.7899	13.4172
10.99_624.3538m/z	624.354	10.9931	neg	Am-LPE(18:0/0:0)	28116			Organic oxygen compounds	Organooxygen compounds	Carbohydrates and carbohydrate conjugates	M-H2O-H	C29H58NO12P	3.05715	10.8857	10.6818	1.24998	11.9605	10.8679	1.09252	2.13246	Up	0.00408403	0.0222438	11.6792	11.6464	12.59	12.5121	11.3746	10.5152	11.001	10.7961	11.2358	10.7915
3.75_281.1131m/z	281.113	3.74935	pos	L-beta-aspartyl-L-phenylalanine	51185	HMDB0011167		Organic acids and derivatives	Peptidomimetics	Hybrid peptides	M+H	C13H16N2O5	-0.429462	9.34012	9.75162	1.24893	9.91714	8.77719	1.13995	2.20373	Up	0.00860368	0.036706	9.63417	10.6636	10.4146	9.16206	9.71122	9.25077	8.26376	8.77454	8.49154	9.10533
2.47_248.0236m/z	248.024	2.4651	neg	Cystathionine ketimine	47761	HMDB0002015		Organic acids and derivatives	Carboxylic acids and derivatives	Amino acids, peptides, and analogues	M+FA-H	C7H9NO4S	0.673575	8.70785	7.04205	1.24863	11.2172	12.4337	-1.21646	0.430337	Down	0.0186563	0.0635906	11.2051	11.2881	9.9807	11.5687	12.0436	11.5437	12.5004	12.5838	12.641	12.8995
1.68_318.0946m/z	318.095	1.67978	pos	Fructosyl valine	206978	HMDB0252496		Organic acids and derivatives	Carboxylic acids and derivatives	Amino acids, peptides, and analogues	M+K	C11H21NO7	-1.11919	11.6713	11.3402	1.24657	10.9317	11.9778	-1.04605	0.484293	Down	0.00175719	0.0126395	10.9191	11.2805	10.8168	10.9715	10.6708	12.4335	12.1397	12.324	11.5721	11.4196
9.07_368.2790m/z	368.279	9.0732	pos	9-deoxy-9-methylene-PGE2	3681			Lipids and lipid-like molecules	Fatty Acyls	Fatty acids and conjugates	M+NH4	C21H34O4	-1.48367	10.9027	10.1666	1.24486	10.2971	11.4749	-1.17782	0.442018	Down	0.0128199	0.0481554	10.6399	10.5327	10.6866	10.2865	9.33991	11.4486	10.5963	11.2381	12.1015	11.9903
2.94_318.0948m/z	318.095	2.94295	pos	Fructosylvaline	206980	HMDB0252498		Organic acids and derivatives	Carboxylic acids and derivatives	Amino acids, peptides, and analogues	M+K	C11H21NO7	-0.623436	11.7474	11.1527	1.24234	11.2091	12.2031	-0.993928	0.502109	Down	0.000524688	0.00583003	11.5501	11.3144	11.2527	11.1792	10.7492	12.353	12.6057	11.9528	12.0313	12.0726
12.00_494.3268m/z	494.327	12.001	neg	PE(19:0/0:0)	21189			Lipids and lipid-like molecules	Glycerophospholipids	Glycerophosphoethanolamines	M-H	C24H50NO7P	3.18653	13.0051	11.9482	1.24205	12.5199	13.464	-0.944043	0.519774	Down	7.29423e-05	0.00146214	12.7531	12.3264	12.5506	12.7992	12.1704	13.5611	13.5431	13.4199	13.3641	13.4316
9.84_470.3265m/z	470.327	9.84053	pos	(8Z,11Z,14Z,17Z)-Icosa-8,11,14,17-tetraenoylcarnitine	198125	HMDB0241588		Lipids and lipid-like molecules	Fatty Acyls	Fatty acid esters	M+Na	C27H45NO4	5.50146	11.9701	11.7767	1.24064	11.4206	12.4903	-1.06968	0.476426	Down	0.00374071	0.0209869	11.1568	12.0559	11.5335	11.3951	10.9618	12.5639	11.8175	12.4509	12.9546	12.6645
7.23_316.2481m/z	316.248	7.22512	pos	O-decanoyl-R-carnitine	8288	HMDB0000651	C03299	Lipids and lipid-like molecules	Fatty Acyls	Fatty acid esters	M+H	C17H33NO4	-0.516111	11.1229	10.8004	1.24036	10.915	12.014	-1.09901	0.466836	Down	0.00580294	0.0280241	10.9743	11.5616	10.561	11.2626	10.2154	11.5281	12.0435	11.7411	12.3369	12.4203
15.06_176.0930m/z	176.093	15.0563	pos	5,6-Dimethyl-2,3-pyrazinedicarbonitrile	201974	HMDB0246643		Organoheterocyclic compounds	Diazines	Pyrazines	M+NH4	C8H6N4	-0.497983	14.0242	11.89	1.24	14.683	13.3355	1.34752	2.54474	Up	0.0392608	0.10916	14.0687	15.4127	13.0129	15.1745	15.7461	13.1358	12.8385	13.2136	13.3647	14.1247
12.17_413.1932m/z	413.193	12.1693	neg	4'-(Nitrosomethylamino)-1-(3-pyridyl)-1-butanone	201954	HMDB0246622		Organic oxygen compounds	Organooxygen compounds	Carbonyl compounds	2M-H	C10H13N3O2	-2.61562	12.9086	13.0505	1.23759	12.4552	13.4543	-0.999122	0.500305	Down	0.00106435	0.00920974	12.832	12.813	12.0501	11.9681	12.6127	13.6383	13.3807	13.4646	13.5649	13.223
0.77_268.0806n	307.044	0.774633	pos	Ara-HX	202551	HMDB0247301		Nucleosides, nucleotides, and analogues	Purine nucleosides	Unclassified	M+H, M+Na, M+K	C10H12N4O5	-0.670149	18.3275	18.0381	1.23588	17.9696	16.9694	1.00021	2.00029	Up	0.00111783	0.00945027	18.1845	18.2776	18.3783	17.5734	17.4343	17.0095	16.8044	16.9456	16.9348	17.1529
3.97_277.1232m/z	277.123	3.97358	neg	Pantetheine	48100	HMDB0003426	C00831	Organic acids and derivatives	Carboxylic acids and derivatives	Amino acids, peptides, and analogues	M-H	C11H22N2O4S	1.4634	11.6461	11.9738	1.23584	11.1285	10.1002	1.02827	2.03957	Up	0.00219343	0.0144861	11.0032	10.9768	11.9593	10.6851	11.018	10.2831	10.1278	9.97188	10.2653	9.85289
11.12_593.1954m/z	593.195	11.1175	neg	(S)-Annocherine A	62086	HMDB0038723		Organoheterocyclic compounds	Isoquinolines and derivatives	Benzylisoquinolines	2M-H	C17H15NO4	4.16555	12.2262	11.4647	1.23493	12.4468	13.4621	-1.01522	0.494752	Down	0.00143116	0.0110853	12.3711	12.5967	12.0711	12.8826	12.3127	13.6618	13.756	13.7637	13.0661	13.0628
9.27_295.1917m/z	295.192	9.26867	neg	Norambreinolide	59176	HMDB0035293		Organoheterocyclic compounds	Naphthofurans	Unclassified	M+FA-H	C16H26O2	0.87515	11.7562	11.0465	1.23481	12.043	13.2562	-1.21328	0.431287	Down	0.0197765	0.0660926	12.6608	12.3839	11.943	10.5558	12.6713	13.3928	13.664	12.8869	13.311	13.0265
13.01_329.2491m/z	329.249	13.0143	neg	4,8,12,15,19-Docosapentaenoic acid	62434	HMDB0039133		Lipids and lipid-like molecules	Fatty Acyls	Fatty acids and conjugates	M-H	C22H34O2	1.62503	16.9688	16.7529	1.23129	16.2413	17.1425	-0.901224	0.535432	Down	1.21325e-05	0.000520395	16.4496	16.3499	16.2273	15.9301	16.2498	17.1994	17.1863	17.1104	17.2031	17.0136
10.27_345.1688m/z	345.169	10.2655	neg	(2R,5R)-2-[6-(Cyclopentylamino)-8-(methylamino)purin-9-yl]-5-(hydroxymethyl)oxolane-3,4-diol	209320	HMDB0255318		Nucleosides, nucleotides, and analogues	Purine nucleosides	Unclassified	M-H2O-H	C16H24N6O4	1.97082	9.50163	7.04205	1.23104	10.4843	11.5493	-1.06499	0.477976	Down	0.0049004	0.0249333	11.1395	10.5598	9.99059	10.2962	10.4354	10.8848	12.1572	11.5339	11.6209	11.5496
12.39_258.1982n	259.205	12.3946	pos	1,6Z,9Z,12Z,15Z-octadecapenten-3-one	10158			Organic oxygen compounds	Organooxygen compounds	Carbonyl compounds	M+H-H2O, M+H	C18H26O	-0.804005	15.7038	15.931	1.23071	17.0916	16.0024	1.08917	2.12752	Up	0.0067473	0.0309013	16.9814	16.681	17.7329	17.6802	16.3826	15.6659	16.423	15.7534	16.0795	16.0903
13.66_367.2841m/z	367.284	13.6638	pos	3-dehydrosphinganine (C20)	256947	HMDB0304123		Organic oxygen compounds	Organooxygen compounds	Carbonyl compounds	M+K	C20H42NO2+	-1.73166	11.0391	10.3274	1.23004	10.376	11.3474	-0.971388	0.510015	Down	0.000731337	0.00718548	10.6771	10.7308	9.79723	10.4312	10.2438	11.338	11.1769	11.2865	11.607	11.3288
5.00_199.0973m/z	199.097	5.00433	neg	Cladosporacid E	2017			Lipids and lipid-like molecules	Fatty Acyls	Fatty acids and conjugates	M-H	C10H16O4	-1.332	10.1531	10.3186	1.22966	11.1934	10.0914	1.10202	2.14654	Up	0.00803646	0.0351507	11.1474	10.7501	11.5601	12.1469	10.3625	10.182	10.1443	9.90693	10.1062	10.1174
7.52_229.1446m/z	229.145	7.52353	neg	Dodecanedioic acid	2824	HMDB0000623	C02678	Lipids and lipid-like molecules	Fatty Acyls	Fatty acids and conjugates	M-H	C12H22O4	0.0824065	11.3858	12.8214	1.22863	12.1705	11.1539	1.01658	2.02312	Up	0.00160599	0.0119744	12.2567	12.5217	11.4416	12.0253	12.6071	11.0145	11.0076	11.3144	11.225	11.2081
12.66_734.4867n	752.52	12.6583	pos	PA(22:6/17:0)	25722			Lipids and lipid-like molecules	Glycerophospholipids	Glycerophosphates	M+H, M+NH4	C42H71O8P	-2.70402	15.7948	14.8888	1.22862	14.8468	13.6687	1.17811	2.26279	Up	0.0158611	0.0565415	15.3926	15.3889	14.1172	14.7032	14.632	13.1339	13.5733	13.3942	13.408	14.8341
11.01_598.2767m/z	598.277	11.0138	neg	Vignatic acid A	57814	HMDB0033599		Organic acids and derivatives	Carboxylic acids and derivatives	Amino acids, peptides, and analogues	M+FA-H	C30H39N3O7	-0.609251	13.7553	13.7801	1.22785	13.2358	14.181	-0.945224	0.519349	Down	0.000261672	0.0036118	13.4187	13.2528	13.1739	12.8368	13.4969	14.3708	14.2871	14.3601	14.0112	13.8762
1.31_231.0723m/z	231.072	1.31263	pos	4-hydroxylamino-2,6-dinitrotoluene	257004	HMDB0304181	C16392	Benzenoids	Benzene and substituted derivatives	Toluenes	M+NH4	C7H7N3O5	-0.390021	8.79354	7.04205	1.22705	10.4789	11.5493	-1.07041	0.476185	Down	0.00579894	0.0280241	9.95649	10.4486	9.85441	11.0255	11.1097	11.4305	11.585	11.4788	11.9837	11.2687
0.75_457.0632m/z	457.063	0.748717	neg	5-Phosphoribosylamine	47410	HMDB0001128	C03090	Organic oxygen compounds	Organooxygen compounds	Carbohydrates and carbohydrate conjugates	2M-H	C5H12NO7P	0.478864	11.0202	7.04205	1.22562	12.842	13.9719	-1.12988	0.456954	Down	0.0112976	0.0444	12.4153	13.1329	11.7966	13.4932	13.3722	13.9428	13.7963	14.1349	13.633	14.3526
4.41_203.0923m/z	203.092	4.40748	neg	2-hydroxy-7-methyl-Octanedioic acid	2937			Organic acids and derivatives	Hydroxy acids and derivatives	Medium-chain hydroxy acids and derivatives	M-H	C9H16O5	-1.1013	7.04205	9.19304	1.22297	9.75589	8.53245	1.22344	2.33502	Up	0.0235487	0.0745755	10.0487	10.1625	9.64711	9.80423	9.11685	7.04205	9.4291	8.59273	8.78992	8.80848
8.64_344.2793m/z	344.279	8.64087	pos	5-Methylundecanoylcarnitine	197364	HMDB0240808		Lipids and lipid-like molecules	Fatty Acyls	Fatty acid esters	M+H	C19H37NO4	-0.706975	13.9997	13.6435	1.22217	13.4554	14.5085	-1.05305	0.48195	Down	0.00471528	0.0243824	13.4788	13.9488	13.5887	13.6378	12.6231	14.4432	14.0037	14.4399	14.9338	14.7217
9.58_445.2971m/z	445.297	9.58082	neg	Taccagenin	58262	HMDB0034189		Lipids and lipid-like molecules	Steroids and steroid derivatives	Furospirostanes and derivatives	M-H	C27H42O5	2.59393	11.342	11.4919	1.2207	11.7165	10.484	1.23257	2.34986	Up	0.0275424	0.0840507	12.6898	11.8554	12.2887	10.3216	11.4272	10.0914	10.5615	10.1042	10.4231	11.2395
14.08_447.3076m/z	447.308	14.0833	pos	isopropyl unoprostone	207984	HMDB0253677		Lipids and lipid-like molecules	Fatty Acyls	Eicosanoids	M+Na	C25H44O5	-1.25376	11.4258	10.4033	1.22065	12.2755	11.1405	1.13499	2.19617	Up	0.0135833	0.0502167	12.1264	11.8062	13.0908	13.0721	11.282	11.0366	11.311	11.1049	11.2363	11.0137
10.93_814.5638m/z	814.564	10.932	neg	PC(16:0/PGF1alpha)	239092	HMDB0285991		Lipids and lipid-like molecules	Fatty Acyls	Eicosanoids	M-H2O-H	C44H84NO11P	4.17893	15.4575	15.3754	1.21761	15.4228	16.3717	-0.948893	0.51803	Down	0.000598994	0.00642308	15.1666	15.7029	15.0775	15.7168	15.45	16.4364	16.3851	16.5784	16.5164	15.9419
8.34_288.2894m/z	288.289	8.34172	pos	tridecyl butyrate	7164			Lipids and lipid-like molecules	Fatty Acyls	Fatty alcohol esters	M+NH4	C17H34O2	-1.06883	11.7091	12.6682	1.21303	13.1625	12.1008	1.06177	2.08749	Up	0.00572632	0.0277549	13.9874	12.8926	13.3321	12.5536	13.0469	11.5529	12.2587	12.4465	12.0889	12.1569
4.62_219.0275m/z	219.028	4.61595	neg	4-(Trifluoromethyl)benzaldehyde	201661	HMDB0246314		Benzenoids	Benzene and substituted derivatives	Trifluoromethylbenzenes	M+FA-H	C8H5F3O	0.330109	8.26529	7.04205	1.21077	8.84677	7.67707	1.16969	2.24964	Up	0.019783	0.0660926	8.68899	8.79317	8.96558	9.14169	8.64441	7.04205	8.79002	7.04205	8.46921	7.04205
12.59_304.2403n	303.233	12.5905	neg	8,11-Eicosadiynoic acid	1116			Lipids and lipid-like molecules	Fatty Acyls	Fatty acids and conjugates	M-H, M+FA-H, 2M-H	C20H32O2	0.152061	20.9366	20.9624	1.20975	19.6436	20.6487	-1.00513	0.498226	Down	0.00325992	0.0189284	20.2232	19.7299	19.7458	18.8707	19.6484	20.6125	20.4577	20.4623	21.0432	20.6679
12.62_173.1325m/z	173.132	12.621	pos	2,2,6,7-Tetramethylbicyclo[4.3.0]nona-1(9),4-dien-8-one	60363	HMDB0036685		Organic oxygen compounds	Organooxygen compounds	Carbonyl compounds	M+H-H2O	C13H18O	-0.108178	12.1837	12.2716	1.20894	11.6037	12.5797	-0.976037	0.508374	Down	0.00182718	0.0128458	12.1407	11.5306	11.2015	11.2166	11.9288	12.9037	12.5489	12.646	12.5149	12.2849
0.71_237.1807m/z	237.181	0.714833	pos	Lucerastat	208369	HMDB0254192		Organoheterocyclic compounds	Piperidines	Unclassified	M+NH4	C10H21NO4	-1.04251	10.0071	10.6438	1.20878	9.74505	10.9779	-1.23288	0.425466	Down	0.0312412	0.0921679	8.68219	10.3565	10.3117	8.98219	10.3927	10.1361	11.8484	11.2148	11.0535	10.6369
7.42_434.1414m/z	434.141	7.41968	neg	3-Amino-6-{4-[(4-Methylpiperazin-1-Yl)sulfonyl]phenyl}-N-Pyridin-3-Ylpyrazine-2-Carboxamide	203823	HMDB0248784		Benzenoids	Benzene and substituted derivatives	Benzenesulfonamides	M-H2O-H	C21H23N7O3S	1.95866	10.2795	10.8326	1.20869	10.0735	11.1673	-1.09372	0.468551	Down	0.0100417	0.0408739	10.4328	10.3953	10.5034	9.22184	9.81435	11.5056	11.4653	11.4461	11.0402	10.379
1.49_484.0504m/z	484.05	1.49362	neg	N-Desmethyl-o-O-sulfate rosiglitazone	82695	HMDB0060837		Organic acids and derivatives	Organic sulfuric acids and derivatives	Arylsulfates	M+FA-H	C17H17N3O7S2	3.19825	11.9073	11.7483	1.20698	12.1462	11.0793	1.06688	2.0949	Up	0.00744878	0.0333856	11.592	12.301	11.3795	12.6339	12.8245	10.9334	10.9642	10.8912	11.2231	11.3846
10.57_510.2380m/z	510.238	10.5678	neg	[5-[2,4-Bis((3S)-3-methylmorpholin-4-yl)pyrido[2,3-d]pyrimidin-7-yl]-2-methoxyphenyl]methanol	203827	HMDB0248789		Organoheterocyclic compounds	Pyridines and derivatives	Phenylpyridines	M+FA-H	C25H31N5O4	4.63514	12.699	11.6624	1.20635	11.7627	12.8205	-1.05779	0.480366	Down	0.00798976	0.0349848	12.1052	12.2442	10.6475	11.8021	12.0143	12.6159	12.9372	12.5879	12.9661	12.9952
8.49_580.3278m/z	580.328	8.48555	neg	PC(16:1/2:0)	18298			Lipids and lipid-like molecules	Glycerophospholipids	Glycerophosphocholines	M+FA-H	C26H50NO8P	4.0578	11.662	12.4553	1.20211	14.2069	13.2929	0.913925	1.88416	Up	0.000372917	0.00466834	14.4562	14.4914	13.846	14.0431	14.1976	13.6605	13.3038	13.1854	13.1403	13.1746
9.71_488.3004m/z	488.3	9.71457	pos	Desisobutyrylciclesonide	205715	HMDB0251048		Lipids and lipid-like molecules	Steroids and steroid derivatives	Hydroxysteroids	M+NH4	C28H38O6	-0.548165	11.9338	12.3245	1.19958	12.6362	11.7811	0.855093	1.80888	Up	1.65438e-05	0.000623995	12.6958	12.7723	12.5474	12.5706	12.5947	12.009	11.8069	11.5659	11.6215	11.9021
9.87_349.2370m/z	349.237	9.87355	neg	MG(0:0/18:2+=O/0:0)	213647	HMDB0260540		Lipids and lipid-like molecules	Fatty Acyls	Lineolic acids and derivatives	M-H2O-H	C21H36O5	-3.96465	9.82201	10.7442	1.19932	10.1253	11.0365	-0.91122	0.531735	Down	0.000526967	0.00583909	10.1422	10.3247	9.82109	10.2135	10.1249	10.6041	10.845	11.1071	11.3927	11.2338
0.65_295.1055n	318.095	0.64835	pos	Prunasin	58862	HMDB0034934	C00844	Organic oxygen compounds	Organooxygen compounds	Carbohydrates and carbohydrate conjugates	M+Na, M+K	C14H17NO6	-0.29665	15.3697	14.1485	1.19847	14.5612	15.4946	-0.933394	0.523625	Down	0.000720355	0.00714624	14.7802	14.5599	14.5945	14.5376	14.3339	15.9358	15.7453	15.2972	15.4688	15.0259
8.36_533.3137m/z	533.314	8.3605	neg	Antcin K	204761	HMDB0249891		Lipids and lipid-like molecules	Steroids and steroid derivatives	Bile acids, alcohols and derivatives	M+FA-H	C29H44O6	3.57731	13.2327	13.5737	1.19763	13.0952	13.9772	-0.882026	0.542605	Down	0.000140576	0.00235051	13.1418	13.1715	12.9562	12.7947	13.4116	13.7176	14.1252	13.9591	14.1485	13.9355
9.21_291.1951m/z	291.195	9.21308	pos	Corchorifatty acid D	57494	HMDB0033243		Lipids and lipid-like molecules	Fatty Acyls	Lineolic acids and derivatives	M+H-H2O	C18H28O4	-1.34148	10.3063	9.66287	1.19631	11.2525	10.1702	1.0823	2.11741	Up	0.0130749	0.0488353	11.0115	10.9342	11.7379	12.144	10.4347	9.93646	10.6489	9.80418	10.091	10.3703
5.72_472.2388m/z	472.239	5.71635	neg	15-HETE-T	8726			Lipids and lipid-like molecules	Fatty Acyls	Fatty amides	M+FA-H	C22H37NO5S	3.22171	12.6185	11.6643	1.19566	12.0719	13.0105	-0.938624	0.52173	Down	0.00101696	0.0088962	12.2596	12.179	11.9145	12.024	11.9824	12.8928	13.5556	12.4797	13.155	12.9696
0.70_257.1027n	258.11	0.69945	pos	sn-Glycero-3-phosphocholine	46863	HMDB0000086	C00670	Lipids and lipid-like molecules	Glycerophospholipids	Glycerophosphocholines	M+H, M+Na	C8H20NO6P	-0.384116	20.3446	20.8851	1.195	19.356	18.234	1.12202	2.17652	Up	0.0191304	0.0646156	19.8967	19.5907	19.8651	18.5536	18.8739	19.0866	18.4209	17.5267	18.3341	17.8016
12.73_429.1956m/z	429.196	12.7274	neg	Ptilosteroid C	45080			Lipids and lipid-like molecules	Steroids and steroid derivatives	Sulfated steroids	M-H	C21H34O7S	0.747562	13.8866	13.6655	1.19493	12.9448	14.015	-1.07014	0.476272	Down	0.0123153	0.047088	13.3332	13.1156	12.6414	12.1528	13.4811	14.1762	13.4234	14.6828	14.1943	13.5982
9.08_313.2390m/z	313.239	9.08213	neg	9,13-DiHOME(10)	3116			Lipids and lipid-like molecules	Fatty Acyls	Fatty acids and conjugates	M-H	C18H34O4	1.9047	11.0146	11.415	1.19351	12.4857	11.6029	0.882837	1.844	Up	0.000147647	0.0024411	12.5254	12.3756	12.4559	12.8748	12.1967	11.359	11.774	11.6719	11.6251	11.5844
5.47_145.0863m/z	145.086	5.47308	neg	1-methyl-cyclopentanol	6281			Organic oxygen compounds	Organooxygen compounds	Alcohols and polyols	M+FA-H	C6H12O	-6.89472	10.4538	11.2348	1.19281	11.7344	10.7214	1.01305	2.01817	Up	0.00588077	0.0283656	11.5757	11.1521	12.3757	12.3328	11.2358	10.6264	10.8304	10.8804	10.4922	10.7774
3.83_403.0989m/z	403.099	3.82862	neg	Glyceryl lactopalmitate	56682	HMDB0032299		Organoheterocyclic compounds	Azoles	Pyrazoles	M-H	C20H16N6O2S	1.53731	9.97982	10.0274	1.19222	11.6542	10.531	1.12312	2.17818	Up	0.0162892	0.0574851	11.4044	12.148	11.8131	11.6067	11.2987	9.9544	9.50416	11.233	10.9742	10.9895
12.62_189.1636m/z	189.164	12.621	pos	Etaspirene	59828	HMDB0036023		Organoheterocyclic compounds	Dihydrofurans	Unclassified	M+H-H2O	C14H22O	-0.812799	13.3172	13.5348	1.19154	12.7513	13.6976	-0.946213	0.518993	Down	0.00167688	0.0122511	13.1846	12.887	12.4072	12.2889	12.9891	14.0686	13.6834	13.6829	13.6712	13.3817
15.22_580.4966m/z	580.497	15.2164	neg	Cer(d16:2/18:0)	39082			Lipids and lipid-like molecules	Sphingolipids	Ceramides	M+FA-H	C34H65NO3	3.70132	13.9642	12.8988	1.19127	12.8338	13.7984	-0.964588	0.512425	Down	0.00300899	0.0180223	13.054	12.9205	12.7841	12.3511	13.0593	13.2605	13.4371	13.9701	14.1741	14.1501
1.30_471.0371m/z	471.037	1.30498	neg	Sulfacetamide	52954	HMDB0014772	C08051	Benzenoids	Benzene and substituted derivatives	Benzenesulfonamides	2M-H	C8H9N2NaO3S	-4.09416	14.4762	14.5943	1.19039	14.1788	13.3131	0.86571	1.82224	Up	8.14589e-05	0.00158507	14.2666	14.143	14.4131	14.1514	13.9199	13.5683	13.0592	13.3795	13.3533	13.2051
3.73_624.2648m/z	624.265	3.72538	neg	Beta-Casomorphin-5	204117	HMDB0249107		Organic acids and derivatives	Carboxylic acids and derivatives	Amino acids, peptides, and analogues	M+FA-H	C30H37N5O7	-4.58191	10.8211	12.3708	1.1891	12.5295	11.5564	0.973059	1.963	Up	0.00266321	0.0164738	12.2659	12.8343	12.6637	12.6792	12.2042	11.3619	11.3262	12.2149	11.7312	11.1478
10.09_444.3670m/z	444.367	10.0894	pos	8-Hydroxyoctadecanoylcarnitine	198066	HMDB0241524		Lipids and lipid-like molecules	Fatty Acyls	Fatty acid esters	M+H	C25H49NO5	-3.00548	14.4381	14.2496	1.18856	14.037	14.8607	-0.823731	0.564979	Down	1.18979e-06	0.000115757	14.1126	14.0952	14.0567	13.9671	13.9535	14.7677	14.7262	14.862	14.9145	15.0333
5.31_297.0960m/z	297.096	5.30692	neg	4-Ethylphenol glucuronide	197270	HMDB0240654		Organic oxygen compounds	Organooxygen compounds	Carbohydrates and carbohydrate conjugates	M-H	C14H18O7	-6.48647	9.85417	9.32134	1.18737	11.3969	10.3834	1.01352	2.01883	Up	0.00670106	0.0307955	11.2639	10.7544	11.791	12.2062	10.969	10.574	10.5577	10.2466	10.3813	10.1572
11.81_552.4022m/z	552.402	11.811	pos	PC(O-16:0/4:0)	19546			Lipids and lipid-like molecules	Glycerophospholipids	Glycerophosphocholines	M+H	C28H58NO7P	-0.214667	17.2108	17.25	1.18657	16.6698	17.5599	-0.890136	0.539563	Down	0.00033435	0.00433026	16.878	16.6848	16.6095	16.8861	16.2905	17.809	17.6459	17.6215	17.5272	17.196
10.27_599.3221m/z	599.322	10.2655	neg	5-Oxoavermectin ''2a'' aglycone	274020		C11970	Phenylpropanoids and polyketides	Macrolides and analogues	Milbemycins	M-H	C34H48O9	-0.833989	17.6252	16.27	1.18618	16.5773	17.5823	-1.00503	0.498259	Down	0.0062987	0.0295594	17.1394	16.7016	16.6684	16.2459	16.1311	16.7641	17.7195	17.7783	17.7701	17.8795
4.87_357.2354m/z	357.235	4.87445	pos	Bursin	204395	HMDB0249447		Organic acids and derivatives	Carboxylic acids and derivatives	Amino acids, peptides, and analogues	M+NH4	C14H25N7O3	-0.925252	10.6814	10.6047	1.1842	10.6757	11.6118	-0.93606	0.522658	Down	0.00145253	0.0111641	10.7465	10.5393	10.8621	10.8765	10.3543	11.3807	11.7881	11.9876	11.0648	11.8379
13.37_331.2648m/z	331.265	13.3687	neg	Adrenic Acid	679	HMDB0002226	C16527	Lipids and lipid-like molecules	Fatty Acyls	Fatty acids and conjugates	M-H	C22H36O2	1.60713	17.9818	18.5895	1.18197	17.47	18.4024	-0.932417	0.52398	Down	0.00182877	0.0128458	17.9701	17.1341	17.7333	16.9178	17.5946	18.2228	18.3952	18.3735	18.6194	18.4011
4.00_589.2338m/z	589.234	4.0031	neg	Indobufen	207801	HMDB0253465		Organoheterocyclic compounds	Isoindoles and derivatives	Isoindolines	2M-H	C18H17NO3	-1.08686	8.8205	10.7701	1.18114	10.8984	9.80739	1.09102	2.13024	Up	0.0154902	0.0557174	10.475	11.1564	10.3183	10.7507	11.7917	9.01704	10.2846	9.50507	10.1338	10.0964
8.36_321.1477m/z	321.148	8.3605	neg	10-(Phosphonooxy)decyl methacrylate	202744	HMDB0247525		Organic acids and derivatives	Organic phosphoric acids and derivatives	Phosphate esters	M-H	C14H27O6P	1.55068	10.4719	10.5046	1.18108	10.8968	9.87723	1.01961	2.02737	Up	0.00841569	0.0363033	11.2032	10.6644	10.9452	11.6002	10.0712	10.0481	10.3242	9.83836	9.59075	9.58473
0.67_296.0659m/z	296.066	0.668633	pos	Pyro-L-glutaminyl-L-glutamine	62517	HMDB0039229		Organic acids and derivatives	Carboxylic acids and derivatives	Amino acids, peptides, and analogues	M+K	C10H15N3O5	6.00025	18.0347	18.5264	1.17883	17.3746	16.1792	1.19546	2.29017	Up	0.0386607	0.108147	18.3263	17.3935	17.8672	16.519	16.7671	17.3495	16.3452	15.5875	16.2581	15.3556
12.62_201.1636m/z	201.164	12.621	pos	selina-4(14),7,11-trien-9-ol	35605			Lipids and lipid-like molecules	Prenol lipids	Sesquiterpenoids	M+H-H2O	C15H22O	-0.672501	12.9906	13.2105	1.17821	12.4951	13.3951	-0.900039	0.535872	Down	0.000866427	0.00794523	12.9078	12.6492	12.1577	12.112	12.6487	13.6815	13.261	13.4571	13.3325	13.2435
10.57_656.2431m/z	656.243	10.5678	neg	Lewis b	208272	HMDB0254067		Organic oxygen compounds	Organooxygen compounds	Carbohydrates and carbohydrate conjugates	M-H2O-H	C26H45NO19	3.46509	14.5223	13.9285	1.1781	14.0296	14.9314	-0.901774	0.535228	Down	0.000843455	0.00780637	14.4484	13.9195	13.6878	13.787	14.3053	15.0904	14.8711	14.7629	14.7346	15.1979
12.51_321.2051m/z	321.205	12.5074	neg	10,14-octadecadiynoic acid	1029			Lipids and lipid-like molecules	Fatty Acyls	Fatty acids and conjugates	M+FA-H	C18H28O2	-7.29262	14.0852	15.1287	1.17797	14.556	13.6561	0.899884	1.86592	Up	0.000674234	0.00684356	14.5454	14.7537	14.3867	14.1057	14.9886	13.5504	13.4479	13.6714	13.7523	13.8587
5.05_231.1239m/z	231.124	5.05387	neg	(1beta,2beta,5beta)-p-Menth-3-ene-1,2,5-triol	62295	HMDB0038978		Lipids and lipid-like molecules	Prenol lipids	Monoterpenoids	M+FA-H	C10H18O3	0.437299	7.04205	8.54558	1.17582	9.6245	8.42632	1.19817	2.29449	Up	0.0410475	0.112458	10.5244	10.4143	9.23692	8.87367	9.07327	8.71672	8.79871	8.75513	7.04205	8.81901
5.55_171.1022m/z	171.102	5.55125	neg	6-propionyl n-caproic acid	2062			Lipids and lipid-like molecules	Fatty Acyls	Fatty acids and conjugates	M-H	C9H16O3	-2.73736	11.0826	10.9126	1.17556	11.9625	10.9495	1.01298	2.01808	Up	0.00898924	0.0378649	11.6722	11.4888	12.6576	12.5958	11.398	10.7444	11.277	10.6882	10.9546	11.0834
4.97_436.2109m/z	436.211	4.96593	pos	Scandinone	29475			Phenylpropanoids and polyketides	Isoflavonoids	Isoflavans	M+NH4	C26H26O5	-2.33236	13.4444	13.6159	1.1755	14.6162	13.6337	0.982514	1.97591	Up	0.00527152	0.0261543	14.9695	14.9144	13.8862	14.5598	14.7509	14.2243	13.728	13.6023	13.3065	13.3072
0.74_221.0900n	244.079	0.741617	pos	(2R,5S)-5-Amino-1,2,6,7-tetrahydroxyoctane-3,4-dione	209321	HMDB0255319		Organic oxygen compounds	Organooxygen compounds	Carbohydrates and carbohydrate conjugates	M+Na, M+K, M+H	C8H15NO6	0.143632	13.8933	13.4936	1.17472	13.7681	14.6809	-0.912825	0.531144	Down	0.00112728	0.00950678	13.8036	13.9513	14.21	13.5496	13.3261	14.4196	14.8702	14.5589	14.5906	14.9654
11.33_527.2230m/z	527.223	11.3298	neg	Cinnamyl cinnamate	58002	HMDB0033832		Phenylpropanoids and polyketides	Cinnamic acids and derivatives	Cinnamic acid esters	2M-H	C18H16O2	0.464424	7.04205	8.98611	1.17465	9.63343	10.5969	-0.963466	0.512823	Down	0.00334537	0.0193478	9.88516	9.05119	9.9879	9.92892	9.31397	10.7027	10.9569	10.6459	10.115	10.564
1.43_319.0666m/z	319.067	1.42922	neg	3-oxo-adipic acid	2907	HMDB0000398	C00846	Organic acids and derivatives	Keto acids and derivatives	Medium-chain keto acids and derivatives	2M-H	C6H8O5	-1.31621	7.04205	7.04205	1.17159	9.07517	10.3196	-1.24447	0.422064	Down	0.0496959	0.129906	8.75042	8.54234	9.88072	9.21517	8.98717	8.87957	11.851	9.8292	10.5042	10.5342
0.97_318.0946m/z	318.095	0.9749	pos	N-(1-Deoxy-1-fructosyl)valine	61329	HMDB0037844		Organic acids and derivatives	Carboxylic acids and derivatives	Amino acids, peptides, and analogues	M+K	C11H21NO7	-1.386	11.5236	10.7402	1.17017	10.67	11.5686	-0.898612	0.536403	Down	0.0010394	0.0090528	10.9371	11.0485	10.638	10.5441	10.1823	11.7679	11.6628	11.6671	11.5123	11.2331
8.38_602.3120m/z	602.312	8.38233	neg	OOV-PS	27956			Lipids and lipid-like molecules	Glycerophospholipids	Glycerophosphoserines	M-H2O-H	C29H52NO11P	3.29922	7.04205	10.9974	1.16923	12.7834	11.8887	0.894719	1.85925	Up	0.00100516	0.00883037	12.9632	13.2592	12.6324	12.3275	12.7346	12.1927	11.7254	11.9326	11.8208	11.772
1.30_325.0326m/z	325.033	1.30498	neg	1-Methoxyspirobrassinin	58348	HMDB0034303		Organoheterocyclic compounds	Indoles and derivatives	Unclassified	M+FA-H	C12H12N2O2S2	1.22239	13.8956	14.0591	1.16688	13.706	12.8803	0.825625	1.7723	Up	5.56093e-05	0.00124969	13.8863	13.65	13.8897	13.5498	13.5539	13.0816	12.8311	12.6615	13.0083	12.8192
3.45_201.0082m/z	201.008	3.45438	pos	1,4-Butanediphosphonic acid	199728	HMDB0244204		Organic acids and derivatives	Organic phosphonic acids and derivatives	Organic phosphonic acids	M+H-H2O	C4H12O6P2	2.61409	10.6433	10.4581	1.16616	10.4855	11.3545	-0.868968	0.547538	Down	0.000409525	0.00495028	10.7137	10.5709	10.4699	10.2202	10.4528	11.5528	11.4938	11.4705	10.8591	11.3961
10.44_584.2988m/z	584.299	10.4394	pos	Euphornin	280390		C19991	Lipids and lipid-like molecules	Prenol lipids	Diterpenoids	M+	C33H44O9	0.440225	11.0806	10.0161	1.16573	10.332	11.2689	-0.936853	0.522371	Down	0.00305386	0.0181819	10.7214	10.0051	10.7593	9.70252	10.4718	11.4471	11.1681	10.9888	11.4148	11.3257
0.72_304.1154m/z	304.115	0.7156	neg	Ser-Pro-Gly	265081			Organic acids and derivatives	Carboxylic acids and derivatives	Amino acids, peptides, and analogues	M+FA-H	C10H17N3O5	1.41314	12.5665	13.1078	1.16572	12.8538	11.8461	1.00778	2.01082	Up	0.0108264	0.0431002	12.4702	13.3131	12.9434	12.6292	12.9133	11.5372	12.2652	11.5585	11.2021	12.6673
11.77_532.3039m/z	532.304	11.7707	neg	2-(8-[3]-ladderane-octanyl)-sn-glycero-3-phosphoethanolamine	21236			Lipids and lipid-like molecules	Glycerophospholipids	Glycerophosphoethanolamines	M+FA-H	C25H46NO6P	-1.19962	14.5035	13.8426	1.16564	14.2277	15.0916	-0.863933	0.549453	Down	0.000383911	0.00475597	14.0583	14.0274	14.0623	14.7475	14.243	15.2048	15.2049	15.1366	14.9034	15.0084
14.46_254.9163m/z	254.916	14.4589	neg	4,5-Dinitro-7,8-dithiabicyclo[4.2.0]octa-1(6),2,4-triene-2-carboxylic acid	211550	HMDB0257945		Benzenoids	Benzene and substituted derivatives	Benzoic acids and derivatives	M-H2O-H	C7H2N2O6S2	-4.72069	15.0848	14.4574	1.16401	14.5521	15.3416	-0.789463	0.57856	Down	7.01798e-07	8.23374e-05	14.5857	14.5624	14.6516	14.4358	14.5251	15.1955	15.4067	15.3184	15.3314	15.456
2.32_318.0947m/z	318.095	2.32457	pos	N-[(2R,3R,4S,6R)-4,6-Dihydroxy-6-methyl-2-[(1R,2R)-1,2,3-trihydroxypropyl]oxan-3-yl]acetamide	211596	HMDB0257998		Organoheterocyclic compounds	Oxanes	Unclassified	M+K	C11H21NO7	-0.887005	11.2984	10.9659	1.16301	10.9588	11.9309	-0.972072	0.509773	Down	0.00511241	0.025591	11.4093	11.1848	11.0148	10.8115	10.3737	12.3874	12.3232	11.7284	11.429	11.7867
11.98_386.1958m/z	386.196	11.9811	neg	Propafenone	53398	HMDB0015313	C07381	Phenylpropanoids and polyketides	Linear 1,3-diarylpropanoids	Unclassified	M+FA-H	C21H27NO3	-4.43269	14.2089	13.9532	1.1616	12.8481	13.8018	-0.953731	0.516295	Down	0.00519497	0.0258388	13.2698	13.1656	12.9488	12.1466	12.7095	13.5937	13.5049	13.5724	14.2026	14.1355
13.24_550.3865m/z	550.387	13.2402	pos	PC(20:1/0:0)	19845			Lipids and lipid-like molecules	Glycerophospholipids	Glycerophosphocholines	M+H	C28H56NO7P	-0.373988	16.1154	16.6514	1.1608	16.5173	15.6351	0.88219	1.84317	Up	0.000948159	0.00849934	16.4323	16.3243	16.2387	17.1185	16.4726	15.5679	15.6438	15.4046	15.8722	15.6869
12.62_145.1011m/z	145.101	12.621	pos	4,4alpha,5,6-Tetrahydro-7-methyl-2(3H)-naphthalenone	63051	HMDB0039803		Organic oxygen compounds	Organooxygen compounds	Carbonyl compounds	M+H-H2O	C11H14O	-0.742343	12.7803	13.1044	1.15967	12.2528	13.1742	-0.921371	0.528007	Down	0.00312279	0.0184351	12.7656	12.4513	11.7907	11.7723	12.4841	13.4584	13.0941	13.2275	13.2083	12.8827
3.95_652.8054m/z	652.805	3.94888	pos	3,3,5'-Triiodothyronine	201370	HMDB0245997		Organic acids and derivatives	Carboxylic acids and derivatives	Amino acids, peptides, and analogues	M+	C15H14I3NO4	-0.500204	12.2619	11.7413	1.15916	12.8511	11.8665	0.984623	1.9788	Up	0.00660521	0.0305861	13.0272	12.9242	12.4505	12.5003	13.3533	11.1888	12.1918	12.3618	11.9848	11.6052
0.89_218.9051m/z	218.905	0.887367	neg	5-Iodouracil	202136	HMDB0246818		Organoheterocyclic compounds	Diazines	Pyrimidines and pyrimidine derivatives	M-H2O-H	C4H3IN2O2	-4.08121	12.9883	11.2377	1.15824	13.3149	12.2149	1.10007	2.14365	Up	0.0269136	0.0826862	14.0307	13.6275	13.6866	13.4654	11.7645	12.3922	12.4361	12.0481	12.1205	12.0773
10.68_858.5517m/z	858.552	10.6817	neg	PC(20:4-2OH(5S,15S)/16:0)	239069	HMDB0285968		Lipids and lipid-like molecules	Glycerophospholipids	Glycerophosphocholines	M+FA-H	C44H80NO10P	1.81218	15.6141	16.2521	1.15794	16.2631	17.117	-0.853953	0.553267	Down	0.000622926	0.00655634	16.4696	16.1843	15.8404	16.4657	16.3554	17.0126	16.8161	17.4541	17.1474	17.1549
11.91_347.1954m/z	347.195	11.9131	pos	1,1,1-Trifluoroheptadecan-2-one	209964	HMDB0256073		Organic oxygen compounds	Organooxygen compounds	Carbonyl compounds	M+K	C17H31F3O	-1.43808	12.8745	12.8504	1.15713	11.5999	12.576	-0.976052	0.508369	Down	0.0079761	0.0349634	11.9225	12.0596	11.5118	10.6764	11.8295	12.4781	12.4316	12.251	12.9646	12.7546
3.79_188.0350m/z	188.035	3.79382	neg	Kynurenic acid	47176	HMDB0000715	C01717	Organoheterocyclic compounds	Quinolines and derivatives	Quinoline carboxylic acids	M-H	C10H7NO3	-1.7039	12.4852	12.4687	1.15477	13.3372	12.4406	0.896641	1.86173	Up	0.00198884	0.0135646	13.0978	13.4366	12.9777	13.7646	13.4093	12.6466	12.3313	12.8211	11.9841	12.4199
9.00_524.2774m/z	524.277	8.9965	pos	4-Chloro-2-nitrobenzylalcohol	204475	HMDB0249542		Organoheterocyclic compounds	Benzoxazoles	Unclassified	M+H	C29H37N3O6	3.62169	10.9909	10.6771	1.15233	12.8106	11.893	0.917601	1.88897	Up	0.00353006	0.0201676	12.8057	13.2267	12.2821	13.1122	12.6265	12.2441	12.2321	11.8083	11.6416	11.539
11.67_653.3425m/z	653.342	11.6668	neg	Azaperone	203805	HMDB0248764		Organic oxygen compounds	Organooxygen compounds	Carbonyl compounds	2M-H	C19H22FN3O	0.595306	12.9484	12.3278	1.15132	12.4744	13.3475	-0.873088	0.545977	Down	0.000990535	0.00873469	12.7368	12.4096	12.5448	12.6272	12.0538	13.7866	13.4691	13.1897	13.2013	13.0907
0.70_241.0310m/z	241.031	0.69945	pos	L-Cystine	46921	HMDB0000192	C00491	Organic acids and derivatives	Carboxylic acids and derivatives	Amino acids, peptides, and analogues	M+H	C6H12N2O4S2	-0.476184	12.6146	11.5251	1.15131	14.1734	15.14	-0.966594	0.511713	Down	0.00814647	0.0354376	14.1437	14.1397	13.2857	14.4819	14.816	14.9613	15.0444	15.0575	15.0728	15.5641
11.46_409.3078m/z	409.308	11.4564	neg	N-Oleoyl Glutamine	198476	HMDB0241958		Organic acids and derivatives	Carboxylic acids and derivatives	Amino acids, peptides, and analogues	M-H	C23H42N2O4	1.50877	9.34945	9.57993	1.14918	8.88531	9.90616	-1.02085	0.492825	Down	0.0164215	0.0576633	9.19745	9.55842	8.68772	8.71131	8.27164	9.60227	9.1208	10.5693	9.97621	10.2623
5.19_303.1388m/z	303.139	5.18858	neg	Isoderricin A	34196			Phenylpropanoids and polyketides	Flavonoids	Flavans	M-H2O-H	C21H22O3	-0.795145	10.3723	11.2653	1.14729	10.8869	9.89323	0.993716	1.99131	Up	0.0134262	0.0499545	10.7815	10.9437	11.762	10.6745	10.2731	9.97672	10.6021	9.8189	9.58472	9.48375
10.87_437.2903n	438.298	10.8705	pos	PE(P-16:0/0:0)	21270	HMDB0011152		Lipids and lipid-like molecules	Glycerophospholipids	Glycerophosphoethanolamines	M+H, M+Na	C21H44NO6P	-0.745987	20.0123	19.5957	1.14619	19.5717	20.3735	-0.801753	0.573652	Down	6.26833e-05	0.00137047	19.671	19.786	19.4686	19.2799	19.653	20.4811	20.5247	20.2182	20.314	20.3294
1.30_539.0251m/z	539.025	1.30498	neg	Nasutin A	209457	HMDB0255467		Phenylpropanoids and polyketides	Coumarins and derivatives	Unclassified	2M-H	C14H6O6	-0.896291	13.4552	13.4528	1.14572	12.9743	12.1395	0.834785	1.78359	Up	0.000461424	0.00538193	13.1607	12.9893	13.1402	12.8991	12.6823	12.4698	11.77	12.2606	12.0153	12.1821
10.67_454.3883m/z	454.388	10.6657	pos	Cholestane-3b,5a,6b,(25R)26-tetrol	43782			Lipids and lipid-like molecules	Steroids and steroid derivatives	Bile acids, alcohols and derivatives	M+NH4	C27H48O4	-1.86114	13.1389	12.8591	1.14533	12.8509	13.7926	-0.941683	0.520625	Down	0.00592145	0.0284586	12.3161	12.8971	12.7818	13.7287	12.5309	13.6579	13.5708	13.8466	13.9003	13.9873
5.31_229.1082m/z	229.108	5.30692	neg	(4S,8R)-8,9-Dihydroxy-p-menth-1(6)-en-2-one	62364	HMDB0039052		Lipids and lipid-like molecules	Prenol lipids	Monoterpenoids	M+FA-H	C10H16O3	0.117085	12.2651	12.331	1.14449	13.8776	12.9274	0.950126	1.93204	Up	0.0074836	0.0334572	13.6351	13.325	14.2758	14.6756	13.4763	13.0464	13.0306	12.7432	13.0676	12.7494
12.51_407.1881m/z	407.188	12.5074	neg	6-beta-hydroxydexamethasone	82859	HMDB0061022		Lipids and lipid-like molecules	Steroids and steroid derivatives	Hydroxysteroids	M-H	C22H29FO6	1.38178	11.5281	10.4603	1.14428	10.9302	11.8471	-0.916821	0.529675	Down	0.00409527	0.0222438	11.3642	10.1437	11.1958	10.9885	10.9591	12.1467	11.8433	11.766	11.9176	11.5618
12.70_614.3404m/z	614.34	12.7	pos	PI(19:0/0:0)	24894			Lipids and lipid-like molecules	Glycerophospholipids	Glycerophosphoinositols	M+	C28H55O12P	-4.45679	15.8857	15.0152	1.14372	15.0717	15.9655	-0.893799	0.538195	Down	0.00254355	0.0160035	15.554	15.1912	14.5856	15.2716	14.7558	16.2546	16.194	15.7215	15.8365	15.8207
7.85_449.1286m/z	449.129	7.84625	neg	Theviridoside	534678			Lipids and lipid-like molecules	Prenol lipids	Terpene glycosides	M+FA-H	C17H24O11	-3.72722	7.04205	7.04205	1.14318	10.082	11.1737	-1.09173	0.469197	Down	0.0306899	0.0912915	11.5679	9.92446	9.58671	9.97164	9.35926	10.9038	11.7666	11.0188	11.0888	11.0906
12.62_159.1166m/z	159.117	12.621	pos	1-Phenyl-1-cyclohexene	199520	HMDB0243990		Benzenoids	Benzene and substituted derivatives	Unclassified	M+H	C12H14	-1.21574	12.1845	12.2705	1.14173	11.6294	12.5386	-0.90921	0.532477	Down	0.00405677	0.0221374	12.1008	11.891	11.1792	11.1695	11.8061	12.9359	12.5573	12.5373	12.5084	12.1539
11.83_418.2974m/z	418.297	11.8343	neg	N-palmitoyl tyrosine	8675	HMDB0062340		Organic acids and derivatives	Carboxylic acids and derivatives	Amino acids, peptides, and analogues	M-H	C25H41NO4	2.57794	10.1282	8.64349	1.14162	9.79595	10.8689	-1.07295	0.475347	Down	0.0305572	0.0911007	9.70159	10.5122	9.46894	9.28309	10.014	9.58465	10.8148	11.3286	11.5913	11.0252
11.98_301.2174m/z	301.217	11.9811	neg	Eicosapentaenoic Acid	1173	HMDB0001999	C06428	Lipids and lipid-like molecules	Fatty Acyls	Fatty acids and conjugates	M-H	C20H30O2	0.18312	18.8808	19.0575	1.14139	17.7353	18.6443	-0.908968	0.532566	Down	0.0042446	0.0227271	18.1134	18.0554	17.8224	17.0389	17.6465	18.4703	18.3926	18.4705	19.0164	18.8717
4.86_202.0905m/z	202.091	4.86193	neg	7-(Methylthio)heptanenitrile	56355	HMDB0031890		Organic nitrogen compounds	Organonitrogen compounds	Organic cyanides	M+FA-H	C8H15NS	-1.29802	8.79051	8.57181	1.14049	11.3677	10.4734	0.89431	1.85872	Up	0.00312239	0.0184351	11.3502	11.0002	11.5258	12.0156	10.9469	10.2593	10.5697	10.2815	10.5219	10.7349
11.06_284.2236m/z	284.224	11.0562	neg	Myristoylglycine	52231	HMDB0013250		Organic acids and derivatives	Carboxylic acids and derivatives	Amino acids, peptides, and analogues	M-H	C16H31NO3	1.54019	11.7572	11.5496	1.13986	11.4142	12.2074	-0.793261	0.577038	Down	6.07102e-05	0.00133797	11.2529	11.5138	11.6339	11.1957	11.4746	12.2331	12.3769	12.27	12.1607	11.9965
10.89_594.3411m/z	594.341	10.8912	neg	PS-PC	27841			Lipids and lipid-like molecules	Glycerophospholipids	Glycerophosphocholines	M-H	C28H54NO10P	-0.252419	13.5266	13.1065	1.13801	13.0259	13.9615	-0.935631	0.522814	Down	0.0059948	0.0286386	12.5349	12.8045	13.1409	13.8694	12.7796	14.292	13.8622	14.0817	13.8325	13.739
13.22_509.2877m/z	509.288	13.2194	pos	POV-PA	28058			Lipids and lipid-like molecules	Glycerophospholipids	Glycerophosphates	M+H	C24H45O9P	0.575562	12.8874	12.6958	1.13615	12.3378	13.2265	-0.88875	0.540082	Down	0.00314849	0.0185514	12.8071	12.7496	12.2012	11.6558	12.275	13.3762	13.1642	13.146	13.2425	13.2035
12.62_187.1480m/z	187.148	12.621	pos	7-Ethyl-3,6-dihydro-1,4-dimethylazulene	60221	HMDB0036471		Hydrocarbons	Unsaturated hydrocarbons	Branched unsaturated hydrocarbons	M+H	C14H18	-0.729778	12.2091	12.5154	1.13319	11.6798	12.5866	-0.906757	0.533383	Down	0.00489885	0.0249333	12.1686	11.8233	11.3087	11.1478	11.9507	13.0354	12.5898	12.5884	12.5224	12.1967
0.71_279.1913m/z	279.191	0.714833	pos	(2S,3R)-3-Hydroxy-2-methylbutanoylcarnitine	198180	HMDB0241646		Lipids and lipid-like molecules	Fatty Acyls	Fatty acid esters	M+NH4	C12H23NO5	-0.528727	14.1989	12.9897	1.13118	12.6189	13.5131	-0.894166	0.538058	Down	0.00361797	0.0205102	12.5346	12.6194	13.0035	12.0609	12.8761	13.7867	13.7894	13.2365	13.669	13.084
6.21_315.1336m/z	315.134	6.21097	pos	Cyclopropyl-methoxycarbonyl metomidate	212907	HMDB0259618		Organoheterocyclic compounds	Azoles	Imidazoles	M+H	C17H18N2O4	-1.06091	13.3171	12.16	1.1308	12.4471	13.3535	-0.906397	0.533516	Down	0.00496599	0.0251025	12.8637	12.9009	12.4851	11.8135	12.1725	13.5778	13.3111	13.0128	13.6294	13.2365
4.41_243.1338m/z	243.134	4.41093	pos	3'-Hydroxyamobarbital	201465	HMDB0246097		Organoheterocyclic compounds	Diazines	Pyrimidines and pyrimidine derivatives	M+H	C11H18N2O4	-0.462461	9.24291	10.6325	1.12783	10.911	9.92945	0.981508	1.97453	Up	0.0161767	0.0571559	10.3841	11.475	10.7362	11.3741	10.5854	9.63525	10.6619	10.1481	9.24191	9.96014
0.99_277.0483m/z	277.048	0.992083	neg	3-Hydroxypicolinic acid	52200	HMDB0013188	C18620	Organoheterocyclic compounds	Pyridines and derivatives	Pyridinecarboxylic acids and derivatives	2M-H	C6H5NO3	5.96032	10.4988	10.3998	1.12712	10.2955	11.1196	-0.824115	0.564829	Down	0.000615769	0.00651539	10.5662	10.2169	10.5167	10.0463	10.1312	11.2637	11.2189	10.8993	10.8233	11.3927
8.20_602.3121m/z	602.312	8.19922	neg	PC(6:2/14:2)	18554			Lipids and lipid-like molecules	Glycerophospholipids	Glycerophosphocholines	M+FA-H	C28H48NO8P	3.8768	7.04205	10.6338	1.12709	12.3834	11.3498	1.03363	2.04717	Up	0.0243796	0.0768036	12.9303	13.0166	12.5598	11.1131	12.2971	11.9204	11.1666	11.1259	11.3528	11.1831
11.27_450.3002m/z	450.3	11.2653	neg	1-(2-methoxy-14-methyl-pentadecanyl)-sn-glycero-3-phosphoethanolamine	21247			Lipids and lipid-like molecules	Glycerophospholipids	Glycerophosphoethanolamines	M-H2O-H	C22H48NO7P	2.48426	15.3653	14.8386	1.12654	15.0527	15.7965	-0.743814	0.597158	Down	1.46871e-06	0.000128973	15.1421	15.1304	15.0173	14.9059	15.0678	15.9129	15.8718	15.754	15.7084	15.7355
11.10_532.3418m/z	532.342	11.0969	neg	PC(17:0/2:0)	18310			Lipids and lipid-like molecules	Glycerophospholipids	Glycerophosphocholines	M-H2O-H	C27H54NO8P	1.74397	11.4199	11.2289	1.12605	10.8095	11.6561	-0.846615	0.556088	Down	0.00146194	0.0111932	11.0674	10.8872	11.1663	10.2621	10.6645	11.821	11.6039	11.778	11.3891	11.6885
10.87_455.2427m/z	455.243	10.8705	neg	PG(14:0/0:0)	23674			Lipids and lipid-like molecules	Glycerophospholipids	Glycerophosphoglycerols	M-H	C20H41O9P	2.5545	13.6339	12.5275	1.12538	13.7058	12.7829	0.922895	1.89592	Up	0.00661525	0.0305861	13.5281	13.7181	13.8757	14.072	13.335	12.3902	12.1297	13.1752	13.0505	13.1688
0.70_219.0265m/z	219.026	0.69945	pos	Scyllo-Inositol	48669	HMDB0006088	C06153	Organic oxygen compounds	Organooxygen compounds	Alcohols and polyols	M+K	C6H12O6	-0.420313	12.7051	11.9578	1.1253	12.3564	13.2769	-0.92053	0.528315	Down	0.00774265	0.0342847	12.7883	12.0572	12.7404	11.927	12.269	12.6707	13.5729	13.0218	13.7403	13.3787
1.38_478.1077m/z	478.108	1.3811	pos	Tecarfarin	212223	HMDB0258769		Phenylpropanoids and polyketides	Coumarins and derivatives	Hydroxycoumarins	M+NH4	C21H14F6O5	-1.36089	13.0709	13.2451	1.12418	13.7894	14.5585	-0.76912	0.586775	Down	6.01994e-05	0.00133409	13.4923	13.7218	13.7718	13.9851	13.9762	14.4931	14.4671	14.6354	14.5146	14.6825
9.61_396.3107m/z	396.311	9.60902	pos	(10Z)-12-Hydroxyhexadecenoylcarnitine	198020	HMDB0241477		Lipids and lipid-like molecules	Fatty Acyls	Fatty acid esters	M+H-H2O	C23H43NO5	-0.408835	11.5232	11.8316	1.12167	11.4793	12.3731	-0.893859	0.538173	Down	0.00542517	0.0266843	11.8279	11.9766	11.3872	10.9241	11.2805	12.5649	11.9843	12.1007	12.7165	12.4992
11.89_441.2974m/z	441.297	11.8925	pos	11'-Carboxy-alpha-chromanol	52034	HMDB0012515		Lipids and lipid-like molecules	Prenol lipids	Sesquiterpenoids	M+Na	C26H42O4	-0.369656	11.9262	11.7509	1.12106	11.4336	12.2647	-0.831118	0.562094	Down	0.00117769	0.00974645	11.4263	11.6746	11.1823	11.4886	11.396	12.1016	12.8321	11.9602	12.1934	12.2361
12.64_255.2108m/z	255.211	12.6398	pos	18-Nor-4(19),8,11,13-abietatetraene	64462	HMDB0041371		Lipids and lipid-like molecules	Prenol lipids	Diterpenoids	M+H	C19H26	0.2288	12.0019	11.8205	1.1194	11.3714	12.3107	-0.939326	0.521476	Down	0.0115939	0.0451643	11.8613	11.778	10.9269	10.5274	11.7633	12.5504	12.1888	12.3388	12.4742	12.0014
12.50_305.2472m/z	305.247	12.4982	pos	omega-3-Arachidonic acid	1229	HMDB0002177		Lipids and lipid-like molecules	Fatty Acyls	Fatty acids and conjugates	M+H	C20H32O2	-1.08366	15.0216	14.9376	1.11692	13.8193	14.6904	-0.871121	0.546722	Down	0.0041185	0.0222913	14.2588	14.0702	13.6756	13.2577	13.834	14.9318	14.5288	14.2849	15.0386	14.6678
12.77_742.4298m/z	742.43	12.7666	neg	PS(18:2+=O/14:1)	234057	HMDB0280955		Lipids and lipid-like molecules	Glycerophospholipids	Glycerophosphoserines	M-H	C38H66NO11P	-0.359771	14.6978	14.6093	1.11659	13.8224	14.7478	-0.925471	0.526509	Down	0.00966096	0.0399353	14.3907	13.9735	14.206	12.9095	13.6322	14.5449	14.9497	14.6913	14.9367	14.6166
4.14_229.1082m/z	229.108	4.13558	neg	ascr#9	10272			Organic oxygen compounds	Organooxygen compounds	Carbohydrates and carbohydrate conjugates	M-H2O-H	C11H20O6	0.0814526	9.59058	9.56568	1.11634	10.8529	9.93362	0.919256	1.89114	Up	0.00904425	0.0379764	10.6565	10.5419	11.3017	11.5175	10.2467	9.50652	10.1847	9.82866	10.0859	10.0623
12.62_133.1012m/z	133.101	12.621	pos	p-Mentha-1,3,5,8-tetraene	54551	HMDB0029641		Benzenoids	Benzene and substituted derivatives	Phenylpropenes	M+H	C10H12	-0.19719	11.252	11.3697	1.11393	10.7944	11.6182	-0.823788	0.564957	Down	0.00151089	0.0115238	11.2209	10.8559	10.6288	10.2953	10.971	11.8969	11.5974	11.543	11.6176	11.4358
12.62_269.2261m/z	269.226	12.621	pos	Retinol	37368	HMDB0000305	C00473	Lipids and lipid-like molecules	Prenol lipids	Retinoids	M+H-H2O	C20H30O	-1.04723	21.2151	21.4939	1.11352	20.7235	21.5686	-0.845093	0.556675	Down	0.00270906	0.0165998	21.1765	20.8729	20.3945	20.2383	20.9353	21.8748	21.5457	21.5823	21.5367	21.3034
10.39_422.2688m/z	422.269	10.3883	neg	1-(2-methoxy-tetradecanyl)-sn-glycero-3-phosphoethanolamine	21242			Lipids and lipid-like molecules	Glycerophospholipids	Glycerophosphoethanolamines	M-H2O-H	C20H44NO7P	2.39452	13.4817	12.9037	1.11157	13.0081	13.7529	-0.744779	0.596759	Down	3.07766e-05	0.000864563	13.074	12.999	12.9716	12.774	13.2218	13.8226	13.7433	13.8271	13.5599	13.8114
0.72_187.0003m/z	187	0.7231	pos	D-Arabinono-1,4-lactone	255745	HMDB0302833	C00652	Organic oxygen compounds	Organooxygen compounds	Carbohydrates and carbohydrate conjugates	M+K	C5H8O5	-0.537113	11.3662	10.3098	1.11112	9.69208	10.7023	-1.01023	0.496467	Down	0.0261452	0.0809729	9.78342	8.96493	9.14247	9.86154	10.7081	10.1025	11.2462	10.4853	10.6004	11.0772
10.60_427.3660n	428.373	10.6034	pos	Stearoylcarnitine	8290	HMDB0000848		Lipids and lipid-like molecules	Fatty Acyls	Fatty acid esters	M+H, M+Na	C25H49NO4	-0.383549	16.8386	16.6751	1.10906	16.7427	17.5206	-0.777901	0.583215	Down	0.00038737	0.00476919	16.5758	16.9568	16.4271	17.0811	16.6727	17.3269	17.5543	17.4742	17.619	17.6287
3.74_319.0973m/z	319.097	3.74275	neg	1,5-Dihydroxynaphthalene	302739			Benzenoids	Naphthalenes	Naphthols and derivatives	2M-H	C10H8O2	-0.749048	10.3249	11.4591	1.10804	11.5101	10.6231	0.88698	1.8493	Up	0.00681004	0.0310815	11.3948	11.9982	12.0102	11.1738	10.9733	10.4334	10.6748	11.0805	10.4825	10.4443
1.68_325.1081m/z	325.108	1.67997	neg	Ipriflavone	57249	HMDB0032987	D01338	Phenylpropanoids and polyketides	Isoflavonoids	Isoflav-2-enes	M+FA-H	C18H16O3	-0.267707	11.688	11.7113	1.10635	11.9932	11.1505	0.842712	1.79342	Up	0.0031659	0.0185976	11.5636	11.9624	11.9752	12.3249	12.1399	10.7552	11.6837	11.2974	10.9899	11.0262
10.22_376.2500m/z	376.25	10.2243	neg	15-HETE-Gly	8720			Organic acids and derivatives	Carboxylic acids and derivatives	Amino acids, peptides, and analogues	M-H	C22H35NO4	1.77945	9.02927	8.99551	1.10616	10.2998	11.345	-1.04525	0.484561	Down	0.0367325	0.103919	9.91742	10.3919	9.84049	11.0218	10.3273	10.0171	12.0161	11.8975	11.205	11.5894
13.83_343.2628m/z	343.263	13.8322	pos	Docosahexaenoic Acid methyl ester	267183			Lipids and lipid-like molecules	Fatty Acyls	Fatty acid esters	M+H	C23H34O2	-0.931823	10.6145	11.1807	1.10564	10.7296	11.4489	-0.719329	0.60738	Down	3.346e-06	0.000218016	10.6615	10.8031	10.587	10.8488	10.7477	11.4118	11.4172	11.366	11.4378	11.6118
12.60_451.1649m/z	451.165	12.6037	neg	Imiglitazar	207767	HMDB0253429		Organoheterocyclic compounds	Azoles	Oxazoles	M-H2O-H	C28H26N2O5	-2.95736	11.4461	10.6184	1.10537	10.5202	11.3454	-0.825179	0.564412	Down	0.00218244	0.0144854	10.6926	10.8071	10.1794	10.0277	10.8941	11.5989	11.2846	11.3066	11.2837	11.2529
12.50_417.1986m/z	417.199	12.4982	pos	AB-MECA	199096	HMDB0242721		Nucleosides, nucleotides, and analogues	Purine nucleosides	Unclassified	M+NH4	C18H21N7O4	-1.92554	12.2767	11.9831	1.10523	11.4366	12.2372	-0.800577	0.57412	Down	0.00113174	0.00952429	11.9022	11.4623	11.4566	10.9308	11.4312	12.3446	12.1806	12.1142	12.3696	12.177
12.72_692.1722n	715.161	12.7203	pos	Bisphenol A bis(diphenyl phosphate)	202287	HMDB0247001		Benzenoids	Benzene and substituted derivatives	Diphenylmethanes	M+NH4, M+Na	C39H34O8P2	-1.00769	14.8752	14.2556	1.10501	14.1345	14.91	-0.77553	0.584174	Down	0.000355461	0.00452471	14.4009	14.3631	14.0652	13.8792	13.9638	15.085	15.0968	14.699	14.8331	14.8361
10.01_412.3420m/z	412.342	10.0068	pos	Petromyzonol	46161		C16258	Lipids and lipid-like molecules	Steroids and steroid derivatives	Bile acids, alcohols and derivatives	M+NH4	C24H42O4	-0.33081	10.3765	11.1498	1.10449	10.4592	11.482	-1.02276	0.492175	Down	0.0312814	0.0921679	10.7482	11.0571	10.4961	10.8386	9.15612	11.0993	11.394	11.155	12.2086	11.5531
3.81_536.3082m/z	536.308	3.80708	pos	Blumenol C O-[rhamnosyl-(1->6)-glucoside]	56397	HMDB0031935		Lipids and lipid-like molecules	Fatty Acyls	Fatty acyl glycosides	M+NH4	C25H42O11	3.13956	12.3736	13.7654	1.10008	13.5141	12.731	0.783105	1.72083	Up	0.000826029	0.00766286	13.4134	13.8614	13.4139	13.4944	13.3874	12.9267	12.434	12.8664	12.4386	12.9892
9.87_282.2562n	281.249	9.87355	neg	cis-Vaccenic acid	584	HMDB0240219	C08367	Lipids and lipid-like molecules	Fatty Acyls	Fatty acids and conjugates	M-H, M+FA-H	C18H34O2	1.16553	13.187	13.6336	1.0994	13.2851	14.1006	-0.815553	0.568191	Down	0.00236763	0.0153072	13.3938	13.4462	13.2583	13.5049	12.822	13.6739	13.9164	14.1205	14.4345	14.3577
6.56_383.2067m/z	383.207	6.55558	neg	20-Trihydroxy-leukotriene-B4	3892	HMDB0012643		Lipids and lipid-like molecules	Fatty Acyls	Eicosanoids	M-H	C20H32O7	-2.02391	9.30469	7.04205	1.09916	10.2373	11.1547	-0.917368	0.529474	Down	0.0129509	0.0484625	10.3709	10.6062	9.93283	9.48423	10.7922	10.5979	11.5818	11.2672	11.031	11.2953
3.95_405.1459m/z	405.146	3.95027	neg	S-(N,N-Diethylcarbamoyl)glutathione	211080	HMDB0257384		Organic acids and derivatives	Carboxylic acids and derivatives	Amino acids, peptides, and analogues	M-H	C15H26N4O7S	2.3793	10.9196	9.51348	1.09903	9.28482	10.3485	-1.06365	0.478421	Down	0.0423046	0.114564	9.99733	9.36438	8.66079	8.94282	9.45876	11.3086	10.9241	9.72328	10.5163	9.27006
11.79_351.1275m/z	351.128	11.7929	neg	Brivanib	204341	HMDB0249386		Organic oxygen compounds	Organooxygen compounds	Ethers	M-H2O-H	C19H19FN4O3	3.42064	12.2901	12.5092	1.09891	11.8272	12.6046	-0.777361	0.583433	Down	0.000803008	0.00753694	12.2208	11.7497	11.5364	11.689	11.9402	12.5486	12.3025	12.6527	12.6559	12.8632
10.87_634.3360m/z	634.336	10.8705	neg	PC(2:0/PGE1)	241994	HMDB0288894		Lipids and lipid-like molecules	Fatty Acyls	Eicosanoids	M-H	C30H54NO11P	-0.256956	18.2531	17.9265	1.09651	17.4204	18.1405	-0.720107	0.607053	Down	1.75803e-05	0.000637526	17.5556	17.4681	17.5559	17.2077	17.3146	18.2233	18.2159	18.1386	18.1174	18.0072
13.34_256.2404n	255.233	13.3368	neg	Palmitic acid	48	HMDB0000220	C00249	Lipids and lipid-like molecules	Fatty Acyls	Fatty acids and conjugates	M-H, M+FA-H	C16H32O2	0.601948	16.5246	16.661	1.09332	16.1834	16.9207	-0.737341	0.599844	Down	0.000154188	0.00252853	16.5172	16.0079	16.2221	16.0353	16.1345	17.006	16.8806	17.0119	17.0081	16.697
0.68_381.1109m/z	381.111	0.676333	neg	Noroxyhydrastinine	209688	HMDB0255749		Organoheterocyclic compounds	Isoquinolines and derivatives	Isoquinolones and derivatives	2M-H	C10H9NO3	4.48662	18.6501	19.0908	1.09265	17.6536	16.6498	1.00379	2.00526	Up	0.0323518	0.0943357	18.3824	18.0754	17.8512	16.9143	17.0445	17.4462	16.8436	16.2113	16.7821	15.9657
10.13_449.2662m/z	449.266	10.1317	pos	Arlacel A	203670	HMDB0248604		Organoheterocyclic compounds	Furofurans	Isosorbides	M+K	C24H42O5	-0.541477	14.7741	13.6627	1.08992	13.9022	14.6457	-0.743492	0.597292	Down	0.000230586	0.00329119	14.1863	13.9953	14.0444	13.5392	13.7457	14.618	14.725	14.6679	14.5797	14.6378
7.73_167.1065m/z	167.107	7.7308	pos	2E,6E,8E-decatrienoic acid	710			Lipids and lipid-like molecules	Fatty Acyls	Fatty acids and conjugates	M+H	C10H14O2	-0.767891	12.1003	12.0635	1.08941	12.5638	11.7773	0.786449	1.72482	Up	0.00169868	0.0123558	12.4198	12.2531	12.8366	13.0264	12.2829	11.9434	11.8472	11.5779	11.6572	11.8608
3.47_520.9892m/z	520.989	3.46665	pos	phosphoadenosine-5'-phosphosulfate	257277	HMDB0304464		Nucleosides, nucleotides, and analogues	Purine nucleotides	Purine ribonucleotides	M+NH4	C10H11N5O13P2S-4	0.815871	10.7236	11.3658	1.08865	12.2077	11.194	1.01366	2.01902	Up	0.0396729	0.110129	12.1268	12.2523	12.2257	12.8414	11.5922	12.5065	11.3654	10.4976	10.9944	10.6061
7.80_273.1112m/z	273.111	7.80498	neg	Mono-(2-ethyl-5-oxohexyl) phthalate	115423	HMDB0094645		Benzenoids	Benzene and substituted derivatives	Benzoic acids and derivatives	M-H2O-H	C16H20O5	-6.8207	8.41053	7.04205	1.08761	10.9175	10.0899	0.827628	1.77476	Up	0.00386654	0.021392	10.8292	11.1005	10.2854	11.3458	11.0267	10.1654	10.2223	10.3616	9.82349	9.87666
5.78_288.2167m/z	288.217	5.78362	pos	Ethylene brassylate	63625	HMDB0040459		Phenylpropanoids and polyketides	Macrolides and analogues	Unclassified	M+NH4	C15H26O4	-0.848441	10.7141	10.735	1.08542	10.7128	11.6516	-0.938784	0.521672	Down	0.0200388	0.0664462	11.0842	11.0597	10.1697	11.2609	9.9896	11.4223	11.8585	11.0107	11.9916	11.9749
4.87_204.1051m/z	204.105	4.87445	pos	3-Cyclohexyl-1-propylsulfonic acid	199905	HMDB0244400		Organic nitrogen compounds	Organonitrogen compounds	Cyclohexylamines	M+H-H2O	C9H19NO3S	-0.614383	12.381	12.1322	1.0838	15.145	14.2869	0.858194	1.81277	Up	0.00750458	0.0334572	15.1777	14.6131	14.9705	15.8511	15.1129	13.8702	14.5287	14.1833	14.2351	14.617
3.88_132.0445m/z	132.044	3.87572	pos	5,6-Dihydroxyindole	48215	HMDB0004058	C05578	Organoheterocyclic compounds	Indoles and derivatives	Hydroxyindoles	M+H-H2O	C8H7NO2	0.592764	10.4646	7.04205	1.08237	7.04205	8.10547	-1.06342	0.478495	Down	0.0437685	0.11765	7.04205	7.04205	7.04205	7.04205	7.04205	8.90184	8.4755	7.04205	7.04205	9.06592
11.58_290.1386m/z	290.139	11.5766	pos	5-Amino-2,3-dihydro-6-(3-hydroxy-4-methoxy-1-oxobutyl)-2,2-dimethyl-4H-1-benzopyran-4-one	61951	HMDB0038582		Organoheterocyclic compounds	Benzopyrans	1-benzopyrans	M+H-H2O	C16H21NO5	-0.356384	9.91844	9.77431	1.08213	9.86979	10.6587	-0.788867	0.578798	Down	0.00163042	0.0120888	10.0927	9.78355	10.3161	9.70909	9.44744	10.6774	10.8385	10.6079	10.4015	10.768
12.51_401.1489m/z	401.149	12.5074	neg	Carbaryl	204528	HMDB0249612	C07491	Benzenoids	Naphthalenes	Unclassified	2M-H	C12H11NO2	-4.50157	11.2554	11.4277	1.082	10.6345	11.4888	-0.854295	0.553135	Down	0.00791898	0.0348278	10.7766	11.0388	10.2757	10.0174	11.0643	11.8932	11.3554	11.4267	11.6051	11.1638
13.91_383.2964m/z	383.296	13.9094	neg	26:6(8Z,11Z,14Z,17Z,20Z,23Z)	1249			Lipids and lipid-like molecules	Fatty Acyls	Fatty acids and conjugates	M-H	C26H40O2	2.25841	11.8588	12.4734	1.08023	11.4128	12.3559	-0.943007	0.520148	Down	0.0226413	0.0727182	11.1507	11.8546	11.5551	10.5167	11.9871	12.8518	11.74	12.7572	12.2297	12.2007
11.91_314.2686m/z	314.269	11.9131	pos	PsiAabeta	7881			Lipids and lipid-like molecules	Fatty Acyls	Fatty alcohols	M+NH4	C18H32O3	-1.09114	11.5613	11.3166	1.08008	11.23	12.0471	-0.817186	0.567548	Down	0.00445342	0.0234362	11.2374	11.5746	10.8159	10.9223	11.5995	11.5872	12.3638	12.0192	12.0256	12.24
10.55_537.2578m/z	537.258	10.551	neg	Prolyl-phenylalanyl-arginine-4-nitroanilide	212938	HMDB0259666		Organic acids and derivatives	Carboxylic acids and derivatives	Amino acids, peptides, and analogues	M-H	C26H34N8O5	-0.171344	13.7339	13.4896	1.07939	13.6309	14.3636	-0.732629	0.601806	Down	0.000259923	0.00360012	13.8765	13.4217	13.4581	13.7215	13.6769	14.5592	14.3389	14.363	14.0762	14.4807
10.97_466.2949m/z	466.295	10.9724	neg	PE(17:0/0:0)	21191	HMDB0061691		Lipids and lipid-like molecules	Glycerophospholipids	Glycerophosphoethanolamines	M-H	C22H46NO7P	2.04457	15.8782	15.5017	1.07904	15.7171	16.4829	-0.765754	0.588146	Down	0.00105877	0.00918136	15.5969	15.4554	15.6627	16.114	15.7566	16.5361	16.5244	16.7792	16.1198	16.4549
11.22_205.1949m/z	205.195	11.223	pos	beta-Farnesene	59733	HMDB0035913		Lipids and lipid-like molecules	Prenol lipids	Sesquiterpenoids	M+H	C15H24	-0.643819	11.1344	11.1562	1.07841	10.837	11.6211	-0.784088	0.580719	Down	0.00212364	0.0141896	10.8589	10.8655	11.0186	10.4581	10.984	11.3935	11.3134	11.5432	11.7287	12.1268
12.38_535.1397m/z	535.14	12.3797	neg	Formononetin	29176	HMDB0005808	C00858	Phenylpropanoids and polyketides	Isoflavonoids	O-methylated isoflavonoids	2M-H	C16H12O4	-0.296582	13.9009	13.4206	1.07812	13.2415	14.097	-0.855484	0.55268	Down	0.00905379	0.0379764	13.9691	12.7704	13.0024	12.9884	13.4771	14.4971	13.9129	14.2939	13.932	13.8488
2.81_324.2168m/z	324.217	2.80703	pos	Phthalsaurediethylhexylester	210352	HMDB0256506		Benzenoids	Benzene and substituted derivatives	Benzoic acids and derivatives	M+NH4	C18H26O4	-0.579441	16.0895	16.6162	1.0778	16.388	15.6779	0.710059	1.63587	Up	6.65363e-05	0.0014043	16.3091	16.3665	16.2876	16.4251	16.5516	15.5184	15.5681	15.5746	15.7786	15.9499
11.04_430.2222m/z	430.222	11.0355	neg	Stachyflin	211984	HMDB0258481		Organoheterocyclic compounds	Benzopyrans	1-benzopyrans	M+FA-H	C23H31NO4	-3.47194	11.7555	12.1218	1.07769	13.6733	12.7477	0.925589	1.89946	Up	0.0201907	0.0667833	13.3586	13.8811	13.251	14.6594	13.2163	12.6774	13.0243	13.2269	12.3652	12.4446
11.06_446.1413m/z	446.141	11.0562	neg	Bacampicillin	53585	HMDB0015540	C08122	Organoheterocyclic compounds	Lactams	Beta lactams	M-H2O-H	C21H27N3O7S	4.76807	10.6066	10.3943	1.07573	11.5472	10.7733	0.773889	1.70987	Up	0.00134631	0.0106556	11.8876	11.5467	11.0578	11.4249	11.8188	10.7076	10.5868	10.9118	10.7597	10.9004
1.09_469.0540m/z	469.054	1.09482	neg	5-(4-Methoxybenzylidene)-1,3-thiazolidine-2,4-dione	202046	HMDB0246721		Benzenoids	Phenol ethers	Anisoles	2M-H	C11H9NO3S	1.4405	7.04205	10.7172	1.07539	9.35402	10.2916	-0.937618	0.522094	Down	0.021583	0.0703235	9.20324	8.53855	9.77012	9.15652	10.1017	10.826	10.0897	10.5024	9.70997	10.3301
10.87_583.3382m/z	583.338	10.8705	neg	dolichyl beta-D-glucosyl phosphate	37512		C01246	Lipids and lipid-like molecules	Prenol lipids	Polyprenols	M-H2O-H	C31H55O9P	-3.82571	14.98	14.577	1.07441	14.323	15.0312	-0.708141	0.612108	Down	7.69721e-05	0.00153521	14.4941	14.3222	14.398	14.3547	14.046	15.2291	15.0752	15.0313	14.9279	14.8923
12.17_277.2176m/z	277.218	12.1693	neg	alpha-Linolenic acid	657	HMDB0001388	C06427	Lipids and lipid-like molecules	Fatty Acyls	Lineolic acids and derivatives	M-H	C18H30O2	1.09	14.9734	15.395	1.07393	14.6271	15.4218	-0.794641	0.576487	Down	0.00355537	0.0202028	14.9827	14.9163	14.232	14.1319	14.8727	15.5684	15.2764	15.4236	15.5717	15.2686
9.40_396.3106m/z	396.311	9.39933	pos	3-Hydroxy-9-hexadecenoylcarnitine	52257	HMDB0013333		Lipids and lipid-like molecules	Fatty Acyls	Fatty acid esters	M+H-H2O	C23H43NO5	-0.534902	11.7003	11.3053	1.07293	11.6148	12.5087	-0.893882	0.538164	Down	0.0157894	0.0563867	11.7074	11.9733	11.3608	12.1676	10.8649	12.1723	12.2332	12.3102	12.7016	13.126
9.87_425.3518n	470.35	9.87355	neg	(13Z)-Octadec-13-enoylcarnitine	198071	HMDB0241529		Lipids and lipid-like molecules	Fatty Acyls	Fatty acid esters	M-H, M+FA-H	C25H47NO4	3.04569	13.0017	13.4263	1.07283	13.1559	13.9863	-0.830383	0.56238	Down	0.00709188	0.032038	13.2445	13.4146	13.2148	13.3895	12.5163	13.4561	13.8711	13.9821	14.4188	14.2034
0.70_110.0272m/z	110.027	0.69945	pos	Hypotaurine	47323	HMDB0000965	C00519	Organic acids and derivatives	Sulfinic acids and derivatives	Sulfinic acids	M+H	C2H7NO2S	1.77357	12.9422	12.2483	1.07015	11.9213	12.9473	-1.02594	0.49109	Down	0.047948	0.126498	12.1391	12.4601	12.3898	10.1862	12.4316	12.8852	12.9833	13.1013	12.9224	12.8443
10.27_277.1811m/z	277.181	10.2655	neg	7-hydroxy-10E,16-heptadecadien-8-ynoic acid	1811			Lipids and lipid-like molecules	Fatty Acyls	Fatty acids and conjugates	M-H	C17H26O3	0.685152	12.8071	11.8532	1.06932	13.695	14.5303	-0.835253	0.560485	Down	0.00852287	0.0365311	14.2077	13.7199	13.0751	13.78	13.6924	14.0645	14.9697	14.2869	14.7007	14.6295
14.47_283.2647m/z	283.265	14.4675	neg	Methyl 14-methyl-8-hexadecenoate	7266			Lipids and lipid-like molecules	Fatty Acyls	Fatty acid esters	M-H	C18H36O2	1.45929	17.8844	17.5123	1.06885	17.5364	18.2204	-0.684054	0.622414	Down	1.74277e-05	0.000637526	17.4961	17.5309	17.7159	17.4285	17.5105	18.0275	18.3057	18.2515	18.1611	18.3564
9.75_188.0925m/z	188.093	9.74608	neg	Crotonic acid betaine	205307	HMDB0250545		Lipids and lipid-like molecules	Fatty Acyls	Fatty acids and conjugates	M+FA-H	C7H13NO2	-2.10686	9.53581	9.88427	1.06878	9.47579	10.291	-0.815229	0.568318	Down	0.00620858	0.0293436	9.3778	9.91314	9.32343	9.67565	9.08892	9.86312	9.97194	10.295	10.7183	10.6067
10.95_522.3551m/z	522.355	10.9533	pos	PC(18:1/0:0)	19887	HMDB0010385	C04230	Lipids and lipid-like molecules	Glycerophospholipids	Glycerophosphocholines	M+H	C26H52NO7P	-0.538751	19.4804	19.2313	1.06858	18.6935	19.4503	-0.756878	0.591775	Down	0.00115248	0.00963781	18.7982	18.9914	18.7065	18.3813	18.5899	19.7043	19.7217	19.1402	19.3987	19.2868
5.19_691.3523m/z	691.352	5.18858	neg	Lyciumoside VIII	57462	HMDB0033210		Lipids and lipid-like molecules	Prenol lipids	Terpene glycosides	M+FA-H	C32H54O13	-3.65025	12.089	13.2151	1.0685	11.3784	12.268	-0.889667	0.539739	Down	0.0171614	0.0596833	12.0166	11.7783	11.2984	10.5893	11.2092	11.7552	12.7519	12.3513	12.3686	12.1132
8.98_516.2747m/z	516.275	8.97773	neg	PE(0:0/20:4;O)	27931			Lipids and lipid-like molecules	Glycerophospholipids	Glycerophosphoethanolamines	M-H	C25H44NO8P	2.9821	10.4065	11.5803	1.06738	13.5991	12.8163	0.782784	1.72045	Up	0.00316009	0.0185923	13.8634	13.8737	13.1788	13.7423	13.3372	13.1716	13.0011	12.7894	12.5148	12.6046
10.10_256.1920m/z	256.192	10.1014	neg	N-lauroyl glycine	8835	HMDB0013272		Organic acids and derivatives	Carboxylic acids and derivatives	Amino acids, peptides, and analogues	M-H	C14H27NO3	0.552422	9.7277	9.55487	1.06698	9.01503	9.84171	-0.826681	0.563825	Down	0.00661714	0.0305861	8.53214	9.20554	8.60676	9.55558	9.17513	10.0385	9.60651	9.89833	9.53107	10.1342
1.30_187.0416m/z	187.042	1.30498	neg	Bisazobiphenyl	204243	HMDB0249265		Benzenoids	Benzene and substituted derivatives	Unclassified	M-H2O-H	C12H6N4	0.967485	9.00081	8.84	1.06679	8.43417	9.4295	-0.995328	0.501622	Down	0.0383282	0.107518	8.34796	9.00846	8.72142	9.05096	7.04205	9.33521	9.41023	8.92156	9.61297	9.86752
11.48_365.2704m/z	365.27	11.4772	neg	7a,17-dimethyl-5b-Androstane-3a,17b-diol	48647	HMDB0006013		Lipids and lipid-like molecules	Steroids and steroid derivatives	Androstane steroids	M+FA-H	C21H36O2	2.01969	11.906	11.8722	1.06562	11.763	12.5556	-0.792622	0.577294	Down	0.00441852	0.0232833	12.061	11.8567	11.0445	12.175	11.6779	12.5709	12.4122	12.6051	12.5795	12.6105
0.72_332.1104m/z	332.11	0.7156	neg	N-Ribosylhistidine	47801	HMDB0002089		Organic acids and derivatives	Carboxylic acids and derivatives	Amino acids, peptides, and analogues	M+FA-H	C11H17N3O6	1.49005	13.1757	13.0591	1.06381	13.2156	14.0117	-0.796111	0.5759	Down	0.0046282	0.0241024	13.1862	13.8145	13.1411	12.6683	13.268	13.7567	13.8947	14.2016	13.9611	14.2446
0.67_410.1278m/z	410.128	0.6666	neg	2-(acetylamino)-1,5-anhydro-2-deoxy-3-O-b-D-galactopyranosyl-D-arabino-Hex-1-enitol	47890	HMDB0002278		Organic oxygen compounds	Organooxygen compounds	Carbohydrates and carbohydrate conjugates	M+FA-H	C14H23NO10	-7.01183	15.0038	14.8683	1.0634	15.1952	15.9205	-0.725244	0.604895	Down	0.000473757	0.00550967	15.377	15.107	15.3297	14.834	15.3284	16.0989	15.9274	15.7397	15.7505	16.0857
9.31_301.2177m/z	301.218	9.31222	neg	(+-)-Trihydroxy-decipiadiene	36130			Lipids and lipid-like molecules	Prenol lipids	Diterpenoids	M-H2O-H	C20H32O3	1.39344	10.2703	10.1332	1.0632	9.66023	10.5884	-0.928123	0.525542	Down	0.0245897	0.0771136	9.30043	9.7434	10.415	10.1025	8.73987	10.4637	10.1298	10.4465	10.9335	10.9682
1.31_284.0988m/z	284.099	1.31263	pos	Guanosine	46890	HMDB0000133	C00387	Nucleosides, nucleotides, and analogues	Purine nucleosides	Unclassified	M+H	C10H13N5O5	-0.63651	14.8798	16.0371	1.06115	15.4779	14.7884	0.68954	1.61277	Up	7.07996e-05	0.00143463	15.4578	15.594	15.5031	15.5607	15.274	14.7961	14.6995	14.804	15.0412	14.6012
12.62_105.0701m/z	105.07	12.621	pos	2-Phenylethanol	58091	HMDB0033944	C05853	Benzenoids	Benzene and substituted derivatives	Unclassified	M+H-H2O	C8H10O	1.70096	10.5248	10.4776	1.05965	10.0265	10.7875	-0.761048	0.590067	Down	0.00239406	0.0153536	10.5316	9.88066	9.90634	9.72139	10.0924	11.1543	10.6815	10.8142	10.7698	10.5178
13.11_355.2649m/z	355.265	13.1107	neg	4,8,12,15,19,21-tetracosahexaenoic acid	686			Lipids and lipid-like molecules	Fatty Acyls	Fatty acids and conjugates	M-H	C24H36O2	1.78291	16.7579	17.1019	1.05755	16.483	17.2667	-0.783715	0.580869	Down	0.00480854	0.0246546	16.7536	16.7992	16.4128	15.8476	16.6016	17.27	17.1382	17.394	17.5785	16.9528
3.27_352.1045m/z	352.104	3.27183	neg	6''-O-Acetylholocalin	60094	HMDB0036331		Organic oxygen compounds	Organooxygen compounds	Carbohydrates and carbohydrate conjugates	M-H	C16H19NO8	1.94073	10.5918	10.4732	1.05422	12.4355	11.5214	0.914087	1.88438	Up	0.0269264	0.0826862	12.4972	13.1017	11.907	12.8684	11.8032	11.4572	12.0867	11.9521	10.9349	11.1763
12.80_646.2779m/z	646.278	12.8021	pos	Leukotriene C5	52129	HMDB0012993		Organic acids and derivatives	Carboxylic acids and derivatives	Amino acids, peptides, and analogues	M+Na	C30H45N3O9S	1.67366	15.6298	14.5205	1.05289	14.9368	15.7357	-0.798829	0.574815	Down	0.00602785	0.0286934	15.3853	15.134	14.5147	15.14	14.5102	15.9987	16.0281	15.4126	15.6634	15.5755
8.94_334.2141n	357.203	8.93558	pos	Resolvin E2	210903	HMDB0257163		Lipids and lipid-like molecules	Fatty Acyls	Eicosanoids	M+NH4, M+Na	C20H30O4	-1.00629	13.5669	14.1835	1.0516	14.1493	13.4609	0.68843	1.61153	Up	0.000184243	0.00281497	14.2781	14.2615	14.1299	14.0579	14.0193	13.4342	13.5681	13.1593	13.7139	13.4291
10.04_551.1481m/z	551.148	10.0398	neg	Tanshinone I	212174	HMDB0258714		Lipids and lipid-like molecules	Prenol lipids	Diterpenoids	2M-H	C18H12O3	-3.44959	11.2374	11.0026	1.04881	10.7804	11.6825	-0.902082	0.535114	Down	0.0265136	0.0818597	11.4403	10.9091	10.5942	9.71624	11.2421	11.5712	12.1835	11.5148	11.7471	11.3956
4.95_456.1800m/z	456.18	4.9511	neg	Entospletinib	206401	HMDB0251829		Organoheterocyclic compounds	Oxazinanes	Morpholines	M+FA-H	C23H21N7O	2.58063	11.6077	11.9442	1.04854	12.7152	11.7732	0.941971	1.92115	Up	0.0322289	0.094184	12.9457	12.498	11.8224	12.907	13.4027	12.2958	11.4839	12.3054	11.7843	10.9966
6.10_215.1287m/z	215.129	6.10497	neg	Caproleic acid	543	HMDB0031003		Lipids and lipid-like molecules	Fatty Acyls	Fatty acids and conjugates	M+FA-H	C10H18O2	-0.900323	8.56897	8.8688	1.04353	9.82014	8.98327	0.83687	1.78617	Up	0.0150461	0.0542666	9.73934	9.48028	10.3815	10.4104	9.08918	8.98372	9.20545	8.76704	9.14972	8.81043
11.91_536.3710m/z	536.371	11.9131	pos	PE(22:1/0:0)	21229	HMDB0011521		Lipids and lipid-like molecules	Glycerophospholipids	Glycerophosphoethanolamines	M+H	C27H54NO7P	-0.0441968	13.3839	13.0936	1.04332	12.7127	13.4472	-0.734476	0.601036	Down	0.00204589	0.0138323	12.9092	12.8779	12.7798	12.6204	12.3762	13.6165	13.5988	13.2468	13.7371	13.0365
11.37_452.3132m/z	452.313	11.3687	pos	6-MethylHexadecanoylcarnitine	197421	HMDB0240865		Lipids and lipid-like molecules	Fatty Acyls	Fatty acid esters	M+K	C24H47NO4	-1.25033	14.4014	13.945	1.04278	14.0883	14.7746	-0.686289	0.62145	Down	0.000267158	0.0036564	14.1682	14.3057	13.9537	13.8752	14.1386	14.9778	14.9466	14.5895	14.6332	14.7259
0.72_144.0655m/z	144.065	0.7231	pos	Aminoadipic acid	47068	HMDB0000510	C00956	Organic acids and derivatives	Carboxylic acids and derivatives	Amino acids, peptides, and analogues	M+H-H2O	C6H11NO4	-0.264857	13.9137	13.1431	1.04102	13.2018	13.9121	-0.710311	0.611188	Down	0.000886658	0.00809354	13.2193	13.3259	13.3709	13.0565	13.0363	13.8548	14.2028	13.4876	14.0474	13.9678
9.92_423.3345n	424.342	9.92322	pos	(10Z,12Z)-octadeca-10,12-dienoylcarnitine	197378	HMDB0240822		Lipids and lipid-like molecules	Fatty Acyls	Fatty acid esters	M+H, M+Na	C25H45NO4	-0.739493	16.4657	16.977	1.03744	16.5696	17.3464	-0.776803	0.583659	Down	0.00647912	0.0302637	16.5984	16.9712	16.3949	16.9032	15.9802	17.095	17.4233	17.0639	17.5874	17.5624
9.25_309.2077m/z	309.208	9.24802	neg	Plasmodiophorol A	3337			Organic acids and derivatives	Hydroxy acids and derivatives	Medium-chain hydroxy acids and derivatives	M-H	C18H30O4	1.79089	8.73585	9.43573	1.03669	11.2914	10.4581	0.833375	1.78185	Up	0.0141872	0.0518724	11.2487	11.3646	10.6905	11.8996	11.2537	9.81809	10.9779	10.5148	10.5077	10.4718
5.59_201.1130m/z	201.113	5.59298	neg	2-Hydroxy-2,6,6-trimethylcyclohexanone	60674	HMDB0037023		Organic oxygen compounds	Organooxygen compounds	Carbonyl compounds	M+FA-H	C9H16O2	-1.66008	9.8338	9.47297	1.03334	10.4687	9.63332	0.835386	1.78433	Up	0.0183137	0.0626529	10.1951	10.0492	11.0783	11.1428	9.87804	9.59252	9.7771	9.28717	9.78648	9.72333
5.70_178.0506m/z	178.051	5.69918	neg	Indoxyl	48231	HMDB0004094	C05658	Organoheterocyclic compounds	Indoles and derivatives	Hydroxyindoles	M+FA-H	C8H7NO	-2.98177	11.2755	10.1125	1.03156	10.8545	11.6325	-0.778011	0.58317	Down	0.00690475	0.0314418	10.9543	10.8957	11.069	10.9108	10.4427	11.7075	12.1688	11.0976	11.8367	11.352
3.66_394.1642m/z	394.164	3.65998	pos	Asp-Pro-Tyr	264701			Organic acids and derivatives	Carboxylic acids and derivatives	Amino acids, peptides, and analogues	M+H	C18H23N3O7	8.50705	11.4866	12.8484	1.0312	12.4194	11.6202	0.79912	1.74004	Up	0.0110012	0.0435356	12.1414	12.7855	12.2949	12.1175	12.7574	11.887	11.9962	11.5462	11.7643	10.9074
5.54_109.1013m/z	109.101	5.54318	pos	4-Methyl-6-hepten-3-one	9919			Organic oxygen compounds	Organooxygen compounds	Carbonyl compounds	M+H-H2O	C8H14O	1.35081	13.5526	13.5522	1.03029	14.1202	13.4116	0.708532	1.63414	Up	0.00205194	0.0138353	13.9835	14.0437	14.482	14.4012	13.6905	13.4208	13.6005	13.2567	13.2896	13.4905
2.24_265.0833m/z	265.083	2.23578	neg	N-(4-Aminobenzoyl)-L-glutamic acid	209047	HMDB0255007		Organic acids and derivatives	Carboxylic acids and derivatives	Amino acids, peptides, and analogues	M-H	C12H14N2O5	1.21367	12.0571	11.7869	1.02823	11.8171	12.607	-0.78983	0.578412	Down	0.0110254	0.0435879	11.6121	11.7039	11.572	11.5221	12.6756	12.739	12.3463	12.4446	12.9253	12.5797
10.23_425.3502n	426.357	10.2335	pos	Vaccenyl carnitine	48712	HMDB0006351		Lipids and lipid-like molecules	Fatty Acyls	Fatty acid esters	M+H, M+Na	C25H47NO4	-0.758451	17.6492	18.2472	1.0261	17.8666	18.6111	-0.744449	0.596896	Down	0.0051295	0.025609	17.9369	18.1831	17.7752	18.0685	17.3695	18.2312	18.4998	18.4883	18.9091	18.9271
1.28_281.9747m/z	281.975	1.28498	neg	Iodohistamine	207854	HMDB0253529		Organoheterocyclic compounds	Azoles	Imidazoles	M+FA-H	C5H8IN3	0.905912	8.45673	7.04205	1.02587	9.68592	8.88662	0.799296	1.74025	Up	0.012837	0.0481554	9.65639	9.1676	9.72985	10.3871	9.48866	8.53694	9.32389	8.97406	8.55562	9.0426
1.96_193.1311m/z	193.131	1.95635	pos	2-Amino-3-methyl-1-pyrrolidin-1-YL-butan-1-one	202235	HMDB0246938		Organic acids and derivatives	Carboxylic acids and derivatives	Amino acids, peptides, and analogues	M+Na	C9H18N2O	-0.327636	11.0649	10.4482	1.02486	9.85998	10.5515	-0.691544	0.619191	Down	0.00126723	0.0102328	9.95113	9.89065	9.44594	10.0068	10.0054	10.4684	10.6949	10.8179	10.2637	10.5126
11.20_383.2925m/z	383.292	11.203	neg	N-palmitoyl glutamine	8704			Organic acids and derivatives	Carboxylic acids and derivatives	Amino acids, peptides, and analogues	M-H	C21H40N2O4	2.41653	10.5515	10.2625	1.02424	10.2269	11.0181	-0.791109	0.5779	Down	0.0128446	0.0481554	10.232	10.5337	9.93423	9.58555	10.8493	10.6267	10.904	11.1517	11.1974	11.2105
10.15_102.1280m/z	102.128	10.1522	pos	Hexylamine	56698	HMDB0032323	C08306	Organic nitrogen compounds	Organonitrogen compounds	Amines	M+H	C6H15N	2.62364	13.7686	14.1981	1.02404	13.8923	13.2251	0.667147	1.58793	Up	0.000409201	0.00495028	13.6716	13.896	13.7318	13.9644	14.1976	13.1623	13.1079	13.0976	13.3036	13.4542
11.93_623.3160m/z	623.316	11.9338	pos	PI(20:3/0:0)	24888			Lipids and lipid-like molecules	Glycerophospholipids	Glycerophosphoinositols	M+H	C29H51O12P	-4.94996	15.2738	14.9084	1.02247	14.7348	15.4506	-0.715835	0.608852	Down	0.00279964	0.01705	15.1913	14.736	14.5001	14.399	14.8476	15.4749	15.7675	15.4912	15.221	15.2987
10.01_393.1622m/z	393.162	10.0068	pos	loganate	257222	HMDB0304409		Lipids and lipid-like molecules	Prenol lipids	Terpene glycosides	M+NH4	C16H23O10-	-1.9032	10.7755	10.4909	1.0223	9.84346	10.6977	-0.854238	0.553158	Down	0.0247496	0.0774321	10.5518	10.1543	10.0648	8.78632	9.66011	10.5957	10.9902	10.7187	10.5659	10.6181
5.70_134.0605m/z	134.06	5.69918	neg	5-(2-Furanyl)-3,4-dihydro-2H-pyrrole	63246	HMDB0040013		Organoheterocyclic compounds	Heteroaromatic compounds	Unclassified	M-H	C8H9NO	-4.98472	10.8763	9.61769	1.0216	10.4267	11.2112	-0.784533	0.58054	Down	0.0097812	0.0401825	10.5641	10.5111	10.6837	10.3942	9.98022	11.2494	11.7663	10.5857	11.4392	11.0154
12.30_326.2705m/z	326.271	12.2961	neg	N-palmitoyl alanine	8700			Organic acids and derivatives	Carboxylic acids and derivatives	Amino acids, peptides, and analogues	M-H	C19H37NO3	1.42952	10.5139	10.5265	1.02059	10.4607	11.291	-0.830373	0.562384	Down	0.0222438	0.0716146	10.4967	10.7891	10.3126	10.0944	10.6107	10.3817	11.7351	11.9092	11.3135	11.1157
9.94_242.2840m/z	242.284	9.94487	pos	1-Hexadecene	199424	HMDB0243889		Hydrocarbons	Unsaturated hydrocarbons	Unsaturated aliphatic hydrocarbons	M+NH4	C16H32	-0.96952	10.7431	10.5104	1.02006	10.2228	10.9103	-0.687499	0.620929	Down	0.00125588	0.0102086	10.6056	10.1188	10.2603	10.113	10.0164	11.1648	10.903	10.6307	11.0737	10.7794
0.68_606.0775m/z	606.078	0.676333	neg	Uridine diphosphate-N-acetylgalactosamine	46988	HMDB0000304		Nucleosides, nucleotides, and analogues	Pyrimidine nucleotides	Pyrimidine nucleotide sugars	M-H	C17H27N3O17P2	5.35496	16.7298	17.1142	1.01962	17.054	16.2694	0.784576	1.72259	Up	0.0102382	0.0415041	17.3531	16.9958	16.8733	16.7886	17.2593	16.7478	15.5794	16.6168	16.3261	16.0771
10.36_452.3732m/z	452.373	10.3572	pos	7alpha,12alpha,(25R)26-Trihydroxy-5beta-cholestan-3-one	46547			Lipids and lipid-like molecules	Steroids and steroid derivatives	Bile acids, alcohols and derivatives	M+NH4	C27H46O4	-0.534747	11.8442	12.2387	1.01949	12.1674	12.9111	-0.74371	0.597201	Down	0.00562452	0.0273132	11.9765	12.4417	12.0818	12.5838	11.753	12.5469	13.0162	12.6835	13.0883	13.2205
9.02_405.2244m/z	405.224	9.01718	pos	Terazosin	53380	HMDB0015293	C07127	Organoheterocyclic compounds	Diazinanes	Piperazines	M+NH4	C19H25N5O4	-0.0895015	12.7608	13.1723	1.01805	12.9117	12.1944	0.717358	1.64417	Up	0.00298293	0.0179393	13.1715	12.9074	12.6299	12.9654	12.8843	11.8205	12.3144	11.8684	12.4426	12.5259
4.41_212.0020m/z	212.002	4.40748	neg	Indoxyl sulfate	47156	HMDB0000682		Organic acids and derivatives	Organic sulfuric acids and derivatives	Arylsulfates	M-H	C8H7NO4S	-1.44721	17.0874	16.3188	1.01758	17.5488	16.6508	0.898025	1.86351	Up	0.0416731	0.113431	17.6773	16.9293	18.0647	17.2874	17.7853	17.0478	17.603	16.4074	16.4312	15.7646
0.72_243.0854n	244.093	0.7231	pos	Cytidine	46865	HMDB0000089	C00475	Nucleosides, nucleotides, and analogues	Pyrimidine nucleosides	Unclassified	M+H, M+K, M+Na	C9H13N3O5	-0.515198	15.652	14.7246	1.01676	14.5596	15.3926	-0.833053	0.56134	Down	0.0211064	0.0690677	14.1544	14.7236	15.3398	13.8883	14.6918	15.2303	15.749	15.3291	15.689	14.9658
3.67_229.1558m/z	229.156	3.669	neg	Leu-Val	266188			Organic acids and derivatives	Carboxylic acids and derivatives	Amino acids, peptides, and analogues	M-H	C11H22N2O3	-0.0418421	8.8929	8.64683	1.01658	9.38925	8.69247	0.696784	1.62089	Up	0.00190534	0.0132181	9.30375	9.30708	9.76781	9.40413	9.16349	8.5576	8.667	8.56863	9.14156	8.52755
9.66_643.2501m/z	643.25	9.66338	neg	1,10-Bis(carboxymethylthio)decane	199578	HMDB0244052		Organic acids and derivatives	Carboxylic acids and derivatives	Dicarboxylic acids and derivatives	2M-H	C14H26O4S2	4.52854	14.5027	14.4639	1.01562	14.0187	13.2477	0.770969	1.70642	Up	0.00975185	0.0401032	13.8075	13.9316	14.2797	14.2672	13.8075	12.7233	12.9333	13.2276	13.4831	13.8713
9.17_302.3051m/z	302.305	9.17308	pos	Enigmol	39000			Organic nitrogen compounds	Organonitrogen compounds	Amines	M+H	C18H39NO2	-0.969639	15.5075	14.8217	1.01432	14.7797	15.4305	-0.650713	0.636966	Down	0.000313716	0.00413007	15.0156	14.8573	14.6595	14.7057	14.6606	15.6212	15.3599	15.1817	15.381	15.6084
10.14_438.2634m/z	438.263	10.1416	neg	PE(14:0(13Me)/0:0)	21235			Lipids and lipid-like molecules	Glycerophospholipids	Glycerophosphoethanolamines	M-H	C20H42NO7P	1.72488	12.9729	12.4993	1.01418	12.5348	13.1626	-0.627845	0.647142	Down	8.12909e-05	0.00158507	12.7759	12.249	12.5157	12.5776	12.5556	13.1582	13.1913	13.1893	13.1111	13.1631
1.30_434.9867m/z	434.987	1.30498	neg	Fosfosal	206950	HMDB0252467		Organic acids and derivatives	Organic phosphoric acids and derivatives	Phosphate esters	2M-H	C7H7O6P	-4.83786	12.1338	12.3737	1.01386	11.806	11.1341	0.671838	1.5931	Up	0.000987345	0.00873286	11.7967	11.4839	12.1001	12.0456	11.6035	11.2475	10.9885	11.1703	11.2537	11.0106
12.62_95.0858m/z	95.0858	12.621	pos	(3E,5Z)-1,3,5-Heptatriene	83395	HMDB0061889		Hydrocarbons	Unsaturated hydrocarbons	Olefins	M+H	C7H10	3.24241	12.8451	12.9842	1.01352	12.3806	13.0966	-0.715935	0.608811	Down	0.00398781	0.0218808	12.7556	12.6126	12.0553	11.9466	12.533	13.3417	13.1621	13.0232	13.1066	12.8492
3.81_269.1592m/z	269.159	3.80708	pos	Valerylcarnitine	52186	HMDB0013128		Lipids and lipid-like molecules	Fatty Acyls	Fatty acid esters	M+Na	C12H24NO4+	-2.33757	14.3684	15.6319	1.0127	15.3489	14.6942	0.654712	1.5743	Up	0.000515545	0.00577684	15.2982	15.5824	15.1802	15.4472	15.2367	14.8799	14.4111	14.7372	14.5657	14.877
11.77_464.3157m/z	464.316	11.7707	neg	PE(O-18:1/0:0)	21239			Lipids and lipid-like molecules	Glycerophospholipids	Glycerophosphoethanolamines	M-H	C23H48NO6P	2.35599	17.6979	17.1352	1.01269	17.5121	18.1936	-0.681544	0.623498	Down	0.00138796	0.0108773	17.3615	17.2744	17.4138	18.0562	17.4544	18.2328	18.2498	18.2349	18.0908	18.1598
0.69_104.0709m/z	104.071	0.687833	pos	Tromethamine	197046	HMDB0240288	C07182	Organic nitrogen compounds	Organonitrogen compounds	Amines	M+H-H2O	C4H11NO3	2.32725	13.0804	13.1033	1.01262	13.3942	14.0327	-0.638481	0.642389	Down	0.000231844	0.00329119	13.7115	13.3364	13.3979	13.1961	13.3291	13.8232	14.1188	14.0796	14.0454	14.0962
12.62_175.1480m/z	175.148	12.621	pos	2,4,5,7alpha-Tetrahydro-1,4,4,7a-tetramethyl-1H-inden-2-ol	60362	HMDB0036684		Organic oxygen compounds	Organooxygen compounds	Alcohols and polyols	M+H-H2O	C13H20O	-0.729872	12.7438	12.8907	1.01235	12.4178	13.1168	-0.698969	0.616012	Down	0.00271689	0.0166222	12.7584	12.5909	12.2188	11.9484	12.5727	13.3301	13.1415	13.1178	13.1214	12.8732
9.75_283.1531m/z	283.153	9.74608	neg	Arginyl-Gamma-glutamate	53762	HMDB0028723		Organic acids and derivatives	Carboxylic acids and derivatives	Amino acids, peptides, and analogues	M-H2O-H	C11H22N6O4	2.28136	10.9652	10.9228	1.01107	10.669	11.465	-0.795957	0.575961	Down	0.0169976	0.0593207	10.3546	10.9114	10.7521	10.5811	10.7458	11.2481	10.7446	11.2848	11.9779	12.0695
4.93_325.1198m/z	325.12	4.92917	neg	(2S)-2-[[(2S)-2-Aminopropanoyl]-naphthalen-2-ylamino]pentanedioic acid	213300	HMDB0260140		Organic acids and derivatives	Carboxylic acids and derivatives	Amino acids, peptides, and analogues	M-H2O-H	C18H20N2O5	1.23103	8.97791	8.65459	1.01092	9.19673	10.0877	-0.891007	0.539238	Down	0.0461375	0.122859	9.9509	9.27398	8.38092	8.43069	9.94714	9.91541	9.84696	10.6194	10.2397	9.81718
10.50_270.3153m/z	270.315	10.5016	pos	1-Octadecene	9436			Hydrocarbons	Unsaturated hydrocarbons	Unsaturated aliphatic hydrocarbons	M+NH4	C18H36	-0.903826	13.1433	12.4373	1.00862	12.127	12.8564	-0.729433	0.603141	Down	0.00552457	0.0270399	12.3335	12.3253	11.8941	12.1698	11.9121	13.3792	12.6883	12.3633	13.0069	12.8442
13.07_325.2753m/z	325.275	13.0698	neg	MG(17:0/0:0/0:0)[rac]	10432			Lipids and lipid-like molecules	Glycerolipids	Monoradylglycerols	M-H2O-H	C20H40O4	1.48834	10.4908	10.4793	1.00859	10.4019	11.0751	-0.673157	0.627133	Down	0.00151694	0.0115479	10.2781	10.4843	10.3443	10.7165	10.1863	10.712	11.0349	11.0466	11.3608	11.2211
5.83_134.0605m/z	134.06	5.83233	neg	N-Hydroxyphenetidine	209177	HMDB0255158		Benzenoids	Phenol ethers	Unclassified	M-H2O-H	C8H11NO2	-4.4651	10.3301	10.2788	1.00804	10.1354	10.8574	-0.72199	0.606261	Down	0.00473197	0.0243874	10.1798	10.1758	10.5145	9.58568	10.2213	10.692	11.2862	10.8236	10.7417	10.7437
0.76_213.1232m/z	213.123	0.75615	pos	Prolylproline	51198	HMDB0011180		Organic acids and derivatives	Carboxylic acids and derivatives	Amino acids, peptides, and analogues	M+H	C10H16N2O3	-0.652831	13.313	12.318	1.00793	13.2074	12.4137	0.793752	1.73358	Up	0.0192989	0.0650198	13.2298	13.6414	13.8131	12.8871	12.4658	12.5315	12.7182	12.1041	12.1827	12.532
1.11_213.1232m/z	213.123	1.11195	pos	Hydroxyprolyl-Valine	53900	HMDB0028876		Organic acids and derivatives	Carboxylic acids and derivatives	Amino acids, peptides, and analogues	M+H-H2O	C10H18N2O4	-0.647596	13.5105	13.2018	1.00746	13.712	12.9695	0.742445	1.67301	Up	0.00920446	0.0384065	13.8005	13.8696	14.0718	13.3868	13.4313	13.2158	13.5011	12.5647	12.8927	12.6734
6.80_407.2037m/z	407.204	6.80128	pos	Berkeleylactone E	7906			Unclassified	Unclassified	Unclassified	M+Na	C20H32O7	-0.951357	12.0144	12.4669	1.00501	13.2546	12.483	0.771651	1.70722	Up	0.0127457	0.0481163	13.2561	13.2711	13.4444	13.3183	12.9831	11.7206	12.9976	12.2185	12.7977	12.6804
0.70_258.0385m/z	258.039	0.699767	neg	Glucosamine 6-phosphate	47474	HMDB0001254	C00352	Organic oxygen compounds	Organooxygen compounds	Carbohydrates and carbohydrate conjugates	M-H	C6H14NO8P	0.346446	11.9789	12.2687	1.00353	11.012	11.7816	-0.769637	0.586565	Down	0.0125954	0.0478049	11.1394	11.2875	10.5416	11.3946	10.6968	12.1167	12.179	11.7514	11.6299	11.2311
11.06_417.1384m/z	417.138	11.0562	neg	Oleoside dimethyl ester	55924	HMDB0031350		Lipids and lipid-like molecules	Prenol lipids	Terpene glycosides	M-H	C18H26O11	-4.49847	11.6653	11.1959	1.00207	12.8679	12.2238	0.644045	1.5627	Up	0.000516494	0.00577684	12.9208	12.9544	12.6622	12.6501	13.1519	12.416	12.013	12.1913	12.2264	12.2724
12.51_457.1808m/z	457.181	12.5074	neg	Cinalukast	52915	HMDB0014725		Benzenoids	Benzene and substituted derivatives	Anilides	M+FA-H	C23H28N2O3S	1.36043	12.5345	12.5526	1.00201	12.3745	13.1276	-0.753072	0.593339	Down	0.0110672	0.04371	12.6254	12.5718	12.2437	11.6006	12.8311	13.2994	13.1858	13.2369	13.0598	12.856
13.24_370.2772m/z	370.277	13.2402	pos	N-Stearoyl Cysteine	198458	HMDB0241940		Organic acids and derivatives	Carboxylic acids and derivatives	Amino acids, peptides, and analogues	M+H-H2O	C21H41NO3S	-0.671389	15.9876	16.1579	1.00162	16.1928	16.8648	-0.671946	0.627659	Down	0.00176538	0.0126656	16.1298	16.2929	16.1117	15.8019	16.6278	17.046	16.7981	16.7171	16.9329	16.8297
8.57_536.3345m/z	536.335	8.56773	pos	PS(20:0/0:0)	22442			Lipids and lipid-like molecules	Glycerophospholipids	Glycerophosphoserines	M+H-H2O	C26H52NO9P	-0.277297	10.6855	11.4569	1.00091	13.4071	12.6304	0.776729	1.71324	Up	0.0169605	0.0592854	13.7408	13.9576	13.1927	13.0633	13.0812	13.1572	12.8076	12.6312	12.0602	12.4959
