# Supplementary material for: Spatial Resolved Metabolomics via AFADESI-MSI Reveals Lipid Metabolic Alterations in Aging Lungs
Source: Research Square preprint supplement (doi:10.21203/rs.3.rs-7113832/v1), 2025-07-28
Supplement: Supplementary file 2 [file 63482bd15868ab050ca0e435.docx]

**Table S4.** **metabolites associated with the biosynthesis of unsaturated fatty acids and arachidonic acid metabolism in aging lungs**

| **Metabolites** | **Isomers** | **Formula** | **Adduct** | **KEGG** | **log2(FC)** | **m/z** | **P-value** |
| --- | --- | --- | --- | --- | --- | --- | --- |
| Adrenic acid |  | C22H36O2 | +K | Biosynthesis of unsaturated fatty acids | -0.20404493 | 371.23474 | 7.3E-22 |
| Palmitic acid |  | C16H32O2 | +NH4 | Biosynthesis of unsaturated fatty acids | -0.16305926 | 274.27407 | 2.3E-16 |
| Oleic acid |  | C18H34O2 | -H | Biosynthesis of unsaturated fatty acids | 0.5316347 | 281.24864 | 8.4E-25 |
| Linoleic acid |  | C18H32O2 | -H | Biosynthesis of unsaturated fatty acids | 0.60307426 | 279.23300 | 2.9E-31 |
| gamma-Linolenic acid | alpha-Linolenic acid | C18H30O2 | -H | Biosynthesis of unsaturated fatty acids | 0.34820222 | 277.21736 | 1.8E-15 |
| Dihomo-gamma-linolenic acid | Dihomo-alpha-linolenic acid | C20H34O2 | +Na-2H | Biosynthesis of unsaturated fatty acids | 0.12930976 | 327.23057 | 0.00356 |
| Eicosapentaenoic acid |  | C20H30O2 | -H | Biosynthesis of unsaturated fatty acids | 0.55478928 | 301.21734 | 7E-41 |
| 11Z-Eicosenoic acid |  | C20H38O2 | -H | Biosynthesis of unsaturated fatty acids | 0.65836813 | 309.27996 | 2.4E-39 |
| Docosahexaenoic acid |  | C22H32O2 | -H | Biosynthesis of unsaturated fatty acids | 0.13210691 | 327.23298 | 0.00254 |
| Arachidonic acid |  | C20H32O2 | -H | Biosynthesis of unsaturated fatty acids| Arachidonic acid metabolism | 0.30456107 | 303.23298 | 3.9E-12 |
| 12-Keto-tetrahydro-leukotriene B4 | 14,15-DiHETrE | C20H34O4 | -H2O-H | Arachidonic acid metabolism | 1.95586002 | 319.22794 | 3E-101 |
| 8,9-DiHETrE |
| 11,12-DiHETrE |
| 5,6-DHET |
| Leukotriene B4 | Hepoxilin A3 | C20H32O4 | -H2O-H | Arachidonic acid metabolism | 1.51765121 | 317.21223 | 7E-101 |
| Hepoxilin B3 |
| 11H-14,15-EETA |
| 15H-11,12-EETA |
| 12(S)-Leukotriene B4 |
