# Supplementary material for: Spatial Resolved Metabolomics via AFADESI-MSI Reveals Lipid Metabolic Alterations in Aging Lungs
Source: Research Square preprint supplement (doi:10.21203/rs.3.rs-7113832/v1), 2025-07-28
Supplement: Supplementary file 3 [file 7350247b82e0706394db0be0.xlsx]

## Sheet: 24m_3m-all
Table S3. 69 KEGG pathway enrichment of AFADESI-MSI
ID Annotation	Annotation	in set	set	in background	background	RichFactor	p-value	-lg(p-value)	FDR correction	Matching IDs	URL
mmu01040	Biosynthesis of unsaturated fatty acids	13	45	69	3244	0.188406	2.42661e-12	11.615	1.67436e-10	C00219 C00249 C00712 C01595 C03242 C06426 C06427 C06428 C06429 C16522 C16525 C16526 C16527	https://www.genome.jp/kegg-bin/show_pathway?mmu01040/mmu:C00219%09red/mmu:C00249%09blue/mmu:C00712%09red/mmu:C01595%09red/mmu:C03242%09red/mmu:C06426%09red/mmu:C06427%09red/mmu:C06428%09red/mmu:C06429%09red/mmu:C16522%09red/mmu:C16525%09red/mmu:C16526%09red/mmu:C16527%09blue
mmu00590	Arachidonic acid metabolism	11	45	75	3244	0.146667	2.58271e-09	8.58792	8.91036e-08	C00219 C02165 C04853 C14772 C14773 C14774 C14775 C14781 C14808 C14810 C14813	https://www.genome.jp/kegg-bin/show_pathway?mmu00590/mmu:C00219%09red/mmu:C02165%09red/mmu:C04853%09red/mmu:C14772%09red/mmu:C14773%09red/mmu:C14774%09red/mmu:C14775%09red/mmu:C14781%09red/mmu:C14808%09red/mmu:C14810%09red/mmu:C14813%09red
mmu00591	Linoleic acid metabolism	5	45	28	3244	0.178571	3.17163e-05	4.49872	0.000729475	C00219 C01595 C03242 C04056 C06426	https://www.genome.jp/kegg-bin/show_pathway?mmu00591/mmu:C00219%09red/mmu:C01595%09red/mmu:C03242%09red/mmu:C04056%09red/mmu:C06426%09red
mmu05140	Leishmaniasis	2	45	6	3244	0.333333	0.00272471	2.56468	0.0470013	C00219 C02737	https://www.genome.jp/kegg-bin/show_pathway?mmu05140/mmu:C00219%09red/mmu:C02737%09blue
mmu00061	Fatty acid biosynthesis	4	45	56	3244	0.0714286	0.00701815	2.15378	0.0968505	C00249 C00712 C06424 C08362	https://www.genome.jp/kegg-bin/show_pathway?mmu00061/mmu:C00249%09blue/mmu:C00712%09red/mmu:C06424%09red/mmu:C08362%09red
mmu05146	Amoebiasis	2	45	13	3244	0.153846	0.0133197	1.87551	0.151835	C00219 C02737	https://www.genome.jp/kegg-bin/show_pathway?mmu05146/mmu:C00219%09red/mmu:C02737%09blue
mmu04923	Regulation of lipolysis in adipocytes	2	45	14	3244	0.142857	0.0154036	1.81238	0.151835	C00020 C00219	https://www.genome.jp/kegg-bin/show_pathway?mmu04923/mmu:C00020%09blue/mmu:C00219%09red
mmu04726	Serotonergic synapse	2	45	17	3244	0.117647	0.0224225	1.64932	0.193394	C00219 C14775	https://www.genome.jp/kegg-bin/show_pathway?mmu04726/mmu:C00219%09red/mmu:C14775%09red
mmu04925	Aldosterone synthesis and secretion	2	45	21	3244	0.0952381	0.0334324	1.47583	0.256315	C00020 C00219	https://www.genome.jp/kegg-bin/show_pathway?mmu04925/mmu:C00020%09blue/mmu:C00219%09red
mmu03320	PPAR signaling pathway	1	45	3	3244	0.333333	0.0410532	1.38665	0.257515	C02165	https://www.genome.jp/kegg-bin/show_pathway?mmu03320/mmu:C02165%09red
mmu05322	Systemic lupus erythematosus	1	45	3	3244	0.333333	0.0410532	1.38665	0.257515	C02737	https://www.genome.jp/kegg-bin/show_pathway?mmu05322/mmu:C02737%09blue
mmu04150	mTOR signaling pathway	1	45	4	3244	0.25	0.0543678	1.26466	0.288567	C00020	https://www.genome.jp/kegg-bin/show_pathway?mmu04150/mmu:C00020%09blue
mmu04151	PI3K-Akt signaling pathway	1	45	4	3244	0.25	0.0543678	1.26466	0.288567	C00020	https://www.genome.jp/kegg-bin/show_pathway?mmu04151/mmu:C00020%09blue
mmu00770	Pantothenate and CoA biosynthesis	2	45	30	3244	0.0666667	0.0640411	1.19354	0.292681	C00183 C03492	https://www.genome.jp/kegg-bin/show_pathway?mmu00770/mmu:C00183%09blue/mmu:C03492%09blue
mmu04068	FoxO signaling pathway	1	45	5	3244	0.2	0.0675015	1.17069	0.292681	C00020	https://www.genome.jp/kegg-bin/show_pathway?mmu04068/mmu:C00020%09blue
mmu00010	Glycolysis / Gluconeogenesis	2	45	31	3244	0.0645161	0.0678681	1.16833	0.292681	C00221 C00267	https://www.genome.jp/kegg-bin/show_pathway?mmu00010/mmu:C00221%09blue/mmu:C00267%09blue
mmu04912	GnRH signaling pathway	1	45	6	3244	0.166667	0.0804569	1.09444	0.323198	C00219	https://www.genome.jp/kegg-bin/show_pathway?mmu04912/mmu:C00219%09red
mmu04080	Neuroactive ligand-receptor interaction	2	45	40	3244	0.05	0.105358	0.977333	0.323198	C00245 C02165	https://www.genome.jp/kegg-bin/show_pathway?mmu04080/mmu:C00245%09red/mmu:C02165%09red
mmu04211	Longevity regulating pathway	1	45	8	3244	0.125	0.105842	0.975343	0.323198	C00020	https://www.genome.jp/kegg-bin/show_pathway?mmu04211/mmu:C00020%09blue
mmu04666	Fc gamma R-mediated phagocytosis	1	45	8	3244	0.125	0.105842	0.975343	0.323198	C00219	https://www.genome.jp/kegg-bin/show_pathway?mmu04666/mmu:C00219%09red
mmu04740	Olfactory transduction	1	45	8	3244	0.125	0.105842	0.975343	0.323198	C00020	https://www.genome.jp/kegg-bin/show_pathway?mmu04740/mmu:C00020%09blue
mmu04217	Necroptosis	1	45	9	3244	0.111111	0.118276	0.927103	0.323198	C00219	https://www.genome.jp/kegg-bin/show_pathway?mmu04217/mmu:C00219%09red
mmu04730	Long-term depression	1	45	9	3244	0.111111	0.118276	0.927103	0.323198	C00219	https://www.genome.jp/kegg-bin/show_pathway?mmu04730/mmu:C00219%09red
mmu05032	Morphine addiction	1	45	9	3244	0.111111	0.118276	0.927103	0.323198	C00020	https://www.genome.jp/kegg-bin/show_pathway?mmu05032/mmu:C00020%09blue
mmu04022	cGMP-PKG signaling pathway	1	45	10	3244	0.1	0.130541	0.884253	0.323198	C00020	https://www.genome.jp/kegg-bin/show_pathway?mmu04022/mmu:C00020%09blue
mmu04928	Parathyroid hormone synthesis, secretion and action	1	45	10	3244	0.1	0.130541	0.884253	0.323198	C00020	https://www.genome.jp/kegg-bin/show_pathway?mmu04928/mmu:C00020%09blue
mmu00052	Galactose metabolism	2	45	46	3244	0.0434783	0.132819	0.876741	0.323198	C00267 C00984	https://www.genome.jp/kegg-bin/show_pathway?mmu00052/mmu:C00267%09blue/mmu:C00984%09blue
mmu02010	ABC transporters	3	45	93	3244	0.0322581	0.137014	0.863236	0.323198	C00183 C00245 C01487	https://www.genome.jp/kegg-bin/show_pathway?mmu02010/mmu:C00183%09blue/mmu:C00245%09red/mmu:C01487%09blue
mmu04664	Fc epsilon RI signaling pathway	1	45	11	3244	0.0909091	0.142639	0.845761	0.323198	C00219	https://www.genome.jp/kegg-bin/show_pathway?mmu04664/mmu:C00219%09red
mmu00230	Purine metabolism	3	45	95	3244	0.0315789	0.143448	0.843307	0.323198	C00020 C00362 C01367	https://www.genome.jp/kegg-bin/show_pathway?mmu00230/mmu:C00020%09blue/mmu:C00362%09blue/mmu:C01367%09blue
mmu00053	Ascorbate and aldarate metabolism	2	45	49	3244	0.0408163	0.147113	0.832348	0.323198	C01041 C02670	https://www.genome.jp/kegg-bin/show_pathway?mmu00053/mmu:C01041%09red/mmu:C02670%09red
mmu04921	Oxytocin signaling pathway	1	45	12	3244	0.0833333	0.154573	0.810867	0.323198	C00219	https://www.genome.jp/kegg-bin/show_pathway?mmu04921/mmu:C00219%09red
mmu04927	Cortisol synthesis and secretion	1	45	12	3244	0.0833333	0.154573	0.810867	0.323198	C00020	https://www.genome.jp/kegg-bin/show_pathway?mmu04927/mmu:C00020%09blue
mmu04270	Vascular smooth muscle contraction	1	45	13	3244	0.0769231	0.166344	0.778993	0.327935	C00219	https://www.genome.jp/kegg-bin/show_pathway?mmu04270/mmu:C00219%09red
mmu04934	Cushing syndrome	1	45	13	3244	0.0769231	0.166344	0.778993	0.327935	C00020	https://www.genome.jp/kegg-bin/show_pathway?mmu04934/mmu:C00020%09blue
mmu00051	Fructose and mannose metabolism	2	45	54	3244	0.037037	0.171596	0.765493	0.328892	C00267 C01487	https://www.genome.jp/kegg-bin/show_pathway?mmu00051/mmu:C00267%09blue/mmu:C01487%09blue
mmu04611	Platelet activation	1	45	14	3244	0.0714286	0.177955	0.74969	0.331862	C00219	https://www.genome.jp/kegg-bin/show_pathway?mmu04611/mmu:C00219%09red
mmu00520	Amino sugar and nucleotide sugar metabolism	3	45	108	3244	0.0277778	0.187555	0.726871	0.340561	C00267 C00984 C02336	https://www.genome.jp/kegg-bin/show_pathway?mmu00520/mmu:C00267%09blue/mmu:C00984%09blue/mmu:C02336%09blue
mmu04924	Renin secretion	1	45	17	3244	0.0588235	0.211847	0.673978	0.365436	C00020	https://www.genome.jp/kegg-bin/show_pathway?mmu04924/mmu:C00020%09blue
mmu04964	Proximal tubule bicarbonate reclamation	1	45	17	3244	0.0588235	0.211847	0.673978	0.365436	C00267	https://www.genome.jp/kegg-bin/show_pathway?mmu04964/mmu:C00267%09blue
mmu04723	Retrograde endocannabinoid signaling	1	45	19	3244	0.0526316	0.233678	0.631382	0.383218	C00219	https://www.genome.jp/kegg-bin/show_pathway?mmu04723/mmu:C00219%09red
mmu04913	Ovarian steroidogenesis	1	45	20	3244	0.05	0.244371	0.61195	0.383218	C00219	https://www.genome.jp/kegg-bin/show_pathway?mmu04913/mmu:C00219%09red
mmu04931	Insulin resistance	1	45	20	3244	0.05	0.244371	0.61195	0.383218	C02571	https://www.genome.jp/kegg-bin/show_pathway?mmu04931/mmu:C02571%09blue
mmu05012	Parkinson disease	1	45	20	3244	0.05	0.244371	0.61195	0.383218	C00020	https://www.genome.jp/kegg-bin/show_pathway?mmu05012/mmu:C00020%09blue
mmu00430	Taurine and hypotaurine metabolism	1	45	22	3244	0.0454545	0.265321	0.576229	0.396149	C00245	https://www.genome.jp/kegg-bin/show_pathway?mmu00430/mmu:C00245%09red
mmu04152	AMPK signaling pathway	1	45	22	3244	0.0454545	0.265321	0.576229	0.396149	C00020	https://www.genome.jp/kegg-bin/show_pathway?mmu04152/mmu:C00020%09blue
mmu00290	Valine, leucine and isoleucine biosynthesis	1	45	23	3244	0.0434783	0.275582	0.55975	0.396149	C00183	https://www.genome.jp/kegg-bin/show_pathway?mmu00290/mmu:C00183%09blue
mmu04714	Thermogenesis	1	45	23	3244	0.0434783	0.275582	0.55975	0.396149	C00318	https://www.genome.jp/kegg-bin/show_pathway?mmu04714/mmu:C00318%09blue
mmu00830	Retinol metabolism	1	45	24	3244	0.0416667	0.285702	0.544086	0.400044	C02075	https://www.genome.jp/kegg-bin/show_pathway?mmu00830/mmu:C02075%09red
mmu04024	cAMP signaling pathway	1	45	25	3244	0.04	0.295685	0.529171	0.400044	C00020	https://www.genome.jp/kegg-bin/show_pathway?mmu04024/mmu:C00020%09blue
mmu04742	Taste transduction	1	45	25	3244	0.04	0.295685	0.529171	0.400044	C00020	https://www.genome.jp/kegg-bin/show_pathway?mmu04742/mmu:C00020%09blue
mmu04216	Ferroptosis	1	45	27	3244	0.037037	0.315242	0.501356	0.415049	C00219	https://www.genome.jp/kegg-bin/show_pathway?mmu04216/mmu:C00219%09red
mmu01523	Antifolate resistance	1	45	28	3244	0.0357143	0.324821	0.488356	0.415049	C00020	https://www.genome.jp/kegg-bin/show_pathway?mmu01523/mmu:C00020%09blue
mmu04750	Inflammatory mediator regulation of TRP channels	1	45	28	3244	0.0357143	0.324821	0.488356	0.415049	C00219	https://www.genome.jp/kegg-bin/show_pathway?mmu04750/mmu:C00219%09red
mmu00410	beta-Alanine metabolism	1	45	32	3244	0.03125	0.361842	0.441481	0.453947	C03492	https://www.genome.jp/kegg-bin/show_pathway?mmu00410/mmu:C03492%09blue
mmu00920	Sulfur metabolism	1	45	33	3244	0.030303	0.370782	0.430881	0.456857	C00245	https://www.genome.jp/kegg-bin/show_pathway?mmu00920/mmu:C00245%09red
mmu00030	Pentose phosphate pathway	1	45	35	3244	0.0285714	0.388298	0.410835	0.470044	C00221	https://www.genome.jp/kegg-bin/show_pathway?mmu00030/mmu:C00221%09blue
mmu04977	Vitamin digestion and absorption	1	45	37	3244	0.027027	0.405336	0.392185	0.48221	C02075	https://www.genome.jp/kegg-bin/show_pathway?mmu04977/mmu:C02075%09red
mmu00062	Fatty acid elongation	1	45	38	3244	0.0263158	0.41368	0.383335	0.483795	C00249	https://www.genome.jp/kegg-bin/show_pathway?mmu00062/mmu:C00249%09blue
mmu00280	Valine, leucine and isoleucine degradation	1	45	41	3244	0.0243902	0.438032	0.358495	0.503736	C00183	https://www.genome.jp/kegg-bin/show_pathway?mmu00280/mmu:C00183%09blue
mmu00592	alpha-Linolenic acid metabolism	1	45	44	3244	0.0227273	0.461393	0.335929	0.521904	C06427	https://www.genome.jp/kegg-bin/show_pathway?mmu00592/mmu:C06427%09red
mmu00120	Primary bile acid biosynthesis	1	45	47	3244	0.0212766	0.483805	0.31533	0.534644	C00245	https://www.genome.jp/kegg-bin/show_pathway?mmu00120/mmu:C00245%09red
mmu00071	Fatty acid degradation	1	45	50	3244	0.02	0.505303	0.296448	0.534644	C00249	https://www.genome.jp/kegg-bin/show_pathway?mmu00071/mmu:C00249%09blue
mmu00260	Glycine, serine and threonine metabolism	1	45	50	3244	0.02	0.505303	0.296448	0.534644	C02737	https://www.genome.jp/kegg-bin/show_pathway?mmu00260/mmu:C02737%09blue
mmu00310	Lysine degradation	1	45	50	3244	0.02	0.505303	0.296448	0.534644	C00431	https://www.genome.jp/kegg-bin/show_pathway?mmu00310/mmu:C00431%09blue
mmu00564	Glycerophospholipid metabolism	1	45	52	3244	0.0192308	0.519147	0.28471	0.534644	C02737	https://www.genome.jp/kegg-bin/show_pathway?mmu00564/mmu:C02737%09blue
mmu00970	Aminoacyl-tRNA biosynthesis	1	45	52	3244	0.0192308	0.519147	0.28471	0.534644	C00183	https://www.genome.jp/kegg-bin/show_pathway?mmu00970/mmu:C00183%09blue
mmu00330	Arginine and proline metabolism	1	45	78	3244	0.0128205	0.668062	0.175183	0.677886	C00431	https://www.genome.jp/kegg-bin/show_pathway?mmu00330/mmu:C00431%09blue
mmu00380	Tryptophan metabolism	1	45	83	3244	0.0120482	0.691005	0.160519	0.691005	C05658	https://www.genome.jp/kegg-bin/show_pathway?mmu00380/mmu:C05658%09blue
