# Supplementary material for: Spatial Resolved Metabolomics via AFADESI-MSI Reveals Lipid Metabolic Alterations in Aging Lungs
Source: Research Square preprint supplement (doi:10.21203/rs.3.rs-7113832/v1), 2025-07-28
Supplement: Supplementary file 4 [file 8ae218e6c272767db756baa1.xlsx]

## Sheet: table S2
				Table S2. Significant expressed metabolites of AFADESI-MSI
ID	ID-num	HMDB	Metabolites	Super Class	Class	Sub Class	KEGG	Formula	Adduct	mz	moc	spec	spat	msm	VIP	P-value	adj.P-value	log2(FC)	FC	average(24m)	average(3m)	mode
64	64-1	HMDB0000673	Linoleic acid	Lipids and lipid-like molecules	Fatty Acyls	Lineolic acids and derivatives	C01595	C18H32O2	-H	279.233	0.996911	0.916699	0.992945	0.907421	9.30159	4.34621e-39	3.29504e-38	0.689828	1.61309	583511	361735	neg
64	64-10	HMDB0062784	Octadecadienoate	Lipids and lipid-like molecules	Fatty Acyls	Lineolic acids and derivatives		C18H32O2	-H	279.233	0.996911	0.916699	0.992945	0.907421	9.30159	4.34621e-39	3.29504e-38	0.689828	1.61309	583511	361735	neg
64	64-2	HMDB0003797	Bovinic acid	Lipids and lipid-like molecules	Fatty Acyls	Lineolic acids and derivatives	C04056	C18H32O2	-H	279.233	0.996911	0.916699	0.992945	0.907421	9.30159	4.34621e-39	3.29504e-38	0.689828	1.61309	583511	361735	neg
64	64-3	HMDB0005047	(9E,11E)-Octadecadienoic acid	Lipids and lipid-like molecules	Fatty Acyls	Lineolic acids and derivatives		C18H32O2	-H	279.233	0.996911	0.916699	0.992945	0.907421	9.30159	4.34621e-39	3.29504e-38	0.689828	1.61309	583511	361735	neg
64	64-4	HMDB0006270	Linoelaidic acid	Lipids and lipid-like molecules	Fatty Acyls	Lineolic acids and derivatives		C18H32O2	-H	279.233	0.996911	0.916699	0.992945	0.907421	9.30159	4.34621e-39	3.29504e-38	0.689828	1.61309	583511	361735	neg
64	64-5	HMDB0029800	Mangiferic acid	Lipids and lipid-like molecules	Fatty Acyls	Lineolic acids and derivatives		C18H32O2	-H	279.233	0.996911	0.916699	0.992945	0.907421	9.30159	4.34621e-39	3.29504e-38	0.689828	1.61309	583511	361735	neg
64	64-6	HMDB0030430	Linalyl caprylate	Lipids and lipid-like molecules	Prenol lipids	Monoterpenoids		C18H32O2	-H	279.233	0.996911	0.916699	0.992945	0.907421	9.30159	4.34621e-39	3.29504e-38	0.689828	1.61309	583511	361735	neg
64	64-7	HMDB0031051	Ethyl 2E,4Z-hexadecadienoate	Lipids and lipid-like molecules	Fatty Acyls	Fatty acid esters		C18H32O2	-H	279.233	0.996911	0.916699	0.992945	0.907421	9.30159	4.34621e-39	3.29504e-38	0.689828	1.61309	583511	361735	neg
64	64-8	HMDB0031097	5-Octadecynoic acid	Lipids and lipid-like molecules	Fatty Acyls	Fatty acids and conjugates		C18H32O2	-H	279.233	0.996911	0.916699	0.992945	0.907421	9.30159	4.34621e-39	3.29504e-38	0.689828	1.61309	583511	361735	neg
64	64-9	HMDB0062238	6Z,9Z-octadecadienoic acid	Lipids and lipid-like molecules	Fatty Acyls	Lineolic acids and derivatives		C18H32O2	-H	279.233	0.996911	0.916699	0.992945	0.907421	9.30159	4.34621e-39	3.29504e-38	0.689828	1.61309	583511	361735	neg
65	65-1	HMDB0000207	Oleic acid	Lipids and lipid-like molecules	Fatty Acyls	Fatty acids and conjugates	C00712	C18H34O2	-H	281.249	0.997235	0.980947	0.996227	0.974544	7.38836	2.4196e-33	1.54665e-32	0.638842	1.55708	423923	272255	neg
65	65-2	HMDB0000573	Elaidic acid	Lipids and lipid-like molecules	Fatty Acyls	Fatty acids and conjugates	C01712	C18H34O2	-H	281.249	0.997235	0.980947	0.996227	0.974544	7.38836	2.4196e-33	1.54665e-32	0.638842	1.55708	423923	272255	neg
65	65-3	HMDB0003231	Vaccenic acid	Lipids and lipid-like molecules	Fatty Acyls	Fatty acids and conjugates	C08367	C18H34O2	-H	281.249	0.997235	0.980947	0.996227	0.974544	7.38836	2.4196e-33	1.54665e-32	0.638842	1.55708	423923	272255	neg
65	65-4	HMDB0041480	(Z)-13-Octadecenoic acid	Lipids and lipid-like molecules	Fatty Acyls	Fatty acids and conjugates		C18H34O2	-H	281.249	0.997235	0.980947	0.996227	0.974544	7.38836	2.4196e-33	1.54665e-32	0.638842	1.55708	423923	272255	neg
65	65-5	HMDB0059871	Ethyl 9-hexadecenoate	Lipids and lipid-like molecules	Fatty Acyls	Fatty acid esters		C18H34O2	-H	281.249	0.997235	0.980947	0.996227	0.974544	7.38836	2.4196e-33	1.54665e-32	0.638842	1.55708	423923	272255	neg
65	65-6	HMDB0062242	7Z-octadecenoic acid	Lipids and lipid-like molecules	Fatty Acyls	Fatty acids and conjugates		C18H34O2	-H	281.249	0.997235	0.980947	0.996227	0.974544	7.38836	2.4196e-33	1.54665e-32	0.638842	1.55708	423923	272255	neg
65	65-7	HMDB0062703	Octadec-9-enoic Acid	Lipids and lipid-like molecules	Fatty Acyls	Fatty acids and conjugates		C18H34O2	-H	281.249	0.997235	0.980947	0.996227	0.974544	7.38836	2.4196e-33	1.54665e-32	0.638842	1.55708	423923	272255	neg
46	46-1	HMDB0002186	Hypogeic acid	Lipids and lipid-like molecules	Fatty Acyls	Fatty acids and conjugates		C16H30O2	-H	253.217	0.997306	0.952397	0.998617	0.948518	5.55541	2.18265e-57	7.11543e-56	1.02282	2.03188	119095	58613.3	neg
46	46-10	HMDB0035877	(Z)-13-Hexadecenoic acid	Lipids and lipid-like molecules	Fatty Acyls	Fatty acids and conjugates		C16H30O2	-H	253.217	0.997306	0.952397	0.998617	0.948518	5.55541	2.18265e-57	7.11543e-56	1.02282	2.03188	119095	58613.3	neg
46	46-11	HMDB0037647	(E)-11-Hexadecenoic acid	Lipids and lipid-like molecules	Fatty Acyls	Fatty acids and conjugates		C16H30O2	-H	253.217	0.997306	0.952397	0.998617	0.948518	5.55541	2.18265e-57	7.11543e-56	1.02282	2.03188	119095	58613.3	neg
46	46-12	HMDB0038958	Citronellyl hexanoate	Lipids and lipid-like molecules	Fatty Acyls	Fatty alcohol esters		C16H30O2	-H	253.217	0.997306	0.952397	0.998617	0.948518	5.55541	2.18265e-57	7.11543e-56	1.02282	2.03188	119095	58613.3	neg
46	46-13	HMDB0041422	(Z)-14-Methyl-6-pentadecenoic acid	Lipids and lipid-like molecules	Fatty Acyls	Fatty acids and conjugates		C16H30O2	-H	253.217	0.997306	0.952397	0.998617	0.948518	5.55541	2.18265e-57	7.11543e-56	1.02282	2.03188	119095	58613.3	neg
46	46-2	HMDB0003229	Palmitoleic acid	Lipids and lipid-like molecules	Fatty Acyls	Fatty acids and conjugates	C08362	C16H30O2	-H	253.217	0.997306	0.952397	0.998617	0.948518	5.55541	2.18265e-57	7.11543e-56	1.02282	2.03188	119095	58613.3	neg
46	46-3	HMDB0010735	Trans-Hexa-dec-2-enoic acid	Lipids and lipid-like molecules	Fatty Acyls	Fatty acids and conjugates		C16H30O2	-H	253.217	0.997306	0.952397	0.998617	0.948518	5.55541	2.18265e-57	7.11543e-56	1.02282	2.03188	119095	58613.3	neg
46	46-4	HMDB0012328	Palmitelaidic acid	Lipids and lipid-like molecules	Fatty Acyls	Fatty acids and conjugates		C16H30O2	-H	253.217	0.997306	0.952397	0.998617	0.948518	5.55541	2.18265e-57	7.11543e-56	1.02282	2.03188	119095	58613.3	neg
46	46-5	HMDB0031053	(E)-6-Hexadecenoic acid	Lipids and lipid-like molecules	Fatty Acyls	Fatty acids and conjugates		C16H30O2	-H	253.217	0.997306	0.952397	0.998617	0.948518	5.55541	2.18265e-57	7.11543e-56	1.02282	2.03188	119095	58613.3	neg
46	46-6	HMDB0031145	5-Dodecyldihydro-2(3H)-furanone	Organoheterocyclic compounds	Lactones	Gamma butyrolactones		C16H30O2	-H	253.217	0.997306	0.952397	0.998617	0.948518	5.55541	2.18265e-57	7.11543e-56	1.02282	2.03188	119095	58613.3	neg
46	46-7	HMDB0031711	15-Hexadecanolide	Phenylpropanoids and polyketides	Macrolides and analogues			C16H30O2	-H	253.217	0.997306	0.952397	0.998617	0.948518	5.55541	2.18265e-57	7.11543e-56	1.02282	2.03188	119095	58613.3	neg
46	46-8	HMDB0032638	(Z)-5-Hexadecenoic acid	Lipids and lipid-like molecules	Fatty Acyls	Fatty acids and conjugates		C16H30O2	-H	253.217	0.997306	0.952397	0.998617	0.948518	5.55541	2.18265e-57	7.11543e-56	1.02282	2.03188	119095	58613.3	neg
46	46-9	HMDB0033791	(E)-3-Hexadecenoic acid	Lipids and lipid-like molecules	Fatty Acyls	Fatty acids and conjugates		C16H30O2	-H	253.217	0.997306	0.952397	0.998617	0.948518	5.55541	2.18265e-57	7.11543e-56	1.02282	2.03188	119095	58613.3	neg
47	47-1	HMDB0000220	Palmitic acid	Lipids and lipid-like molecules	Fatty Acyls	Fatty acids and conjugates	C00249	C16H32O2	-H	255.233	0.997232	0.99301	0.997654	0.987938	4.44718	6.06652e-17	1.59491e-16	0.27908	1.21342	450444	371218	neg
47	47-2	HMDB0002396	Trimethyltridecanoic acid	Lipids and lipid-like molecules	Prenol lipids	Sesquiterpenoids		C16H32O2	-H	255.233	0.997232	0.99301	0.997654	0.987938	4.44718	6.06652e-17	1.59491e-16	0.27908	1.21342	450444	371218	neg
47	47-3	HMDB0031068	Isopalmitic acid	Lipids and lipid-like molecules	Fatty Acyls	Fatty acids and conjugates		C16H32O2	-H	255.233	0.997232	0.99301	0.997654	0.987938	4.44718	6.06652e-17	1.59491e-16	0.27908	1.21342	450444	371218	neg
47	47-4	HMDB0032065	Butyl dodecanoate	Lipids and lipid-like molecules	Fatty Acyls	Fatty acid esters		C16H32O2	-H	255.233	0.997232	0.99301	0.997654	0.987938	4.44718	6.06652e-17	1.59491e-16	0.27908	1.21342	450444	371218	neg
47	47-5	HMDB0032249	Dodecyl butyrate	Lipids and lipid-like molecules	Fatty Acyls	Fatty alcohol esters		C16H32O2	-H	255.233	0.997232	0.99301	0.997654	0.987938	4.44718	6.06652e-17	1.59491e-16	0.27908	1.21342	450444	371218	neg
47	47-6	HMDB0032324	Hexyl decanoate	Lipids and lipid-like molecules	Fatty Acyls	Fatty acid esters		C16H32O2	-H	255.233	0.997232	0.99301	0.997654	0.987938	4.44718	6.06652e-17	1.59491e-16	0.27908	1.21342	450444	371218	neg
47	47-7	HMDB0033166	Octyl octanoate	Lipids and lipid-like molecules	Fatty Acyls	Fatty alcohol esters		C16H32O2	-H	255.233	0.997232	0.99301	0.997654	0.987938	4.44718	6.06652e-17	1.59491e-16	0.27908	1.21342	450444	371218	neg
47	47-8	HMDB0034153	Ethyl tetradecanoate	Lipids and lipid-like molecules	Fatty Acyls	Fatty acid esters		C16H32O2	-H	255.233	0.997232	0.99301	0.997654	0.987938	4.44718	6.06652e-17	1.59491e-16	0.27908	1.21342	450444	371218	neg
47	47-9	HMDB0036210	Dodecyl 2-methylpropanoate	Lipids and lipid-like molecules	Fatty Acyls	Fatty alcohol esters		C16H32O2	-H	255.233	0.997232	0.99301	0.997654	0.987938	4.44718	6.06652e-17	1.59491e-16	0.27908	1.21342	450444	371218	neg
83	83-1	HMDB0001999	Eicosapentaenoic acid	Lipids and lipid-like molecules	Fatty Acyls	Fatty acids and conjugates	C06428	C20H30O2	-H	301.217	0.996571	0.899922	0.991113	0.888865	3.85457	1.86761e-44	1.964e-43	0.605982	1.52201	101628	66772	neg
83	83-10	HMDB0038172	8,13-Abietadien-18-oic acid	Lipids and lipid-like molecules	Prenol lipids	Diterpenoids	C12077	C20H30O2	-H	301.217	0.996571	0.899922	0.991113	0.888865	3.85457	1.86761e-44	1.964e-43	0.605982	1.52201	101628	66772	neg
83	83-11	HMDB0038687	(ent-15beta,16beta)-15,16-Epoxy-3-kauranone	Lipids and lipid-like molecules	Prenol lipids	Diterpenoids		C20H30O2	-H	301.217	0.996571	0.899922	0.991113	0.888865	3.85457	1.86761e-44	1.964e-43	0.605982	1.52201	101628	66772	neg
83	83-12	HMDB0039486	ent-8(17),13(16),14-Labdatrien-18-oic acid	Lipids and lipid-like molecules	Prenol lipids	Diterpenoids		C20H30O2	-H	301.217	0.996571	0.899922	0.991113	0.888865	3.85457	1.86761e-44	1.964e-43	0.605982	1.52201	101628	66772	neg
83	83-2	HMDB0003598	Retinyl ester	Lipids and lipid-like molecules	Prenol lipids	Retinoids	C02075	C20H30O2	-H	301.217	0.996571	0.899922	0.991113	0.888865	3.85457	1.86761e-44	1.964e-43	0.605982	1.52201	101628	66772	neg
83	83-3	HMDB0035692	8,15-Isopimaradien-18-oic acid	Lipids and lipid-like molecules	Prenol lipids	Diterpenoids		C20H30O2	-H	301.217	0.996571	0.899922	0.991113	0.888865	3.85457	1.86761e-44	1.964e-43	0.605982	1.52201	101628	66772	neg
83	83-4	HMDB0036703	Siderone	Lipids and lipid-like molecules	Prenol lipids	Diterpenoids		C20H30O2	-H	301.217	0.996571	0.899922	0.991113	0.888865	3.85457	1.86761e-44	1.964e-43	0.605982	1.52201	101628	66772	neg
83	83-5	HMDB0036709	Yucalexin B14	Lipids and lipid-like molecules	Prenol lipids	Diterpenoids		C20H30O2	-H	301.217	0.996571	0.899922	0.991113	0.888865	3.85457	1.86761e-44	1.964e-43	0.605982	1.52201	101628	66772	neg
83	83-6	HMDB0036775	Yucalexin A16	Lipids and lipid-like molecules	Prenol lipids	Diterpenoids		C20H30O2	-H	301.217	0.996571	0.899922	0.991113	0.888865	3.85457	1.86761e-44	1.964e-43	0.605982	1.52201	101628	66772	neg
83	83-7	HMDB0036805	8(17),12-Labdadiene-15,16-dial	Lipids and lipid-like molecules	Prenol lipids	Diterpenoids		C20H30O2	-H	301.217	0.996571	0.899922	0.991113	0.888865	3.85457	1.86761e-44	1.964e-43	0.605982	1.52201	101628	66772	neg
83	83-8	HMDB0036811	Isopimaric acid	Lipids and lipid-like molecules	Prenol lipids	Diterpenoids	C09118	C20H30O2	-H	301.217	0.996571	0.899922	0.991113	0.888865	3.85457	1.86761e-44	1.964e-43	0.605982	1.52201	101628	66772	neg
83	83-9	HMDB0036826	Cascarillone	Lipids and lipid-like molecules	Prenol lipids	Diterpenoids		C20H30O2	-H	301.217	0.996571	0.899922	0.991113	0.888865	3.85457	1.86761e-44	1.964e-43	0.605982	1.52201	101628	66772	neg
84	84-1	HMDB0001043	Arachidonic acid	Lipids and lipid-like molecules	Fatty Acyls	Fatty acids and conjugates	C00219	C20H32O2	-H	303.233	0.996357	0.968632	0.994078	0.959388	3.2493	5.68575e-22	2.10631e-21	0.439845	1.35646	135202	99672.8	neg
84	84-10	HMDB0039687	Oryzalexin S	Lipids and lipid-like molecules	Prenol lipids	Diterpenoids		C20H32O2	-H	303.233	0.996357	0.968632	0.994078	0.959388	3.2493	5.68575e-22	2.10631e-21	0.439845	1.35646	135202	99672.8	neg
84	84-11	HMDB0039702	Oryzalexin E	Benzenoids	Phenanthrenes and derivatives	Hydrophenanthrenes		C20H32O2	-H	303.233	0.996357	0.968632	0.994078	0.959388	3.2493	5.68575e-22	2.10631e-21	0.439845	1.35646	135202	99672.8	neg
84	84-2	HMDB0002177	Cis-8,11,14,17-Eicosatetraenoic acid	Lipids and lipid-like molecules	Fatty Acyls	Fatty acids and conjugates		C20H32O2	-H	303.233	0.996357	0.968632	0.994078	0.959388	3.2493	5.68575e-22	2.10631e-21	0.439845	1.35646	135202	99672.8	neg
84	84-3	HMDB0006036	Mesterolone	Lipids and lipid-like molecules	Steroids and steroid derivatives	Androstane steroids	D04947	C20H32O2	-H	303.233	0.996357	0.968632	0.994078	0.959388	3.2493	5.68575e-22	2.10631e-21	0.439845	1.35646	135202	99672.8	neg
84	84-4	HMDB0036702	Sideridiol	Lipids and lipid-like molecules	Prenol lipids	Diterpenoids		C20H32O2	-H	303.233	0.996357	0.968632	0.994078	0.959388	3.2493	5.68575e-22	2.10631e-21	0.439845	1.35646	135202	99672.8	neg
84	84-5	HMDB0036721	ent-17-Hydroxy-16beta-kauran-19-al	Lipids and lipid-like molecules	Prenol lipids	Diterpenoids		C20H32O2	-H	303.233	0.996357	0.968632	0.994078	0.959388	3.2493	5.68575e-22	2.10631e-21	0.439845	1.35646	135202	99672.8	neg
84	84-6	HMDB0036754	Yucalexin P21	Lipids and lipid-like molecules	Prenol lipids	Diterpenoids		C20H32O2	-H	303.233	0.996357	0.968632	0.994078	0.959388	3.2493	5.68575e-22	2.10631e-21	0.439845	1.35646	135202	99672.8	neg
84	84-7	HMDB0036829	Copalic acid	Lipids and lipid-like molecules	Prenol lipids	Diterpenoids		C20H32O2	-H	303.233	0.996357	0.968632	0.994078	0.959388	3.2493	5.68575e-22	2.10631e-21	0.439845	1.35646	135202	99672.8	neg
84	84-8	HMDB0036830	Junicedral	Lipids and lipid-like molecules	Prenol lipids	Diterpenoids		C20H32O2	-H	303.233	0.996357	0.968632	0.994078	0.959388	3.2493	5.68575e-22	2.10631e-21	0.439845	1.35646	135202	99672.8	neg
84	84-9	HMDB0037824	7,13-Eperudien-15-oic acid	Lipids and lipid-like molecules	Prenol lipids	Diterpenoids		C20H32O2	-H	303.233	0.996357	0.968632	0.994078	0.959388	3.2493	5.68575e-22	2.10631e-21	0.439845	1.35646	135202	99672.8	neg
63	63-1	HMDB0001388	alpha-Linolenic acid	Lipids and lipid-like molecules	Fatty Acyls	Lineolic acids and derivatives	C06427	C18H30O2	-H	277.217	0.996693	0.958421	0.992633	0.948214	2.30146	1.50146e-19	4.57454e-19	0.40453	1.32366	78261.9	59125.5	neg
63	63-2	HMDB0003073	gamma-Linolenic acid	Lipids and lipid-like molecules	Fatty Acyls	Lineolic acids and derivatives	C06426	C18H30O2	-H	277.217	0.996693	0.958421	0.992633	0.948214	2.30146	1.50146e-19	4.57454e-19	0.40453	1.32366	78261.9	59125.5	neg
63	63-3	HMDB0030962	Calendic acid	Lipids and lipid-like molecules	Fatty Acyls	Lineolic acids and derivatives		C18H30O2	-H	277.217	0.996693	0.958421	0.992633	0.948214	2.30146	1.50146e-19	4.57454e-19	0.40453	1.32366	78261.9	59125.5	neg
63	63-4	HMDB0030963	Punicic acid	Lipids and lipid-like molecules	Fatty Acyls	Lineolic acids and derivatives		C18H30O2	-H	277.217	0.996693	0.958421	0.992633	0.948214	2.30146	1.50146e-19	4.57454e-19	0.40453	1.32366	78261.9	59125.5	neg
63	63-5	HMDB0030964	Linolenelaidic acid	Lipids and lipid-like molecules	Fatty Acyls	Lineolic acids and derivatives		C18H30O2	-H	277.217	0.996693	0.958421	0.992633	0.948214	2.30146	1.50146e-19	4.57454e-19	0.40453	1.32366	78261.9	59125.5	neg
118	118-1	HMDB0002183	Docosahexaenoic acid	Lipids and lipid-like molecules	Fatty Acyls	Fatty acids and conjugates	C06429	C22H32O2	-H	327.233	0.99629	0.973246	0.998682	0.968358	2.28848	9.30242e-12	2.02173e-11	0.300413	1.2315	134855	109505	neg
118	118-2	HMDB0030053	Neogrifolin	Lipids and lipid-like molecules	Prenol lipids	Sesquiterpenoids		C22H32O2	-H	327.233	0.99629	0.973246	0.998682	0.968358	2.28848	9.30242e-12	2.02173e-11	0.300413	1.2315	134855	109505	neg
118	118-3	HMDB0030446	Grifolin	Lipids and lipid-like molecules	Prenol lipids	Sesquiterpenoids		C22H32O2	-H	327.233	0.99629	0.973246	0.998682	0.968358	2.28848	9.30242e-12	2.02173e-11	0.300413	1.2315	134855	109505	neg
118	118-4	HMDB0035185	Retinol acetate	Lipids and lipid-like molecules	Prenol lipids	Retinoids		C22H32O2	-H	327.233	0.99629	0.973246	0.998682	0.968358	2.28848	9.30242e-12	2.02173e-11	0.300413	1.2315	134855	109505	neg
117	117-1	HMDB0002925	Dihomo-gamma-linolenic acid	Lipids and lipid-like molecules	Fatty Acyls	Fatty acids and conjugates	C03242	C20H34O2	+Na-2H	327.231	0.996262	0.966882	0.998209	0.961543	2.03647	8.18191e-12	1.79014e-11	0.30602	1.23629	107222	86728.6	neg
117	117-2	HMDB0010378	5,8,11-Eicosatrienoic acid	Lipids and lipid-like molecules	Fatty Acyls	Fatty acids and conjugates		C20H34O2	+Na-2H	327.231	0.996262	0.966882	0.998209	0.961543	2.03647	8.18191e-12	1.79014e-11	0.30602	1.23629	107222	86728.6	neg
117	117-3	HMDB0031058	Sciadonic acid	Lipids and lipid-like molecules	Fatty Acyls	Fatty acids and conjugates		C20H34O2	+Na-2H	327.231	0.996262	0.966882	0.998209	0.961543	2.03647	8.18191e-12	1.79014e-11	0.30602	1.23629	107222	86728.6	neg
117	117-4	HMDB0036835	Sagittariol	Lipids and lipid-like molecules	Prenol lipids	Diterpenoids		C20H34O2	+Na-2H	327.231	0.996262	0.966882	0.998209	0.961543	2.03647	8.18191e-12	1.79014e-11	0.30602	1.23629	107222	86728.6	neg
117	117-5	HMDB0060039	Dihomo-alpha-linolenic acid	Lipids and lipid-like molecules	Fatty Acyls	Fatty acids and conjugates	C16522	C20H34O2	+Na-2H	327.231	0.996262	0.966882	0.998209	0.961543	2.03647	8.18191e-12	1.79014e-11	0.30602	1.23629	107222	86728.6	neg
32	32-1	HMDB0000806	Myristic acid	Lipids and lipid-like molecules	Fatty Acyls	Fatty acids and conjugates	C06424	C14H28O2	-H	227.202	0.997495	0.887614	0.996283	0.882099	1.90767	3.15945e-34	2.05996e-33	0.510075	1.42412	30706.5	21561.7	neg
32	32-10	HMDB0037495	3-Methylbutyl nonanoate	Lipids and lipid-like molecules	Fatty Acyls	Fatty acid esters		C14H28O2	-H	227.202	0.997495	0.887614	0.996283	0.882099	1.90767	3.15945e-34	2.05996e-33	0.510075	1.42412	30706.5	21561.7	neg
32	32-11	HMDB0038034	Nonyl isovalerate	Lipids and lipid-like molecules	Fatty Acyls	Fatty alcohol esters		C14H28O2	-H	227.202	0.997495	0.887614	0.996283	0.882099	1.90767	3.15945e-34	2.05996e-33	0.510075	1.42412	30706.5	21561.7	neg
32	32-12	HMDB0038969	Dodecyl acetate	Lipids and lipid-like molecules	Fatty Acyls	Fatty alcohol esters		C14H28O2	-H	227.202	0.997495	0.887614	0.996283	0.882099	1.90767	3.15945e-34	2.05996e-33	0.510075	1.42412	30706.5	21561.7	neg
32	32-13	HMDB0059865	Isobutyl decanoate	Lipids and lipid-like molecules	Fatty Acyls	Fatty acid esters		C14H28O2	-H	227.202	0.997495	0.887614	0.996283	0.882099	1.90767	3.15945e-34	2.05996e-33	0.510075	1.42412	30706.5	21561.7	neg
32	32-14	HMDB0061781	10-Methyltridecanoic acid	Lipids and lipid-like molecules	Fatty Acyls	Fatty acids and conjugates		C14H28O2	-H	227.202	0.997495	0.887614	0.996283	0.882099	1.90767	3.15945e-34	2.05996e-33	0.510075	1.42412	30706.5	21561.7	neg
32	32-2	HMDB0002221	2,6,10-Trimethylundecanoic acid	Lipids and lipid-like molecules	Fatty Acyls	Fatty acids and conjugates		C14H28O2	-H	227.202	0.997495	0.887614	0.996283	0.882099	1.90767	3.15945e-34	2.05996e-33	0.510075	1.42412	30706.5	21561.7	neg
32	32-3	HMDB0031072	12-Methyltridecanoic acid	Lipids and lipid-like molecules	Fatty Acyls	Fatty acids and conjugates		C14H28O2	-H	227.202	0.997495	0.887614	0.996283	0.882099	1.90767	3.15945e-34	2.05996e-33	0.510075	1.42412	30706.5	21561.7	neg
32	32-4	HMDB0032318	Hexanal octane-1,3-diol acetal	Organoheterocyclic compounds	Dioxanes	1,3-dioxanes		C14H28O2	-H	227.202	0.997495	0.887614	0.996283	0.882099	1.90767	3.15945e-34	2.05996e-33	0.510075	1.42412	30706.5	21561.7	neg
32	32-5	HMDB0032548	Undecanal propyleneglycol acetal	Organoheterocyclic compounds	Dioxolanes	1,3-dioxolanes		C14H28O2	-H	227.202	0.997495	0.887614	0.996283	0.882099	1.90767	3.15945e-34	2.05996e-33	0.510075	1.42412	30706.5	21561.7	neg
32	32-6	HMDB0033788	Ethyl dodecanoate	Lipids and lipid-like molecules	Fatty Acyls	Fatty acid esters		C14H28O2	-H	227.202	0.997495	0.887614	0.996283	0.882099	1.90767	3.15945e-34	2.05996e-33	0.510075	1.42412	30706.5	21561.7	neg
32	32-7	HMDB0034461	Heptyl heptanoate	Lipids and lipid-like molecules	Fatty Acyls	Fatty acid esters		C14H28O2	-H	227.202	0.997495	0.887614	0.996283	0.882099	1.90767	3.15945e-34	2.05996e-33	0.510075	1.42412	30706.5	21561.7	neg
32	32-8	HMDB0036216	Hexyl octanoate	Lipids and lipid-like molecules	Fatty Acyls	Fatty acid esters	C13798	C14H28O2	-H	227.202	0.997495	0.887614	0.996283	0.882099	1.90767	3.15945e-34	2.05996e-33	0.510075	1.42412	30706.5	21561.7	neg
32	32-9	HMDB0037312	Decyl butanoate	Lipids and lipid-like molecules	Fatty Acyls	Fatty alcohol esters		C14H28O2	-H	227.202	0.997495	0.887614	0.996283	0.882099	1.90767	3.15945e-34	2.05996e-33	0.510075	1.42412	30706.5	21561.7	neg
132	132-1	HMDB0029620	Tricetin	Phenylpropanoids and polyketides	Flavonoids	Flavones	C10192	C15H10O7	+HCOO	347.041	0.998504	0.629674	0.957825	0.602215	1.69417	3.1196e-159	5.08494e-157	2.33171	5.03402	5092.47	1011.61	neg
132	132-2	HMDB0030796	Morin	Phenylpropanoids and polyketides	Flavonoids	Flavones	C10105	C15H10O7	+HCOO	347.041	0.998504	0.629674	0.957825	0.602215	1.69417	3.1196e-159	5.08494e-157	2.33171	5.03402	5092.47	1011.61	neg
128	128-1	HMDB0000045	Adenosine monophosphate	Nucleosides, nucleotides, and analogues	Purine nucleotides	Purine ribonucleotides	C00020	C10H14N5O7P	-H	346.056	0.998043	0.793076	0.990698	0.784161	1.64171	5.63138e-41	4.70726e-40	-0.516245	0.699189	14862.9	21257.3	neg
128	128-2	HMDB0001044	2'-Deoxyguanosine 5'-monophosphate	Nucleosides, nucleotides, and analogues	Purine nucleotides	Purine deoxyribonucleotides	C00362	C10H14N5O7P	-H	346.056	0.998043	0.793076	0.990698	0.784161	1.64171	5.63138e-41	4.70726e-40	-0.516245	0.699189	14862.9	21257.3	neg
128	128-3	HMDB0003540	3'-AMP	Nucleosides, nucleotides, and analogues	Ribonucleoside 3'-phosphates		C01367	C10H14N5O7P	-H	346.056	0.998043	0.793076	0.990698	0.784161	1.64171	5.63138e-41	4.70726e-40	-0.516245	0.699189	14862.9	21257.3	neg
128	128-4	HMDB0011617	Adenosine 2'-phosphate	Organic oxygen compounds	Organooxygen compounds	Carbohydrates and carbohydrate conjugates	C00946	C10H14N5O7P	-H	346.056	0.998043	0.793076	0.990698	0.784161	1.64171	5.63138e-41	4.70726e-40	-0.516245	0.699189	14862.9	21257.3	neg
130	130-1	HMDB0012152	2-O-(6-Phospho-alpha-mannosyl)-D-glycerate	Organic oxygen compounds	Organooxygen compounds	Carbohydrates and carbohydrate conjugates	C16699	C9H17O12P	-H	347.038	0.99861	0.64484	0.981825	0.63224	1.62096	3.76503e-111	3.0685e-109	2.36919	5.1665	4653.19	900.646	neg
120	120-1	HMDB0001976	Docosapentaenoic acid (22n-6)	Lipids and lipid-like molecules	Fatty Acyls	Fatty acids and conjugates		C22H34O2	-H	329.249	0.996515	0.97841	0.990908	0.966136	1.61116	7.22606e-11	1.51006e-10	0.295782	1.22755	72546.1	59098.3	neg
120	120-2	HMDB0032257	Ethyl abietate	Lipids and lipid-like molecules	Prenol lipids	Diterpenoids		C22H34O2	-H	329.249	0.996515	0.97841	0.990908	0.966136	1.61116	7.22606e-11	1.51006e-10	0.295782	1.22755	72546.1	59098.3	neg
120	120-3	HMDB0035024	ent-16-Kauren-19-ol acetate	Lipids and lipid-like molecules	Prenol lipids	Diterpenoids		C22H34O2	-H	329.249	0.996515	0.97841	0.990908	0.966136	1.61116	7.22606e-11	1.51006e-10	0.295782	1.22755	72546.1	59098.3	neg
120	120-4	HMDB0039133	4,8,12,15,19-Docosapentaenoic acid	Lipids and lipid-like molecules	Fatty Acyls	Fatty acids and conjugates		C22H34O2	-H	329.249	0.996515	0.97841	0.990908	0.966136	1.61116	7.22606e-11	1.51006e-10	0.295782	1.22755	72546.1	59098.3	neg
120	120-5	HMDB0039530	Ethyl icosapentate	Lipids and lipid-like molecules	Fatty Acyls	Fatty acid esters	C16184	C22H34O2	-H	329.249	0.996515	0.97841	0.990908	0.966136	1.61116	7.22606e-11	1.51006e-10	0.295782	1.22755	72546.1	59098.3	neg
111	111-1	HMDB0002265	14,15-DiHETrE	Lipids and lipid-like molecules	Fatty Acyls	Eicosanoids	C14775	C20H34O4	-H2O-H	319.228	0.997003	0.787281	0.973037	0.763758	1.59988	2.13877e-102	9.96058e-101	2.06448	4.18282	5302.46	1267.67	neg
111	111-2	HMDB0002311	8,9-DiHETrE	Lipids and lipid-like molecules	Fatty Acyls	Eicosanoids	C14773	C20H34O4	-H2O-H	319.228	0.997003	0.787281	0.973037	0.763758	1.59988	2.13877e-102	9.96058e-101	2.06448	4.18282	5302.46	1267.67	neg
111	111-3	HMDB0002314	11,12-DiHETrE	Lipids and lipid-like molecules	Fatty Acyls	Eicosanoids	C14774	C20H34O4	-H2O-H	319.228	0.997003	0.787281	0.973037	0.763758	1.59988	2.13877e-102	9.96058e-101	2.06448	4.18282	5302.46	1267.67	neg
111	111-4	HMDB0002343	5,6-DHET	Lipids and lipid-like molecules	Fatty Acyls	Eicosanoids	C14772	C20H34O4	-H2O-H	319.228	0.997003	0.787281	0.973037	0.763758	1.59988	2.13877e-102	9.96058e-101	2.06448	4.18282	5302.46	1267.67	neg
111	111-5	HMDB0002995	12-Keto-tetrahydro-leukotriene B4	Lipids and lipid-like molecules	Fatty Acyls	Eicosanoids	C02165	C20H34O4	-H2O-H	319.228	0.997003	0.787281	0.973037	0.763758	1.59988	2.13877e-102	9.96058e-101	2.06448	4.18282	5302.46	1267.67	neg
111	111-6	HMDB0012504	10,11-dihydro-leukotriene B4	Lipids and lipid-like molecules	Fatty Acyls	Eicosanoids		C20H34O4	-H2O-H	319.228	0.997003	0.787281	0.973037	0.763758	1.59988	2.13877e-102	9.96058e-101	2.06448	4.18282	5302.46	1267.67	neg
111	111-7	HMDB0012838	6,7-dihydro-12-epi-LTB4	Lipids and lipid-like molecules	Fatty Acyls	Eicosanoids		C20H34O4	-H2O-H	319.228	0.997003	0.787281	0.973037	0.763758	1.59988	2.13877e-102	9.96058e-101	2.06448	4.18282	5302.46	1267.67	neg
111	111-8	HMDB0035379	Sterebin E	Lipids and lipid-like molecules	Prenol lipids	Diterpenoids		C20H34O4	-H2O-H	319.228	0.997003	0.787281	0.973037	0.763758	1.59988	2.13877e-102	9.96058e-101	2.06448	4.18282	5302.46	1267.67	neg
111	111-9	HMDB0060106	15-Hydroperoxyeicosa-8Z,11Z,13E-trienoate	Lipids and lipid-like molecules	Fatty Acyls	Eicosanoids		C20H34O4	-H2O-H	319.228	0.997003	0.787281	0.973037	0.763758	1.59988	2.13877e-102	9.96058e-101	2.06448	4.18282	5302.46	1267.67	neg
101	101-1	HMDB0002231	11Z-Eicosenoic acid	Lipids and lipid-like molecules	Fatty Acyls	Fatty acids and conjugates	C16526	C20H38O2	-H	309.28	0.997013	0.888797	0.991419	0.878538	1.54704	1.26776e-44	1.37763e-43	0.738655	1.66862	15903.5	9530.95	neg
129	129-1	HMDB0029199	Fertaric acid	Phenylpropanoids and polyketides	Cinnamic acids and derivatives	Hydroxycinnamic acids and derivatives		C14H14O9	+Na-2H	347.038	0.998424	0.625507	0.966255	0.603446	1.42606	4.64744e-163	1.51507e-160	2.38245	5.21422	3484.96	668.357	neg
224	224-1	HMDB0032475	Polyoxyethylene dioleate	Lipids and lipid-like molecules	Fatty Acyls	Fatty acid esters		C38H70O4	+HCOO	635.526	0.997323	0.953414	0.911973	0.867161	1.41113	5.79798e-33	3.5663e-32	0.671207	1.5924	14623.2	9183.11	neg
126	126-1	HMDB0059997	Dihyroxy-1H-indole glucuronide I	Organic oxygen compounds	Organooxygen compounds	Carbohydrates and carbohydrate conjugates		C14H15NO8	+Na-2H	346.054	0.99797	0.795266	0.976547	0.775038	1.37244	6.28356e-41	5.1211e-40	-0.510181	0.702134	10686.4	15219.9	neg
214	214-1	HMDB0033753	Glycerol 1,3-didodecanoate 2-decanoate	Lipids and lipid-like molecules	Glycerolipids	Triradylcglycerols		C37H70O6	-H	609.51	0.997031	0.929537	0.93056	0.862422	1.36256	3.66762e-36	2.49092e-35	0.496673	1.41096	16882.4	11965.3	neg
214	214-2	HMDB0038058	Glycerol 1-dodecanoate 2-tetradecanoate 3-octanoate	Lipids and lipid-like molecules	Glycerolipids	Triradylcglycerols		C37H70O6	-H	609.51	0.997031	0.929537	0.93056	0.862422	1.36256	3.66762e-36	2.49092e-35	0.496673	1.41096	16882.4	11965.3	neg
214	214-3	HMDB0071115	TG(34:0)	Lipids and lipid-like molecules	Glycerolipids	Triradylcglycerols		C37H70O6	-H	609.51	0.997031	0.929537	0.93056	0.862422	1.36256	3.66762e-36	2.49092e-35	0.496673	1.41096	16882.4	11965.3	neg
7	7-1	HMDB0000251	Taurine	Organic acids and derivatives	Organic sulfonic acids and derivatives	Organosulfonic acids and derivatives	C00245	C2H7NO3S	-H	124.007	0.998776	0.883862	0.996908	0.880051	1.34129	7.11729e-07	1.31087e-06	0.205444	1.15304	103085	89402.4	neg
119	119-1	HMDB0005060	Eicosadienoic acid	Lipids and lipid-like molecules	Fatty Acyls	Fatty acids and conjugates	C16525	C20H36O2	+Na-2H	329.246	0.996318	0.971041	0.994492	0.962137	1.32054	5.90819e-11	1.25887e-10	0.290604	1.22315	48720.3	39831.8	neg
119	119-2	HMDB0036827	Sclareol	Lipids and lipid-like molecules	Prenol lipids	Diterpenoids	C09183	C20H36O2	+Na-2H	329.246	0.996318	0.971041	0.994492	0.962137	1.32054	5.90819e-11	1.25887e-10	0.290604	1.22315	48720.3	39831.8	neg
119	119-3	HMDB0062432	8Z,11Z-eicosadienoic acid	Lipids and lipid-like molecules	Fatty Acyls	Fatty acids and conjugates		C20H36O2	+Na-2H	329.246	0.996318	0.971041	0.994492	0.962137	1.32054	5.90819e-11	1.25887e-10	0.290604	1.22315	48720.3	39831.8	neg
17	17-1	HMDB0000044	Ascorbic acid	Organoheterocyclic compounds	Dihydrofurans	Furanones	C01041	C6H8O6	-H	175.025	0.997783	0.943167	0.995246	0.936602	1.2863	1.87702e-05	3.25483e-05	0.190551	1.1412	84095.3	73690.3	neg
17	17-2	HMDB0006355	D-Glucurono-6,3-lactone	Organoheterocyclic compounds	Furofurans	Isosorbides	C02670	C6H8O6	-H	175.025	0.997783	0.943167	0.995246	0.936602	1.2863	1.87702e-05	3.25483e-05	0.190551	1.1412	84095.3	73690.3	neg
17	17-3	HMDB0031193	1,2,3-Propanetricarboxylic acid	Organic acids and derivatives	Carboxylic acids and derivatives	Tricarboxylic acids and derivatives	C19806	C6H8O6	-H	175.025	0.997783	0.943167	0.995246	0.936602	1.2863	1.87702e-05	3.25483e-05	0.190551	1.1412	84095.3	73690.3	neg
45	45-1	HMDB0000477	7Z,10Z-Hexadecadienoic acid	Lipids and lipid-like molecules	Fatty Acyls	Fatty acids and conjugates		C16H28O2	-H	251.202	0.996275	0.717977	0.966271	0.691176	1.27247	9.27994e-69	3.3614e-67	0.963293	1.94976	6285.94	3223.96	neg
45	45-2	HMDB0029351	Geranyl hexanoate	Lipids and lipid-like molecules	Fatty Acyls	Fatty alcohol esters		C16H28O2	-H	251.202	0.996275	0.717977	0.966271	0.691176	1.27247	9.27994e-69	3.3614e-67	0.963293	1.94976	6285.94	3223.96	neg
45	45-3	HMDB0030429	Linalyl hexanoate	Lipids and lipid-like molecules	Prenol lipids	Monoterpenoids		C16H28O2	-H	251.202	0.996275	0.717977	0.966271	0.691176	1.27247	9.27994e-69	3.3614e-67	0.963293	1.94976	6285.94	3223.96	neg
45	45-4	HMDB0031086	(Z)-7-Hexadecen-1,16-olide	Phenylpropanoids and polyketides	Macrolides and analogues			C16H28O2	-H	251.202	0.996275	0.717977	0.966271	0.691176	1.27247	9.27994e-69	3.3614e-67	0.963293	1.94976	6285.94	3223.96	neg
45	45-5	HMDB0032340	Isoambrettolide	Phenylpropanoids and polyketides	Macrolides and analogues			C16H28O2	-H	251.202	0.996275	0.717977	0.966271	0.691176	1.27247	9.27994e-69	3.3614e-67	0.963293	1.94976	6285.94	3223.96	neg
45	45-6	HMDB0038255	Geranyl 2-ethylbutyrate	Lipids and lipid-like molecules	Fatty Acyls	Fatty alcohol esters		C16H28O2	-H	251.202	0.996275	0.717977	0.966271	0.691176	1.27247	9.27994e-69	3.3614e-67	0.963293	1.94976	6285.94	3223.96	neg
45	45-7	HMDB0039131	Ethyl (Z,Z)-5,8-tetradecadienoate	Lipids and lipid-like molecules	Fatty Acyls	Fatty acid esters		C16H28O2	-H	251.202	0.996275	0.717977	0.966271	0.691176	1.27247	9.27994e-69	3.3614e-67	0.963293	1.94976	6285.94	3223.96	neg
202	202-1	HMDB0007072	DG(33:1)	Lipids and lipid-like molecules	Glycerolipids	Diradylglycerols		C36H68O5	-H2O-H	561.489	0.997196	0.914152	0.943741	0.860303	1.26509	2.73081e-44	2.78201e-43	0.962629	1.94886	7741.7	3972.43	neg
199	199-1	HMDB0007074	DG(33:2)	Lipids and lipid-like molecules	Fatty Acyls	Lineolic acids and derivatives		C36H66O5	-H2O-H	559.473	0.996853	0.886962	0.851861	0.75319	1.18287	2.03537e-52	4.42353e-51	1.0218	2.03046	6050.48	2979.86	neg
199	199-2	HMDB0055967	DG(32:2)	Lipids and lipid-like molecules	Glycerolipids	Diradylglycerols		C36H66O5	-H2O-H	559.473	0.996853	0.886962	0.851861	0.75319	1.18287	2.03537e-52	4.42353e-51	1.0218	2.03046	6050.48	2979.86	neg
265	265-1	HMDB0010575	PG(34:2)	Lipids and lipid-like molecules	Glycerophospholipids	Glycerophosphoglycerols		C40H75O10P	-H	745.503	0.997618	0.949621	0.870834	0.824992	1.18143	6.32061e-12	1.41131e-11	0.252651	1.19139	41014.2	34425.4	neg
109	109-1	HMDB0001085	Leukotriene B4	Lipids and lipid-like molecules	Fatty Acyls	Eicosanoids	C02165	C20H32O4	-H2O-H	317.212	0.995969	0.648334	0.963576	0.622201	1.18022	1.25613e-110	8.18998e-109	1.63976	3.11613	3259.17	1045.9	neg
109	109-10	HMDB0010219	8,15-DiHETE	Lipids and lipid-like molecules	Fatty Acyls	Eicosanoids		C20H32O4	-H2O-H	317.212	0.995969	0.648334	0.963576	0.622201	1.18022	1.25613e-110	8.18998e-109	1.63976	3.11613	3259.17	1045.9	neg
109	109-11	HMDB0012498	10,11-dihydro-12-oxo-LTB4	Lipids and lipid-like molecules	Fatty Acyls	Eicosanoids		C20H32O4	-H2O-H	317.212	0.995969	0.648334	0.963576	0.622201	1.18022	1.25613e-110	8.18998e-109	1.63976	3.11613	3259.17	1045.9	neg
109	109-12	HMDB0012839	6,7-dihydro-5-oxo-12-epi-LTB4	Lipids and lipid-like molecules	Fatty Acyls	Eicosanoids		C20H32O4	-H2O-H	317.212	0.995969	0.648334	0.963576	0.622201	1.18022	1.25613e-110	8.18998e-109	1.63976	3.11613	3259.17	1045.9	neg
109	109-13	HMDB0060103	9-Deoxy-delta12-PGD2	Lipids and lipid-like molecules	Fatty Acyls	Eicosanoids		C20H32O4	-H2O-H	317.212	0.995969	0.648334	0.963576	0.622201	1.18022	1.25613e-110	8.18998e-109	1.63976	3.11613	3259.17	1045.9	neg
109	109-14	HMDB0062409	5,12-dihydroxy-6,8,10,14-eicosatetraenoic acid	Lipids and lipid-like molecules	Fatty Acyls	Eicosanoids		C20H32O4	-H2O-H	317.212	0.995969	0.648334	0.963576	0.622201	1.18022	1.25613e-110	8.18998e-109	1.63976	3.11613	3259.17	1045.9	neg
109	109-15	HMDB0062479	10-hydroxy-11S,12S-epoxy-5Z,8Z,14Z-eicosatrienoic acid	Lipids and lipid-like molecules	Fatty Acyls	Eicosanoids		C20H32O4	-H2O-H	317.212	0.995969	0.648334	0.963576	0.622201	1.18022	1.25613e-110	8.18998e-109	1.63976	3.11613	3259.17	1045.9	neg
109	109-16	HMDB0062615	5(S),11(R)-DiHETE	Lipids and lipid-like molecules	Fatty Acyls	Eicosanoids		C20H32O4	-H2O-H	317.212	0.995969	0.648334	0.963576	0.622201	1.18022	1.25613e-110	8.18998e-109	1.63976	3.11613	3259.17	1045.9	neg
109	109-17	HMDB0062619	(5Z,9E,14Z)-(8xi,11R,12S)-11,12-epoxy-8-hydroxyicosa-5,9,14-trienoic Acid	Lipids and lipid-like molecules	Fatty Acyls	Eicosanoids	C04849	C20H32O4	-H2O-H	317.212	0.995969	0.648334	0.963576	0.622201	1.18022	1.25613e-110	8.18998e-109	1.63976	3.11613	3259.17	1045.9	neg
109	109-18	HMDB0062749	5(S),15(R)-DiHETE					C20H32O4	-H2O-H	317.212	0.995969	0.648334	0.963576	0.622201	1.18022	1.25613e-110	8.18998e-109	1.63976	3.11613	3259.17	1045.9	neg
109	109-2	HMDB0004688	Hepoxilin A3	Lipids and lipid-like molecules	Fatty Acyls	Eicosanoids	C14808	C20H32O4	-H2O-H	317.212	0.995969	0.648334	0.963576	0.622201	1.18022	1.25613e-110	8.18998e-109	1.63976	3.11613	3259.17	1045.9	neg
109	109-3	HMDB0004690	Hepoxilin B3	Lipids and lipid-like molecules	Fatty Acyls	Eicosanoids	C14810	C20H32O4	-H2O-H	317.212	0.995969	0.648334	0.963576	0.622201	1.18022	1.25613e-110	8.18998e-109	1.63976	3.11613	3259.17	1045.9	neg
109	109-4	HMDB0004693	11H-14,15-EETA	Lipids and lipid-like molecules	Fatty Acyls	Fatty acids and conjugates	C14813	C20H32O4	-H2O-H	317.212	0.995969	0.648334	0.963576	0.622201	1.18022	1.25613e-110	8.18998e-109	1.63976	3.11613	3259.17	1045.9	neg
109	109-5	HMDB0005050	15H-11,12-EETA	Organic acids and derivatives	Hydroxy acids and derivatives	Medium-chain hydroxy acids and derivatives	C14781	C20H32O4	-H2O-H	317.212	0.995969	0.648334	0.963576	0.622201	1.18022	1.25613e-110	8.18998e-109	1.63976	3.11613	3259.17	1045.9	neg
109	109-6	HMDB0005087	6-trans-Leukotriene B4	Lipids and lipid-like molecules	Fatty Acyls	Eicosanoids		C20H32O4	-H2O-H	317.212	0.995969	0.648334	0.963576	0.622201	1.18022	1.25613e-110	8.18998e-109	1.63976	3.11613	3259.17	1045.9	neg
109	109-7	HMDB0005088	6-trans-12-epi-Leukotriene B4	Lipids and lipid-like molecules	Fatty Acyls	Eicosanoids		C20H32O4	-H2O-H	317.212	0.995969	0.648334	0.963576	0.622201	1.18022	1.25613e-110	8.18998e-109	1.63976	3.11613	3259.17	1045.9	neg
109	109-8	HMDB0005089	12(S)-Leukotriene B4	Lipids and lipid-like molecules	Fatty Acyls	Eicosanoids	C04853	C20H32O4	-H2O-H	317.212	0.995969	0.648334	0.963576	0.622201	1.18022	1.25613e-110	8.18998e-109	1.63976	3.11613	3259.17	1045.9	neg
109	109-9	HMDB0010216	5,15-DiHETE	Lipids and lipid-like molecules	Fatty Acyls	Eicosanoids		C20H32O4	-H2O-H	317.212	0.995969	0.648334	0.963576	0.622201	1.18022	1.25613e-110	8.18998e-109	1.63976	3.11613	3259.17	1045.9	neg
185	185-1	HMDB0112108	FAHFA(16:1/9-O-18:0)	Lipids and lipid-like molecules	Fatty Acyls	Fatty acids and conjugates		C34H64O4	-H	535.473	0.997251	0.862836	0.937721	0.806875	1.13523	7.08261e-51	1.33824e-49	0.882839	1.844	6248.75	3388.69	neg
185	185-10	HMDB0112162	FAHFA(18:1/5-O-16:0)	Lipids and lipid-like molecules	Fatty Acyls	Fatty acids and conjugates		C34H64O4	-H	535.473	0.997251	0.862836	0.937721	0.806875	1.13523	7.08261e-51	1.33824e-49	0.882839	1.844	6248.75	3388.69	neg
185	185-11	HMDB0112163	FAHFA(18:1/7-O-16:0)	Lipids and lipid-like molecules	Fatty Acyls	Fatty acids and conjugates		C34H64O4	-H	535.473	0.997251	0.862836	0.937721	0.806875	1.13523	7.08261e-51	1.33824e-49	0.882839	1.844	6248.75	3388.69	neg
185	185-12	HMDB0112164	FAHFA(18:1/8-O-16:0)	Lipids and lipid-like molecules	Fatty Acyls	Fatty acids and conjugates		C34H64O4	-H	535.473	0.997251	0.862836	0.937721	0.806875	1.13523	7.08261e-51	1.33824e-49	0.882839	1.844	6248.75	3388.69	neg
185	185-13	HMDB0112165	FAHFA(18:1/10-O-16:0)	Lipids and lipid-like molecules	Fatty Acyls	Fatty acids and conjugates		C34H64O4	-H	535.473	0.997251	0.862836	0.937721	0.806875	1.13523	7.08261e-51	1.33824e-49	0.882839	1.844	6248.75	3388.69	neg
185	185-14	HMDB0112166	FAHFA(18:1/11-O-16:0)	Lipids and lipid-like molecules	Fatty Acyls	Fatty acids and conjugates		C34H64O4	-H	535.473	0.997251	0.862836	0.937721	0.806875	1.13523	7.08261e-51	1.33824e-49	0.882839	1.844	6248.75	3388.69	neg
185	185-15	HMDB0112167	FAHFA(18:1/12-O-16:0)	Lipids and lipid-like molecules	Fatty Acyls	Fatty acids and conjugates		C34H64O4	-H	535.473	0.997251	0.862836	0.937721	0.806875	1.13523	7.08261e-51	1.33824e-49	0.882839	1.844	6248.75	3388.69	neg
185	185-16	HMDB0112168	FAHFA(18:1/13-O-16:0)	Lipids and lipid-like molecules	Fatty Acyls	Fatty acids and conjugates		C34H64O4	-H	535.473	0.997251	0.862836	0.937721	0.806875	1.13523	7.08261e-51	1.33824e-49	0.882839	1.844	6248.75	3388.69	neg
185	185-17	HMDB0112172	FAHFA(16:1/6-O-18:0)	Lipids and lipid-like molecules	Fatty Acyls	Fatty acids and conjugates		C34H64O4	-H	535.473	0.997251	0.862836	0.937721	0.806875	1.13523	7.08261e-51	1.33824e-49	0.882839	1.844	6248.75	3388.69	neg
185	185-18	HMDB0112175	FAHFA(18:1/6-O-16:0)	Lipids and lipid-like molecules	Fatty Acyls	Fatty acids and conjugates		C34H64O4	-H	535.473	0.997251	0.862836	0.937721	0.806875	1.13523	7.08261e-51	1.33824e-49	0.882839	1.844	6248.75	3388.69	neg
185	185-2	HMDB0112117	FAHFA(16:1/12-O-18:0)	Lipids and lipid-like molecules	Fatty Acyls	Fatty acids and conjugates		C34H64O4	-H	535.473	0.997251	0.862836	0.937721	0.806875	1.13523	7.08261e-51	1.33824e-49	0.882839	1.844	6248.75	3388.69	neg
185	185-3	HMDB0112122	FAHFA(18:1/9-O-16:0)	Lipids and lipid-like molecules	Fatty Acyls	Fatty acids and conjugates		C34H64O4	-H	535.473	0.997251	0.862836	0.937721	0.806875	1.13523	7.08261e-51	1.33824e-49	0.882839	1.844	6248.75	3388.69	neg
185	185-4	HMDB0112134	FAHFA(16:1/5-O-18:0)	Lipids and lipid-like molecules	Fatty Acyls	Fatty acids and conjugates		C34H64O4	-H	535.473	0.997251	0.862836	0.937721	0.806875	1.13523	7.08261e-51	1.33824e-49	0.882839	1.844	6248.75	3388.69	neg
185	185-5	HMDB0112135	FAHFA(16:1/7-O-18:0)	Lipids and lipid-like molecules	Fatty Acyls	Fatty acids and conjugates		C34H64O4	-H	535.473	0.997251	0.862836	0.937721	0.806875	1.13523	7.08261e-51	1.33824e-49	0.882839	1.844	6248.75	3388.69	neg
185	185-6	HMDB0112136	FAHFA(16:1/8-O-18:0)	Lipids and lipid-like molecules	Fatty Acyls	Fatty acids and conjugates		C34H64O4	-H	535.473	0.997251	0.862836	0.937721	0.806875	1.13523	7.08261e-51	1.33824e-49	0.882839	1.844	6248.75	3388.69	neg
185	185-7	HMDB0112137	FAHFA(16:1/10-O-18:0)	Lipids and lipid-like molecules	Fatty Acyls	Fatty acids and conjugates		C34H64O4	-H	535.473	0.997251	0.862836	0.937721	0.806875	1.13523	7.08261e-51	1.33824e-49	0.882839	1.844	6248.75	3388.69	neg
185	185-8	HMDB0112138	FAHFA(16:1/11-O-18:0)	Lipids and lipid-like molecules	Fatty Acyls	Fatty acids and conjugates		C34H64O4	-H	535.473	0.997251	0.862836	0.937721	0.806875	1.13523	7.08261e-51	1.33824e-49	0.882839	1.844	6248.75	3388.69	neg
185	185-9	HMDB0112139	FAHFA(16:1/13-O-18:0)	Lipids and lipid-like molecules	Fatty Acyls	Fatty acids and conjugates		C34H64O4	-H	535.473	0.997251	0.862836	0.937721	0.806875	1.13523	7.08261e-51	1.33824e-49	0.882839	1.844	6248.75	3388.69	neg
198	198-1	HMDB0112106	FAHFA(16:0/9-O-18:0)	Lipids and lipid-like molecules	Fatty Acyls	Fatty acids and conjugates		C34H66O4	+Na-2H	559.471	0.997078	0.87805	0.935412	0.818938	1.08412	1.19843e-53	3.00529e-52	0.996253	1.99481	5162.57	2588	neg
198	198-10	HMDB0112147	FAHFA(18:0/7-O-16:0)	Lipids and lipid-like molecules	Fatty Acyls	Fatty acids and conjugates		C34H66O4	+Na-2H	559.471	0.997078	0.87805	0.935412	0.818938	1.08412	1.19843e-53	3.00529e-52	0.996253	1.99481	5162.57	2588	neg
198	198-11	HMDB0112148	FAHFA(18:0/8-O-16:0)	Lipids and lipid-like molecules	Fatty Acyls	Fatty acids and conjugates		C34H66O4	+Na-2H	559.471	0.997078	0.87805	0.935412	0.818938	1.08412	1.19843e-53	3.00529e-52	0.996253	1.99481	5162.57	2588	neg
198	198-12	HMDB0112149	FAHFA(18:0/9-O-16:0)	Lipids and lipid-like molecules	Fatty Acyls	Fatty acids and conjugates		C34H66O4	+Na-2H	559.471	0.997078	0.87805	0.935412	0.818938	1.08412	1.19843e-53	3.00529e-52	0.996253	1.99481	5162.57	2588	neg
198	198-13	HMDB0112150	FAHFA(18:0/10-O-16:0)	Lipids and lipid-like molecules	Fatty Acyls	Fatty acids and conjugates		C34H66O4	+Na-2H	559.471	0.997078	0.87805	0.935412	0.818938	1.08412	1.19843e-53	3.00529e-52	0.996253	1.99481	5162.57	2588	neg
198	198-14	HMDB0112151	FAHFA(18:0/11-O-16:0)	Lipids and lipid-like molecules	Fatty Acyls	Fatty acids and conjugates		C34H66O4	+Na-2H	559.471	0.997078	0.87805	0.935412	0.818938	1.08412	1.19843e-53	3.00529e-52	0.996253	1.99481	5162.57	2588	neg
198	198-15	HMDB0112152	FAHFA(18:0/12-O-16:0)	Lipids and lipid-like molecules	Fatty Acyls	Fatty acids and conjugates		C34H66O4	+Na-2H	559.471	0.997078	0.87805	0.935412	0.818938	1.08412	1.19843e-53	3.00529e-52	0.996253	1.99481	5162.57	2588	neg
198	198-16	HMDB0112153	FAHFA(18:0/13-O-16:0)	Lipids and lipid-like molecules	Fatty Acyls	Fatty acids and conjugates		C34H66O4	+Na-2H	559.471	0.997078	0.87805	0.935412	0.818938	1.08412	1.19843e-53	3.00529e-52	0.996253	1.99481	5162.57	2588	neg
198	198-17	HMDB0112176	FAHFA(16:0/6-O-18:0)	Lipids and lipid-like molecules	Fatty Acyls	Fatty acids and conjugates		C34H66O4	+Na-2H	559.471	0.997078	0.87805	0.935412	0.818938	1.08412	1.19843e-53	3.00529e-52	0.996253	1.99481	5162.57	2588	neg
198	198-18	HMDB0112179	FAHFA(18:0/6-O-16:0)	Lipids and lipid-like molecules	Fatty Acyls	Fatty acids and conjugates		C34H66O4	+Na-2H	559.471	0.997078	0.87805	0.935412	0.818938	1.08412	1.19843e-53	3.00529e-52	0.996253	1.99481	5162.57	2588	neg
198	198-2	HMDB0112107	FAHFA(16:0/5-O-18:0)	Lipids and lipid-like molecules	Fatty Acyls	Fatty acids and conjugates		C34H66O4	+Na-2H	559.471	0.997078	0.87805	0.935412	0.818938	1.08412	1.19843e-53	3.00529e-52	0.996253	1.99481	5162.57	2588	neg
198	198-3	HMDB0112111	FAHFA(16:0/10-O-18:0)	Lipids and lipid-like molecules	Fatty Acyls	Fatty acids and conjugates		C34H66O4	+Na-2H	559.471	0.997078	0.87805	0.935412	0.818938	1.08412	1.19843e-53	3.00529e-52	0.996253	1.99481	5162.57	2588	neg
198	198-4	HMDB0112113	FAHFA(16:0/12-O-18:0)	Lipids and lipid-like molecules	Fatty Acyls	Fatty acids and conjugates		C34H66O4	+Na-2H	559.471	0.997078	0.87805	0.935412	0.818938	1.08412	1.19843e-53	3.00529e-52	0.996253	1.99481	5162.57	2588	neg
198	198-5	HMDB0112116	FAHFA(16:0/7-O-18:0)	Lipids and lipid-like molecules	Fatty Acyls	Fatty acids and conjugates		C34H66O4	+Na-2H	559.471	0.997078	0.87805	0.935412	0.818938	1.08412	1.19843e-53	3.00529e-52	0.996253	1.99481	5162.57	2588	neg
198	198-6	HMDB0112118	FAHFA(16:0/8-O-18:0)	Lipids and lipid-like molecules	Fatty Acyls	Fatty acids and conjugates		C34H66O4	+Na-2H	559.471	0.997078	0.87805	0.935412	0.818938	1.08412	1.19843e-53	3.00529e-52	0.996253	1.99481	5162.57	2588	neg
198	198-7	HMDB0112119	FAHFA(16:0/11-O-18:0)	Lipids and lipid-like molecules	Fatty Acyls	Fatty acids and conjugates		C34H66O4	+Na-2H	559.471	0.997078	0.87805	0.935412	0.818938	1.08412	1.19843e-53	3.00529e-52	0.996253	1.99481	5162.57	2588	neg
198	198-8	HMDB0112121	FAHFA(16:0/13-O-18:0)	Lipids and lipid-like molecules	Fatty Acyls	Fatty acids and conjugates		C34H66O4	+Na-2H	559.471	0.997078	0.87805	0.935412	0.818938	1.08412	1.19843e-53	3.00529e-52	0.996253	1.99481	5162.57	2588	neg
198	198-9	HMDB0112146	FAHFA(18:0/5-O-16:0)	Lipids and lipid-like molecules	Fatty Acyls	Fatty acids and conjugates		C34H66O4	+Na-2H	559.471	0.997078	0.87805	0.935412	0.818938	1.08412	1.19843e-53	3.00529e-52	0.996253	1.99481	5162.57	2588	neg
44	44-1	HMDB0032246	Dodecanal dimethyl acetal	Organic oxygen compounds	Organooxygen compounds	Ethers		C14H30O2	+Na-2H	251.199	0.996448	0.700237	0.981463	0.684816	1.06918	2.13644e-71	8.706e-70	0.980171	1.9727	4337.1	2198.56	neg
44	44-2	HMDB0038678	1,1-Dihexyloxyethane	Organic oxygen compounds	Organooxygen compounds	Ethers		C14H30O2	+Na-2H	251.199	0.996448	0.700237	0.981463	0.684816	1.06918	2.13644e-71	8.706e-70	0.980171	1.9727	4337.1	2198.56	neg
309	309-1	HMDB0010163	PS(36:1)	Lipids and lipid-like molecules	Glycerophospholipids	Glycerophosphoserines	C02737	C42H80NO10P	-H	788.545	0.997464	0.858316	0.975256	0.834955	1.06494	4.29594e-52	8.75298e-51	-0.490233	0.71191	6291.87	8838.01	neg
16	16-1	HMDB0041503	Bis(2-furanylmethyl) sulfide	Organoheterocyclic compounds	Heteroaromatic compounds			C10H10O2S	-H2O-H	175.022	0.997719	0.639419	0.975636	0.622417	1.03886	2.31565e-05	3.97316e-05	0.18581	1.13746	57886.8	50891.5	neg
22	22-1	HMDB0000954	Ferulic acid	Phenylpropanoids and polyketides	Cinnamic acids and derivatives	Hydroxycinnamic acids and derivatives	C01494	C10H10O4	+Na-2H	215.033	0.998204	0.743059	0.972273	0.721159	1.01746	7.38632e-21	2.45708e-20	-0.46684	0.723548	9237.27	12766.6	neg
22	22-2	HMDB0029663	Vanillin acetate	Benzenoids	Phenol esters			C10H10O4	+Na-2H	215.033	0.998204	0.743059	0.972273	0.721159	1.01746	7.38632e-21	2.45708e-20	-0.46684	0.723548	9237.27	12766.6	neg
22	22-3	HMDB0030765	(-)-trans-3,4-Dihydro-4,8-dihydroxy-3-methyl-1H-2-benzopyran-1-one	Organoheterocyclic compounds	Benzopyrans	2-benzopyrans		C10H10O4	+Na-2H	215.033	0.998204	0.743059	0.972273	0.721159	1.01746	7.38632e-21	2.45708e-20	-0.46684	0.723548	9237.27	12766.6	neg
22	22-4	HMDB0032614	Piperonyl acetate	Organoheterocyclic compounds	Benzodioxoles			C10H10O4	+Na-2H	215.033	0.998204	0.743059	0.972273	0.721159	1.01746	7.38632e-21	2.45708e-20	-0.46684	0.723548	9237.27	12766.6	neg
22	22-5	HMDB0032652	Meconine	Organoheterocyclic compounds	Isocoumarans	Isobenzofuranones		C10H10O4	+Na-2H	215.033	0.998204	0.743059	0.972273	0.721159	1.01746	7.38632e-21	2.45708e-20	-0.46684	0.723548	9237.27	12766.6	neg
21	21-1	HMDB0000122	D-Glucose	Organic oxygen compounds	Organooxygen compounds	Carbohydrates and carbohydrate conjugates	C00221	C6H12O6	+Cl	215.032	0.99815	0.901364	0.985677	0.88681	1.0166	1.00059e-21	3.62436e-21	-0.467046	0.723444	9012.04	12457.1	neg
21	21-2	HMDB0000143	D-Galactose	Organic oxygen compounds	Organooxygen compounds	Carbohydrates and carbohydrate conjugates	C00984	C6H12O6	+Cl	215.032	0.99815	0.901364	0.985677	0.88681	1.0166	1.00059e-21	3.62436e-21	-0.467046	0.723444	9012.04	12457.1	neg
21	21-3	HMDB0000169	D-Mannose	Organic oxygen compounds	Organooxygen compounds	Carbohydrates and carbohydrate conjugates	C00936	C6H12O6	+Cl	215.032	0.99815	0.901364	0.985677	0.88681	1.0166	1.00059e-21	3.62436e-21	-0.467046	0.723444	9012.04	12457.1	neg
21	21-4	HMDB0000660	D-Fructose	Organic oxygen compounds	Organooxygen compounds	Carbohydrates and carbohydrate conjugates	C02336	C6H12O6	+Cl	215.032	0.99815	0.901364	0.985677	0.88681	1.0166	1.00059e-21	3.62436e-21	-0.467046	0.723444	9012.04	12457.1	neg
21	21-5	HMDB0001151	Allose	Organic oxygen compounds	Organooxygen compounds	Carbohydrates and carbohydrate conjugates	C01487	C6H12O6	+Cl	215.032	0.99815	0.901364	0.985677	0.88681	1.0166	1.00059e-21	3.62436e-21	-0.467046	0.723444	9012.04	12457.1	neg
21	21-6	HMDB0001266	L-Sorbose	Organic oxygen compounds	Organooxygen compounds	Carbohydrates and carbohydrate conjugates	C08356	C6H12O6	+Cl	215.032	0.99815	0.901364	0.985677	0.88681	1.0166	1.00059e-21	3.62436e-21	-0.467046	0.723444	9012.04	12457.1	neg
21	21-7	HMDB0003345	alpha-D-Glucose	Organic oxygen compounds	Organooxygen compounds	Carbohydrates and carbohydrate conjugates	C00267	C6H12O6	+Cl	215.032	0.99815	0.901364	0.985677	0.88681	1.0166	1.00059e-21	3.62436e-21	-0.467046	0.723444	9012.04	12457.1	neg
21	21-8	HMDB0003449	beta-D-Galactose	Organic oxygen compounds	Organooxygen compounds	Carbohydrates and carbohydrate conjugates	C00962	C6H12O6	+Cl	215.032	0.99815	0.901364	0.985677	0.88681	1.0166	1.00059e-21	3.62436e-21	-0.467046	0.723444	9012.04	12457.1	neg
133	133-1	HMDB0060031	5-(3',5'-Dihydroxyphenyl)-gamma-valerolactone-O-sulphate-O-methyl	Organic acids and derivatives	Organic sulfuric acids and derivatives	Arylsulfates		C12H14O7S	+HCOO	347.044	0.998749	0.565129	0.959449	0.541534	1.00272	2.35194e-141	2.55577e-139	2.40178	5.28456	1731.08	327.573	neg
6	6-1	HMDB0006478	Isovaleraldehyde	Organic oxygen compounds	Organooxygen compounds	Carbonyl compounds	C07329	C5H10O	+NH4	104.107	0.998198	0.918402	0.997813	0.914742	8.83817	1.89723e-75	7.34229e-73	0.972103	1.9617	247575	126204	pos
6	6-2	HMDB0030124	Prenol	Organic oxygen compounds	Organooxygen compounds	Alcohols and polyols	C01390	C5H10O	+NH4	104.107	0.998198	0.918402	0.997813	0.914742	8.83817	1.89723e-75	7.34229e-73	0.972103	1.9617	247575	126204	pos
6	6-3	HMDB0030126	3-Methyl-3-buten-1-ol	Organic oxygen compounds	Organooxygen compounds	Alcohols and polyols		C5H10O	+NH4	104.107	0.998198	0.918402	0.997813	0.914742	8.83817	1.89723e-75	7.34229e-73	0.972103	1.9617	247575	126204	pos
6	6-4	HMDB0031206	Pentanal	Organic oxygen compounds	Organooxygen compounds	Carbonyl compounds		C5H10O	+NH4	104.107	0.998198	0.918402	0.997813	0.914742	8.83817	1.89723e-75	7.34229e-73	0.972103	1.9617	247575	126204	pos
6	6-5	HMDB0031525	(S)-2-Methylbutanal	Organic oxygen compounds	Organooxygen compounds	Carbonyl compounds		C5H10O	+NH4	104.107	0.998198	0.918402	0.997813	0.914742	8.83817	1.89723e-75	7.34229e-73	0.972103	1.9617	247575	126204	pos
6	6-6	HMDB0031526	(±)-2-Methylbutanal	Organic oxygen compounds	Organooxygen compounds	Carbonyl compounds	C02223	C5H10O	+NH4	104.107	0.998198	0.918402	0.997813	0.914742	8.83817	1.89723e-75	7.34229e-73	0.972103	1.9617	247575	126204	pos
6	6-7	HMDB0031604	(E)-2-Penten-1-ol	Organic oxygen compounds	Organooxygen compounds	Alcohols and polyols		C5H10O	+NH4	104.107	0.998198	0.918402	0.997813	0.914742	8.83817	1.89723e-75	7.34229e-73	0.972103	1.9617	247575	126204	pos
6	6-8	HMDB0031605	1-Penten-3-ol	Organic oxygen compounds	Organooxygen compounds	Alcohols and polyols		C5H10O	+NH4	104.107	0.998198	0.918402	0.997813	0.914742	8.83817	1.89723e-75	7.34229e-73	0.972103	1.9617	247575	126204	pos
153	153-1	HMDB0001518	alpha-CEHC	Organoheterocyclic compounds	Benzopyrans	1-benzopyrans		C16H22O4	+K	317.115	0.998468	0.983699	0.996392	0.978648	5.55732	3.37252e-15	3.62546e-14	-0.171245	0.888076	821252	924754	pos
153	153-2	HMDB0013248	Monoethylhexyl phthalic acid	Benzenoids	Benzene and substituted derivatives	Benzoic acids and derivatives	C03343	C16H22O4	+K	317.115	0.998468	0.983699	0.996392	0.978648	5.55732	3.37252e-15	3.62546e-14	-0.171245	0.888076	821252	924754	pos
153	153-3	HMDB0013835	Diisobutyl phthalate	Benzenoids	Benzene and substituted derivatives	Benzoic acids and derivatives	C15205	C16H22O4	+K	317.115	0.998468	0.983699	0.996392	0.978648	5.55732	3.37252e-15	3.62546e-14	-0.171245	0.888076	821252	924754	pos
154	154-1	HMDB0014618	Chlordiazepoxide	Organoheterocyclic compounds	Benzodiazepines	1,4-benzodiazepines		C16H14ClN3O	+NH4	317.116	0.998409	0.967716	0.917545	0.88651	4.75831	2.96777e-16	4.25381e-15	-0.173854	0.886471	580267	654580	pos
197	197-1	HMDB0031465	Methyl-[10]-shogaol	Benzenoids	Benzene and substituted derivatives	Methoxybenzenes		C22H34O3	+Na	369.24	0.997971	0.967448	0.985465	0.951452	4.55518	1.71826e-19	5.11514e-18	-0.190851	0.876089	428016	488554	pos
197	197-2	HMDB0034944	Siderol	Lipids and lipid-like molecules	Prenol lipids	Diterpenoids		C22H34O3	+Na	369.24	0.997971	0.967448	0.985465	0.951452	4.55518	1.71826e-19	5.11514e-18	-0.190851	0.876089	428016	488554	pos
197	197-3	HMDB0036722	ent-17-Acetoxy-16b-kauran-19-al	Lipids and lipid-like molecules	Prenol lipids	Diterpenoids		C22H34O3	+Na	369.24	0.997971	0.967448	0.985465	0.951452	4.55518	1.71826e-19	5.11514e-18	-0.190851	0.876089	428016	488554	pos
197	197-4	HMDB0041001	Volemolide	Lipids and lipid-like molecules	Prenol lipids	Terpene lactones		C22H34O3	+Na	369.24	0.997971	0.967448	0.985465	0.951452	4.55518	1.71826e-19	5.11514e-18	-0.190851	0.876089	428016	488554	pos
151	151-1	HMDB0034937	Cappariloside A	Organic oxygen compounds	Organooxygen compounds	Carbohydrates and carbohydrate conjugates		C16H18N2O6	-H2O+H	317.113	0.998577	0.964151	0.993422	0.956446	3.91231	9.24062e-11	5.18278e-10	-0.144837	0.904481	668090	738644	pos
198	198-1	HMDB0000385	12a-Hydroxy-3-oxocholadienic acid	Lipids and lipid-like molecules	Steroids and steroid derivatives	Bile acids, alcohols and derivatives		C24H34O4	-H2O+H	369.242	0.997922	0.913814	0.979009	0.892774	3.69265	7.85455e-19	2.17122e-17	-0.188312	0.877632	288868	329144	pos
198	198-2	HMDB0012867	9'-Carboxy-alpha-tocotrienol	Lipids and lipid-like molecules	Prenol lipids	Monoterpenoids		C24H34O4	-H2O+H	369.242	0.997922	0.913814	0.979009	0.892774	3.69265	7.85455e-19	2.17122e-17	-0.188312	0.877632	288868	329144	pos
196	196-1	HMDB0014928	Perindopril	Organic acids and derivatives	Carboxylic acids and derivatives	Amino acids, peptides, and analogues	C07706	C19H32N2O5	+H	369.238	0.998125	0.944206	0.994894	0.937623	3.60881	4.67942e-14	4.0243e-13	-0.169828	0.888949	378122	425359	pos
227	227-1	HMDB0000308	3b-Hydroxy-5-cholenoic acid	Lipids and lipid-like molecules	Steroids and steroid derivatives	Bile acids, alcohols and derivatives		C24H38O3	+Na	397.271	0.99774	0.909734	0.980385	0.889874	3.52172	1.3493e-19	4.35151e-18	-0.2024	0.869104	249404	286967	pos
39	39-1	HMDB0000062	L-Carnitine	Organic nitrogen compounds	Organonitrogen compounds	Quaternary ammonium salts	C00318	C7H15NO3	+H	162.112	0.99787	0.967027	0.998066	0.963101	3.43592	1.13778e-05	3.60918e-05	-0.229214	0.8531	353489	414358	pos
229	229-1	HMDB0012516	11'-Carboxy-alpha-tocotrienol	Lipids and lipid-like molecules	Prenol lipids	Sesquiterpenoids		C26H38O4	-H2O+H	397.274	0.997919	0.795871	0.975726	0.774935	3.26698	1.00913e-17	2.16964e-16	-0.186478	0.878749	229723	261420	pos
229	229-2	HMDB0030041	Lupulone	Organic oxygen compounds	Organooxygen compounds	Carbonyl compounds	C10706	C26H38O4	-H2O+H	397.274	0.997919	0.795871	0.975726	0.774935	3.26698	1.00913e-17	2.16964e-16	-0.186478	0.878749	229723	261420	pos
229	229-3	HMDB0030140	Adlupulone	Organic oxygen compounds	Organooxygen compounds	Carbonyl compounds		C26H38O4	-H2O+H	397.274	0.997919	0.795871	0.975726	0.774935	3.26698	1.00913e-17	2.16964e-16	-0.186478	0.878749	229723	261420	pos
228	228-1	HMDB0062325	1-hexadecyl-glycero-3-phosphate	Lipids and lipid-like molecules	Glycerophospholipids	Glycerophosphates		C19H41O6P	+H	397.271	0.997782	0.91488	0.99316	0.906607	3.17049	3.56194e-10	1.81378e-09	-0.1657	0.891496	294217	330026	pos
25	25-1	HMDB0002334	Benzoquinoneacetic acid	Organic oxygen compounds	Organooxygen compounds	Carbonyl compounds		C8H6O4	-H2O+H	149.023	0.997041	0.97686	0.998473	0.972483	2.88913	0.000171954	0.000410779	-0.102659	0.931315	807331	866872	pos
25	25-2	HMDB0002428	Terephthalic acid	Benzenoids	Benzene and substituted derivatives	Benzoic acids and derivatives	C06337	C8H6O4	-H2O+H	149.023	0.997041	0.97686	0.998473	0.972483	2.88913	0.000171954	0.000410779	-0.102659	0.931315	807331	866872	pos
25	25-3	HMDB0032613	3,4-Methylenedioxybenzoic acid	Organoheterocyclic compounds	Benzodioxoles			C8H6O4	-H2O+H	149.023	0.997041	0.97686	0.998473	0.972483	2.88913	0.000171954	0.000410779	-0.102659	0.931315	807331	866872	pos
125	125-1	HMDB0039376	Methyl dihydrophaseate	Lipids and lipid-like molecules	Prenol lipids	Sesquiterpenoids		C16H24O5	-H2O+H	279.159	0.99702	0.980668	0.998683	0.976457	2.61952	5.74324e-05	0.00015435	-0.110426	0.926315	574984	620722	pos
125	125-2	HMDB0041551	3,8-Dihydroxy-6-methoxy-7(11)-eremophilen-12,8-olide	Lipids and lipid-like molecules	Prenol lipids	Terpene lactones		C16H24O5	-H2O+H	279.159	0.99702	0.980668	0.998683	0.976457	2.61952	5.74324e-05	0.00015435	-0.110426	0.926315	574984	620722	pos
95	95-1	HMDB0000387	3-Hydroxydodecanoic acid	Organic acids and derivatives	Hydroxy acids and derivatives	Medium-chain hydroxy acids and derivatives		C12H24O3	+Na	239.162	0.99887	0.925865	0.994245	0.919496	2.55734	4.53211e-07	1.73656e-06	0.223922	1.1679	236723	202690	pos
95	95-2	HMDB0002059	12-Hydroxydodecanoic acid	Organic acids and derivatives	Hydroxy acids and derivatives	Medium-chain hydroxy acids and derivatives	C08317	C12H24O3	+Na	239.162	0.99887	0.925865	0.994245	0.919496	2.55734	4.53211e-07	1.73656e-06	0.223922	1.1679	236723	202690	pos
95	95-3	HMDB0010728	(R)-3-Hydroxydodecanoic acid	Organic acids and derivatives	Hydroxy acids and derivatives	Medium-chain hydroxy acids and derivatives		C12H24O3	+Na	239.162	0.99887	0.925865	0.994245	0.919496	2.55734	4.53211e-07	1.73656e-06	0.223922	1.1679	236723	202690	pos
95	95-4	HMDB0040169	xi-5-Hydroxydodecanoic acid	Lipids and lipid-like molecules	Fatty Acyls	Fatty acids and conjugates		C12H24O3	+Na	239.162	0.99887	0.925865	0.994245	0.919496	2.55734	4.53211e-07	1.73656e-06	0.223922	1.1679	236723	202690	pos
150	150-1	HMDB0001016	D-4'-Phosphopantothenate	Organic acids and derivatives	Carboxylic acids and derivatives	Amino acids, peptides, and analogues	C03492	C9H18NO8P	+NH4	317.111	0.998371	0.80313	0.965417	0.774092	2.34364	2.64221e-11	1.62307e-10	-0.17046	0.888559	186373	209747	pos
161	161-1	HMDB0029497	Dimethyl fukiic acid	Benzenoids	Phenols	Benzenediols		C13H16O8	+NH4	318.118	0.998579	0.874007	0.976363	0.852136	2.26684	1.35284e-15	1.68887e-14	-0.174652	0.885981	138532	156360	pos
161	161-2	HMDB0041271	Salicylic acid beta-D-glucoside	Organic oxygen compounds	Organooxygen compounds	Carbohydrates and carbohydrate conjugates		C13H16O8	+NH4	318.118	0.998579	0.874007	0.976363	0.852136	2.26684	1.35284e-15	1.68887e-14	-0.174652	0.885981	138532	156360	pos
161	161-3	HMDB0240458	4-Methylcatechol 1-glucuronide					C13H16O8	+NH4	318.118	0.998579	0.874007	0.976363	0.852136	2.26684	1.35284e-15	1.68887e-14	-0.174652	0.885981	138532	156360	pos
161	161-4	HMDB0240460	4-Methylcatechol 2-glucuronide					C13H16O8	+NH4	318.118	0.998579	0.874007	0.976363	0.852136	2.26684	1.35284e-15	1.68887e-14	-0.174652	0.885981	138532	156360	pos
124	124-1	HMDB0030993	5-Nonyltetrahydro-2-oxo-3-furancarboxylic acid	Organoheterocyclic compounds	Lactones	Gamma butyrolactones		C14H24O4	+Na	279.157	0.997239	0.86353	0.998432	0.859795	2.07558	5.73129e-05	0.00015435	-0.115273	0.923208	347941	376883	pos
124	124-2	HMDB0036143	Monomenthyl succinate	Lipids and lipid-like molecules	Prenol lipids	Monoterpenoids		C14H24O4	+Na	279.157	0.997239	0.86353	0.998432	0.859795	2.07558	5.73129e-05	0.00015435	-0.115273	0.923208	347941	376883	pos
155	155-1	HMDB0002044	8-Hydroxyguanosine	Nucleosides, nucleotides, and analogues	Purine nucleosides			C10H13N5O6	+NH4	317.12	0.998206	0.796591	0.748283	0.595006	1.94301	1.89692e-15	2.22457e-14	-0.173469	0.886708	98384.6	110955	pos
1	1-1	HMDB0000925	Trimethylamine N-oxide	Organic nitrogen compounds	Organonitrogen compounds	Aminoxides	C01104	C3H9NO	+H	76.0757	0.997912	0.723955	0.994991	0.718825	1.92554	5.34287e-23	2.58461e-21	0.964519	1.95141	20995.6	10759.2	pos
1	1-2	HMDB0012136	1-Amino-propan-2-ol	Organic nitrogen compounds	Organonitrogen compounds	Amines	C05771	C3H9NO	+H	76.0757	0.997912	0.723955	0.994991	0.718825	1.92554	5.34287e-23	2.58461e-21	0.964519	1.95141	20995.6	10759.2	pos
33	33-1	HMDB0000883	L-Valine	Organic acids and derivatives	Carboxylic acids and derivatives	Amino acids, peptides, and analogues	C00183	C5H11NO2	+K	156.042	0.997763	0.757715	0.988855	0.747594	1.87776	3.8418e-15	4.01831e-14	-0.468347	0.722792	26555	36739.5	pos
33	33-2	HMDB0002141	N-Methyl-a-aminoisobutyric acid	Organic acids and derivatives	Carboxylic acids and derivatives	Amino acids, peptides, and analogues		C5H11NO2	+K	156.042	0.997763	0.757715	0.988855	0.747594	1.87776	3.8418e-15	4.01831e-14	-0.468347	0.722792	26555	36739.5	pos
33	33-3	HMDB0003355	5-Aminopentanoic acid	Organic acids and derivatives	Carboxylic acids and derivatives	Amino acids, peptides, and analogues	C00431	C5H11NO2	+K	156.042	0.997763	0.757715	0.988855	0.747594	1.87776	3.8418e-15	4.01831e-14	-0.468347	0.722792	26555	36739.5	pos
33	33-4	HMDB0013716	Norvaline	Organic acids and derivatives	Carboxylic acids and derivatives	Amino acids, peptides, and analogues	C01799	C5H11NO2	+K	156.042	0.997763	0.757715	0.988855	0.747594	1.87776	3.8418e-15	4.01831e-14	-0.468347	0.722792	26555	36739.5	pos
96	96-1	HMDB0038256	Geranyl acetoacetate	Lipids and lipid-like molecules	Fatty Acyls	Fatty alcohol esters		C14H22O3	+H	239.164	0.998763	0.767927	0.979092	0.750942	1.85001	2.93882e-07	1.14881e-06	0.22417	1.1681	129445	110816	pos
162	162-1	HMDB0015228	Oxamniquine	Organoheterocyclic compounds	Quinolines and derivatives	Nitroquinolines and derivatives	C07341	C14H21N3O3	+K	318.122	0.998327	0.820341	0.970556	0.794854	1.74309	7.19285e-16	9.59873e-15	-0.171002	0.888226	80528.4	90662.1	pos
31	31-1	HMDB0004094	Indoxyl	Organoheterocyclic compounds	Indoles and derivatives	Hydroxyindoles	C05658	C8H7NO	+Na	156.042	0.997571	0.691055	0.984935	0.678991	1.65692	5.02056e-14	4.22382e-13	-0.447714	0.733204	22760.7	31042.7	pos
31	31-2	HMDB0029757	4-Hydroxybenzeneacetonitrile	Benzenoids	Benzene and substituted derivatives	Benzyl cyanides	C03766	C8H7NO	+Na	156.042	0.997571	0.691055	0.984935	0.678991	1.65692	5.02056e-14	4.22382e-13	-0.447714	0.733204	22760.7	31042.7	pos
31	31-3	HMDB0032390	2-Methyl-4,5-benzoxazole	Organoheterocyclic compounds	Benzoxazoles			C8H7NO	+Na	156.042	0.997571	0.691055	0.984935	0.678991	1.65692	5.02056e-14	4.22382e-13	-0.447714	0.733204	22760.7	31042.7	pos
77	77-1	HMDB0035095	7-Ethoxy-4-methyl-2H-1-benzopyran-2-one	Phenylpropanoids and polyketides	Coumarins and derivatives			C12H12O3	+H	205.086	0.997008	0.951838	0.997867	0.946966	1.61452	8.85421e-05	0.000225433	-0.105391	0.929553	230502	247971	pos
52	52-1	HMDB0004816	FAPy-adenine	Organoheterocyclic compounds	Diazines	Pyrimidines and pyrimidine derivatives	C06502	C5H7N5O	+NH4	171.099	0.998789	0.57428	0.990977	0.568408	1.55988	8.9332e-07	3.35646e-06	0.219218	1.1641	78158.1	67140.2	pos
78	78-1	HMDB0015145	Edrophonium	Benzenoids	Benzene and substituted derivatives	Aniline and substituted anilines	C06976	C10H16NO	+K	205.086	0.997012	0.560344	0.975553	0.545012	1.47745	2.16045e-05	6.53197e-05	-0.114478	0.923716	172417	186655	pos
200	200-1	HMDB0015092	Norgestimate	Lipids and lipid-like molecules	Steroids and steroid derivatives	Steroid esters		C23H31NO3	+H	370.238	0.998054	0.836383	0.821272	0.685561	1.46836	2.88492e-18	6.56743e-17	-0.193447	0.874514	45781.3	52350.6	pos
231	231-1	HMDB0015073	Salmeterol	Benzenoids	Benzene and substituted derivatives	Benzyl alcohols	C07241	C25H37NO4	-H2O+H	398.269	0.998108	0.808286	0.938793	0.757378	1.44051	1.34522e-17	2.73999e-16	-0.19191	0.875446	46158	52725.2	pos
165	165-1	HMDB0033927	3-Hydroxymugineic acid	Organic acids and derivatives	Carboxylic acids and derivatives	Amino acids, peptides, and analogues		C12H20N2O9	-H2O+H	319.114	0.998463	0.792373	0.983728	0.778281	1.43283	1.61912e-15	1.95813e-14	-0.174954	0.885796	54923.5	62004.6	pos
126	126-1	HMDB0240241	Thenyldiamine	Organic nitrogen compounds	Organonitrogen compounds	Amines		C14H19N3S	+NH4	279.164	0.997139	0.856265	0.981749	0.838232	1.41204	0.000349996	0.00081107	-0.0997609	0.933188	192636	206428	pos
11	11-1	HMDB0031598	2,3-Pentanedione	Organic oxygen compounds	Organooxygen compounds	Carbonyl compounds		C5H8O2	+NH4	118.086	0.998053	0.613401	0.991534	0.607024	1.33569	2.44583e-15	2.78393e-14	-0.351613	0.783707	19657.2	25082.3	pos
11	11-2	HMDB0031648	2,4-Pentanedione	Organic oxygen compounds	Organooxygen compounds	Carbonyl compounds	C15499	C5H8O2	+NH4	118.086	0.998053	0.613401	0.991534	0.607024	1.33569	2.44583e-15	2.78393e-14	-0.351613	0.783707	19657.2	25082.3	pos
195	195-1	HMDB0014708	Cinnarizine	Benzenoids	Benzene and substituted derivatives	Diphenylmethanes		C26H28N2	+H	369.233	0.99821	0.96426	0.833129	0.801915	1.33032	4.72924e-15	4.69286e-14	-0.262126	0.833858	36785.7	44115.1	pos
179	179-1	HMDB0011533	MG(16:0)	Lipids and lipid-like molecules	Glycerolipids	Monoradylglycerols		C19H38O4	+H	331.284	0.996687	0.968973	0.99798	0.963812	1.297	0.000698169	0.00155282	-0.134921	0.91072	136392	149763	pos
128	128-1	HMDB0014965	Cinoxacin	Organoheterocyclic compounds	Diazanaphthalenes	Benzodiazines	C08052	C12H10N2O5	+NH4	280.093	0.997789	0.802262	0.979366	0.783971	1.29259	1.43028e-10	7.68776e-10	0.285373	1.21873	31727	26032.9	pos
66	66-1	HMDB0001855	5-Hydroxytryptophol	Organoheterocyclic compounds	Indoles and derivatives	Hydroxyindoles		C10H11NO2	+Na	200.068	0.997572	0.766417	0.992193	0.758588	1.24178	1.00031e-07	4.03249e-07	-0.309304	0.807031	31383	38887	pos
149	149-1	HMDB0000594	gamma-Glutamylphenylalanine	Organic acids and derivatives	Carboxylic acids and derivatives	Amino acids, peptides, and analogues		C14H18N2O5	+Na	317.111	0.998262	0.730493	0.974962	0.710965	1.23919	4.51446e-11	2.6076e-10	-0.174685	0.885961	52118.2	58826.8	pos
149	149-2	HMDB0029106	​Tyrosylhydroxyproline	Organic acids and derivatives	Carboxylic acids and derivatives	Amino acids, peptides, and analogues		C14H18N2O5	+Na	317.111	0.998262	0.730493	0.974962	0.710965	1.23919	4.51446e-11	2.6076e-10	-0.174685	0.885961	52118.2	58826.8	pos
3	3-1	HMDB0001080	4-Aminobutyraldehyde	Organic oxygen compounds	Organooxygen compounds	Carbonyl compounds	C02903	C4H9NO	+H	88.0757	0.997855	0.649646	0.900112	0.5835	1.20742	2.04389e-08	8.59765e-08	-0.198057	0.871724	35258.8	40447.2	pos
3	3-2	HMDB0031215	N-Ethylacetamide	Organic acids and derivatives	Carboximidic acids and derivatives	Carboximidic acids		C4H9NO	+H	88.0757	0.997855	0.649646	0.900112	0.5835	1.20742	2.04389e-08	8.59765e-08	-0.198057	0.871724	35258.8	40447.2	pos
3	3-3	HMDB0031581	Morpholine	Organoheterocyclic compounds	Oxazinanes	Morpholines	C14452	C4H9NO	+H	88.0757	0.997855	0.649646	0.900112	0.5835	1.20742	2.04389e-08	8.59765e-08	-0.198057	0.871724	35258.8	40447.2	pos
3	3-4	HMDB0033870	Butyramide	Lipids and lipid-like molecules	Fatty Acyls	Fatty amides		C4H9NO	+H	88.0757	0.997855	0.649646	0.900112	0.5835	1.20742	2.04389e-08	8.59765e-08	-0.198057	0.871724	35258.8	40447.2	pos
201	201-1	HMDB0002226	Adrenic acid	Lipids and lipid-like molecules	Fatty Acyls	Fatty acids and conjugates	C16527	C22H36O2	+K	371.235	0.998048	0.535708	0.959026	0.512755	1.09491	2.24115e-18	5.42078e-17	-0.187047	0.878402	26602	30284.5	pos
201	201-2	HMDB0035676	1-Hydroxy-1-phenyl-3-hexadecanone	Lipids and lipid-like molecules	Fatty Acyls	Fatty alcohols		C22H36O2	+K	371.235	0.998048	0.535708	0.959026	0.512755	1.09491	2.24115e-18	5.42078e-17	-0.187047	0.878402	26602	30284.5	pos
201	201-3	HMDB0035677	3-Hydroxy-1-phenyl-1-hexadecanone	Lipids and lipid-like molecules	Fatty Acyls	Fatty alcohols		C22H36O2	+K	371.235	0.998048	0.535708	0.959026	0.512755	1.09491	2.24115e-18	5.42078e-17	-0.187047	0.878402	26602	30284.5	pos
201	201-4	HMDB0062725	Ethyl Arachidonate	Lipids and lipid-like molecules	Fatty Acyls	Fatty acid esters		C22H36O2	+K	371.235	0.998048	0.535708	0.959026	0.512755	1.09491	2.24115e-18	5.42078e-17	-0.187047	0.878402	26602	30284.5	pos
120	120-1	HMDB0000220	Palmitic acid	Lipids and lipid-like molecules	Fatty Acyls	Fatty acids and conjugates	C00249	C16H32O2	+NH4	274.274	0.997657	0.820486	0.994274	0.813876	1.08126	1.42755e-11	8.91065e-11	-0.134533	0.910964	50938	55916.6	pos
120	120-2	HMDB0002396	Trimethyltridecanoic acid	Lipids and lipid-like molecules	Prenol lipids	Sesquiterpenoids		C16H32O2	+NH4	274.274	0.997657	0.820486	0.994274	0.813876	1.08126	1.42755e-11	8.91065e-11	-0.134533	0.910964	50938	55916.6	pos
120	120-3	HMDB0031068	Isopalmitic acid	Lipids and lipid-like molecules	Fatty Acyls	Fatty acids and conjugates		C16H32O2	+NH4	274.274	0.997657	0.820486	0.994274	0.813876	1.08126	1.42755e-11	8.91065e-11	-0.134533	0.910964	50938	55916.6	pos
120	120-4	HMDB0032065	Butyl dodecanoate	Lipids and lipid-like molecules	Fatty Acyls	Fatty acid esters		C16H32O2	+NH4	274.274	0.997657	0.820486	0.994274	0.813876	1.08126	1.42755e-11	8.91065e-11	-0.134533	0.910964	50938	55916.6	pos
120	120-5	HMDB0032249	Dodecyl butyrate	Lipids and lipid-like molecules	Fatty Acyls	Fatty alcohol esters		C16H32O2	+NH4	274.274	0.997657	0.820486	0.994274	0.813876	1.08126	1.42755e-11	8.91065e-11	-0.134533	0.910964	50938	55916.6	pos
120	120-6	HMDB0032324	Hexyl decanoate	Lipids and lipid-like molecules	Fatty Acyls	Fatty acid esters		C16H32O2	+NH4	274.274	0.997657	0.820486	0.994274	0.813876	1.08126	1.42755e-11	8.91065e-11	-0.134533	0.910964	50938	55916.6	pos
120	120-7	HMDB0033166	Octyl octanoate	Lipids and lipid-like molecules	Fatty Acyls	Fatty alcohol esters		C16H32O2	+NH4	274.274	0.997657	0.820486	0.994274	0.813876	1.08126	1.42755e-11	8.91065e-11	-0.134533	0.910964	50938	55916.6	pos
120	120-8	HMDB0034153	Ethyl tetradecanoate	Lipids and lipid-like molecules	Fatty Acyls	Fatty acid esters		C16H32O2	+NH4	274.274	0.997657	0.820486	0.994274	0.813876	1.08126	1.42755e-11	8.91065e-11	-0.134533	0.910964	50938	55916.6	pos
120	120-9	HMDB0036210	Dodecyl 2-methylpropanoate	Lipids and lipid-like molecules	Fatty Acyls	Fatty alcohol esters		C16H32O2	+NH4	274.274	0.997657	0.820486	0.994274	0.813876	1.08126	1.42755e-11	8.91065e-11	-0.134533	0.910964	50938	55916.6	pos
104	104-1	HMDB0030813	Cassiachromone	Organoheterocyclic compounds	Benzopyrans	1-benzopyrans		C13H12O4	+Na	255.063	0.998335	0.695907	0.984034	0.683656	1.06731	1.17885e-16	1.9009e-15	-0.186185	0.878927	26270.9	29889.8	pos
104	104-2	HMDB0033330	Dihydrocoriandrin	Organoheterocyclic compounds	Benzopyrans	2-benzopyrans		C13H12O4	+Na	255.063	0.998335	0.695907	0.984034	0.683656	1.06731	1.17885e-16	1.9009e-15	-0.186185	0.878927	26270.9	29889.8	pos
104	104-3	HMDB0038911	(2S,3S,4S)-5,7,9,11-Tridecatetrayne-1,2,3,4-tetrol	Lipids and lipid-like molecules	Fatty Acyls	Fatty alcohols		C13H12O4	+Na	255.063	0.998335	0.695907	0.984034	0.683656	1.06731	1.17885e-16	1.9009e-15	-0.186185	0.878927	26270.9	29889.8	pos
104	104-4	HMDB0041325	Salfredin B11	Organoheterocyclic compounds	Benzopyrans	1-benzopyrans		C13H12O4	+Na	255.063	0.998335	0.695907	0.984034	0.683656	1.06731	1.17885e-16	1.9009e-15	-0.186185	0.878927	26270.9	29889.8	pos
192	192-1	HMDB0011131	MG(18:0)	Lipids and lipid-like molecules	Glycerolipids	Monoradylglycerols		C21H42O4	+H	359.316	0.996584	0.949637	0.996587	0.943162	1.05921	0.00122804	0.00250133	-0.131516	0.912871	98039.6	107397	pos
131	131-1	HMDB0011177	Phenylalanylproline	Organic acids and derivatives	Carboxylic acids and derivatives	Amino acids, peptides, and analogues		C14H18N2O3	+NH4	280.166	0.997136	0.834376	0.952063	0.792104	1.03289	9.51925e-05	0.000237839	-0.106559	0.928801	91901.3	98946.2	pos
131	131-2	HMDB0011179	Prolylphenylalanine	Organic acids and derivatives	Carboxylic acids and derivatives	Amino acids, peptides, and analogues		C14H18N2O3	+NH4	280.166	0.997136	0.834376	0.952063	0.792104	1.03289	9.51925e-05	0.000237839	-0.106559	0.928801	91901.3	98946.2	pos
164	164-1	HMDB0033295	7-(4-Hydroxyphenyl)-1-phenyl-4-hepten-3-one	Phenylpropanoids and polyketides	Diarylheptanoids	Linear diarylheptanoids		C19H20O2	+K	319.11	0.99858	0.631464	0.974792	0.614671	1.02547	1.21174e-12	8.37402e-12	-0.182958	0.880895	28958.7	32874.2	pos
73	73-1	HMDB0000201	L-Acetylcarnitine	Lipids and lipid-like molecules	Fatty Acyls	Fatty acid esters	C02571	C9H17NO4	+H	204.123	0.997822	0.918454	0.991243	0.908428	1.00822	0.0333004	0.0486312	-0.118762	0.920978	102305	111083	pos
12	12-1	HMDB0033971	2-Diethylaminoethanol	Organic nitrogen compounds	Organonitrogen compounds	Amines		C6H15NO	+H	118.123	0.997385	0.74047	0.997364	0.736587	1.00182	2.0137e-07	7.95206e-07	-0.105576	0.929434	65345.6	70306.9	pos
