# Supplementary material for: Spatial Resolved Metabolomics via AFADESI-MSI Reveals Lipid Metabolic Alterations in Aging Lungs
Source: Research Square preprint supplement (doi:10.21203/rs.3.rs-7113832/v1), 2025-07-28
Supplement: Supplementary file 5 [file d7ba452264d64c017b5cd616.xlsx]

## Sheet: neg
Table S1 The spatial distribution of obtained metabolite negative ions
ID	ID-num	HMDB	Metabolites	Super Class	Class	Sub Class	KEGG	Formula	Adduct	mz	moc	spec	spat	msm
1	1-1	HMDB0000190	L-Lactic acid	Organic acids and derivatives	Hydroxy acids and derivatives	Alpha hydroxy acids and derivatives	C00186	C3H6O3	-H	89.0244	0.998585	0.573783	0.993181	0.569064
1	1-2	HMDB0000700	Hydroxypropionic acid	Organic acids and derivatives	Hydroxy acids and derivatives	Beta hydroxy acids and derivatives	C01013	C3H6O3	-H	89.0244	0.998585	0.573783	0.993181	0.569064
1	1-3	HMDB0001311	D-Lactic acid	Organic acids and derivatives	Hydroxy acids and derivatives	Alpha hydroxy acids and derivatives	C00256	C3H6O3	-H	89.0244	0.998585	0.573783	0.993181	0.569064
1	1-4	HMDB0031232	Monoethyl carbonate	Organic acids and derivatives	Organic carbonic acids and derivatives	Carbonic acid monoesters		C3H6O3	-H	89.0244	0.998585	0.573783	0.993181	0.569064
1	1-5	HMDB0041929	Methoxyacetic acid	Organic acids and derivatives	Carboxylic acids and derivatives	Carboxylic acids		C3H6O3	-H	89.0244	0.998585	0.573783	0.993181	0.569064
2	2-1	HMDB0001448	Sulfate	Homogeneous non-metal compounds	Non-metal oxoanionic compounds	Non-metal sulfates	C00059	H2O4S	-H	96.9601	0.999129	0.606414	0.991286	0.600606
3	3-1	HMDB0029596	Chloroform	Organohalogen compounds	Alkyl halides	Halomethanes	C13827	CHCl3	-H	116.907	0.99752	0.93309	0.978716	0.910966
4	4-1	HMDB0061928	Trifluoromethyl-bismethyl ketone	Organic oxygen compounds	Organooxygen compounds	Carbonyl compounds		C5H7F3O	-H2O-H	121.027	0.997793	0.894318	0.996354	0.889091
5	5-1	HMDB0031598	2,3-Pentanedione	Organic oxygen compounds	Organooxygen compounds	Carbonyl compounds		C5H8O2	+Na-2H	121.027	0.997849	0.861765	0.994783	0.855426
5	5-2	HMDB0031648	2,4-Pentanedione	Organic oxygen compounds	Organooxygen compounds	Carbonyl compounds	C15499	C5H8O2	+Na-2H	121.027	0.997849	0.861765	0.994783	0.855426
6	6-1	HMDB0001870	Benzoic acid	Benzenoids	Benzene and substituted derivatives	Benzoic acids and derivatives	C00539	C7H6O2	-H	121.03	0.9978	0.820007	0.997005	0.815752
6	6-2	HMDB0011718	4-Hydroxybenzaldehyde	Organic oxygen compounds	Organooxygen compounds	Carbonyl compounds	C00633	C7H6O2	-H	121.03	0.9978	0.820007	0.997005	0.815752
7	7-1	HMDB0000251	Taurine	Organic acids and derivatives	Organic sulfonic acids and derivatives	Organosulfonic acids and derivatives	C00245	C2H7NO3S	-H	124.007	0.998776	0.883862	0.996908	0.880051
8	8-1	HMDB0000191	L-Aspartic acid	Organic acids and derivatives	Carboxylic acids and derivatives	Amino acids, peptides, and analogues	C00049	C4H7NO4	-H	132.03	0.998599	0.640878	0.990108	0.633649
8	8-2	HMDB0006483	D-Aspartic acid	Organic acids and derivatives	Carboxylic acids and derivatives	Amino acids, peptides, and analogues	C00402	C4H7NO4	-H	132.03	0.998599	0.640878	0.990108	0.633649
9	9-1	HMDB0000148	L-Glutamic acid	Organic acids and derivatives	Carboxylic acids and derivatives	Amino acids, peptides, and analogues	C00025	C5H9NO4	-H	146.046	0.998757	0.804648	0.994962	0.799599
9	9-2	HMDB0002931	N-Acetylserine	Organic acids and derivatives	Carboxylic acids and derivatives	Amino acids, peptides, and analogues		C5H9NO4	-H	146.046	0.998757	0.804648	0.994962	0.799599
9	9-3	HMDB0003339	D-Glutamic acid	Organic acids and derivatives	Carboxylic acids and derivatives	Amino acids, peptides, and analogues	C00217	C5H9NO4	-H	146.046	0.998757	0.804648	0.994962	0.799599
9	9-4	HMDB0006556	L-4-Hydroxyglutamate semialdehyde	Organic acids and derivatives	Carboxylic acids and derivatives	Amino acids, peptides, and analogues	C05938	C5H9NO4	-H	146.046	0.998757	0.804648	0.994962	0.799599
10	10-1	HMDB0000897	7-Methylguanine	Organoheterocyclic compounds	Imidazopyrimidines	Purines and purine derivatives	C02242	C6H7N5O	-H2O-H	146.047	0.998858	0.667958	0.993289	0.662718
11	11-1	HMDB0042048	Trichloroacetic acid	Organic acids and derivatives	Carboxylic acids and derivatives	Alpha-halocarboxylic acids and derivatives	C11150	C2HCl3O2	-H	160.897	0.997281	0.839983	0.980786	0.821603
12	12-1	HMDB0011620	Arsenite	Mixed metal/non-metal compounds	Miscellaneous mixed metal/non-metals	Miscellaneous metallic oxoanionic compounds		AsH3O3	+Cl	160.898	0.997092	0.832484	0.866516	0.719263
13	13-1	HMDB0062574	N(tele)-methylhistaminium	Organic nitrogen compounds	Organonitrogen compounds	Amines		C6H12N3	+HCOO	171.101	0.997856	0.545286	0.988691	0.537963
14	14-1	HMDB0036188	Tetrahydrofurfuryl butyrate	Lipids and lipid-like molecules	Fatty Acyls	Fatty acid esters		C9H16O3	-H	171.103	0.997925	0.563209	0.978776	0.550111
14	14-2	HMDB0094711	9-Oxo-nonanoic acid	Lipids and lipid-like molecules	Fatty Acyls	Fatty acids and conjugates	C16322	C9H16O3	-H	171.103	0.997925	0.563209	0.978776	0.550111
15	15-1	HMDB0001253	5,6-Dihydroxyindole-2-carboxylic acid	Organoheterocyclic compounds	Indoles and derivatives	Indolecarboxylic acids and derivatives	C04185	C9H7NO4	-H2O-H	174.02	0.996541	0.605662	0.524579	0.316619
15	15-2	HMDB0001430	L-Dopachrome	Organic acids and derivatives	Carboxylic acids and derivatives	Amino acids, peptides, and analogues	C01693	C9H7NO4	-H2O-H	174.02	0.996541	0.605662	0.524579	0.316619
15	15-3	HMDB0011622	D-Dopachrome	Organic acids and derivatives	Carboxylic acids and derivatives	Amino acids, peptides, and analogues	C15566	C9H7NO4	-H2O-H	174.02	0.996541	0.605662	0.524579	0.316619
16	16-1	HMDB0041503	Bis(2-furanylmethyl) sulfide	Organoheterocyclic compounds	Heteroaromatic compounds			C10H10O2S	-H2O-H	175.022	0.997719	0.639419	0.975636	0.622417
17	17-1	HMDB0000044	Ascorbic acid	Organoheterocyclic compounds	Dihydrofurans	Furanones	C01041	C6H8O6	-H	175.025	0.997783	0.943167	0.995246	0.936602
17	17-2	HMDB0006355	D-Glucurono-6,3-lactone	Organoheterocyclic compounds	Furofurans	Isosorbides	C02670	C6H8O6	-H	175.025	0.997783	0.943167	0.995246	0.936602
17	17-3	HMDB0031193	1,2,3-Propanetricarboxylic acid	Organic acids and derivatives	Carboxylic acids and derivatives	Tricarboxylic acids and derivatives	C19806	C6H8O6	-H	175.025	0.997783	0.943167	0.995246	0.936602
18	18-1	HMDB0033245	6-(Hydroxymethyl)-2,4(1H,3H)-pteridinedione	Organoheterocyclic compounds	Pteridines and derivatives			C7H6N4O3	-H2O-H	175.026	0.99797	0.769595	0.99245	0.762234
19	19-1	HMDB0012931	Dopachrome o-semiquinone	Organoheterocyclic compounds	Indoles and derivatives	Indolecarboxylic acids and derivatives		C9H8NO4	-H2O-H	175.028	0.998024	0.822086	0.882991	0.72446
20	20-1	HMDB0014991	Temozolomide	Organoheterocyclic compounds	Imidazotetrazines			C6H6N6O2	+Na-2H	215.03	0.998139	0.582662	0.985771	0.573303
21	21-1	HMDB0000122	D-Glucose	Organic oxygen compounds	Organooxygen compounds	Carbohydrates and carbohydrate conjugates	C00221	C6H12O6	+Cl	215.032	0.99815	0.901364	0.985677	0.88681
21	21-2	HMDB0000143	D-Galactose	Organic oxygen compounds	Organooxygen compounds	Carbohydrates and carbohydrate conjugates	C00984	C6H12O6	+Cl	215.032	0.99815	0.901364	0.985677	0.88681
21	21-3	HMDB0000169	D-Mannose	Organic oxygen compounds	Organooxygen compounds	Carbohydrates and carbohydrate conjugates	C00936	C6H12O6	+Cl	215.032	0.99815	0.901364	0.985677	0.88681
21	21-4	HMDB0000660	D-Fructose	Organic oxygen compounds	Organooxygen compounds	Carbohydrates and carbohydrate conjugates	C02336	C6H12O6	+Cl	215.032	0.99815	0.901364	0.985677	0.88681
21	21-5	HMDB0001151	Allose	Organic oxygen compounds	Organooxygen compounds	Carbohydrates and carbohydrate conjugates	C01487	C6H12O6	+Cl	215.032	0.99815	0.901364	0.985677	0.88681
21	21-6	HMDB0001266	L-Sorbose	Organic oxygen compounds	Organooxygen compounds	Carbohydrates and carbohydrate conjugates	C08356	C6H12O6	+Cl	215.032	0.99815	0.901364	0.985677	0.88681
21	21-7	HMDB0003345	alpha-D-Glucose	Organic oxygen compounds	Organooxygen compounds	Carbohydrates and carbohydrate conjugates	C00267	C6H12O6	+Cl	215.032	0.99815	0.901364	0.985677	0.88681
21	21-8	HMDB0003449	beta-D-Galactose	Organic oxygen compounds	Organooxygen compounds	Carbohydrates and carbohydrate conjugates	C00962	C6H12O6	+Cl	215.032	0.99815	0.901364	0.985677	0.88681
22	22-1	HMDB0000954	Ferulic acid	Phenylpropanoids and polyketides	Cinnamic acids and derivatives	Hydroxycinnamic acids and derivatives	C01494	C10H10O4	+Na-2H	215.033	0.998204	0.743059	0.972273	0.721159
22	22-2	HMDB0029663	Vanillin acetate	Benzenoids	Phenol esters			C10H10O4	+Na-2H	215.033	0.998204	0.743059	0.972273	0.721159
22	22-3	HMDB0030765	(-)-trans-3,4-Dihydro-4,8-dihydroxy-3-methyl-1H-2-benzopyran-1-one	Organoheterocyclic compounds	Benzopyrans	2-benzopyrans		C10H10O4	+Na-2H	215.033	0.998204	0.743059	0.972273	0.721159
22	22-4	HMDB0032614	Piperonyl acetate	Organoheterocyclic compounds	Benzodioxoles			C10H10O4	+Na-2H	215.033	0.998204	0.743059	0.972273	0.721159
22	22-5	HMDB0032652	Meconine	Organoheterocyclic compounds	Isocoumarans	Isobenzofuranones		C10H10O4	+Na-2H	215.033	0.998204	0.743059	0.972273	0.721159
23	23-1	HMDB0001860	Paraxanthine	Organoheterocyclic compounds	Imidazopyrimidines	Purines and purine derivatives	C13747	C7H8N4O2	+Cl	215.033	0.998062	0.893576	0.975809	0.87027
23	23-2	HMDB0001889	Theophylline	Organoheterocyclic compounds	Imidazopyrimidines	Purines and purine derivatives	C07130	C7H8N4O2	+Cl	215.033	0.998062	0.893576	0.975809	0.87027
23	23-3	HMDB0002825	Theobromine	Organoheterocyclic compounds	Imidazopyrimidines	Purines and purine derivatives	C07480	C7H8N4O2	+Cl	215.033	0.998062	0.893576	0.975809	0.87027
24	24-1	HMDB0012883	Adrenochrome o-semiquinone	Organoheterocyclic compounds	Indoles and derivatives			C9H10NO3	+Cl	215.034	0.998195	0.85635	0.969579	0.8288
25	25-1	HMDB0014693	Methoxsalen	Phenylpropanoids and polyketides	Coumarins and derivatives	Furanocoumarins	C01864	C12H8O4	-H	215.035	0.998269	0.724026	0.9743	0.704197
25	25-2	HMDB0030637	Bergapten	Phenylpropanoids and polyketides	Coumarins and derivatives	Furanocoumarins	C01557	C12H8O4	-H	215.035	0.998269	0.724026	0.9743	0.704197
26	26-1	HMDB0002000	Myristoleic acid	Lipids and lipid-like molecules	Fatty Acyls	Fatty acids and conjugates	C08322	C14H26O2	-H	225.186	0.997484	0.68092	0.958238	0.650842
27	27-1	HMDB0033845	(Z)-5-[(5-Methyl-2-thienyl)methylene]-2(5H)-furanone	Organoheterocyclic compounds	Thiophenes	2,5-disubstituted thiophenes		C10H8O2S	+Cl	226.993	0.997404	0.677787	0.93993	0.635419
28	28-1	HMDB0060715	2-Hydroxy-4-trifluoromethyl benzoic acid	Benzenoids	Benzene and substituted derivatives	Benzoic acids and derivatives		C8H5F3O3	+Na-2H	226.994	0.997312	0.560922	0.975759	0.545854
29	29-1	HMDB0000094	Citric acid	Organic acids and derivatives	Carboxylic acids and derivatives	Tricarboxylic acids and derivatives	C00158	C6H8O7	+Cl	226.995	0.997272	0.81239	0.974659	0.789643
29	29-2	HMDB0000193	Isocitric acid	Organic acids and derivatives	Carboxylic acids and derivatives	Tricarboxylic acids and derivatives	C00311	C6H8O7	+Cl	226.995	0.997272	0.81239	0.974659	0.789643
29	29-3	HMDB0001874	D-threo-Isocitric acid	Organic acids and derivatives	Carboxylic acids and derivatives	Tricarboxylic acids and derivatives	C00451	C6H8O7	+Cl	226.995	0.997272	0.81239	0.974659	0.789643
29	29-4	HMDB0005971	Diketogulonic acid	Organic oxygen compounds	Organooxygen compounds	Carbohydrates and carbohydrate conjugates	C04575	C6H8O7	+Cl	226.995	0.997272	0.81239	0.974659	0.789643
29	29-5	HMDB0006511	2,3-Diketo-L-gulonate	Organic oxygen compounds	Organooxygen compounds	Carbohydrates and carbohydrate conjugates	C04575	C6H8O7	+Cl	226.995	0.997272	0.81239	0.974659	0.789643
29	29-6	HMDB0041862	D-Glucaro-1,4-lactone	Organoheterocyclic compounds	Lactones	Gamma butyrolactones		C6H8O7	+Cl	226.995	0.997272	0.81239	0.974659	0.789643
30	30-1	HMDB0034228	Thiolutin	Organic nitrogen compounds	Organonitrogen compounds	N-arylamides		C8H8N2O2S2	-H	226.995	0.997294	0.706406	0.949803	0.669131
31	31-1	HMDB0029735	5-Ethynyl-5'-(1-propynyl)-2,2'-bithiophene	Organoheterocyclic compounds	Bi- and oligothiophenes			C13H8S2	-H	226.999	0.997692	0.553452	0.793889	0.438365
32	32-1	HMDB0000806	Myristic acid	Lipids and lipid-like molecules	Fatty Acyls	Fatty acids and conjugates	C06424	C14H28O2	-H	227.202	0.997495	0.887614	0.996283	0.882099
32	32-2	HMDB0002221	2,6,10-Trimethylundecanoic acid	Lipids and lipid-like molecules	Fatty Acyls	Fatty acids and conjugates		C14H28O2	-H	227.202	0.997495	0.887614	0.996283	0.882099
32	32-3	HMDB0031072	12-Methyltridecanoic acid	Lipids and lipid-like molecules	Fatty Acyls	Fatty acids and conjugates		C14H28O2	-H	227.202	0.997495	0.887614	0.996283	0.882099
32	32-4	HMDB0032318	Hexanal octane-1,3-diol acetal	Organoheterocyclic compounds	Dioxanes	1,3-dioxanes		C14H28O2	-H	227.202	0.997495	0.887614	0.996283	0.882099
32	32-5	HMDB0032548	Undecanal propyleneglycol acetal	Organoheterocyclic compounds	Dioxolanes	1,3-dioxolanes		C14H28O2	-H	227.202	0.997495	0.887614	0.996283	0.882099
32	32-6	HMDB0033788	Ethyl dodecanoate	Lipids and lipid-like molecules	Fatty Acyls	Fatty acid esters		C14H28O2	-H	227.202	0.997495	0.887614	0.996283	0.882099
32	32-7	HMDB0034461	Heptyl heptanoate	Lipids and lipid-like molecules	Fatty Acyls	Fatty acid esters		C14H28O2	-H	227.202	0.997495	0.887614	0.996283	0.882099
32	32-8	HMDB0036216	Hexyl octanoate	Lipids and lipid-like molecules	Fatty Acyls	Fatty acid esters	C13798	C14H28O2	-H	227.202	0.997495	0.887614	0.996283	0.882099
32	32-9	HMDB0037312	Decyl butanoate	Lipids and lipid-like molecules	Fatty Acyls	Fatty alcohol esters		C14H28O2	-H	227.202	0.997495	0.887614	0.996283	0.882099
32	32-10	HMDB0037495	3-Methylbutyl nonanoate	Lipids and lipid-like molecules	Fatty Acyls	Fatty acid esters		C14H28O2	-H	227.202	0.997495	0.887614	0.996283	0.882099
32	32-11	HMDB0038034	Nonyl isovalerate	Lipids and lipid-like molecules	Fatty Acyls	Fatty alcohol esters		C14H28O2	-H	227.202	0.997495	0.887614	0.996283	0.882099
32	32-12	HMDB0038969	Dodecyl acetate	Lipids and lipid-like molecules	Fatty Acyls	Fatty alcohol esters		C14H28O2	-H	227.202	0.997495	0.887614	0.996283	0.882099
32	32-13	HMDB0059865	Isobutyl decanoate	Lipids and lipid-like molecules	Fatty Acyls	Fatty acid esters		C14H28O2	-H	227.202	0.997495	0.887614	0.996283	0.882099
32	32-14	HMDB0061781	10-Methyltridecanoic acid	Lipids and lipid-like molecules	Fatty Acyls	Fatty acids and conjugates		C14H28O2	-H	227.202	0.997495	0.887614	0.996283	0.882099
33	33-1	HMDB0000913	Vanillactic acid	Phenylpropanoids and polyketides	Phenylpropanoic acids			C10H12O5	+Na-2H	233.043	0.993172	0.693123	0.977705	0.673043
34	34-1	HMDB0041195	2-O-(Z-p-Hydroxycinnamoyl)-(x)-glyceric acid	Phenylpropanoids and polyketides	Cinnamic acids and derivatives	Hydroxycinnamic acids and derivatives		C12H12O6	-H2O-H	233.046	0.993239	0.659377	0.970064	0.635313
34	34-2	HMDB0061748	Mono-(3-carboxypropyl) phthalate	Benzenoids	Benzene and substituted derivatives	Benzoic acids and derivatives		C12H12O6	-H2O-H	233.046	0.993239	0.659377	0.970064	0.635313
35	35-1	HMDB0000826	Pentadecanoic acid	Lipids and lipid-like molecules	Fatty Acyls	Fatty acids and conjugates	C16537	C15H30O2	-H	241.217	0.997026	0.853504	0.990077	0.842521
36	36-1	HMDB0000089	Cytidine	Nucleosides, nucleotides, and analogues	Pyrimidine nucleosides		C00475	C9H13N3O5	-H	242.078	0.998741	0.614291	0.972862	0.596868
37	37-1	HMDB0031770	Carbofuran	Organoheterocyclic compounds	Coumarans		C14291	C12H15NO3	+Na-2H	242.08	0.998807	0.67517	0.966692	0.651903
38	38-1	HMDB0033455	2-Hydroxy-3-methyl-9H-carbazole	Organoheterocyclic compounds	Indoles and derivatives	Carbazoles		C13H11NO	+HCOO	242.082	0.99885	0.624042	0.959706	0.598207
38	38-2	HMDB0033487	1-Hydroxy-3-methyl-9H-carbazole	Organoheterocyclic compounds	Indoles and derivatives	Carbazoles		C13H11NO	+HCOO	242.082	0.99885	0.624042	0.959706	0.598207
39	39-1	HMDB0035881	11-Hydroxy-9-tridecenoic acid	Lipids and lipid-like molecules	Fatty Acyls	Fatty acids and conjugates		C13H24O3	+Na-2H	249.147	0.996696	0.932561	0.985809	0.916289
39	39-2	HMDB0036139	Menthone 1,2-glyceryl ketal	Lipids and lipid-like molecules	Prenol lipids	Monoterpenoids		C13H24O3	+Na-2H	249.147	0.996696	0.932561	0.985809	0.916289
39	39-3	HMDB0037212	Menthyl lactate	Lipids and lipid-like molecules	Prenol lipids	Monoterpenoids		C13H24O3	+Na-2H	249.147	0.996696	0.932561	0.985809	0.916289
39	39-4	HMDB0040004	Menthone 1,3-glyceryl ketal	Lipids and lipid-like molecules	Prenol lipids	Monoterpenoids		C13H24O3	+Na-2H	249.147	0.996696	0.932561	0.985809	0.916289
40	40-1	HMDB0030917	1-Hydroxyacorenone	Organic oxygen compounds	Organooxygen compounds	Carbonyl compounds		C15H22O3	-H	249.15	0.996492	0.930924	0.991026	0.919333
40	40-2	HMDB0031901	Blennin A	Lipids and lipid-like molecules	Prenol lipids	Terpene lactones		C15H22O3	-H	249.15	0.996492	0.930924	0.991026	0.919333
40	40-3	HMDB0034721	Procurcumadiol	Lipids and lipid-like molecules	Prenol lipids	Sesquiterpenoids		C15H22O3	-H	249.15	0.996492	0.930924	0.991026	0.919333
40	40-4	HMDB0035117	(3beta,6beta)-Furanoeremophilane-3,6-diol	Lipids and lipid-like molecules	Prenol lipids	Sesquiterpenoids		C15H22O3	-H	249.15	0.996492	0.930924	0.991026	0.919333
40	40-5	HMDB0035148	(6beta,8alpha)-6-Hydroxy-7(11)-eremophilen-12,8-olide	Lipids and lipid-like molecules	Prenol lipids	Terpene lactones		C15H22O3	-H	249.15	0.996492	0.930924	0.991026	0.919333
40	40-6	HMDB0035358	Ketosantalic acid	Lipids and lipid-like molecules	Prenol lipids	Sesquiterpenoids		C15H22O3	-H	249.15	0.996492	0.930924	0.991026	0.919333
40	40-7	HMDB0035760	3-Hydroxytrichothecene	Lipids and lipid-like molecules	Prenol lipids	Sesquiterpenoids		C15H22O3	-H	249.15	0.996492	0.930924	0.991026	0.919333
40	40-8	HMDB0035798	Piperdial	Organic oxygen compounds	Organooxygen compounds	Alcohols and polyols	C09711	C15H22O3	-H	249.15	0.996492	0.930924	0.991026	0.919333
40	40-9	HMDB0036036	3beta-Dihydroxymarasmene	Organic oxygen compounds	Organooxygen compounds	Ethers		C15H22O3	-H	249.15	0.996492	0.930924	0.991026	0.919333
40	40-10	HMDB0036037	13-Hydroxymarasmene	Organoheterocyclic compounds	Furofurans			C15H22O3	-H	249.15	0.996492	0.930924	0.991026	0.919333
40	40-11	HMDB0036550	3-Ketoapotrichothecene	Organoheterocyclic compounds	Tetrahydrofurans			C15H22O3	-H	249.15	0.996492	0.930924	0.991026	0.919333
40	40-12	HMDB0036563	Valerenolic acid	Lipids and lipid-like molecules	Prenol lipids	Sesquiterpenoids		C15H22O3	-H	249.15	0.996492	0.930924	0.991026	0.919333
40	40-13	HMDB0037064	FS4 toxin	Organic oxygen compounds	Organooxygen compounds	Alcohols and polyols		C15H22O3	-H	249.15	0.996492	0.930924	0.991026	0.919333
40	40-14	HMDB0037529	Lactaronecatorin A	Lipids and lipid-like molecules	Prenol lipids	Terpene lactones		C15H22O3	-H	249.15	0.996492	0.930924	0.991026	0.919333
40	40-15	HMDB0039156	3beta-Hydroxycinnamolide	Organoheterocyclic compounds	Naphthofurans			C15H22O3	-H	249.15	0.996492	0.930924	0.991026	0.919333
40	40-16	HMDB0039635	Abscisic alcohol	Lipids and lipid-like molecules	Prenol lipids	Sesquiterpenoids		C15H22O3	-H	249.15	0.996492	0.930924	0.991026	0.919333
40	40-17	HMDB0040754	(3beta,8beta)-3-Hydroxy-7(11)-eremophilen-12,8-olide	Lipids and lipid-like molecules	Prenol lipids	Terpene lactones		C15H22O3	-H	249.15	0.996492	0.930924	0.991026	0.919333
41	41-1	HMDB0030347	N-(p-Hydroxyphenethyl)actinidine	Benzenoids	Phenols	1-hydroxy-2-unsubstituted benzenoids	C09984	C18H22NO	-H2O-H	249.152	0.996643	0.921996	0.948017	0.871134
42	42-1	HMDB0013267	N-Decanoylglycine	Organic acids and derivatives	Carboxylic acids and derivatives	Amino acids, peptides, and analogues		C12H23NO3	+Na-2H	250.142	0.997055	0.815493	0.990012	0.80497
43	43-1	HMDB0060843	N-Desthienylethyl-rotigotine	Benzenoids	Tetralins			C13H19NO	+HCOO	250.145	0.99715	0.837505	0.981741	0.81987
44	44-1	HMDB0032246	Dodecanal dimethyl acetal	Organic oxygen compounds	Organooxygen compounds	Ethers		C14H30O2	+Na-2H	251.199	0.996448	0.700237	0.981463	0.684816
44	44-2	HMDB0038678	1,1-Dihexyloxyethane	Organic oxygen compounds	Organooxygen compounds	Ethers		C14H30O2	+Na-2H	251.199	0.996448	0.700237	0.981463	0.684816
45	45-1	HMDB0000477	7Z,10Z-Hexadecadienoic acid	Lipids and lipid-like molecules	Fatty Acyls	Fatty acids and conjugates		C16H28O2	-H	251.202	0.996275	0.717977	0.966271	0.691176
45	45-2	HMDB0029351	Geranyl hexanoate	Lipids and lipid-like molecules	Fatty Acyls	Fatty alcohol esters		C16H28O2	-H	251.202	0.996275	0.717977	0.966271	0.691176
45	45-3	HMDB0030429	Linalyl hexanoate	Lipids and lipid-like molecules	Prenol lipids	Monoterpenoids		C16H28O2	-H	251.202	0.996275	0.717977	0.966271	0.691176
45	45-4	HMDB0031086	(Z)-7-Hexadecen-1,16-olide	Phenylpropanoids and polyketides	Macrolides and analogues			C16H28O2	-H	251.202	0.996275	0.717977	0.966271	0.691176
45	45-5	HMDB0032340	Isoambrettolide	Phenylpropanoids and polyketides	Macrolides and analogues			C16H28O2	-H	251.202	0.996275	0.717977	0.966271	0.691176
45	45-6	HMDB0038255	Geranyl 2-ethylbutyrate	Lipids and lipid-like molecules	Fatty Acyls	Fatty alcohol esters		C16H28O2	-H	251.202	0.996275	0.717977	0.966271	0.691176
45	45-7	HMDB0039131	Ethyl (Z,Z)-5,8-tetradecadienoate	Lipids and lipid-like molecules	Fatty Acyls	Fatty acid esters		C16H28O2	-H	251.202	0.996275	0.717977	0.966271	0.691176
46	46-1	HMDB0002186	Hypogeic acid	Lipids and lipid-like molecules	Fatty Acyls	Fatty acids and conjugates		C16H30O2	-H	253.217	0.997306	0.952397	0.998617	0.948518
46	46-2	HMDB0003229	Palmitoleic acid	Lipids and lipid-like molecules	Fatty Acyls	Fatty acids and conjugates	C08362	C16H30O2	-H	253.217	0.997306	0.952397	0.998617	0.948518
46	46-3	HMDB0010735	Trans-Hexa-dec-2-enoic acid	Lipids and lipid-like molecules	Fatty Acyls	Fatty acids and conjugates		C16H30O2	-H	253.217	0.997306	0.952397	0.998617	0.948518
46	46-4	HMDB0012328	Palmitelaidic acid	Lipids and lipid-like molecules	Fatty Acyls	Fatty acids and conjugates		C16H30O2	-H	253.217	0.997306	0.952397	0.998617	0.948518
46	46-5	HMDB0031053	(E)-6-Hexadecenoic acid	Lipids and lipid-like molecules	Fatty Acyls	Fatty acids and conjugates		C16H30O2	-H	253.217	0.997306	0.952397	0.998617	0.948518
46	46-6	HMDB0031145	5-Dodecyldihydro-2(3H)-furanone	Organoheterocyclic compounds	Lactones	Gamma butyrolactones		C16H30O2	-H	253.217	0.997306	0.952397	0.998617	0.948518
46	46-7	HMDB0031711	15-Hexadecanolide	Phenylpropanoids and polyketides	Macrolides and analogues			C16H30O2	-H	253.217	0.997306	0.952397	0.998617	0.948518
46	46-8	HMDB0032638	(Z)-5-Hexadecenoic acid	Lipids and lipid-like molecules	Fatty Acyls	Fatty acids and conjugates		C16H30O2	-H	253.217	0.997306	0.952397	0.998617	0.948518
46	46-9	HMDB0033791	(E)-3-Hexadecenoic acid	Lipids and lipid-like molecules	Fatty Acyls	Fatty acids and conjugates		C16H30O2	-H	253.217	0.997306	0.952397	0.998617	0.948518
46	46-10	HMDB0035877	(Z)-13-Hexadecenoic acid	Lipids and lipid-like molecules	Fatty Acyls	Fatty acids and conjugates		C16H30O2	-H	253.217	0.997306	0.952397	0.998617	0.948518
46	46-11	HMDB0037647	(E)-11-Hexadecenoic acid	Lipids and lipid-like molecules	Fatty Acyls	Fatty acids and conjugates		C16H30O2	-H	253.217	0.997306	0.952397	0.998617	0.948518
46	46-12	HMDB0038958	Citronellyl hexanoate	Lipids and lipid-like molecules	Fatty Acyls	Fatty alcohol esters		C16H30O2	-H	253.217	0.997306	0.952397	0.998617	0.948518
46	46-13	HMDB0041422	(Z)-14-Methyl-6-pentadecenoic acid	Lipids and lipid-like molecules	Fatty Acyls	Fatty acids and conjugates		C16H30O2	-H	253.217	0.997306	0.952397	0.998617	0.948518
47	47-1	HMDB0000220	Palmitic acid	Lipids and lipid-like molecules	Fatty Acyls	Fatty acids and conjugates	C00249	C16H32O2	-H	255.233	0.997232	0.99301	0.997654	0.987938
47	47-2	HMDB0002396	Trimethyltridecanoic acid	Lipids and lipid-like molecules	Prenol lipids	Sesquiterpenoids		C16H32O2	-H	255.233	0.997232	0.99301	0.997654	0.987938
47	47-3	HMDB0031068	Isopalmitic acid	Lipids and lipid-like molecules	Fatty Acyls	Fatty acids and conjugates		C16H32O2	-H	255.233	0.997232	0.99301	0.997654	0.987938
47	47-4	HMDB0032065	Butyl dodecanoate	Lipids and lipid-like molecules	Fatty Acyls	Fatty acid esters		C16H32O2	-H	255.233	0.997232	0.99301	0.997654	0.987938
47	47-5	HMDB0032249	Dodecyl butyrate	Lipids and lipid-like molecules	Fatty Acyls	Fatty alcohol esters		C16H32O2	-H	255.233	0.997232	0.99301	0.997654	0.987938
47	47-6	HMDB0032324	Hexyl decanoate	Lipids and lipid-like molecules	Fatty Acyls	Fatty acid esters		C16H32O2	-H	255.233	0.997232	0.99301	0.997654	0.987938
47	47-7	HMDB0033166	Octyl octanoate	Lipids and lipid-like molecules	Fatty Acyls	Fatty alcohol esters		C16H32O2	-H	255.233	0.997232	0.99301	0.997654	0.987938
47	47-8	HMDB0034153	Ethyl tetradecanoate	Lipids and lipid-like molecules	Fatty Acyls	Fatty acid esters		C16H32O2	-H	255.233	0.997232	0.99301	0.997654	0.987938
47	47-9	HMDB0036210	Dodecyl 2-methylpropanoate	Lipids and lipid-like molecules	Fatty Acyls	Fatty alcohol esters		C16H32O2	-H	255.233	0.997232	0.99301	0.997654	0.987938
48	48-1	HMDB0013272	N-Lauroylglycine	Organic acids and derivatives	Carboxylic acids and derivatives	Amino acids, peptides, and analogues		C14H27NO3	-H	256.192	0.995513	0.82935	0.975183	0.805139
49	49-1	HMDB0000296	Uridine	Nucleosides, nucleotides, and analogues	Pyrimidine nucleosides		C00299	C9H12N2O6	+Na-2H	265.044	0.992179	0.729915	0.990998	0.717687
49	49-2	HMDB0000767	Pseudouridine	Nucleosides, nucleotides, and analogues	Nucleoside and nucleotide analogues		C02067	C9H12N2O6	+Na-2H	265.044	0.992179	0.729915	0.990998	0.717687
50	50-1	HMDB0033351	Methoxybrassinin	Organoheterocyclic compounds	Indoles and derivatives	Indoles	C08506	C12H14N2OS2	-H	265.048	0.992031	0.508781	0.962605	0.485852
50	50-2	HMDB0040790	4-Methoxybrassinin	Organoheterocyclic compounds	Indoles and derivatives	Indoles		C12H14N2OS2	-H	265.048	0.992031	0.508781	0.962605	0.485852
51	51-1	HMDB0004215	3,3',4'5-Tetrahydroxystilbene	Phenylpropanoids and polyketides	Stilbenes		C05901	C14H12O4	+Na-2H	265.048	0.99234	0.823069	0.977845	0.798669
51	51-2	HMDB0030595	Suberenone	Phenylpropanoids and polyketides	Coumarins and derivatives			C14H12O4	+Na-2H	265.048	0.99234	0.823069	0.977845	0.798669
51	51-3	HMDB0030946	(2E,11Z)-Wyerone acid	Lipids and lipid-like molecules	Fatty Acyls	Fatty acids and conjugates		C14H12O4	+Na-2H	265.048	0.99234	0.823069	0.977845	0.798669
52	52-1	HMDB0041942	N-Acetyl-S-(N-methylcarbamoyl)cysteine	Organic acids and derivatives	Carboxylic acids and derivatives	Amino acids, peptides, and analogues	C11490	C7H12N2O4S	+HCOO	265.05	0.99215	0.539468	0.98208	0.525642
53	53-1	HMDB0002338	Biochanin A	Phenylpropanoids and polyketides	Isoflavonoids	O-methylated isoflavonoids	C00814	C16H12O5	-H2O-H	265.051	0.99234	0.795088	0.969658	0.765058
53	53-2	HMDB0005781	Glycitein	Phenylpropanoids and polyketides	Isoflavonoids	Isoflav-2-enes	C14536	C16H12O5	-H2O-H	265.051	0.99234	0.795088	0.969658	0.765058
53	53-3	HMDB0029522	5,7-Dihydroxy-3-methoxyflavone	Phenylpropanoids and polyketides	Flavonoids	O-methylated flavonoids	C11577	C16H12O5	-H2O-H	265.051	0.99234	0.795088	0.969658	0.765058
53	53-4	HMDB0030768	2-(6-Hydroxy-2-methoxy-3,4-methylenedioxyphenyl)benzofuran	Phenylpropanoids and polyketides	2-arylbenzofuran flavonoids			C16H12O5	-H2O-H	265.051	0.99234	0.795088	0.969658	0.765058
53	53-5	HMDB0031428	Farnisin	Phenylpropanoids and polyketides	Flavonoids	O-methylated flavonoids		C16H12O5	-H2O-H	265.051	0.99234	0.795088	0.969658	0.765058
53	53-6	HMDB0031720	Xenognosin B	Phenylpropanoids and polyketides	Isoflavonoids	O-methylated isoflavonoids	C02920	C16H12O5	-H2O-H	265.051	0.99234	0.795088	0.969658	0.765058
53	53-7	HMDB0034127	Prunetin	Phenylpropanoids and polyketides	Isoflavonoids	O-methylated isoflavonoids	C10521	C16H12O5	-H2O-H	265.051	0.99234	0.795088	0.969658	0.765058
53	53-8	HMDB0036629	(-)-Maackiain	Phenylpropanoids and polyketides	Isoflavonoids	Furanoisoflavonoids		C16H12O5	-H2O-H	265.051	0.99234	0.795088	0.969658	0.765058
53	53-9	HMDB0039166	Cajaquinone	Benzenoids	Anthracenes	Anthraquinones		C16H12O5	-H2O-H	265.051	0.99234	0.795088	0.969658	0.765058
53	53-10	HMDB0039578	1,5-Dihydroxy-2-methoxy-6-methylanthraquinone	Benzenoids	Anthracenes	Anthraquinones		C16H12O5	-H2O-H	265.051	0.99234	0.795088	0.969658	0.765058
53	53-11	HMDB0041758	Melanettin	Phenylpropanoids and polyketides	Neoflavonoids	Neoflavones	C10504	C16H12O5	-H2O-H	265.051	0.99234	0.795088	0.969658	0.765058
53	53-12	HMDB0041776	Stevenin	Phenylpropanoids and polyketides	Neoflavonoids	Neoflavones		C16H12O5	-H2O-H	265.051	0.99234	0.795088	0.969658	0.765058
54	54-1	HMDB0002327	1,11-Undecanedicarboxylic acid	Lipids and lipid-like molecules	Fatty Acyls	Fatty acids and conjugates		C13H24O4	+Na-2H	265.142	0.99768	0.837766	0.957797	0.800548
54	54-2	HMDB0036141	Menthyl ethylene glycol carbonate	Lipids and lipid-like molecules	Prenol lipids	Monoterpenoids		C13H24O4	+Na-2H	265.142	0.99768	0.837766	0.957797	0.800548
54	54-3	HMDB0037184	(±)-1,4-Nonanediol diacetate	Lipids and lipid-like molecules	Fatty Acyls	Fatty alcohol esters		C13H24O4	+Na-2H	265.142	0.99768	0.837766	0.957797	0.800548
55	55-1	HMDB0031902	Blennin D	Lipids and lipid-like molecules	Prenol lipids	Terpene lactones		C15H22O4	-H	265.145	0.998982	0.940029	0.968475	0.909468
55	55-2	HMDB0033229	Absindiol	Lipids and lipid-like molecules	Prenol lipids	Terpene lactones		C15H22O4	-H	265.145	0.998982	0.940029	0.968475	0.909468
55	55-3	HMDB0034696	Artemin	Lipids and lipid-like molecules	Prenol lipids	Terpene lactones		C15H22O4	-H	265.145	0.998982	0.940029	0.968475	0.909468
55	55-4	HMDB0035647	3,14-Dihydroxy-11,13-dihydrocostunolide	Lipids and lipid-like molecules	Prenol lipids	Terpene lactones		C15H22O4	-H	265.145	0.998982	0.940029	0.968475	0.909468
55	55-5	HMDB0035740	Arlatin	Lipids and lipid-like molecules	Prenol lipids	Terpene lactones		C15H22O4	-H	265.145	0.998982	0.940029	0.968475	0.909468
55	55-6	HMDB0036039	3alpha,15-Dihydroxymarasmene	Organoheterocyclic compounds	Furofurans			C15H22O4	-H	265.145	0.998982	0.940029	0.968475	0.909468
55	55-7	HMDB0036152	Alkhanol	Lipids and lipid-like molecules	Prenol lipids	Terpene lactones		C15H22O4	-H	265.145	0.998982	0.940029	0.968475	0.909468
55	55-8	HMDB0037059	1alpha-Hydroxyarbusculin A	Lipids and lipid-like molecules	Prenol lipids	Terpene lactones		C15H22O4	-H	265.145	0.998982	0.940029	0.968475	0.909468
55	55-9	HMDB0038476	7-Hydroxytrichodermol	Lipids and lipid-like molecules	Prenol lipids	Sesquiterpenoids		C15H22O4	-H	265.145	0.998982	0.940029	0.968475	0.909468
56	56-1	HMDB0033483	6,7-Dihydro-4-(hydroxymethyl)-2-(p-hydroxyphenethyl)-7-methyl-5H-2-pyrindinium	Benzenoids	Phenols	1-hydroxy-2-unsubstituted benzenoids		C18H22NO2	-H2O-H	265.147	0.99797	0.865142	0.957664	0.826834
57	57-1	HMDB0028910	Isoleucyl-Isoleucine	Organic acids and derivatives	Carboxylic acids and derivatives	Amino acids, peptides, and analogues		C12H24N2O3	+Na-2H	265.153	0.996981	0.83587	0.603359	0.502807
57	57-2	HMDB0028911	Isoleucyl-Leucine	Organic acids and derivatives	Carboxylic acids and derivatives	Amino acids, peptides, and analogues		C12H24N2O3	+Na-2H	265.153	0.996981	0.83587	0.603359	0.502807
57	57-3	HMDB0028932	Leucyl-Isoleucine	Organic acids and derivatives	Carboxylic acids and derivatives	Amino acids, peptides, and analogues		C12H24N2O3	+Na-2H	265.153	0.996981	0.83587	0.603359	0.502807
57	57-4	HMDB0028933	Leucylleucine	Organic acids and derivatives	Carboxylic acids and derivatives	Amino acids, peptides, and analogues	C11332	C12H24N2O3	+Na-2H	265.153	0.996981	0.83587	0.603359	0.502807
58	58-1	HMDB0028964	Lysylvaline	Organic acids and derivatives	Carboxylic acids and derivatives	Amino acids, peptides, and analogues		C11H23N3O3	+Na-2H	266.149	0.993457	0.772288	0.925307	0.709927
58	58-2	HMDB0029132	Valyllysine	Organic acids and derivatives	Carboxylic acids and derivatives	Amino acids, peptides, and analogues		C11H23N3O3	+Na-2H	266.149	0.993457	0.772288	0.925307	0.709927
59	59-1	HMDB0015299	Procarbazine	Benzenoids	Benzene and substituted derivatives	Benzoic acids and derivatives	C07402	C12H19N3O	+HCOO	266.151	0.993519	0.70737	0.964392	0.67776
60	60-1	HMDB0031042	Avocadene	Lipids and lipid-like molecules	Fatty Acyls	Fatty alcohols		C17H34O3	-H2O-H	267.233	0.996723	0.786759	0.977944	0.766885
60	60-2	HMDB0061663	12-hydroxyheptadecanoic acid	Lipids and lipid-like molecules	Fatty Acyls	Fatty acids and conjugates		C17H34O3	-H2O-H	267.233	0.996723	0.786759	0.977944	0.766885
61	61-1	HMDB0002259	Heptadecanoic acid	Lipids and lipid-like molecules	Fatty Acyls	Fatty acids and conjugates		C17H34O2	-H	269.249	0.997404	0.783541	0.982469	0.767806
61	61-2	HMDB0031067	(S)-14-Methylhexadecanoic acid	Lipids and lipid-like molecules	Fatty Acyls	Fatty acids and conjugates		C17H34O2	-H	269.249	0.997404	0.783541	0.982469	0.767806
61	61-3	HMDB0034131	Nonyl octanoate	Lipids and lipid-like molecules	Fatty Acyls	Fatty alcohol esters		C17H34O2	-H	269.249	0.997404	0.783541	0.982469	0.767806
61	61-4	HMDB0037372	3-Methylbutyl dodecanoate	Lipids and lipid-like molecules	Fatty Acyls	Fatty acid esters		C17H34O2	-H	269.249	0.997404	0.783541	0.982469	0.767806
61	61-5	HMDB0040392	Isopropyl tetradecanoate	Lipids and lipid-like molecules	Fatty Acyls	Fatty acid esters		C17H34O2	-H	269.249	0.997404	0.783541	0.982469	0.767806
61	61-6	HMDB0040598	(±)-11-Methylhexadecanoic acid	Lipids and lipid-like molecules	Fatty Acyls	Fatty acids and conjugates		C17H34O2	-H	269.249	0.997404	0.783541	0.982469	0.767806
61	61-7	HMDB0059870	Ethyl pentadecanoate	Lipids and lipid-like molecules	Fatty Acyls	Fatty acid esters		C17H34O2	-H	269.249	0.997404	0.783541	0.982469	0.767806
61	61-8	HMDB0061859	Methyl hexadecanoic acid	Lipids and lipid-like molecules	Fatty Acyls	Fatty acid esters	C16995	C17H34O2	-H	269.249	0.997404	0.783541	0.982469	0.767806
62	62-1	HMDB0002697	19-Norandrosterone	Lipids and lipid-like molecules	Steroids and steroid derivatives	Estrane steroids		C18H28O2	-H	275.202	0.996174	0.816412	0.982932	0.799407
62	62-2	HMDB0004590	19-Nor-5-androstenediol	Lipids and lipid-like molecules	Steroids and steroid derivatives	Estrane steroids		C18H28O2	-H	275.202	0.996174	0.816412	0.982932	0.799407
62	62-3	HMDB0005886	19-Noretiocholanolone	Lipids and lipid-like molecules	Steroids and steroid derivatives	Estrane steroids		C18H28O2	-H	275.202	0.996174	0.816412	0.982932	0.799407
62	62-4	HMDB0006547	Stearidonic acid	Lipids and lipid-like molecules	Fatty Acyls	Lineolic acids and derivatives	C16300	C18H28O2	-H	275.202	0.996174	0.816412	0.982932	0.799407
62	62-5	HMDB0032464	Phenethyl decanoate	Lipids and lipid-like molecules	Fatty Acyls	Fatty acid esters		C18H28O2	-H	275.202	0.996174	0.816412	0.982932	0.799407
62	62-6	HMDB0032672	4,8,12,15-Octadecatetraenoic acid	Lipids and lipid-like molecules	Fatty Acyls	Lineolic acids and derivatives		C18H28O2	-H	275.202	0.996174	0.816412	0.982932	0.799407
62	62-7	HMDB0034382	(E,E)-11,13-Octadecadien-9-ynoic acid	Lipids and lipid-like molecules	Fatty Acyls	Fatty acids and conjugates		C18H28O2	-H	275.202	0.996174	0.816412	0.982932	0.799407
62	62-8	HMDB0062677	17beta-hydroxy-5beta-estran-3-one	Lipids and lipid-like molecules	Steroids and steroid derivatives	Estrane steroids		C18H28O2	-H	275.202	0.996174	0.816412	0.982932	0.799407
63	63-1	HMDB0001388	alpha-Linolenic acid	Lipids and lipid-like molecules	Fatty Acyls	Lineolic acids and derivatives	C06427	C18H30O2	-H	277.217	0.996693	0.958421	0.992633	0.948214
63	63-2	HMDB0003073	gamma-Linolenic acid	Lipids and lipid-like molecules	Fatty Acyls	Lineolic acids and derivatives	C06426	C18H30O2	-H	277.217	0.996693	0.958421	0.992633	0.948214
63	63-3	HMDB0030962	Calendic acid	Lipids and lipid-like molecules	Fatty Acyls	Lineolic acids and derivatives		C18H30O2	-H	277.217	0.996693	0.958421	0.992633	0.948214
63	63-4	HMDB0030963	Punicic acid	Lipids and lipid-like molecules	Fatty Acyls	Lineolic acids and derivatives		C18H30O2	-H	277.217	0.996693	0.958421	0.992633	0.948214
63	63-5	HMDB0030964	Linolenelaidic acid	Lipids and lipid-like molecules	Fatty Acyls	Lineolic acids and derivatives		C18H30O2	-H	277.217	0.996693	0.958421	0.992633	0.948214
64	64-1	HMDB0000673	Linoleic acid	Lipids and lipid-like molecules	Fatty Acyls	Lineolic acids and derivatives	C01595	C18H32O2	-H	279.233	0.996911	0.916699	0.992945	0.907421
64	64-2	HMDB0003797	Bovinic acid	Lipids and lipid-like molecules	Fatty Acyls	Lineolic acids and derivatives	C04056	C18H32O2	-H	279.233	0.996911	0.916699	0.992945	0.907421
64	64-3	HMDB0005047	(9E,11E)-Octadecadienoic acid	Lipids and lipid-like molecules	Fatty Acyls	Lineolic acids and derivatives		C18H32O2	-H	279.233	0.996911	0.916699	0.992945	0.907421
64	64-4	HMDB0006270	Linoelaidic acid	Lipids and lipid-like molecules	Fatty Acyls	Lineolic acids and derivatives		C18H32O2	-H	279.233	0.996911	0.916699	0.992945	0.907421
64	64-5	HMDB0029800	Mangiferic acid	Lipids and lipid-like molecules	Fatty Acyls	Lineolic acids and derivatives		C18H32O2	-H	279.233	0.996911	0.916699	0.992945	0.907421
64	64-6	HMDB0030430	Linalyl caprylate	Lipids and lipid-like molecules	Prenol lipids	Monoterpenoids		C18H32O2	-H	279.233	0.996911	0.916699	0.992945	0.907421
64	64-7	HMDB0031051	Ethyl 2E,4Z-hexadecadienoate	Lipids and lipid-like molecules	Fatty Acyls	Fatty acid esters		C18H32O2	-H	279.233	0.996911	0.916699	0.992945	0.907421
64	64-8	HMDB0031097	5-Octadecynoic acid	Lipids and lipid-like molecules	Fatty Acyls	Fatty acids and conjugates		C18H32O2	-H	279.233	0.996911	0.916699	0.992945	0.907421
64	64-9	HMDB0062238	6Z,9Z-octadecadienoic acid	Lipids and lipid-like molecules	Fatty Acyls	Lineolic acids and derivatives		C18H32O2	-H	279.233	0.996911	0.916699	0.992945	0.907421
64	64-10	HMDB0062784	Octadecadienoate	Lipids and lipid-like molecules	Fatty Acyls	Lineolic acids and derivatives		C18H32O2	-H	279.233	0.996911	0.916699	0.992945	0.907421
65	65-1	HMDB0000207	Oleic acid	Lipids and lipid-like molecules	Fatty Acyls	Fatty acids and conjugates	C00712	C18H34O2	-H	281.249	0.997235	0.980947	0.996227	0.974544
65	65-2	HMDB0000573	Elaidic acid	Lipids and lipid-like molecules	Fatty Acyls	Fatty acids and conjugates	C01712	C18H34O2	-H	281.249	0.997235	0.980947	0.996227	0.974544
65	65-3	HMDB0003231	Vaccenic acid	Lipids and lipid-like molecules	Fatty Acyls	Fatty acids and conjugates	C08367	C18H34O2	-H	281.249	0.997235	0.980947	0.996227	0.974544
65	65-4	HMDB0041480	(Z)-13-Octadecenoic acid	Lipids and lipid-like molecules	Fatty Acyls	Fatty acids and conjugates		C18H34O2	-H	281.249	0.997235	0.980947	0.996227	0.974544
65	65-5	HMDB0059871	Ethyl 9-hexadecenoate	Lipids and lipid-like molecules	Fatty Acyls	Fatty acid esters		C18H34O2	-H	281.249	0.997235	0.980947	0.996227	0.974544
65	65-6	HMDB0062242	7Z-octadecenoic acid	Lipids and lipid-like molecules	Fatty Acyls	Fatty acids and conjugates		C18H34O2	-H	281.249	0.997235	0.980947	0.996227	0.974544
65	65-7	HMDB0062703	Octadec-9-enoic Acid	Lipids and lipid-like molecules	Fatty Acyls	Fatty acids and conjugates		C18H34O2	-H	281.249	0.997235	0.980947	0.996227	0.974544
66	66-1	HMDB0037548	2,4-Dihydroxy-6,7-dimethoxy-2H-1,4-benzoxazin-3(4H)-one	Organoheterocyclic compounds	Benzoxazines	Benzoxazinones		C10H11NO6	+HCOO	286.057	0.998233	0.634968	0.96945	0.614482
66	66-2	HMDB0037549	2,4-Dihydroxy-7,8-dimethoxy-2H-1,4-benzoxazin-3(4H)-one	Organoheterocyclic compounds	Benzoxazines	Benzoxazinones		C10H11NO6	+HCOO	286.057	0.998233	0.634968	0.96945	0.614482
67	67-1	HMDB0014659	Albendazole	Organoheterocyclic compounds	Benzimidazoles	2-benzimidazolylcarbamic acid esters	C01779	C12H15N3O2S	+Na-2H	286.063	0.998302	0.549207	0.96083	0.526799
68	68-1	HMDB0000982	5-Methylcytidine	Nucleosides, nucleotides, and analogues	Pyrimidine nucleosides			C10H15N3O5	+Cl	292.07	0.997871	0.686638	0.914675	0.626713
68	68-2	HMDB0039229	Pyro-L-glutaminyl-L-glutamine	Organic acids and derivatives	Carboxylic acids and derivatives	Amino acids, peptides, and analogues		C10H15N3O5	+Cl	292.07	0.997871	0.686638	0.914675	0.626713
68	68-3	HMDB0240577	3-Methylcytidine	Nucleosides, nucleotides, and analogues	Pyrimidine nucleosides			C10H15N3O5	+Cl	292.07	0.997871	0.686638	0.914675	0.626713
69	69-1	HMDB0039955	Carotamine	Benzenoids	Benzene and substituted derivatives	Anilides		C14H13N3O3	+Na-2H	292.07	0.998391	0.577392	0.956817	0.55157
70	70-1	HMDB0000086	Glycerophosphocholine	Lipids and lipid-like molecules	Glycerophospholipids	Glycerophosphocholines	C00670	C8H20NO6P	+Cl	292.071	0.997887	0.721851	0.935433	0.673816
71	71-1	HMDB0014643	Tolmetin	Organic oxygen compounds	Organooxygen compounds	Carbonyl compounds	C07149	C15H15NO3	+Cl	292.074	0.997854	0.672193	0.90557	0.607412
72	72-1	HMDB0034058	Quinacridone	Organoheterocyclic compounds	Quinolines and derivatives	Benzoquinolines		C20H12N2O2	-H2O-H	293.072	0.993619	0.651307	0.947775	0.613354
73	73-1	HMDB0035918	7(14)-Bisabolene-2,3,10,11-tetrol	Lipids and lipid-like molecules	Prenol lipids	Sesquiterpenoids		C15H28O4	+Na-2H	293.173	0.996041	0.73229	0.964859	0.70376
74	74-1	HMDB0035722	Tanacetol A	Lipids and lipid-like molecules	Prenol lipids	Sesquiterpenoids		C17H26O4	-H	293.176	0.99657	0.744697	0.953648	0.707742
74	74-2	HMDB0035754	Phytuberin	Lipids and lipid-like molecules	Prenol lipids	Sesquiterpenoids	C09709	C17H26O4	-H	293.176	0.99657	0.744697	0.953648	0.707742
74	74-3	HMDB0040646	Myrsinone	Lipids and lipid-like molecules	Prenol lipids	Quinone and hydroquinone lipids		C17H26O4	-H	293.176	0.99657	0.744697	0.953648	0.707742
75	75-1	HMDB0015026	Granisetron	Organoheterocyclic compounds	Benzopyrazoles	Indazoles	C07023	C18H24N4O	-H2O-H	293.177	0.996703	0.72967	0.948684	0.689944
76	76-1	HMDB0014607	Sodium Tetradecyl Sulfate	Organic acids and derivatives	Organic sulfuric acids and derivatives	Sulfuric acid esters		C14H30O4S	-H	293.179	0.997567	0.8147	0.955223	0.776327
77	77-1	HMDB0011684	N(6)-(Octanoyl)lysine	Organic acids and derivatives	Carboxylic acids and derivatives	Amino acids, peptides, and analogues		C14H28N2O3	+Na-2H	293.185	0.997383	0.845835	0.951861	0.803011
78	78-1	HMDB0003871	13-L-Hydroperoxylinoleic acid	Lipids and lipid-like molecules	Fatty Acyls	Lineolic acids and derivatives	C04717	C18H32O4	-H2O-H	293.212	0.997553	0.651095	0.961415	0.624441
78	78-2	HMDB0004706	8(R)-Hydroperoxylinoleic acid	Lipids and lipid-like molecules	Fatty Acyls	Lineolic acids and derivatives	C14831	C18H32O4	-H2O-H	293.212	0.997553	0.651095	0.961415	0.624441
78	78-3	HMDB0006940	9(S)-HPODE	Lipids and lipid-like molecules	Fatty Acyls	Lineolic acids and derivatives	C14827	C18H32O4	-H2O-H	293.212	0.997553	0.651095	0.961415	0.624441
78	78-4	HMDB0010201	12,13-DiHODE	Lipids and lipid-like molecules	Fatty Acyls	Lineolic acids and derivatives		C18H32O4	-H2O-H	293.212	0.997553	0.651095	0.961415	0.624441
78	78-5	HMDB0010208	15,16-DiHODE	Lipids and lipid-like molecules	Fatty Acyls	Lineolic acids and derivatives		C18H32O4	-H2O-H	293.212	0.997553	0.651095	0.961415	0.624441
78	78-6	HMDB0010221	9,10-DiHODE	Lipids and lipid-like molecules	Fatty Acyls	Lineolic acids and derivatives		C18H32O4	-H2O-H	293.212	0.997553	0.651095	0.961415	0.624441
78	78-7	HMDB0040900	(±)-(E)-13-Hydroxy-10-oxo-11-octadecenoic acid	Lipids and lipid-like molecules	Fatty Acyls	Lineolic acids and derivatives		C18H32O4	-H2O-H	293.212	0.997553	0.651095	0.961415	0.624441
78	78-8	HMDB0062281	11-HpODE	Lipids and lipid-like molecules	Fatty Acyls	Lineolic acids and derivatives	C07338	C18H32O4	-H2O-H	293.212	0.997553	0.651095	0.961415	0.624441
78	78-9	HMDB0062434	(10E,12Z)-(9S)-9-Hydroperoxyoctadeca-10,12-dienoic acid	Lipids and lipid-like molecules	Fatty Acyls	Lineolic acids and derivatives	C14827	C18H32O4	-H2O-H	293.212	0.997553	0.651095	0.961415	0.624441
79	79-1	HMDB0031336	(Z)-9-Cycloheptadecen-1-one	Organic oxygen compounds	Organooxygen compounds	Carbonyl compounds		C17H30O	+HCOO	295.228	0.997755	0.7713	0.974035	0.749586
79	79-2	HMDB0041334	8,11-Heptadecadienal	Lipids and lipid-like molecules	Fatty Acyls	Fatty aldehydes		C17H30O	+HCOO	295.228	0.997755	0.7713	0.974035	0.749586
80	80-1	HMDB0013622	10Z-Nonadecenoic acid	Lipids and lipid-like molecules	Fatty Acyls	Fatty acids and conjugates		C19H36O2	-H	295.264	0.997085	0.544778	0.95844	0.520615
81	81-1	HMDB0038938	Panaquinquecol 2	Lipids and lipid-like molecules	Fatty Acyls	Fatty alcohols		C17H24O3	+Na-2H	297.147	0.999257	0.573388	0.965633	0.553271
81	81-2	HMDB0038994	Ginsenoyne C	Lipids and lipid-like molecules	Fatty Acyls	Fatty alcohols		C17H24O3	+Na-2H	297.147	0.999257	0.573388	0.965633	0.553271
81	81-3	HMDB0040375	Ginsenoyne K	Lipids and lipid-like molecules	Fatty Acyls	Fatty alcohols		C17H24O3	+Na-2H	297.147	0.999257	0.573388	0.965633	0.553271
81	81-4	HMDB0041201	Panaquinquecol 7	Lipids and lipid-like molecules	Fatty Acyls	Fatty alcohols		C17H24O3	+Na-2H	297.147	0.999257	0.573388	0.965633	0.553271
82	82-1	HMDB0011532	MG(15:0)	Lipids and lipid-like molecules	Glycerolipids	Monoradylglycerols		C18H36O4	-H2O-H	297.244	0.999192	0.732043	0.958111	0.700812
82	82-2	HMDB0031008	(+)-15,16-Dihydroxyoctadecanoic acid	Lipids and lipid-like molecules	Fatty Acyls	Fatty acids and conjugates		C18H36O4	-H2O-H	297.244	0.999192	0.732043	0.958111	0.700812
82	82-3	HMDB0059633	(9S,10S)-9,10-dihydroxyoctadecanoate	Lipids and lipid-like molecules	Fatty Acyls	Fatty acids and conjugates	C15988	C18H36O4	-H2O-H	297.244	0.999192	0.732043	0.958111	0.700812
83	83-1	HMDB0001999	Eicosapentaenoic acid	Lipids and lipid-like molecules	Fatty Acyls	Fatty acids and conjugates	C06428	C20H30O2	-H	301.217	0.996571	0.899922	0.991113	0.888865
83	83-2	HMDB0003598	Retinyl ester	Lipids and lipid-like molecules	Prenol lipids	Retinoids	C02075	C20H30O2	-H	301.217	0.996571	0.899922	0.991113	0.888865
83	83-3	HMDB0035692	8,15-Isopimaradien-18-oic acid	Lipids and lipid-like molecules	Prenol lipids	Diterpenoids		C20H30O2	-H	301.217	0.996571	0.899922	0.991113	0.888865
83	83-4	HMDB0036703	Siderone	Lipids and lipid-like molecules	Prenol lipids	Diterpenoids		C20H30O2	-H	301.217	0.996571	0.899922	0.991113	0.888865
83	83-5	HMDB0036709	Yucalexin B14	Lipids and lipid-like molecules	Prenol lipids	Diterpenoids		C20H30O2	-H	301.217	0.996571	0.899922	0.991113	0.888865
83	83-6	HMDB0036775	Yucalexin A16	Lipids and lipid-like molecules	Prenol lipids	Diterpenoids		C20H30O2	-H	301.217	0.996571	0.899922	0.991113	0.888865
83	83-7	HMDB0036805	8(17),12-Labdadiene-15,16-dial	Lipids and lipid-like molecules	Prenol lipids	Diterpenoids		C20H30O2	-H	301.217	0.996571	0.899922	0.991113	0.888865
83	83-8	HMDB0036811	Isopimaric acid	Lipids and lipid-like molecules	Prenol lipids	Diterpenoids	C09118	C20H30O2	-H	301.217	0.996571	0.899922	0.991113	0.888865
83	83-9	HMDB0036826	Cascarillone	Lipids and lipid-like molecules	Prenol lipids	Diterpenoids		C20H30O2	-H	301.217	0.996571	0.899922	0.991113	0.888865
83	83-10	HMDB0038172	8,13-Abietadien-18-oic acid	Lipids and lipid-like molecules	Prenol lipids	Diterpenoids	C12077	C20H30O2	-H	301.217	0.996571	0.899922	0.991113	0.888865
83	83-11	HMDB0038687	(ent-15beta,16beta)-15,16-Epoxy-3-kauranone	Lipids and lipid-like molecules	Prenol lipids	Diterpenoids		C20H30O2	-H	301.217	0.996571	0.899922	0.991113	0.888865
83	83-12	HMDB0039486	ent-8(17),13(16),14-Labdatrien-18-oic acid	Lipids and lipid-like molecules	Prenol lipids	Diterpenoids		C20H30O2	-H	301.217	0.996571	0.899922	0.991113	0.888865
84	84-1	HMDB0001043	Arachidonic acid	Lipids and lipid-like molecules	Fatty Acyls	Fatty acids and conjugates	C00219	C20H32O2	-H	303.233	0.996357	0.968632	0.994078	0.959388
84	84-2	HMDB0002177	Cis-8,11,14,17-Eicosatetraenoic acid	Lipids and lipid-like molecules	Fatty Acyls	Fatty acids and conjugates		C20H32O2	-H	303.233	0.996357	0.968632	0.994078	0.959388
84	84-3	HMDB0006036	Mesterolone	Lipids and lipid-like molecules	Steroids and steroid derivatives	Androstane steroids	D04947	C20H32O2	-H	303.233	0.996357	0.968632	0.994078	0.959388
84	84-4	HMDB0036702	Sideridiol	Lipids and lipid-like molecules	Prenol lipids	Diterpenoids		C20H32O2	-H	303.233	0.996357	0.968632	0.994078	0.959388
84	84-5	HMDB0036721	ent-17-Hydroxy-16beta-kauran-19-al	Lipids and lipid-like molecules	Prenol lipids	Diterpenoids		C20H32O2	-H	303.233	0.996357	0.968632	0.994078	0.959388
84	84-6	HMDB0036754	Yucalexin P21	Lipids and lipid-like molecules	Prenol lipids	Diterpenoids		C20H32O2	-H	303.233	0.996357	0.968632	0.994078	0.959388
84	84-7	HMDB0036829	Copalic acid	Lipids and lipid-like molecules	Prenol lipids	Diterpenoids		C20H32O2	-H	303.233	0.996357	0.968632	0.994078	0.959388
84	84-8	HMDB0036830	Junicedral	Lipids and lipid-like molecules	Prenol lipids	Diterpenoids		C20H32O2	-H	303.233	0.996357	0.968632	0.994078	0.959388
84	84-9	HMDB0037824	7,13-Eperudien-15-oic acid	Lipids and lipid-like molecules	Prenol lipids	Diterpenoids		C20H32O2	-H	303.233	0.996357	0.968632	0.994078	0.959388
84	84-10	HMDB0039687	Oryzalexin S	Lipids and lipid-like molecules	Prenol lipids	Diterpenoids		C20H32O2	-H	303.233	0.996357	0.968632	0.994078	0.959388
84	84-11	HMDB0039702	Oryzalexin E	Benzenoids	Phenanthrenes and derivatives	Hydrophenanthrenes		C20H32O2	-H	303.233	0.996357	0.968632	0.994078	0.959388
85	85-1	HMDB0029282	Avenanthramide 1p	Phenylpropanoids and polyketides	Cinnamic acids and derivatives	Hydroxycinnamic acids and derivatives		C16H13NO4	+Na-2H	304.059	0.994267	0.580798	0.868562	0.501567
85	85-2	HMDB0038943	(E)-Avenanthramide D	Phenylpropanoids and polyketides	Cinnamic acids and derivatives	Hydroxycinnamic acids and derivatives		C16H13NO4	+Na-2H	304.059	0.994267	0.580798	0.868562	0.501567
86	86-1	HMDB0034364	Cepharadione A	Alkaloids and derivatives	Aporphines			C18H11NO4	-H	304.062	0.994221	0.580518	0.661282	0.381668
87	87-1	HMDB0038361	(-)-Epigallocatechin	Phenylpropanoids and polyketides	Flavonoids	Flavans	C12136	C15H14O7	-H	305.067	0.998238	0.714163	0.966961	0.689351
87	87-2	HMDB0038365	(+)-Gallocatechin	Phenylpropanoids and polyketides	Flavonoids	Flavans	C12127	C15H14O7	-H	305.067	0.998238	0.714163	0.966961	0.689351
88	88-1	HMDB0000827	Stearic acid	Lipids and lipid-like molecules	Fatty Acyls	Fatty acids and conjugates	C01530	C18H36O2	+Na-2H	305.246	0.996534	0.945341	0.994463	0.936848
88	88-2	HMDB0029811	Ethyl hexadecanoate	Lipids and lipid-like molecules	Fatty Acyls	Fatty acid esters		C18H36O2	+Na-2H	305.246	0.996534	0.945341	0.994463	0.936848
88	88-3	HMDB0031066	16-Methylheptadecanoic acid	Lipids and lipid-like molecules	Fatty Acyls	Fatty acids and conjugates	C20356	C18H36O2	+Na-2H	305.246	0.996534	0.945341	0.994463	0.936848
88	88-4	HMDB0061946	Hexyl dodecanoate	Lipids and lipid-like molecules	Fatty Acyls	Fatty acid esters		C18H36O2	+Na-2H	305.246	0.996534	0.945341	0.994463	0.936848
89	89-1	HMDB0029797	(Z)-15-Oxo-11-eicosenoic acid	Lipids and lipid-like molecules	Fatty Acyls	Fatty acids and conjugates		C20H36O3	-H2O-H	305.249	0.996509	0.962329	0.993125	0.952377
89	89-2	HMDB0034957	(13R,14R)-8-Labdene-13,14,15-triol	Lipids and lipid-like molecules	Prenol lipids	Diterpenoids		C20H36O3	-H2O-H	305.249	0.996509	0.962329	0.993125	0.952377
89	89-3	HMDB0034958	(13R,14R)-7-Labdene-13,14,15-triol	Lipids and lipid-like molecules	Prenol lipids	Diterpenoids		C20H36O3	-H2O-H	305.249	0.996509	0.962329	0.993125	0.952377
90	90-1	HMDB0005923	N4-Acetylcytidine	Nucleosides, nucleotides, and analogues	Pyrimidine nucleosides			C11H15N3O6	+Na-2H	306.071	0.998297	0.643366	0.970347	0.623225
91	91-1	HMDB0030177	Arborinine	Organoheterocyclic compounds	Quinolines and derivatives	Benzoquinolines	C10643	C16H15NO4	+Na-2H	306.075	0.998169	0.740844	0.963664	0.712618
92	92-1	HMDB0015141	Letrozole	Benzenoids	Benzene and substituted derivatives	Diphenylmethanes	C08163	C17H11N5	+Na-2H	306.076	0.99817	0.743374	0.959271	0.711792
93	93-1	HMDB0000125	Glutathione	Organic acids and derivatives	Carboxylic acids and derivatives	Amino acids, peptides, and analogues	C00051	C10H17N3O6S	-H	306.077	0.998172	0.713678	0.975567	0.694969
94	94-1	HMDB0029826	Hallacridone	Organoheterocyclic compounds	Quinolines and derivatives	Benzoquinolines		C18H13NO4	-H	306.077	0.998156	0.749399	0.959197	0.717496
95	95-1	HMDB0015166	Probenecid	Benzenoids	Benzene and substituted derivatives	Benzenesulfonamides	C07372	C13H19NO4S	+Na-2H	306.078	0.998092	0.734592	0.96915	0.710571
96	96-1	HMDB0041895	Flumequine	Organoheterocyclic compounds	Quinolines and derivatives	Quinoline carboxylic acids		C14H12FNO3	+HCOO	306.078	0.998099	0.752259	0.970248	0.728491
97	97-1	HMDB0032316	Hexanal dihexyl acetal	Organic oxygen compounds	Organooxygen compounds	Ethers		C18H38O2	+Na-2H	307.262	0.996535	0.862299	0.992858	0.853173
98	98-1	HMDB0040756	3-Hydroxy-6,8-dimethoxy-7(11)-eremophilen-12,8-olide	Lipids and lipid-like molecules	Prenol lipids	Terpene lactones		C17H26O5	-H	309.171	0.997858	0.917371	0.890415	0.815091
98	98-2	HMDB0040980	Valdiate	Lipids and lipid-like molecules	Prenol lipids	Monoterpenoids		C17H26O5	-H	309.171	0.997858	0.917371	0.890415	0.815091
99	99-1	HMDB0061062	7-hydroxygranisetron	Organoheterocyclic compounds	Benzopyrazoles	Indazoles		C18H24N4O2	-H2O-H	309.172	0.99783	0.922321	0.972844	0.895327
100	100-1	HMDB0034579	8-O-Methyloblongine	Organoheterocyclic compounds	Isoquinolines and derivatives	Benzylisoquinolines		C20H26NO3	-H2O-H	309.173	0.99533	0.822426	0.959446	0.785388
101	101-1	HMDB0002231	11Z-Eicosenoic acid	Lipids and lipid-like molecules	Fatty Acyls	Fatty acids and conjugates	C16526	C20H38O2	-H	309.28	0.997013	0.888797	0.991419	0.878538
102	102-1	HMDB0031098	(9Z,11E,13E,15Z)-4-Oxo-9,11,13,15-octadecatetraenoic acid	Lipids and lipid-like molecules	Fatty Acyls	Lineolic acids and derivatives		C18H26O3	+Na-2H	311.163	0.99882	0.678467	0.981539	0.665156
103	103-1	HMDB0031976	Methyl (9Z)-10'-oxo-6,10'-diapo-6-carotenoate	Lipids and lipid-like molecules	Fatty Acyls	Fatty aldehydes		C20H24O3	-H	311.165	0.999176	0.611704	0.978971	0.598347
103	103-2	HMDB0040761	4'-Hydroxy-5,5'-diisopropyl-2,2'-dimethyl-3,4-biphenylquinone	Lipids and lipid-like molecules	Prenol lipids	Monoterpenoids		C20H24O3	-H	311.165	0.999176	0.611704	0.978971	0.598347
103	103-3	HMDB0061027	2-hydroxyethinylestradiol	Lipids and lipid-like molecules	Steroids and steroid derivatives	Estrane steroids		C20H24O3	-H	311.165	0.999176	0.611704	0.978971	0.598347
104	104-1	HMDB0032549	N-Undecylbenzenesulfonic acid	Benzenoids	Benzene and substituted derivatives	Benzenesulfonic acids and derivatives		C17H28O3S	-H	311.169	0.99933	0.685499	0.982644	0.673149
105	105-1	HMDB0004708	9,12,13-TriHOME	Lipids and lipid-like molecules	Fatty Acyls	Fatty acids and conjugates	C14833	C18H34O5	-H2O-H	311.223	0.998724	0.645634	0.956713	0.616899
105	105-2	HMDB0004710	9,10,13-TriHOME	Lipids and lipid-like molecules	Fatty Acyls	Fatty acids and conjugates	C14835	C18H34O5	-H2O-H	311.223	0.998724	0.645634	0.956713	0.616899
105	105-3	HMDB0030936	5,8,12-Trihydroxy-9-octadecenoic acid	Lipids and lipid-like molecules	Fatty Acyls	Fatty acids and conjugates		C18H34O5	-H2O-H	311.223	0.998724	0.645634	0.956713	0.616899
105	105-4	HMDB0038555	(9S,10E,12S,13S)-9,12,13-Trihydroxy-10-octadecenoic acid	Lipids and lipid-like molecules	Fatty Acyls	Fatty acids and conjugates		C18H34O5	-H2O-H	311.223	0.998724	0.645634	0.956713	0.616899
106	106-1	HMDB0000782	Octadecanedioic acid	Lipids and lipid-like molecules	Fatty Acyls	Fatty acids and conjugates		C18H34O4	-H	313.238	0.999192	0.93656	0.97322	0.910742
106	106-2	HMDB0004704	9,10-DHOME	Lipids and lipid-like molecules	Fatty Acyls	Fatty acids and conjugates		C18H34O4	-H	313.238	0.999192	0.93656	0.97322	0.910742
106	106-3	HMDB0004705	12,13-DHOME	Lipids and lipid-like molecules	Fatty Acyls	Fatty acids and conjugates	C14829	C18H34O4	-H	313.238	0.999192	0.93656	0.97322	0.910742
106	106-4	HMDB0041220	Dibutyl decanedioate	Lipids and lipid-like molecules	Fatty Acyls	Fatty acid esters		C18H34O4	-H	313.238	0.999192	0.93656	0.97322	0.910742
107	107-1	HMDB0034381	Methyl linoleate	Lipids and lipid-like molecules	Fatty Acyls	Lineolic acids and derivatives		C19H34O2	+Na-2H	315.231	0.995654	0.730878	0.978795	0.712271
108	108-1	HMDB0000253	Pregnenolone	Lipids and lipid-like molecules	Steroids and steroid derivatives	Pregnane steroids	C01953	C21H32O2	-H	315.233	0.995775	0.722662	0.969525	0.697679
108	108-2	HMDB0003069	20alpha-Dihydroprogesterone	Lipids and lipid-like molecules	Steroids and steroid derivatives	Pregnane steroids	C04042	C21H32O2	-H	315.233	0.995775	0.722662	0.969525	0.697679
108	108-3	HMDB0003759	5a-Pregnane-3,20-dione	Lipids and lipid-like molecules	Steroids and steroid derivatives	Pregnane steroids	C03681	C21H32O2	-H	315.233	0.995775	0.722662	0.969525	0.697679
108	108-4	HMDB0006002	Ethyltestosterone	Lipids and lipid-like molecules	Steroids and steroid derivatives	Pregnane steroids		C21H32O2	-H	315.233	0.995775	0.722662	0.969525	0.697679
108	108-5	HMDB0006048	Bolasterone	Lipids and lipid-like molecules	Steroids and steroid derivatives	Androstane steroids	C14475	C21H32O2	-H	315.233	0.995775	0.722662	0.969525	0.697679
108	108-6	HMDB0036729	Kaurenoic acid methyl ester	Lipids and lipid-like molecules	Prenol lipids	Diterpenoids		C21H32O2	-H	315.233	0.995775	0.722662	0.969525	0.697679
108	108-7	HMDB0059652	5-alpha-Pregnan-3,20-dione	Lipids and lipid-like molecules	Steroids and steroid derivatives	Pregnane steroids		C21H32O2	-H	315.233	0.995775	0.722662	0.969525	0.697679
109	109-1	HMDB0001085	Leukotriene B4	Lipids and lipid-like molecules	Fatty Acyls	Eicosanoids	C02165	C20H32O4	-H2O-H	317.212	0.995969	0.648334	0.963576	0.622201
109	109-2	HMDB0004688	Hepoxilin A3	Lipids and lipid-like molecules	Fatty Acyls	Eicosanoids	C14808	C20H32O4	-H2O-H	317.212	0.995969	0.648334	0.963576	0.622201
109	109-3	HMDB0004690	Hepoxilin B3	Lipids and lipid-like molecules	Fatty Acyls	Eicosanoids	C14810	C20H32O4	-H2O-H	317.212	0.995969	0.648334	0.963576	0.622201
109	109-4	HMDB0004693	11H-14,15-EETA	Lipids and lipid-like molecules	Fatty Acyls	Fatty acids and conjugates	C14813	C20H32O4	-H2O-H	317.212	0.995969	0.648334	0.963576	0.622201
109	109-5	HMDB0005050	15H-11,12-EETA	Organic acids and derivatives	Hydroxy acids and derivatives	Medium-chain hydroxy acids and derivatives	C14781	C20H32O4	-H2O-H	317.212	0.995969	0.648334	0.963576	0.622201
109	109-6	HMDB0005087	6-trans-Leukotriene B4	Lipids and lipid-like molecules	Fatty Acyls	Eicosanoids		C20H32O4	-H2O-H	317.212	0.995969	0.648334	0.963576	0.622201
109	109-7	HMDB0005088	6-trans-12-epi-Leukotriene B4	Lipids and lipid-like molecules	Fatty Acyls	Eicosanoids		C20H32O4	-H2O-H	317.212	0.995969	0.648334	0.963576	0.622201
109	109-8	HMDB0005089	12(S)-Leukotriene B4	Lipids and lipid-like molecules	Fatty Acyls	Eicosanoids	C04853	C20H32O4	-H2O-H	317.212	0.995969	0.648334	0.963576	0.622201
109	109-9	HMDB0010216	5,15-DiHETE	Lipids and lipid-like molecules	Fatty Acyls	Eicosanoids		C20H32O4	-H2O-H	317.212	0.995969	0.648334	0.963576	0.622201
109	109-10	HMDB0010219	8,15-DiHETE	Lipids and lipid-like molecules	Fatty Acyls	Eicosanoids		C20H32O4	-H2O-H	317.212	0.995969	0.648334	0.963576	0.622201
109	109-11	HMDB0012498	10,11-dihydro-12-oxo-LTB4	Lipids and lipid-like molecules	Fatty Acyls	Eicosanoids		C20H32O4	-H2O-H	317.212	0.995969	0.648334	0.963576	0.622201
109	109-12	HMDB0012839	6,7-dihydro-5-oxo-12-epi-LTB4	Lipids and lipid-like molecules	Fatty Acyls	Eicosanoids		C20H32O4	-H2O-H	317.212	0.995969	0.648334	0.963576	0.622201
109	109-13	HMDB0060103	9-Deoxy-delta12-PGD2	Lipids and lipid-like molecules	Fatty Acyls	Eicosanoids		C20H32O4	-H2O-H	317.212	0.995969	0.648334	0.963576	0.622201
109	109-14	HMDB0062409	5,12-dihydroxy-6,8,10,14-eicosatetraenoic acid	Lipids and lipid-like molecules	Fatty Acyls	Eicosanoids		C20H32O4	-H2O-H	317.212	0.995969	0.648334	0.963576	0.622201
109	109-15	HMDB0062479	10-hydroxy-11S,12S-epoxy-5Z,8Z,14Z-eicosatrienoic acid	Lipids and lipid-like molecules	Fatty Acyls	Eicosanoids		C20H32O4	-H2O-H	317.212	0.995969	0.648334	0.963576	0.622201
109	109-16	HMDB0062615	5(S),11(R)-DiHETE	Lipids and lipid-like molecules	Fatty Acyls	Eicosanoids		C20H32O4	-H2O-H	317.212	0.995969	0.648334	0.963576	0.622201
109	109-17	HMDB0062619	(5Z,9E,14Z)-(8xi,11R,12S)-11,12-epoxy-8-hydroxyicosa-5,9,14-trienoic Acid	Lipids and lipid-like molecules	Fatty Acyls	Eicosanoids	C04849	C20H32O4	-H2O-H	317.212	0.995969	0.648334	0.963576	0.622201
109	109-18	HMDB0062749	5(S),15(R)-DiHETE					C20H32O4	-H2O-H	317.212	0.995969	0.648334	0.963576	0.622201
110	110-1	HMDB0094677	Dodecanoic acid, trimethylsilyl ester	Organometallic compounds	Organometalloid compounds	Organosilicon compounds		C15H32O2Si	+HCOO	317.215	0.995954	0.606655	0.957441	0.578486
111	111-1	HMDB0002265	14,15-DiHETrE	Lipids and lipid-like molecules	Fatty Acyls	Eicosanoids	C14775	C20H34O4	-H2O-H	319.228	0.997003	0.787281	0.973037	0.763758
111	111-2	HMDB0002311	8,9-DiHETrE	Lipids and lipid-like molecules	Fatty Acyls	Eicosanoids	C14773	C20H34O4	-H2O-H	319.228	0.997003	0.787281	0.973037	0.763758
111	111-3	HMDB0002314	11,12-DiHETrE	Lipids and lipid-like molecules	Fatty Acyls	Eicosanoids	C14774	C20H34O4	-H2O-H	319.228	0.997003	0.787281	0.973037	0.763758
111	111-4	HMDB0002343	5,6-DHET	Lipids and lipid-like molecules	Fatty Acyls	Eicosanoids	C14772	C20H34O4	-H2O-H	319.228	0.997003	0.787281	0.973037	0.763758
111	111-5	HMDB0002995	12-Keto-tetrahydro-leukotriene B4	Lipids and lipid-like molecules	Fatty Acyls	Eicosanoids	C02165	C20H34O4	-H2O-H	319.228	0.997003	0.787281	0.973037	0.763758
111	111-6	HMDB0012504	10,11-dihydro-leukotriene B4	Lipids and lipid-like molecules	Fatty Acyls	Eicosanoids		C20H34O4	-H2O-H	319.228	0.997003	0.787281	0.973037	0.763758
111	111-7	HMDB0012838	6,7-dihydro-12-epi-LTB4	Lipids and lipid-like molecules	Fatty Acyls	Eicosanoids		C20H34O4	-H2O-H	319.228	0.997003	0.787281	0.973037	0.763758
111	111-8	HMDB0035379	Sterebin E	Lipids and lipid-like molecules	Prenol lipids	Diterpenoids		C20H34O4	-H2O-H	319.228	0.997003	0.787281	0.973037	0.763758
111	111-9	HMDB0060106	15-Hydroperoxyeicosa-8Z,11Z,13E-trienoate	Lipids and lipid-like molecules	Fatty Acyls	Eicosanoids		C20H34O4	-H2O-H	319.228	0.997003	0.787281	0.973037	0.763758
112	112-1	HMDB0042049	Trichloroethanol glucuronide	Organic oxygen compounds	Organooxygen compounds	Carbohydrates and carbohydrate conjugates	C14869	C8H11Cl3O7	-H	322.95	0.997108	0.789613	0.942939	0.742405
113	113-1	HMDB0000309	3a,16b-Dihydroxyandrostenone	Lipids and lipid-like molecules	Steroids and steroid derivatives	Androstane steroids		C19H28O3	+Na-2H	325.179	0.998823	0.693423	0.987392	0.683875
113	113-2	HMDB0000322	16-Oxoandrostenediol	Lipids and lipid-like molecules	Steroids and steroid derivatives	Androstane steroids		C19H28O3	+Na-2H	325.179	0.998823	0.693423	0.987392	0.683875
113	113-3	HMDB0000324	3a,16a-Dihydroxyandrostenone	Lipids and lipid-like molecules	Steroids and steroid derivatives	Androstane steroids		C19H28O3	+Na-2H	325.179	0.998823	0.693423	0.987392	0.683875
113	113-4	HMDB0000352	16a-Hydroxydehydroisoandrosterone	Lipids and lipid-like molecules	Steroids and steroid derivatives	Androstane steroids	C05139	C19H28O3	+Na-2H	325.179	0.998823	0.693423	0.987392	0.683875
113	113-5	HMDB0000388	3a,16-Dihydroxyandrostenone	Lipids and lipid-like molecules	Steroids and steroid derivatives	Androstane steroids		C19H28O3	+Na-2H	325.179	0.998823	0.693423	0.987392	0.683875
113	113-6	HMDB0004611	7a-Hydroxydehydroepiandrosterone	Lipids and lipid-like molecules	Steroids and steroid derivatives	Androstane steroids	C18045	C19H28O3	+Na-2H	325.179	0.998823	0.693423	0.987392	0.683875
113	113-7	HMDB0004624	7b-Hydroxydehydroepiandrosterone	Lipids and lipid-like molecules	Steroids and steroid derivatives	Androstane steroids		C19H28O3	+Na-2H	325.179	0.998823	0.693423	0.987392	0.683875
113	113-8	HMDB0006031	11-Ketoetiocholanolone	Lipids and lipid-like molecules	Steroids and steroid derivatives	Androstane steroids	C14552	C19H28O3	+Na-2H	325.179	0.998823	0.693423	0.987392	0.683875
113	113-9	HMDB0006259	6beta-Hydroxytestosterone	Lipids and lipid-like molecules	Steroids and steroid derivatives	Androstane steroids	C14497	C19H28O3	+Na-2H	325.179	0.998823	0.693423	0.987392	0.683875
113	113-10	HMDB0006769	19-Hydroxytestosterone	Lipids and lipid-like molecules	Steroids and steroid derivatives	Androstane steroids	C05294	C19H28O3	+Na-2H	325.179	0.998823	0.693423	0.987392	0.683875
113	113-11	HMDB0012533	11beta-Hydroxytestosterone	Lipids and lipid-like molecules	Steroids and steroid derivatives	Androstane steroids		C19H28O3	+Na-2H	325.179	0.998823	0.693423	0.987392	0.683875
113	113-12	HMDB0012654	2beta-Hydroxytestosterone	Lipids and lipid-like molecules	Sphingolipids	Phosphosphingolipids	C00550	C19H28O3	+Na-2H	325.179	0.998823	0.693423	0.987392	0.683875
113	113-13	HMDB0060089	w Hydroxy testosterone	Lipids and lipid-like molecules	Steroids and steroid derivatives	Androstane steroids	C05294	C19H28O3	+Na-2H	325.179	0.998823	0.693423	0.987392	0.683875
113	113-14	HMDB0060339	11beta,17beta-Dihydroxy-4-androsten-3-one	Lipids and lipid-like molecules	Steroids and steroid derivatives	Androstane steroids	C18075	C19H28O3	+Na-2H	325.179	0.998823	0.693423	0.987392	0.683875
114	114-1	HMDB0003039	Isoacitretin	Lipids and lipid-like molecules	Prenol lipids	Retinoids		C21H26O3	-H	325.181	0.999059	0.614342	0.976421	0.599293
115	115-1	HMDB0031031	2-Dodecylbenzenesulfonic acid	Benzenoids	Benzene and substituted derivatives	Benzenesulfonic acids and derivatives		C18H30O3S	-H	325.184	0.999182	0.654291	0.984534	0.643645
116	116-1	HMDB0061835	Heptaethylene glycol	Organic oxygen compounds	Organooxygen compounds	Ethers		C14H30O8	-H	325.187	0.998922	0.660387	0.991911	0.654339
117	117-1	HMDB0002925	Dihomo-gamma-linolenic acid	Lipids and lipid-like molecules	Fatty Acyls	Fatty acids and conjugates	C03242	C20H34O2	+Na-2H	327.231	0.996262	0.966882	0.998209	0.961543
117	117-2	HMDB0010378	5,8,11-Eicosatrienoic acid	Lipids and lipid-like molecules	Fatty Acyls	Fatty acids and conjugates		C20H34O2	+Na-2H	327.231	0.996262	0.966882	0.998209	0.961543
117	117-3	HMDB0031058	Sciadonic acid	Lipids and lipid-like molecules	Fatty Acyls	Fatty acids and conjugates		C20H34O2	+Na-2H	327.231	0.996262	0.966882	0.998209	0.961543
117	117-4	HMDB0036835	Sagittariol	Lipids and lipid-like molecules	Prenol lipids	Diterpenoids		C20H34O2	+Na-2H	327.231	0.996262	0.966882	0.998209	0.961543
117	117-5	HMDB0060039	Dihomo-alpha-linolenic acid	Lipids and lipid-like molecules	Fatty Acyls	Fatty acids and conjugates	C16522	C20H34O2	+Na-2H	327.231	0.996262	0.966882	0.998209	0.961543
118	118-1	HMDB0002183	Docosahexaenoic acid	Lipids and lipid-like molecules	Fatty Acyls	Fatty acids and conjugates	C06429	C22H32O2	-H	327.233	0.99629	0.973246	0.998682	0.968358
118	118-2	HMDB0030053	Neogrifolin	Lipids and lipid-like molecules	Prenol lipids	Sesquiterpenoids		C22H32O2	-H	327.233	0.99629	0.973246	0.998682	0.968358
118	118-3	HMDB0030446	Grifolin	Lipids and lipid-like molecules	Prenol lipids	Sesquiterpenoids		C22H32O2	-H	327.233	0.99629	0.973246	0.998682	0.968358
118	118-4	HMDB0035185	Retinol acetate	Lipids and lipid-like molecules	Prenol lipids	Retinoids		C22H32O2	-H	327.233	0.99629	0.973246	0.998682	0.968358
119	119-1	HMDB0005060	Eicosadienoic acid	Lipids and lipid-like molecules	Fatty Acyls	Fatty acids and conjugates	C16525	C20H36O2	+Na-2H	329.246	0.996318	0.971041	0.994492	0.962137
119	119-2	HMDB0036827	Sclareol	Lipids and lipid-like molecules	Prenol lipids	Diterpenoids	C09183	C20H36O2	+Na-2H	329.246	0.996318	0.971041	0.994492	0.962137
119	119-3	HMDB0062432	8Z,11Z-eicosadienoic acid	Lipids and lipid-like molecules	Fatty Acyls	Fatty acids and conjugates		C20H36O2	+Na-2H	329.246	0.996318	0.971041	0.994492	0.962137
120	120-1	HMDB0001976	Docosapentaenoic acid (22n-6)	Lipids and lipid-like molecules	Fatty Acyls	Fatty acids and conjugates		C22H34O2	-H	329.249	0.996515	0.97841	0.990908	0.966136
120	120-2	HMDB0032257	Ethyl abietate	Lipids and lipid-like molecules	Prenol lipids	Diterpenoids		C22H34O2	-H	329.249	0.996515	0.97841	0.990908	0.966136
120	120-3	HMDB0035024	ent-16-Kauren-19-ol acetate	Lipids and lipid-like molecules	Prenol lipids	Diterpenoids		C22H34O2	-H	329.249	0.996515	0.97841	0.990908	0.966136
120	120-4	HMDB0039133	4,8,12,15,19-Docosapentaenoic acid	Lipids and lipid-like molecules	Fatty Acyls	Fatty acids and conjugates		C22H34O2	-H	329.249	0.996515	0.97841	0.990908	0.966136
120	120-5	HMDB0039530	Ethyl icosapentate	Lipids and lipid-like molecules	Fatty Acyls	Fatty acid esters	C16184	C22H34O2	-H	329.249	0.996515	0.97841	0.990908	0.966136
121	121-1	HMDB0002226	Adrenic acid	Lipids and lipid-like molecules	Fatty Acyls	Fatty acids and conjugates	C16527	C22H36O2	-H	331.264	0.996341	0.864674	0.987161	0.850449
121	121-2	HMDB0035676	1-Hydroxy-1-phenyl-3-hexadecanone	Lipids and lipid-like molecules	Fatty Acyls	Fatty alcohols		C22H36O2	-H	331.264	0.996341	0.864674	0.987161	0.850449
121	121-3	HMDB0035677	3-Hydroxy-1-phenyl-1-hexadecanone	Lipids and lipid-like molecules	Fatty Acyls	Fatty alcohols		C22H36O2	-H	331.264	0.996341	0.864674	0.987161	0.850449
121	121-4	HMDB0062725	Ethyl Arachidonate	Lipids and lipid-like molecules	Fatty Acyls	Fatty acid esters		C22H36O2	-H	331.264	0.996341	0.864674	0.987161	0.850449
122	122-1	HMDB0040180	Pentadecylbenzene	Benzenoids	Benzene and substituted derivatives			C21H36	+HCOO	333.28	0.994892	0.504323	0.944702	0.474001
123	123-1	HMDB0001337	Leukotriene A4	Lipids and lipid-like molecules	Fatty Acyls	Fatty acids and conjugates	C00909	C20H30O3	+Na-2H	339.194	0.999051	0.577594	0.980243	0.565645
123	123-2	HMDB0005081	5-HEPE	Lipids and lipid-like molecules	Fatty Acyls	Eicosanoids		C20H30O3	+Na-2H	339.194	0.999051	0.577594	0.980243	0.565645
123	123-3	HMDB0010202	12-HEPE	Lipids and lipid-like molecules	Fatty Acyls	Eicosanoids		C20H30O3	+Na-2H	339.194	0.999051	0.577594	0.980243	0.565645
123	123-4	HMDB0010205	14,15-EpETE	Lipids and lipid-like molecules	Fatty Acyls	Fatty acids and conjugates		C20H30O3	+Na-2H	339.194	0.999051	0.577594	0.980243	0.565645
123	123-5	HMDB0010209	15-HEPE	Lipids and lipid-like molecules	Fatty Acyls	Eicosanoids		C20H30O3	+Na-2H	339.194	0.999051	0.577594	0.980243	0.565645
123	123-6	HMDB0010210	15-KETE	Lipids and lipid-like molecules	Fatty Acyls	Fatty acids and conjugates	C04577	C20H30O3	+Na-2H	339.194	0.999051	0.577594	0.980243	0.565645
123	123-7	HMDB0010212	17,18-EpETE	Lipids and lipid-like molecules	Fatty Acyls	Fatty acids and conjugates	C13843	C20H30O3	+Na-2H	339.194	0.999051	0.577594	0.980243	0.565645
123	123-8	HMDB0010217	5-KETE	Lipids and lipid-like molecules	Fatty Acyls	Fatty acids and conjugates	C14732	C20H30O3	+Na-2H	339.194	0.999051	0.577594	0.980243	0.565645
123	123-9	HMDB0012534	11R-HEPE	Lipids and lipid-like molecules	Fatty Acyls	Eicosanoids		C20H30O3	+Na-2H	339.194	0.999051	0.577594	0.980243	0.565645
123	123-10	HMDB0012611	18R-HEPE	Lipids and lipid-like molecules	Fatty Acyls	Eicosanoids		C20H30O3	+Na-2H	339.194	0.999051	0.577594	0.980243	0.565645
123	123-11	HMDB0013633	12-KETE	Lipids and lipid-like molecules	Fatty Acyls	Fatty acids and conjugates	C14807	C20H30O3	+Na-2H	339.194	0.999051	0.577594	0.980243	0.565645
123	123-12	HMDB0030101	Methyl [8]-Shogaol	Benzenoids	Benzene and substituted derivatives	Methoxybenzenes		C20H30O3	+Na-2H	339.194	0.999051	0.577594	0.980243	0.565645
123	123-13	HMDB0035116	(ent-7alpha)-7-Hydroxy-8(14),15-pimaradien-19-oic acid	Lipids and lipid-like molecules	Prenol lipids	Diterpenoids		C20H30O3	+Na-2H	339.194	0.999051	0.577594	0.980243	0.565645
123	123-14	HMDB0036698	Ineketone	Lipids and lipid-like molecules	Prenol lipids	Diterpenoids	C09110	C20H30O3	+Na-2H	339.194	0.999051	0.577594	0.980243	0.565645
123	123-15	HMDB0036706	Steviol	Lipids and lipid-like molecules	Prenol lipids	Diterpenoids		C20H30O3	+Na-2H	339.194	0.999051	0.577594	0.980243	0.565645
123	123-16	HMDB0036712	Yucalexin B20	Lipids and lipid-like molecules	Prenol lipids	Diterpenoids		C20H30O3	+Na-2H	339.194	0.999051	0.577594	0.980243	0.565645
123	123-17	HMDB0036713	Yucalexin B22	Lipids and lipid-like molecules	Prenol lipids	Diterpenoids		C20H30O3	+Na-2H	339.194	0.999051	0.577594	0.980243	0.565645
123	123-18	HMDB0036724	ent-17-Hydroxy-15-kauren-19-oic acid	Lipids and lipid-like molecules	Prenol lipids	Diterpenoids		C20H30O3	+Na-2H	339.194	0.999051	0.577594	0.980243	0.565645
123	123-19	HMDB0036752	Yucalexin P17	Lipids and lipid-like molecules	Prenol lipids	Diterpenoids		C20H30O3	+Na-2H	339.194	0.999051	0.577594	0.980243	0.565645
123	123-20	HMDB0036776	Yucalexin A19	Lipids and lipid-like molecules	Prenol lipids	Diterpenoids		C20H30O3	+Na-2H	339.194	0.999051	0.577594	0.980243	0.565645
123	123-21	HMDB0036806	Aframodial	Lipids and lipid-like molecules	Prenol lipids	Diterpenoids		C20H30O3	+Na-2H	339.194	0.999051	0.577594	0.980243	0.565645
123	123-22	HMDB0036839	(ent-15beta)-15-Hydroxy-19-trachylobanoic acid	Lipids and lipid-like molecules	Prenol lipids	Diterpenoids		C20H30O3	+Na-2H	339.194	0.999051	0.577594	0.980243	0.565645
123	123-23	HMDB0036930	Grandiflorolic acid	Lipids and lipid-like molecules	Prenol lipids	Diterpenoids		C20H30O3	+Na-2H	339.194	0.999051	0.577594	0.980243	0.565645
123	123-24	HMDB0037523	Galanolactone	Organoheterocyclic compounds	Lactones	Gamma butyrolactones	C17498	C20H30O3	+Na-2H	339.194	0.999051	0.577594	0.980243	0.565645
123	123-25	HMDB0039012	(ent-15beta)-15,19-Dihydroxy-7-trachylobanone	Lipids and lipid-like molecules	Prenol lipids	Diterpenoids		C20H30O3	+Na-2H	339.194	0.999051	0.577594	0.980243	0.565645
123	123-26	HMDB0039716	12alpha-12-Hydroxy-7,13-abietadien-18-oic acid	Lipids and lipid-like molecules	Prenol lipids	Diterpenoids		C20H30O3	+Na-2H	339.194	0.999051	0.577594	0.980243	0.565645
123	123-27	HMDB0041058	Phytocassane C	Lipids and lipid-like molecules	Prenol lipids	Diterpenoids		C20H30O3	+Na-2H	339.194	0.999051	0.577594	0.980243	0.565645
123	123-28	HMDB0060053	9-HEPE	Lipids and lipid-like molecules	Fatty Acyls	Eicosanoids		C20H30O3	+Na-2H	339.194	0.999051	0.577594	0.980243	0.565645
123	123-29	HMDB0062222	18R-hydroxy-5Z,8Z,11Z,14Z,16E-eicosapentaenoic acid	Lipids and lipid-like molecules	Fatty Acyls	Eicosanoids	C18177	C20H30O3	+Na-2H	339.194	0.999051	0.577594	0.980243	0.565645
123	123-30	HMDB0062293	15R-hydroxy-5Z,8Z,11Z,13E,17Z-eicosapentaenoic acid	Lipids and lipid-like molecules	Fatty Acyls	Eicosanoids		C20H30O3	+Na-2H	339.194	0.999051	0.577594	0.980243	0.565645
123	123-31	HMDB0062296	15S-hydroxy-5Z,8Z,11Z,13E,17Z-eicosapentaenoic acid	Lipids and lipid-like molecules	Fatty Acyls	Eicosanoids		C20H30O3	+Na-2H	339.194	0.999051	0.577594	0.980243	0.565645
123	123-32	HMDB0062408	5S-hydroxy-6E,8Z,11Z,14Z,17Z-eicosapentaenoic acid	Lipids and lipid-like molecules	Fatty Acyls	Eicosanoids		C20H30O3	+Na-2H	339.194	0.999051	0.577594	0.980243	0.565645
124	124-1	HMDB0010213	17-HDoHE	Lipids and lipid-like molecules	Fatty Acyls	Fatty acids and conjugates		C22H32O3	-H	343.228	0.996436	0.561203	0.950579	0.531566
124	124-2	HMDB0013620	19(20)-EpDPE	Lipids and lipid-like molecules	Fatty Acyls	Lineolic acids and derivatives		C22H32O3	-H	343.228	0.996436	0.561203	0.950579	0.531566
124	124-3	HMDB0013621	16(17)-EpDPE	Lipids and lipid-like molecules	Fatty Acyls	Fatty acids and conjugates		C22H32O3	-H	343.228	0.996436	0.561203	0.950579	0.531566
124	124-4	HMDB0039885	3-Hydroxyneogrifolin	Lipids and lipid-like molecules	Prenol lipids	Sesquiterpenoids		C22H32O3	-H	343.228	0.996436	0.561203	0.950579	0.531566
124	124-5	HMDB0060037	10-HDoHE	Lipids and lipid-like molecules	Fatty Acyls	Fatty acids and conjugates		C22H32O3	-H	343.228	0.996436	0.561203	0.950579	0.531566
124	124-6	HMDB0060040	11-HDoHE	Lipids and lipid-like molecules	Fatty Acyls	Fatty acids and conjugates		C22H32O3	-H	343.228	0.996436	0.561203	0.950579	0.531566
124	124-7	HMDB0060047	16-HDoHE	Lipids and lipid-like molecules	Fatty Acyls	Fatty acids and conjugates		C22H32O3	-H	343.228	0.996436	0.561203	0.950579	0.531566
124	124-8	HMDB0060048	20-HDoHE	Lipids and lipid-like molecules	Fatty Acyls	Fatty acids and conjugates		C22H32O3	-H	343.228	0.996436	0.561203	0.950579	0.531566
124	124-9	HMDB0060049	4-HDoHE	Lipids and lipid-like molecules	Fatty Acyls	Fatty acids and conjugates		C22H32O3	-H	343.228	0.996436	0.561203	0.950579	0.531566
124	124-10	HMDB0060050	7-HDoHE	Lipids and lipid-like molecules	Fatty Acyls	Fatty acids and conjugates		C22H32O3	-H	343.228	0.996436	0.561203	0.950579	0.531566
124	124-11	HMDB0060051	8-HDoHE	Lipids and lipid-like molecules	Fatty Acyls	Fatty acids and conjugates		C22H32O3	-H	343.228	0.996436	0.561203	0.950579	0.531566
124	124-12	HMDB0060112	4-Hydroxy-all-trans-retinyl acetate	Lipids and lipid-like molecules	Prenol lipids	Retinoids		C22H32O3	-H	343.228	0.996436	0.561203	0.950579	0.531566
125	125-1	HMDB0014096	5'-Hydroxypiroxicam	Organoheterocyclic compounds	Benzothiazines			C15H13N3O5S	-H	346.05	0.99769	0.595585	0.95821	0.569377
126	126-1	HMDB0059997	Dihyroxy-1H-indole glucuronide I	Organic oxygen compounds	Organooxygen compounds	Carbohydrates and carbohydrate conjugates		C14H15NO8	+Na-2H	346.054	0.99797	0.795266	0.976547	0.775038
127	127-1	HMDB0001062	N-Acetyl-D-Glucosamine 6-Phosphate	Organic oxygen compounds	Organooxygen compounds	Carbohydrates and carbohydrate conjugates	C00357	C8H16NO9P	+HCOO	346.054	0.997967	0.759322	0.990506	0.750583
127	127-2	HMDB0001121	N-Acetyl-D-mannosamine 6-phosphate	Organic oxygen compounds	Organooxygen compounds	Carbohydrates and carbohydrate conjugates	C04257	C8H16NO9P	+HCOO	346.054	0.997967	0.759322	0.990506	0.750583
127	127-3	HMDB0001367	N-Acetyl-glucosamine 1-phosphate	Organic oxygen compounds	Organooxygen compounds	Carbohydrates and carbohydrate conjugates	C04256	C8H16NO9P	+HCOO	346.054	0.997967	0.759322	0.990506	0.750583
128	128-1	HMDB0000045	Adenosine monophosphate	Nucleosides, nucleotides, and analogues	Purine nucleotides	Purine ribonucleotides	C00020	C10H14N5O7P	-H	346.056	0.998043	0.793076	0.990698	0.784161
128	128-2	HMDB0001044	2'-Deoxyguanosine 5'-monophosphate	Nucleosides, nucleotides, and analogues	Purine nucleotides	Purine deoxyribonucleotides	C00362	C10H14N5O7P	-H	346.056	0.998043	0.793076	0.990698	0.784161
128	128-3	HMDB0003540	3'-AMP	Nucleosides, nucleotides, and analogues	Ribonucleoside 3'-phosphates		C01367	C10H14N5O7P	-H	346.056	0.998043	0.793076	0.990698	0.784161
128	128-4	HMDB0011617	Adenosine 2'-phosphate	Organic oxygen compounds	Organooxygen compounds	Carbohydrates and carbohydrate conjugates	C00946	C10H14N5O7P	-H	346.056	0.998043	0.793076	0.990698	0.784161
129	129-1	HMDB0029199	Fertaric acid	Phenylpropanoids and polyketides	Cinnamic acids and derivatives	Hydroxycinnamic acids and derivatives		C14H14O9	+Na-2H	347.038	0.998424	0.625507	0.966255	0.603446
130	130-1	HMDB0012152	2-O-(6-Phospho-alpha-mannosyl)-D-glycerate	Organic oxygen compounds	Organooxygen compounds	Carbohydrates and carbohydrate conjugates	C16699	C9H17O12P	-H	347.038	0.99861	0.64484	0.981825	0.63224
131	131-1	HMDB0000175	Inosinic acid	Nucleosides, nucleotides, and analogues	Purine nucleotides	Purine ribonucleotides	C00130	C10H13N4O8P	-H	347.04	0.998557	0.63138	0.979236	0.617378
131	131-2	HMDB0011681	Inosine 2'-phosphate	Organic oxygen compounds	Organooxygen compounds	Carbohydrates and carbohydrate conjugates		C10H13N4O8P	-H	347.04	0.998557	0.63138	0.979236	0.617378
132	132-1	HMDB0029620	Tricetin	Phenylpropanoids and polyketides	Flavonoids	Flavones	C10192	C15H10O7	+HCOO	347.041	0.998504	0.629674	0.957825	0.602215
132	132-2	HMDB0030796	Morin	Phenylpropanoids and polyketides	Flavonoids	Flavones	C10105	C15H10O7	+HCOO	347.041	0.998504	0.629674	0.957825	0.602215
133	133-1	HMDB0060031	5-(3',5'-Dihydroxyphenyl)-gamma-valerolactone-O-sulphate-O-methyl	Organic acids and derivatives	Organic sulfuric acids and derivatives	Arylsulfates		C12H14O7S	+HCOO	347.044	0.998749	0.565129	0.959449	0.541534
134	134-1	HMDB0002823	Docosatrienoic acid	Lipids and lipid-like molecules	Fatty Acyls	Fatty acids and conjugates		C22H38O2	+Na-2H	355.262	0.996582	0.678831	0.970559	0.656593
134	134-2	HMDB0031099	(all-Z)-7,10,13-Docosatrienoic acid	Lipids and lipid-like molecules	Fatty Acyls	Fatty acids and conjugates		C22H38O2	+Na-2H	355.262	0.996582	0.678831	0.970559	0.656593
135	135-1	HMDB0002007	Tetracosahexaenoic acid	Lipids and lipid-like molecules	Fatty Acyls	Fatty acids and conjugates		C24H36O2	-H	355.264	0.996033	0.712634	0.958685	0.680481
135	135-2	HMDB0060117	Tetracosahexaenoic acid, n-3	Lipids and lipid-like molecules	Fatty Acyls	Fatty acids and conjugates		C24H36O2	-H	355.264	0.996033	0.712634	0.958685	0.680481
136	136-1	HMDB0011533	MG(16:0)	Lipids and lipid-like molecules	Glycerolipids	Monoradylglycerols		C19H38O4	+Cl	365.245	0.998612	0.881922	0.987736	0.869897
137	137-1	HMDB0035582	1-Phenyl-1,3-heptadecanedione	Organic oxygen compounds	Organooxygen compounds	Carbonyl compounds		C23H36O2	+Na-2H	365.246	0.998596	0.870878	0.981388	0.853469
138	138-1	HMDB0034952	Persicaxanthin	Lipids and lipid-like molecules	Prenol lipids	Diterpenoids		C25H36O3	-H2O-H	365.249	0.998459	0.813224	0.973384	0.79036
138	138-2	HMDB0036425	Persicachrome	Lipids and lipid-like molecules	Prenol lipids	Diterpenoids		C25H36O3	-H2O-H	365.249	0.998459	0.813224	0.973384	0.79036
139	139-1	HMDB0013649	Eicosapentaenoyl Ethanolamide	Organic nitrogen compounds	Organonitrogen compounds	Amines		C22H35NO2	+Na-2H	366.242	0.997643	0.532757	0.546795	0.290622
140	140-1	HMDB0015498	Aprindine	Benzenoids	Indanes			C22H30N2	+HCOO	367.239	0.998696	0.52367	0.952318	0.49805
141	141-1	HMDB0003180	Cortol	Lipids and lipid-like molecules	Steroids and steroid derivatives	Hydroxysteroids	C05482	C21H36O5	-H	367.249	0.998665	0.63022	0.95713	0.602397
141	141-2	HMDB0005821	beta-Cortol	Organic oxygen compounds	Organooxygen compounds	Carbohydrates and carbohydrate conjugates	C01235	C21H36O5	-H	367.249	0.998665	0.63022	0.95713	0.602397
141	141-3	HMDB0037961	gamma-Eudesmol rhamnoside	Lipids and lipid-like molecules	Prenol lipids	Sesquiterpenoids		C21H36O5	-H	367.249	0.998665	0.63022	0.95713	0.602397
142	142-1	HMDB0003166	16b-Hydroxystanozolol	Lipids and lipid-like molecules	Steroids and steroid derivatives	Estrane steroids		C21H32N2O2	+HCOO	389.245	0.997335	0.78914	0.974648	0.767084
142	142-2	HMDB0003318	4b-Hydroxystanozolol	Lipids and lipid-like molecules	Steroids and steroid derivatives	Estrane steroids		C21H32N2O2	+HCOO	389.245	0.997335	0.78914	0.974648	0.767084
142	142-3	HMDB0006001	3'-Hydroxystanozolol	Lipids and lipid-like molecules	Steroids and steroid derivatives	Estrane steroids		C21H32N2O2	+HCOO	389.245	0.997335	0.78914	0.974648	0.767084
143	143-1	HMDB0011538	MG(18:2)	Lipids and lipid-like molecules	Fatty Acyls	Lineolic acids and derivatives		C21H38O4	+Cl	389.245	0.997393	0.787725	0.966475	0.759332
144	144-1	HMDB0036013	(R)-3,4-Dihydro-2-(4,8,12-trimethyl-3,7,11-tridecatrienyl)-2H-1-benzopyran-6-ol	Lipids and lipid-like molecules	Prenol lipids	Diterpenoids		C25H36O2	+Na-2H	389.246	0.997355	0.788516	0.970939	0.763576
144	144-2	HMDB0036054	12'-Apo-b-carotene-3,12'-diol	Lipids and lipid-like molecules	Prenol lipids	Diterpenoids		C25H36O2	+Na-2H	389.246	0.997355	0.788516	0.970939	0.763576
145	145-1	HMDB0039018	Apo-10'-violaxanthal	Lipids and lipid-like molecules	Prenol lipids	Sesterterpenoids		C27H36O3	-H2O-H	389.249	0.997333	0.810234	0.934124	0.75484
146	146-1	HMDB0061637	3-hydroxyundecanoyl carnitine	Lipids and lipid-like molecules	Fatty Acyls	Fatty acid esters		C18H35NO5	+HCOO	390.25	0.995926	0.70891	0.788623	0.556785
147	147-1	HMDB0011536	MG(18:1)	Lipids and lipid-like molecules	Glycerolipids	Monoradylglycerols		C21H40O4	+Cl	391.261	0.997584	0.760081	0.935454	0.709303
147	147-2	HMDB0033372	Stearoyllactic acid	Lipids and lipid-like molecules	Fatty Acyls	Fatty acid esters		C21H40O4	+Cl	391.261	0.997584	0.760081	0.935454	0.709303
147	147-3	HMDB0034031	3-(2-Heptenyloxy)-2-hydroxypropyl undecanoate	Lipids and lipid-like molecules	Glycerolipids	Diradylglycerols		C21H40O4	+Cl	391.261	0.997584	0.760081	0.935454	0.709303
148	148-1	HMDB0039019	3-Hydroxy-10'-apo-b,y-carotenal	Lipids and lipid-like molecules	Prenol lipids	Sesterterpenoids		C27H36O2	-H	391.264	0.997388	0.724296	0.727917	0.525851
149	149-1	HMDB0013658	Docosahexaenoyl Ethanolamide	Organic nitrogen compounds	Organonitrogen compounds	Amines		C24H37NO2	+Na-2H	392.257	0.996863	0.508908	0.510632	0.25905
150	150-1	HMDB0015648	Fesoterodine	Benzenoids	Benzene and substituted derivatives	Diphenylmethanes		C26H37NO3	-H2O-H	392.26	0.997334	0.556552	0.530973	0.294726
151	151-1	HMDB0011131	MG(18:0)	Lipids and lipid-like molecules	Glycerolipids	Monoradylglycerols		C21H42O4	+Cl	393.277	0.998476	0.891417	0.993133	0.883946
152	152-1	HMDB0035584	1-Phenyl-1,3-nonadecanedione	Organic oxygen compounds	Organooxygen compounds	Carbonyl compounds		C25H40O2	+Na-2H	393.278	0.998424	0.86135	0.976688	0.839945
152	152-2	HMDB0039867	5-(10,13-Nonadecadienyl)-1,3-benzenediol	Benzenoids	Phenols	Benzenediols		C25H40O2	+Na-2H	393.278	0.998424	0.86135	0.976688	0.839945
153	153-1	HMDB0038506	7,8-Dehydro-beta-micropteroxanthin	Lipids and lipid-like molecules	Prenol lipids	Sesquiterpenoids		C27H38O2	-H	393.28	0.998514	0.825831	0.977321	0.805903
154	154-1	HMDB0060062	Sphingosine 1-phosphate (d19:1-P)	Lipids and lipid-like molecules	Sphingolipids	Phosphosphingolipids		C19H42NO5P	-H	394.273	0.998341	0.75003	0.538332	0.403095
155	155-1	HMDB0062332	N-Docosahexaenoyl GABA	Organic acids and derivatives	Carboxylic acids and derivatives	Amino acids, peptides, and analogues		C26H39NO3	-H2O-H	394.275	0.99863	0.736006	0.640992	0.471128
156	156-1	HMDB0035516	5-Decanoyl-2-nonylpyridine	Organic oxygen compounds	Organooxygen compounds	Carbonyl compounds		C24H41NO	+Cl	394.287	0.998695	0.572764	0.891909	0.510187
157	157-1	HMDB0010331	Palmitoyl glucuronide	Lipids and lipid-like molecules	Fatty Acyls	Fatty acyl glycosides	C03033	C22H42O7	-H2O-H	399.275	0.996845	0.571422	0.9568	0.545012
158	158-1	HMDB0004666	MG(20:4)	Lipids and lipid-like molecules	Endocannabinoids		C13856	C23H38O4	+Cl	413.245	0.996025	0.589876	0.905438	0.531973
158	158-2	HMDB0035273	1-Acetoxy-2-hydroxy-5,12,15-heneicosatrien-4-one	Lipids and lipid-like molecules	Fatty Acyls	Fatty alcohols		C23H38O4	+Cl	413.245	0.996025	0.589876	0.905438	0.531973
158	158-3	HMDB0036568	Persenone A	Lipids and lipid-like molecules	Fatty Acyls	Fatty alcohols		C23H38O4	+Cl	413.245	0.996025	0.589876	0.905438	0.531973
159	159-1	HMDB0039883	Ascorbyl palmitate	Lipids and lipid-like molecules	Fatty Acyls	Fatty acid esters		C22H38O7	-H	413.254	0.995979	0.547843	0.590539	0.322222
160	160-1	HMDB0000907	Sulfolithocholic acid	Lipids and lipid-like molecules	Steroids and steroid derivatives	Bile acids, alcohols and derivatives		C24H40O6S	-H2O-H	437.237	0.996063	0.59496	0.599758	0.355428
161	161-1	HMDB0000541	7b-Hydroxy-3-oxo-5b-cholanoic acid	Lipids and lipid-like molecules	Steroids and steroid derivatives	Bile acids, alcohols and derivatives		C25H38O4	+Cl	437.245	0.996796	0.68313	0.924537	0.629555
161	161-2	HMDB0011557	MG(22:6)	Lipids and lipid-like molecules	Glycerolipids	Monoradylglycerols		C25H38O4	+Cl	437.245	0.996796	0.68313	0.924537	0.629555
162	162-1	HMDB0060730	20, 22-Dihydrodigoxigenin	Lipids and lipid-like molecules	Steroids and steroid derivatives	Steroid lactones		C23H36O5	+HCOO	437.255	0.996509	0.651617	0.524861	0.340814
163	163-1	HMDB0013961	O-Desmethylverapamil (D-702)	Benzenoids	Benzene and substituted derivatives	Phenylbutylamines		C26H36N2O4	-H	439.26	0.994872	0.592812	0.953669	0.562447
163	163-2	HMDB0014246	O-Desmethylverapamil (D-703)	Benzenoids	Benzene and substituted derivatives	Phenylbutylamines		C26H36N2O4	-H	439.26	0.994872	0.592812	0.953669	0.562447
163	163-3	HMDB0060540	Norverapamil	Benzenoids	Benzene and substituted derivatives	Phenylbutylamines		C26H36N2O4	-H	439.26	0.994872	0.592812	0.953669	0.562447
164	164-1	HMDB0011555	MG(22:5)	Lipids and lipid-like molecules	Glycerolipids	Monoradylglycerols		C25H40O4	+Cl	439.261	0.995359	0.545003	0.895849	0.485974
164	164-2	HMDB0012517	11'-Carboxy-gamma-chromanol	Lipids and lipid-like molecules	Prenol lipids	Sesquiterpenoids		C25H40O4	+Cl	439.261	0.995359	0.545003	0.895849	0.485974
165	165-1	HMDB0062591	Prostaglandin G2 2-glyceryl Ester	Lipids and lipid-like molecules	Fatty Acyls	Eicosanoids		C23H38O8	-H	441.249	0.997649	0.700918	0.944922	0.660756
166	166-1	HMDB0006227	1-a,24R,25-Trihydroxyvitamin D2	Lipids and lipid-like molecules	Steroids and steroid derivatives	Vitamin D and derivatives		C28H44O4	+Na-2H	465.299	0.996914	0.703278	0.969825	0.679952
166	166-2	HMDB0032667	5,9-Epidioxy-3-hydroxyergost-7-en-6-one	Lipids and lipid-like molecules	Steroids and steroid derivatives	Ergostane steroids		C28H44O4	+Na-2H	465.299	0.996914	0.703278	0.969825	0.679952
166	166-3	HMDB0032691	(3beta,5alpha,6alpha,7beta,14alpha,22E,24R)-5,6-Epoxyergosta-8,22-diene-3,7,14-triol	Lipids and lipid-like molecules	Steroids and steroid derivatives	Ergostane steroids		C28H44O4	+Na-2H	465.299	0.996914	0.703278	0.969825	0.679952
166	166-4	HMDB0033647	5,6:8,9-Diepoxyergost-22-ene-3,7beta-diol	Lipids and lipid-like molecules	Steroids and steroid derivatives	Ergostane steroids		C28H44O4	+Na-2H	465.299	0.996914	0.703278	0.969825	0.679952
166	166-5	HMDB0038977	(3beta,5alpha,6beta,9alpha,22E,24R)-5,9-Epidioxyergosta-7,22-diene-3,6-diol	Lipids and lipid-like molecules	Steroids and steroid derivatives	Ergostane steroids		C28H44O4	+Na-2H	465.299	0.996914	0.703278	0.969825	0.679952
167	167-1	HMDB0062315	1-eicosanoyl-glycero-3-phosphate	Lipids and lipid-like molecules	Glycerophospholipids	Glycerophosphates		C23H47O7P	-H	465.299	0.996917	0.704672	0.98636	0.692918
167	167-2	HMDB0114767	LysoPA(20:0)	Lipids and lipid-like molecules	Glycerophospholipids	Glycerophosphates		C23H47O7P	-H	465.299	0.996917	0.704672	0.98636	0.692918
168	168-1	HMDB0034512	Liquoric acid	Lipids and lipid-like molecules	Prenol lipids	Triterpenoids		C30H44O5	-H2O-H	465.301	0.99678	0.709003	0.959779	0.678295
168	168-2	HMDB0035256	24-Hydroxyglabrolide	Lipids and lipid-like molecules	Prenol lipids	Triterpenoids		C30H44O5	-H2O-H	465.301	0.99678	0.709003	0.959779	0.678295
168	168-3	HMDB0037607	Ganolucidic acid E	Lipids and lipid-like molecules	Prenol lipids	Triterpenoids		C30H44O5	-H2O-H	465.301	0.99678	0.709003	0.959779	0.678295
168	168-4	HMDB0039689	21-Hydroxyisoglabrolide	Lipids and lipid-like molecules	Prenol lipids	Triterpenoids		C30H44O5	-H2O-H	465.301	0.99678	0.709003	0.959779	0.678295
169	169-1	HMDB0000653	Cholesterol sulfate	Lipids and lipid-like molecules	Steroids and steroid derivatives	Cholestane steroids	C18043	C27H46O4S	-H	465.304	0.996791	0.655326	0.960888	0.627675
170	170-1	HMDB0034102	N-Nitrosotomatidine	Lipids and lipid-like molecules	Steroids and steroid derivatives	Steroidal alkaloids		C27H44N2O3	+Na-2H	465.31	0.996928	0.587055	0.972127	0.568939
171	171-1	HMDB0039015	Tangeraxanthin	Lipids and lipid-like molecules	Prenol lipids	Triterpenoids		C34H44O2	-H2O-H	465.316	0.9969	0.532122	0.919347	0.487688
172	172-1	HMDB0011662	3-beta-Hydroxy-4-beta-methyl-5-alpha-cholest-7-ene-4-alpha-carboxylate	Lipids and lipid-like molecules	Steroids and steroid derivatives	Cholestane steroids	C04840	C29H48O3	+Na-2H	465.335	0.991714	0.664373	0.933211	0.614863
172	172-2	HMDB0012165	4alpha-Carboxy-4beta-methyl-5alpha-cholesta-8-en-3beta-ol	Lipids and lipid-like molecules	Prenol lipids	Triterpenoids		C29H48O3	+Na-2H	465.335	0.991714	0.664373	0.933211	0.614863
172	172-3	HMDB0033633	(3beta,5alpha,6beta,22E,24R)-23-Methylergosta-7,22-diene-3,5,6-triol	Lipids and lipid-like molecules	Steroids and steroid derivatives	Ergostane steroids		C29H48O3	+Na-2H	465.335	0.991714	0.664373	0.933211	0.614863
172	172-4	HMDB0035804	Schleicherastatin 5	Lipids and lipid-like molecules	Steroids and steroid derivatives	Stigmastanes and derivatives		C29H48O3	+Na-2H	465.335	0.991714	0.664373	0.933211	0.614863
172	172-5	HMDB0062384	4α-carboxy-4β-methyl-5α-cholesta-8-en-3β-ol	Lipids and lipid-like molecules	Prenol lipids	Triterpenoids		C29H48O3	+Na-2H	465.335	0.991714	0.664373	0.933211	0.614863
173	173-1	HMDB0002972	Vitamin K1 2,3-epoxide	Lipids and lipid-like molecules	Prenol lipids	Quinone and hydroquinone lipids	C05849	C31H46O3	-H	465.338	0.991303	0.640664	0.922851	0.586095
174	174-1	HMDB0012082	LysoSM(d18:0)	Lipids and lipid-like molecules	Sphingolipids	Phosphosphingolipids		C23H51N2O5P	-H	465.346	0.991092	0.660621	0.951822	0.623192
175	175-1	HMDB0033256	(20S,24E)-20,26-Dihydroxy-24-dammaren-3-one	Lipids and lipid-like molecules	Prenol lipids	Triterpenoids		C30H50O3	+Na-2H	479.351	0.993587	0.647388	0.92475	0.594833
175	175-2	HMDB0034549	22alpha-Hydroxyerythrodiol	Lipids and lipid-like molecules	Prenol lipids	Triterpenoids		C30H50O3	+Na-2H	479.351	0.993587	0.647388	0.92475	0.594833
175	175-3	HMDB0034643	Longispinogenin	Lipids and lipid-like molecules	Prenol lipids	Triterpenoids		C30H50O3	+Na-2H	479.351	0.993587	0.647388	0.92475	0.594833
175	175-4	HMDB0034648	Soyasapogenol B	Lipids and lipid-like molecules	Prenol lipids	Triterpenoids	C08980	C30H50O3	+Na-2H	479.351	0.993587	0.647388	0.92475	0.594833
175	175-5	HMDB0034656	(3xi,16xi,21xi)-12-Ursene-3,16,21-triol	Lipids and lipid-like molecules	Prenol lipids	Triterpenoids		C30H50O3	+Na-2H	479.351	0.993587	0.647388	0.92475	0.594833
175	175-6	HMDB0035034	Heliantriol B2	Lipids and lipid-like molecules	Prenol lipids	Triterpenoids		C30H50O3	+Na-2H	479.351	0.993587	0.647388	0.92475	0.594833
175	175-7	HMDB0035324	Lucidumol B	Organic oxygen compounds	Organooxygen compounds	Carbohydrates and carbohydrate conjugates		C30H50O3	+Na-2H	479.351	0.993587	0.647388	0.92475	0.594833
175	175-8	HMDB0036433	(3beta,24xi)-Cycloart-25-ene-3,24,27-triol	Lipids and lipid-like molecules	Steroids and steroid derivatives	Cycloartanols and derivatives		C30H50O3	+Na-2H	479.351	0.993587	0.647388	0.92475	0.594833
175	175-9	HMDB0036540	Heliantriol A1	Lipids and lipid-like molecules	Prenol lipids	Triterpenoids		C30H50O3	+Na-2H	479.351	0.993587	0.647388	0.92475	0.594833
175	175-10	HMDB0038799	Coriandrinonediol	Lipids and lipid-like molecules	Prenol lipids	Triterpenoids		C30H50O3	+Na-2H	479.351	0.993587	0.647388	0.92475	0.594833
175	175-11	HMDB0038800	Heterobetulin	Lipids and lipid-like molecules	Prenol lipids	Triterpenoids		C30H50O3	+Na-2H	479.351	0.993587	0.647388	0.92475	0.594833
175	175-12	HMDB0038801	Heliantriol B1	Lipids and lipid-like molecules	Prenol lipids	Triterpenoids		C30H50O3	+Na-2H	479.351	0.993587	0.647388	0.92475	0.594833
175	175-13	HMDB0038802	Heliantriol C	Lipids and lipid-like molecules	Prenol lipids	Triterpenoids		C30H50O3	+Na-2H	479.351	0.993587	0.647388	0.92475	0.594833
175	175-14	HMDB0038803	Heliantriol F	Lipids and lipid-like molecules	Prenol lipids	Triterpenoids		C30H50O3	+Na-2H	479.351	0.993587	0.647388	0.92475	0.594833
175	175-15	HMDB0039212	Soyasapogenol F	Lipids and lipid-like molecules	Prenol lipids	Triterpenoids	C17421	C30H50O3	+Na-2H	479.351	0.993587	0.647388	0.92475	0.594833
175	175-16	HMDB0040553	(3b,24x)-Cycloartane-3-oxo-24,25-diol	Lipids and lipid-like molecules	Steroids and steroid derivatives	Cycloartanols and derivatives		C30H50O3	+Na-2H	479.351	0.993587	0.647388	0.92475	0.594833
175	175-17	HMDB0041183	(2alpha,3beta)-20(29)-Lupene-2,3,28-triol	Lipids and lipid-like molecules	Prenol lipids	Triterpenoids		C30H50O3	+Na-2H	479.351	0.993587	0.647388	0.92475	0.594833
175	175-18	HMDB0041533	Quasiprotopanaxatriol	Lipids and lipid-like molecules	Prenol lipids	Triterpenoids		C30H50O3	+Na-2H	479.351	0.993587	0.647388	0.92475	0.594833
176	176-1	HMDB0032022	Tsugaric acid A	Lipids and lipid-like molecules	Prenol lipids	Triterpenoids		C32H50O4	-H2O-H	479.353	0.992251	0.666718	0.920219	0.608773
176	176-2	HMDB0036008	Acetylursolic acid	Lipids and lipid-like molecules	Prenol lipids	Triterpenoids		C32H50O4	-H2O-H	479.353	0.992251	0.666718	0.920219	0.608773
176	176-3	HMDB0036674	Ursololactone	Lipids and lipid-like molecules	Prenol lipids	Triterpenoids		C32H50O4	-H2O-H	479.353	0.992251	0.666718	0.920219	0.608773
177	177-1	HMDB0035973	Lucidenic acid M	Phenylpropanoids and polyketides	Flavonoids	O-methylated flavonoids	C10029	C27H42O6	+Na-2H	483.273	0.996376	0.539605	0.936879	0.503712
178	178-1	HMDB0240601	LysoPG(16:0)	Lipids and lipid-like molecules	Glycerophospholipids	Glycerophosphoglycerols		C22H45O9P	-H	483.273	0.996357	0.538675	0.953873	0.511956
179	179-1	HMDB0034227	alpha-Tocopherol acetate	Lipids and lipid-like molecules	Prenol lipids	Quinone and hydroquinone lipids		C31H52O3	+Na-2H	493.366	0.991502	0.635873	0.928837	0.585603
179	179-2	HMDB0034507	Soyasapogenol D	Lipids and lipid-like molecules	Prenol lipids	Triterpenoids	C17423	C31H52O3	+Na-2H	493.366	0.991502	0.635873	0.928837	0.585603
180	180-1	HMDB0035267	Methyl 3b-hydroxy-13(18)-oleanen-28-oate	Lipids and lipid-like molecules	Prenol lipids	Triterpenoids		C33H52O4	-H2O-H	493.369	0.991634	0.627126	0.913989	0.568391
181	181-1	HMDB0014626	Gallamine Triethiodide	Benzenoids	Phenol ethers			C30H60N3O3	-H	509.456	0.996748	0.693224	0.870789	0.601688
182	182-1	HMDB0032494	Propylene glycol mono- and diesters of fats and fatty acids	Lipids and lipid-like molecules	Fatty Acyls	Fatty acid esters		C32H62O4	-H	509.458	0.997004	0.70754	0.848986	0.598892
182	182-2	HMDB0112110	FAHFA(16:0/9-O-16:0)	Lipids and lipid-like molecules	Fatty Acyls	Fatty acids and conjugates		C32H62O4	-H	509.458	0.997004	0.70754	0.848986	0.598892
182	182-3	HMDB0112114	FAHFA(16:0/5-O-16:0)	Lipids and lipid-like molecules	Fatty Acyls	Fatty acids and conjugates		C32H62O4	-H	509.458	0.997004	0.70754	0.848986	0.598892
182	182-4	HMDB0112115	FAHFA(16:0/7-O-16:0)	Lipids and lipid-like molecules	Fatty Acyls	Fatty acids and conjugates		C32H62O4	-H	509.458	0.997004	0.70754	0.848986	0.598892
182	182-5	HMDB0112123	FAHFA(16:0/8-O-16:0)	Lipids and lipid-like molecules	Fatty Acyls	Fatty acids and conjugates		C32H62O4	-H	509.458	0.997004	0.70754	0.848986	0.598892
182	182-6	HMDB0112124	FAHFA(16:0/10-O-16:0)	Lipids and lipid-like molecules	Fatty Acyls	Fatty acids and conjugates		C32H62O4	-H	509.458	0.997004	0.70754	0.848986	0.598892
182	182-7	HMDB0112125	FAHFA(16:0/11-O-16:0)	Lipids and lipid-like molecules	Fatty Acyls	Fatty acids and conjugates		C32H62O4	-H	509.458	0.997004	0.70754	0.848986	0.598892
182	182-8	HMDB0112126	FAHFA(16:0/12-O-16:0)	Lipids and lipid-like molecules	Fatty Acyls	Fatty acids and conjugates		C32H62O4	-H	509.458	0.997004	0.70754	0.848986	0.598892
182	182-9	HMDB0112127	FAHFA(16:0/13-O-16:0)	Lipids and lipid-like molecules	Fatty Acyls	Fatty acids and conjugates		C32H62O4	-H	509.458	0.997004	0.70754	0.848986	0.598892
182	182-10	HMDB0112178	FAHFA(16:0/6-O-16:0)	Lipids and lipid-like molecules	Fatty Acyls	Fatty acids and conjugates		C32H62O4	-H	509.458	0.997004	0.70754	0.848986	0.598892
183	183-1	HMDB0032682	10-Hydroxy-16-hentriacontanone	Lipids and lipid-like molecules	Fatty Acyls	Fatty alcohols		C31H62O2	+HCOO	511.473	0.996655	0.605451	0.957225	0.577615
184	184-1	HMDB0007070	DG(31:1)	Lipids and lipid-like molecules	Glycerolipids	Diradylglycerols		C34H64O5	-H2O-H	533.458	0.996395	0.75277	0.738131	0.55364
185	185-1	HMDB0112108	FAHFA(16:1/9-O-18:0)	Lipids and lipid-like molecules	Fatty Acyls	Fatty acids and conjugates		C34H64O4	-H	535.473	0.997251	0.862836	0.937721	0.806875
185	185-2	HMDB0112117	FAHFA(16:1/12-O-18:0)	Lipids and lipid-like molecules	Fatty Acyls	Fatty acids and conjugates		C34H64O4	-H	535.473	0.997251	0.862836	0.937721	0.806875
185	185-3	HMDB0112122	FAHFA(18:1/9-O-16:0)	Lipids and lipid-like molecules	Fatty Acyls	Fatty acids and conjugates		C34H64O4	-H	535.473	0.997251	0.862836	0.937721	0.806875
185	185-4	HMDB0112134	FAHFA(16:1/5-O-18:0)	Lipids and lipid-like molecules	Fatty Acyls	Fatty acids and conjugates		C34H64O4	-H	535.473	0.997251	0.862836	0.937721	0.806875
185	185-5	HMDB0112135	FAHFA(16:1/7-O-18:0)	Lipids and lipid-like molecules	Fatty Acyls	Fatty acids and conjugates		C34H64O4	-H	535.473	0.997251	0.862836	0.937721	0.806875
185	185-6	HMDB0112136	FAHFA(16:1/8-O-18:0)	Lipids and lipid-like molecules	Fatty Acyls	Fatty acids and conjugates		C34H64O4	-H	535.473	0.997251	0.862836	0.937721	0.806875
185	185-7	HMDB0112137	FAHFA(16:1/10-O-18:0)	Lipids and lipid-like molecules	Fatty Acyls	Fatty acids and conjugates		C34H64O4	-H	535.473	0.997251	0.862836	0.937721	0.806875
185	185-8	HMDB0112138	FAHFA(16:1/11-O-18:0)	Lipids and lipid-like molecules	Fatty Acyls	Fatty acids and conjugates		C34H64O4	-H	535.473	0.997251	0.862836	0.937721	0.806875
185	185-9	HMDB0112139	FAHFA(16:1/13-O-18:0)	Lipids and lipid-like molecules	Fatty Acyls	Fatty acids and conjugates		C34H64O4	-H	535.473	0.997251	0.862836	0.937721	0.806875
185	185-10	HMDB0112162	FAHFA(18:1/5-O-16:0)	Lipids and lipid-like molecules	Fatty Acyls	Fatty acids and conjugates		C34H64O4	-H	535.473	0.997251	0.862836	0.937721	0.806875
185	185-11	HMDB0112163	FAHFA(18:1/7-O-16:0)	Lipids and lipid-like molecules	Fatty Acyls	Fatty acids and conjugates		C34H64O4	-H	535.473	0.997251	0.862836	0.937721	0.806875
185	185-12	HMDB0112164	FAHFA(18:1/8-O-16:0)	Lipids and lipid-like molecules	Fatty Acyls	Fatty acids and conjugates		C34H64O4	-H	535.473	0.997251	0.862836	0.937721	0.806875
185	185-13	HMDB0112165	FAHFA(18:1/10-O-16:0)	Lipids and lipid-like molecules	Fatty Acyls	Fatty acids and conjugates		C34H64O4	-H	535.473	0.997251	0.862836	0.937721	0.806875
185	185-14	HMDB0112166	FAHFA(18:1/11-O-16:0)	Lipids and lipid-like molecules	Fatty Acyls	Fatty acids and conjugates		C34H64O4	-H	535.473	0.997251	0.862836	0.937721	0.806875
185	185-15	HMDB0112167	FAHFA(18:1/12-O-16:0)	Lipids and lipid-like molecules	Fatty Acyls	Fatty acids and conjugates		C34H64O4	-H	535.473	0.997251	0.862836	0.937721	0.806875
185	185-16	HMDB0112168	FAHFA(18:1/13-O-16:0)	Lipids and lipid-like molecules	Fatty Acyls	Fatty acids and conjugates		C34H64O4	-H	535.473	0.997251	0.862836	0.937721	0.806875
185	185-17	HMDB0112172	FAHFA(16:1/6-O-18:0)	Lipids and lipid-like molecules	Fatty Acyls	Fatty acids and conjugates		C34H64O4	-H	535.473	0.997251	0.862836	0.937721	0.806875
185	185-18	HMDB0112175	FAHFA(18:1/6-O-16:0)	Lipids and lipid-like molecules	Fatty Acyls	Fatty acids and conjugates		C34H64O4	-H	535.473	0.997251	0.862836	0.937721	0.806875
186	186-1	HMDB0040821	Nb-Hexacosanoyltryptamine	Organoheterocyclic compounds	Indoles and derivatives	Indoles		C36H62N2O	-H	537.479	0.99654	0.662386	0.936654	0.61828
187	187-1	HMDB0035578	10,12-Tritriacontanedione	Organic oxygen compounds	Organooxygen compounds	Carbonyl compounds		C33H64O2	+HCOO	537.489	0.996752	0.805199	0.972578	0.780575
188	188-1	HMDB0005774	Endomorphin-2	Organic acids and derivatives	Carboxylic acids and derivatives	Amino acids, peptides, and analogues		C32H37N5O5	-H2O-H	552.262	0.998245	0.557197	0.538448	0.299495
189	189-1	HMDB0012986	Kinetensin 4-7	Organic acids and derivatives	Carboxylic acids and derivatives	Amino acids, peptides, and analogues		C26H37N9O6	-H2O-H	552.269	0.997356	0.738444	0.888465	0.654347
190	190-1	HMDB0033599	Vignatic acid A	Organic acids and derivatives	Carboxylic acids and derivatives	Amino acids, peptides, and analogues		C30H39N3O7	-H	552.272	0.997352	0.750585	0.938149	0.702296
191	191-1	HMDB0010387	LysoPC(18:3)	Lipids and lipid-like molecules	Glycerophospholipids	Glycerophosphocholines	C04230	C26H48NO7P	+Cl	552.285	0.997259	0.644664	0.792296	0.509365
192	192-1	HMDB0035310	Ganoderic acid I	Lipids and lipid-like molecules	Prenol lipids	Triterpenoids		C30H44O8	+Na-2H	553.278	0.996287	0.616922	0.87709	0.539087
192	192-2	HMDB0035985	Ganoderic acid G	Lipids and lipid-like molecules	Prenol lipids	Triterpenoids		C30H44O8	+Na-2H	553.278	0.996287	0.616922	0.87709	0.539087
192	192-3	HMDB0036309	Ganoderic acid eta	Lipids and lipid-like molecules	Prenol lipids	Triterpenoids		C30H44O8	+Na-2H	553.278	0.996287	0.616922	0.87709	0.539087
193	193-1	HMDB0061695	LysoPI(16:0)	Lipids and lipid-like molecules	Glycerophospholipids	Glycerophosphoinositols		C25H49O12P	-H2O-H	553.278	0.996346	0.618131	0.860787	0.530136
194	194-1	HMDB0035987	Ganoderic acid H	Lipids and lipid-like molecules	Prenol lipids	Triterpenoids		C32H44O9	-H2O-H	553.281	0.996508	0.570582	0.822259	0.467528
195	195-1	HMDB0006888	5b-Cyprinol sulfate	Lipids and lipid-like molecules	Steroids and steroid derivatives	Bile acids, alcohols and derivatives	C05468	C27H48O8S	+Na-2H	553.282	0.996297	0.613113	0.630575	0.385182
196	196-1	HMDB0007075	DG(33:3)	Lipids and lipid-like molecules	Fatty Acyls	Lineolic acids and derivatives		C36H64O5	-H2O-H	557.458	0.994667	0.657312	0.694546	0.454099
196	196-2	HMDB0056142	DG(32:3)	Lipids and lipid-like molecules	Glycerolipids	Diradylglycerols		C36H64O5	-H2O-H	557.458	0.994667	0.657312	0.694546	0.454099
197	197-1	HMDB0031034	Tetrahydro-6-(2-hydroxy-16,19-dimethylhexacosyl)-4-methyl-2H-pyran-2-one	Lipids and lipid-like molecules	Fatty Acyls	Fatty alcohols		C34H66O3	+Cl	557.47	0.996588	0.599365	0.528175	0.31549
198	198-1	HMDB0112106	FAHFA(16:0/9-O-18:0)	Lipids and lipid-like molecules	Fatty Acyls	Fatty acids and conjugates		C34H66O4	+Na-2H	559.471	0.997078	0.87805	0.935412	0.818938
198	198-2	HMDB0112107	FAHFA(16:0/5-O-18:0)	Lipids and lipid-like molecules	Fatty Acyls	Fatty acids and conjugates		C34H66O4	+Na-2H	559.471	0.997078	0.87805	0.935412	0.818938
198	198-3	HMDB0112111	FAHFA(16:0/10-O-18:0)	Lipids and lipid-like molecules	Fatty Acyls	Fatty acids and conjugates		C34H66O4	+Na-2H	559.471	0.997078	0.87805	0.935412	0.818938
198	198-4	HMDB0112113	FAHFA(16:0/12-O-18:0)	Lipids and lipid-like molecules	Fatty Acyls	Fatty acids and conjugates		C34H66O4	+Na-2H	559.471	0.997078	0.87805	0.935412	0.818938
198	198-5	HMDB0112116	FAHFA(16:0/7-O-18:0)	Lipids and lipid-like molecules	Fatty Acyls	Fatty acids and conjugates		C34H66O4	+Na-2H	559.471	0.997078	0.87805	0.935412	0.818938
198	198-6	HMDB0112118	FAHFA(16:0/8-O-18:0)	Lipids and lipid-like molecules	Fatty Acyls	Fatty acids and conjugates		C34H66O4	+Na-2H	559.471	0.997078	0.87805	0.935412	0.818938
198	198-7	HMDB0112119	FAHFA(16:0/11-O-18:0)	Lipids and lipid-like molecules	Fatty Acyls	Fatty acids and conjugates		C34H66O4	+Na-2H	559.471	0.997078	0.87805	0.935412	0.818938
198	198-8	HMDB0112121	FAHFA(16:0/13-O-18:0)	Lipids and lipid-like molecules	Fatty Acyls	Fatty acids and conjugates		C34H66O4	+Na-2H	559.471	0.997078	0.87805	0.935412	0.818938
198	198-9	HMDB0112146	FAHFA(18:0/5-O-16:0)	Lipids and lipid-like molecules	Fatty Acyls	Fatty acids and conjugates		C34H66O4	+Na-2H	559.471	0.997078	0.87805	0.935412	0.818938
198	198-10	HMDB0112147	FAHFA(18:0/7-O-16:0)	Lipids and lipid-like molecules	Fatty Acyls	Fatty acids and conjugates		C34H66O4	+Na-2H	559.471	0.997078	0.87805	0.935412	0.818938
198	198-11	HMDB0112148	FAHFA(18:0/8-O-16:0)	Lipids and lipid-like molecules	Fatty Acyls	Fatty acids and conjugates		C34H66O4	+Na-2H	559.471	0.997078	0.87805	0.935412	0.818938
198	198-12	HMDB0112149	FAHFA(18:0/9-O-16:0)	Lipids and lipid-like molecules	Fatty Acyls	Fatty acids and conjugates		C34H66O4	+Na-2H	559.471	0.997078	0.87805	0.935412	0.818938
198	198-13	HMDB0112150	FAHFA(18:0/10-O-16:0)	Lipids and lipid-like molecules	Fatty Acyls	Fatty acids and conjugates		C34H66O4	+Na-2H	559.471	0.997078	0.87805	0.935412	0.818938
198	198-14	HMDB0112151	FAHFA(18:0/11-O-16:0)	Lipids and lipid-like molecules	Fatty Acyls	Fatty acids and conjugates		C34H66O4	+Na-2H	559.471	0.997078	0.87805	0.935412	0.818938
198	198-15	HMDB0112152	FAHFA(18:0/12-O-16:0)	Lipids and lipid-like molecules	Fatty Acyls	Fatty acids and conjugates		C34H66O4	+Na-2H	559.471	0.997078	0.87805	0.935412	0.818938
198	198-16	HMDB0112153	FAHFA(18:0/13-O-16:0)	Lipids and lipid-like molecules	Fatty Acyls	Fatty acids and conjugates		C34H66O4	+Na-2H	559.471	0.997078	0.87805	0.935412	0.818938
198	198-17	HMDB0112176	FAHFA(16:0/6-O-18:0)	Lipids and lipid-like molecules	Fatty Acyls	Fatty acids and conjugates		C34H66O4	+Na-2H	559.471	0.997078	0.87805	0.935412	0.818938
198	198-18	HMDB0112179	FAHFA(18:0/6-O-16:0)	Lipids and lipid-like molecules	Fatty Acyls	Fatty acids and conjugates		C34H66O4	+Na-2H	559.471	0.997078	0.87805	0.935412	0.818938
199	199-1	HMDB0007074	DG(33:2)	Lipids and lipid-like molecules	Fatty Acyls	Lineolic acids and derivatives		C36H66O5	-H2O-H	559.473	0.996853	0.886962	0.851861	0.75319
199	199-2	HMDB0055967	DG(32:2)	Lipids and lipid-like molecules	Glycerolipids	Diradylglycerols		C36H66O5	-H2O-H	559.473	0.996853	0.886962	0.851861	0.75319
200	200-1	HMDB0041032	25-Methyl-21-tritriacontene-1,9,11-triol	Lipids and lipid-like molecules	Fatty Acyls	Fatty alcohols		C34H68O3	+Cl	559.485	0.996687	0.757017	0.53996	0.407405
201	201-1	HMDB0035517	1,1'-(1,4-Dihydro-4-nonyl-3,5-pyridinediyl)bis[1-decanone]	Organoheterocyclic compounds	Pyridines and derivatives	Hydropyridines		C34H61NO2	+HCOO	560.469	0.995489	0.646715	0.903092	0.581409
202	202-1	HMDB0007072	DG(33:1)	Lipids and lipid-like molecules	Glycerolipids	Diradylglycerols		C36H68O5	-H2O-H	561.489	0.997196	0.914152	0.943741	0.860303
203	203-1	HMDB0007071	DG(33:0)	Lipids and lipid-like molecules	Glycerolipids	Diradylglycerols		C36H70O5	-H2O-H	563.505	0.997175	0.817395	0.974545	0.794338
204	204-1	HMDB0004949	Cer(d34:1)	Lipids and lipid-like molecules	Sphingolipids	Ceramides	C00195	C34H67NO3	+Cl	572.48	0.99436	0.587817	0.863808	0.504897
205	205-1	HMDB0007085	DG(35:5)	Lipids and lipid-like molecules	Glycerolipids	Diradylglycerols		C38H64O5	-H2O-H	581.458	0.993258	0.566343	0.810322	0.455826
206	206-1	HMDB0071228	TG(32:0)	Lipids and lipid-like molecules	Glycerolipids	Triradylcglycerols		C35H66O6	-H	581.479	0.996715	0.751113	0.642786	0.481219
207	207-1	HMDB0007083	DG(35:4)	Lipids and lipid-like molecules	Glycerolipids	Diradylglycerols		C38H66O5	-H2O-H	583.473	0.995008	0.699973	0.907451	0.632021
208	208-1	HMDB0006347	Hexacosanoyl carnitine	Lipids and lipid-like molecules	Fatty Acyls	Fatty acid esters		C33H65NO4	+HCOO	584.49	0.99387	0.624238	0.646508	0.401101
209	209-1	HMDB0004948	Cer(d36:2)	Lipids and lipid-like molecules	Sphingolipids	Ceramides	C00195	C36H69NO3	+Na-2H	584.502	0.996384	0.581944	0.590323	0.342292
209	209-2	HMDB0240362	N-stearoyl-sphingadienine					C36H69NO3	+Na-2H	584.502	0.996384	0.581944	0.590323	0.342292
210	210-1	HMDB0038713	Erythrinasinate A	Phenylpropanoids and polyketides	Cinnamic acids and derivatives	Hydroxycinnamic acids and derivatives		C38H66O4	-H	585.489	0.996383	0.632391	0.933984	0.588507
211	211-1	HMDB0007092	DG(37:6)	Lipids and lipid-like molecules	Glycerolipids	Diradylglycerols		C40H66O5	-H2O-H	607.473	0.992691	0.601062	0.887513	0.529551
211	211-2	HMDB0056291	DG(36:6)	Lipids and lipid-like molecules	Glycerolipids	Diradylglycerols		C40H66O5	-H2O-H	607.473	0.992691	0.601062	0.887513	0.529551
212	212-1	HMDB0035900	Muricatenol	Lipids and lipid-like molecules	Fatty Acyls	Fatty alcohols		C37H68O6	-H	607.494	0.997186	0.856708	0.590986	0.504878
213	213-1	HMDB0007090	DG(37:5)	Lipids and lipid-like molecules	Glycerolipids	Diradylglycerols		C40H68O5	-H2O-H	609.489	0.995115	0.624184	0.956233	0.593949
214	214-1	HMDB0033753	Glycerol 1,3-didodecanoate 2-decanoate	Lipids and lipid-like molecules	Glycerolipids	Triradylcglycerols		C37H70O6	-H	609.51	0.997031	0.929537	0.93056	0.862422
214	214-2	HMDB0038058	Glycerol 1-dodecanoate 2-tetradecanoate 3-octanoate	Lipids and lipid-like molecules	Glycerolipids	Triradylcglycerols		C37H70O6	-H	609.51	0.997031	0.929537	0.93056	0.862422
214	214-3	HMDB0071115	TG(34:0)	Lipids and lipid-like molecules	Glycerolipids	Triradylcglycerols		C37H70O6	-H	609.51	0.997031	0.929537	0.93056	0.862422
215	215-1	HMDB0040132	N-(2R-Hydroxyhexadecanoyl)-2S-amino-9-methyl-4E,8E-octadecadiene-1,3R-diol	Lipids and lipid-like molecules	Sphingolipids	Ceramides		C35H67NO4	+HCOO	610.505	0.997738	0.697569	0.936918	0.652087
216	216-1	HMDB0037420	Maysin 3'-methyl ether	Phenylpropanoids and polyketides	Flavonoids	Flavonoid glycosides		C28H30O14	+Na-2H	611.138	0.996862	0.638502	0.937945	0.597
217	217-1	HMDB0039314	4-(4-Hydroxyphenyl)-2-butanone O-[2,6-digalloylglucoside]	Organic oxygen compounds	Organooxygen compounds	Carbohydrates and carbohydrate conjugates		C30H30O15	-H2O-H	611.141	0.997388	0.650192	0.920367	0.596853
218	218-1	HMDB0003337	Oxidized glutathione	Organic acids and derivatives	Carboxylic acids and derivatives	Amino acids, peptides, and analogues	C00127	C20H32N6O12S2	-H	611.145	0.997194	0.617709	0.941709	0.58007
219	219-1	HMDB0112112	FAHFA(18:0/9-O-18:0)	Lipids and lipid-like molecules	Fatty Acyls	Fatty acids and conjugates		C36H70O4	+HCOO	611.526	0.997138	0.819195	0.908179	0.741846
219	219-2	HMDB0112120	FAHFA(18:0/12-O-18:0)	Lipids and lipid-like molecules	Fatty Acyls	Fatty acids and conjugates		C36H70O4	+HCOO	611.526	0.997138	0.819195	0.908179	0.741846
219	219-3	HMDB0112128	FAHFA(18:0/5-O-18:0)	Lipids and lipid-like molecules	Fatty Acyls	Fatty acids and conjugates		C36H70O4	+HCOO	611.526	0.997138	0.819195	0.908179	0.741846
219	219-4	HMDB0112129	FAHFA(18:0/7-O-18:0)	Lipids and lipid-like molecules	Fatty Acyls	Fatty acids and conjugates		C36H70O4	+HCOO	611.526	0.997138	0.819195	0.908179	0.741846
219	219-5	HMDB0112130	FAHFA(18:0/8-O-18:0)	Lipids and lipid-like molecules	Fatty Acyls	Fatty acids and conjugates		C36H70O4	+HCOO	611.526	0.997138	0.819195	0.908179	0.741846
219	219-6	HMDB0112131	FAHFA(18:0/10-O-18:0)	Lipids and lipid-like molecules	Fatty Acyls	Fatty acids and conjugates		C36H70O4	+HCOO	611.526	0.997138	0.819195	0.908179	0.741846
219	219-7	HMDB0112132	FAHFA(18:0/11-O-18:0)	Lipids and lipid-like molecules	Fatty Acyls	Fatty acids and conjugates		C36H70O4	+HCOO	611.526	0.997138	0.819195	0.908179	0.741846
219	219-8	HMDB0112133	FAHFA(18:0/13-O-18:0)	Lipids and lipid-like molecules	Fatty Acyls	Fatty acids and conjugates		C36H70O4	+HCOO	611.526	0.997138	0.819195	0.908179	0.741846
219	219-9	HMDB0112177	FAHFA(18:0/6-O-18:0)	Lipids and lipid-like molecules	Fatty Acyls	Fatty acids and conjugates		C36H70O4	+HCOO	611.526	0.997138	0.819195	0.908179	0.741846
220	220-1	HMDB0112212	CE(3D5)	Lipids and lipid-like molecules	Steroids and steroid derivatives	Steroid esters		C41H66O3	+Na-2H	627.476	0.996202	0.529542	0.901263	0.475444
221	221-1	HMDB0012096	SM(d30:1)	Lipids and lipid-like molecules	Sphingolipids	Phosphosphingolipids	C00550	C35H71N2O6P	-H2O-H	627.487	0.995614	0.581346	0.636959	0.36867
222	222-1	HMDB0034510	Erythrodiol 3-decanoate	Lipids and lipid-like molecules	Prenol lipids	Triterpenoids		C40H68O3	+Cl	631.485	0.99564	0.587781	0.872722	0.510733
223	223-1	HMDB0056286	DG(38:6)	Lipids and lipid-like molecules	Fatty Acyls	Eicosanoids		C42H70O5	-H2O-H	635.505	0.995621	0.584373	0.943925	0.549189
224	224-1	HMDB0032475	Polyoxyethylene dioleate	Lipids and lipid-like molecules	Fatty Acyls	Fatty acid esters		C38H70O4	+HCOO	635.526	0.997323	0.953414	0.911973	0.867161
225	225-1	HMDB0056237	DG(38:5)	Lipids and lipid-like molecules	Fatty Acyls	Eicosanoids		C42H72O5	-H2O-H	637.52	0.995464	0.532476	0.9807	0.51983
226	226-1	HMDB0034872	Cheritamine	Organoheterocyclic compounds	Indoles and derivatives	Indoles		C40H68N2O	+HCOO	637.531	0.99724	0.847733	0.973689	0.82315
227	227-1	HMDB0039077	Lactariamide B	Lipids and lipid-like molecules	Sphingolipids	Ceramides		C37H71NO4	+HCOO	638.537	0.997111	0.732336	0.921056	0.672573
228	228-1	HMDB0032260	Ethylene glycol distearate	Lipids and lipid-like molecules	Fatty Acyls	Fatty acid esters		C38H74O4	+HCOO	639.557	0.996831	0.626364	0.937167	0.585148
229	229-1	HMDB0112215	CE(5M5)	Lipids and lipid-like molecules	Steroids and steroid derivatives	Steroid esters		C42H68O3	+Cl	655.485	0.993928	0.533692	0.873672	0.46344
229	229-2	HMDB0112223	CE(7M3)	Lipids and lipid-like molecules	Steroids and steroid derivatives	Steroid esters		C42H68O3	+Cl	655.485	0.993928	0.533692	0.873672	0.46344
230	230-1	HMDB0008851	PE(14:0/P-18:0)	Lipids and lipid-like molecules	Glycerophospholipids	Glycerophosphoethanolamines		C37H74NO7P	-H2O-H	656.503	0.992407	0.809733	0.558773	0.449022
230	230-2	HMDB0008949	PE(16:0/P-16:0)	Lipids and lipid-like molecules	Glycerophospholipids	Glycerophosphoethanolamines		C37H74NO7P	-H2O-H	656.503	0.992407	0.809733	0.558773	0.449022
230	230-3	HMDB0011368	PE(P-18:0/14:0)	Lipids and lipid-like molecules	Glycerophospholipids	Glycerophosphoethanolamines		C37H74NO7P	-H2O-H	656.503	0.992407	0.809733	0.558773	0.449022
231	231-1	HMDB0007029	DG(36:1)	Lipids and lipid-like molecules	Glycerolipids	Diradylglycerols		C39H74O5	+Cl	657.522	0.995974	0.916482	0.659674	0.602146
232	232-1	HMDB0011188	TG(36:0)	Lipids and lipid-like molecules	Glycerolipids	Triradylcglycerols		C39H74O6	+Na-2H	659.523	0.995826	0.894716	0.970997	0.865139
233	233-1	HMDB0007028	DG(36:0)	Lipids and lipid-like molecules	Glycerolipids	Diradylglycerols		C39H76O5	+Cl	659.538	0.996445	0.86361	0.797179	0.686004
233	233-2	HMDB0031012	Glycerol 1,2-dioctadecanoate	Lipids and lipid-like molecules	Glycerolipids	Diradylglycerols		C39H76O5	+Cl	659.538	0.996445	0.86361	0.797179	0.686004
234	234-1	HMDB0030129	Plastoquinone 8	Lipids and lipid-like molecules	Prenol lipids	Quinone and hydroquinone lipids	C02061	C48H72O2	-H2O-H	661.535	0.995566	0.761219	0.902404	0.683881
235	235-1	HMDB0007146	DG(38:3)	Lipids and lipid-like molecules	Glycerolipids	Diradylglycerols		C41H74O5	+Cl	681.522	0.995691	0.884932	0.584822	0.515298
236	236-1	HMDB0007065	DG(38:2)	Lipids and lipid-like molecules	Glycerolipids	Diradylglycerols		C41H76O5	+Cl	683.538	0.995985	0.844737	0.707078	0.594897
237	237-1	HMDB0061670	CE(DiMe(9,3))	Lipids and lipid-like molecules	Steroids and steroid derivatives	Steroid esters		C45H74O3	+Na-2H	683.538	0.996319	0.818509	0.54466	0.444168
238	238-1	HMDB0007961	PC(15:0/P-16:0)	Lipids and lipid-like molecules	Glycerophospholipids	Glycerophosphocholines	C00157	C39H78NO7P	-H2O-H	684.534	0.994622	0.868799	0.736612	0.636526
238	238-2	HMDB0008950	PE(16:0/P-18:0)	Lipids and lipid-like molecules	Glycerophospholipids	Glycerophosphoethanolamines		C39H78NO7P	-H2O-H	684.534	0.994622	0.868799	0.736612	0.636526
238	238-3	HMDB0009015	PE(18:0/P-16:0)	Lipids and lipid-like molecules	Glycerophospholipids	Glycerophosphoethanolamines		C39H78NO7P	-H2O-H	684.534	0.994622	0.868799	0.736612	0.636526
238	238-4	HMDB0011157	PE(O-16:0/18:1)	Lipids and lipid-like molecules	Glycerophospholipids	Glycerophosphoethanolamines		C39H78NO7P	-H2O-H	684.534	0.994622	0.868799	0.736612	0.636526
238	238-5	HMDB0011205	PC(P-16:0/15:0)	Lipids and lipid-like molecules	Glycerophospholipids	Glycerophosphocholines		C39H78NO7P	-H2O-H	684.534	0.994622	0.868799	0.736612	0.636526
238	238-6	HMDB0011340	PE(P-16:0/18:0)	Lipids and lipid-like molecules	Glycerophospholipids	Glycerophosphoethanolamines		C39H78NO7P	-H2O-H	684.534	0.994622	0.868799	0.736612	0.636526
238	238-7	HMDB0011371	PE(P-18:0/16:0)	Lipids and lipid-like molecules	Glycerophospholipids	Glycerophosphoethanolamines		C39H78NO7P	-H2O-H	684.534	0.994622	0.868799	0.736612	0.636526
239	239-1	HMDB0007036	DG(38:1)	Lipids and lipid-like molecules	Glycerolipids	Diradylglycerols		C41H78O5	+Cl	685.553	0.995815	0.747639	0.890884	0.663272
240	240-1	HMDB0007177	DG(40:5)	Lipids and lipid-like molecules	Glycerolipids	Diradylglycerols		C43H74O5	+Cl	705.522	0.991104	0.629505	0.670463	0.418305
241	241-1	HMDB0011145	PA(O-16:0/18:0)	Lipids and lipid-like molecules	Glycerophospholipids	Glycerophosphates		C37H75O7P	+HCOO	707.523	0.991389	0.624127	0.938571	0.580743
242	242-1	HMDB0007176	DG(40:4)	Lipids and lipid-like molecules	Glycerolipids	Diradylglycerols		C43H76O5	+Cl	707.538	0.993269	0.54643	0.770818	0.418363
242	242-2	HMDB0007197	DG(38:4)	Lipids and lipid-like molecules	Glycerolipids	Diradylglycerols		C43H76O5	+Cl	707.538	0.993269	0.54643	0.770818	0.418363
243	243-1	HMDB0114849	PA(38:6)	Lipids and lipid-like molecules	Glycerophospholipids	Glycerophosphates		C41H69O8P	-H	719.466	0.996336	0.575426	0.961425	0.551202
244	244-1	HMDB0039242	Lupeoside	Lipids and lipid-like molecules	Prenol lipids	Terpene glycosides		C41H68O10	-H	719.474	0.99737	0.78268	0.944433	0.737245
245	245-1	HMDB0010571	PG(32:1)	Lipids and lipid-like molecules	Glycerophospholipids	Glycerophosphoglycerols		C38H73O10P	-H	719.487	0.997099	0.931902	0.699148	0.649647
246	246-1	HMDB0112281	PS(31:0)	Lipids and lipid-like molecules	Glycerophospholipids	Glycerophosphoserines		C37H72NO10P	-H	720.482	0.996363	0.790744	0.836743	0.659242
247	247-1	HMDB0038620	Acidissiminin epoxide	Benzenoids	Benzene and substituted derivatives	Benzoic acids and derivatives		C43H65NO5	+HCOO	720.485	0.996675	0.779571	0.828993	0.64411
248	248-1	HMDB0008984	PE(16:1/P-18:1)	Lipids and lipid-like molecules	Glycerophospholipids	Glycerophosphoethanolamines	C00350	C39H74NO7P	+Na-2H	720.495	0.9965	0.900121	0.615083	0.551711
248	248-2	HMDB0009114	PE(18:2/P-16:0)	Lipids and lipid-like molecules	Glycerophospholipids	Glycerophosphoethanolamines		C39H74NO7P	+Na-2H	720.495	0.9965	0.900121	0.615083	0.551711
248	248-3	HMDB0011343	PE(P-16:0/18:2)	Lipids and lipid-like molecules	Glycerophospholipids	Glycerophosphoethanolamines		C39H74NO7P	+Na-2H	720.495	0.9965	0.900121	0.615083	0.551711
248	248-4	HMDB0011405	PE(P-18:1/16:1)	Lipids and lipid-like molecules	Glycerophospholipids	Glycerophosphoethanolamines		C39H74NO7P	+Na-2H	720.495	0.9965	0.900121	0.615083	0.551711
249	249-1	HMDB0009215	PE(18:4/P-18:1)	Lipids and lipid-like molecules	Glycerophospholipids	Glycerophosphoethanolamines		C41H72NO7P	-H	720.497	0.996658	0.86586	0.595457	0.51386
249	249-2	HMDB0009477	PE(20:5/P-16:0)	Lipids and lipid-like molecules	Glycerophospholipids	Glycerophosphoethanolamines		C41H72NO7P	-H	720.497	0.996658	0.86586	0.595457	0.51386
249	249-3	HMDB0011354	PE(P-16:0/20:5)	Lipids and lipid-like molecules	Glycerophospholipids	Glycerophosphoethanolamines		C41H72NO7P	-H	720.497	0.996658	0.86586	0.595457	0.51386
249	249-4	HMDB0011412	PE(P-18:1/18:4)	Lipids and lipid-like molecules	Glycerophospholipids	Glycerophosphoethanolamines		C41H72NO7P	-H	720.497	0.996658	0.86586	0.595457	0.51386
250	250-1	HMDB0031983	Lucyobroside	Lipids and lipid-like molecules	Sphingolipids	Glycosphingolipids		C39H73NO9	+Na-2H	720.503	0.9964	0.850335	0.541723	0.458988
250	250-2	HMDB0032795	AS 1-2	Lipids and lipid-like molecules	Sphingolipids	Glycosphingolipids		C39H73NO9	+Na-2H	720.503	0.9964	0.850335	0.541723	0.458988
251	251-1	HMDB0116369	DG(11D14D14)	Lipids and lipid-like molecules	Fatty Acyls	Fatty acids and conjugates		C43H72O7	+Na-2H	721.503	0.997786	0.881072	0.972206	0.854687
251	251-2	HMDB0116376	DG(11D12D12)	Lipids and lipid-like molecules	Fatty Acyls	Fatty acids and conjugates		C43H72O7	+Na-2H	721.503	0.997786	0.881072	0.972206	0.854687
251	251-3	HMDB0116390	DG(11M14M14)	Lipids and lipid-like molecules	Fatty Acyls	Fatty acids and conjugates		C43H72O7	+Na-2H	721.503	0.997786	0.881072	0.972206	0.854687
251	251-4	HMDB0116423	DG(9D14D14)	Lipids and lipid-like molecules	Fatty Acyls	Fatty acids and conjugates		C43H72O7	+Na-2H	721.503	0.997786	0.881072	0.972206	0.854687
251	251-5	HMDB0116443	DG(9M16M16)	Lipids and lipid-like molecules	Fatty Acyls	Fatty acids and conjugates		C43H72O7	+Na-2H	721.503	0.997786	0.881072	0.972206	0.854687
252	252-1	HMDB0010570	PG(32:0)	Lipids and lipid-like molecules	Glycerophospholipids	Glycerophosphoglycerols		C38H75O10P	-H	721.503	0.997882	0.882024	0.953108	0.838884
253	253-1	HMDB0240677	SM(d17:2(4E,8Z)17:2)	Organic nitrogen compounds	Organonitrogen compounds	Quaternary ammonium salts		C38H75N2O6P	+Cl	721.505	0.997868	0.797588	0.870815	0.693071
254	254-1	HMDB0007866	PC(28:0)	Lipids and lipid-like molecules	Glycerophospholipids	Glycerophosphocholines		C36H72NO8P	+HCOO	722.498	0.997885	0.704198	0.941897	0.661879
254	254-2	HMDB0008890	PE(31:0)	Lipids and lipid-like molecules	Glycerophospholipids	Glycerophosphoethanolamines		C36H72NO8P	+HCOO	722.498	0.997885	0.704198	0.941897	0.661879
255	255-1	HMDB0008951	PE(16:0/P-18:1)	Lipids and lipid-like molecules	Glycerophospholipids	Glycerophosphoethanolamines		C39H76NO7P	+Na-2H	722.511	0.997557	0.79597	0.950979	0.755101
255	255-2	HMDB0008983	PE(16:1/P-18:0)	Lipids and lipid-like molecules	Glycerophospholipids	Glycerophosphoethanolamines	C00350	C39H76NO7P	+Na-2H	722.511	0.997557	0.79597	0.950979	0.755101
255	255-3	HMDB0009048	PE(18:1/P-16:0)	Lipids and lipid-like molecules	Glycerophospholipids	Glycerophosphoethanolamines		C39H76NO7P	+Na-2H	722.511	0.997557	0.79597	0.950979	0.755101
255	255-4	HMDB0011341	PEP-16:0/18:1)	Lipids and lipid-like molecules	Glycerophospholipids	Glycerophosphoethanolamines		C39H76NO7P	+Na-2H	722.511	0.997557	0.79597	0.950979	0.755101
255	255-5	HMDB0011342	PE(P-16:0/18:1)	Lipids and lipid-like molecules	Glycerophospholipids	Glycerophosphoethanolamines		C39H76NO7P	+Na-2H	722.511	0.997557	0.79597	0.950979	0.755101
255	255-6	HMDB0011372	PE(P-18:0/16:1)	Lipids and lipid-like molecules	Glycerophospholipids	Glycerophosphoethanolamines		C39H76NO7P	+Na-2H	722.511	0.997557	0.79597	0.950979	0.755101
255	255-7	HMDB0011404	PE(P-18:1/16:0)	Lipids and lipid-like molecules	Glycerophospholipids	Glycerophosphoethanolamines		C39H76NO7P	+Na-2H	722.511	0.997557	0.79597	0.950979	0.755101
256	256-1	HMDB0009149	PE(18:3/P-18:1)	Lipids and lipid-like molecules	Glycerophospholipids	Glycerophosphoethanolamines		C41H74NO7P	-H	722.513	0.997455	0.792874	0.931893	0.736993
256	256-2	HMDB0009214	PE(18:4/P-18:0)	Lipids and lipid-like molecules	Glycerophospholipids	Glycerophosphoethanolamines		C41H74NO7P	-H	722.513	0.997455	0.792874	0.931893	0.736993
256	256-3	HMDB0009411	PE(20:4/P-16:0)	Lipids and lipid-like molecules	Glycerophospholipids	Glycerophosphoethanolamines		C41H74NO7P	-H	722.513	0.997455	0.792874	0.931893	0.736993
256	256-4	HMDB0011352	PE(P-16:0/20:4)	Lipids and lipid-like molecules	Glycerophospholipids	Glycerophosphoethanolamines		C41H74NO7P	-H	722.513	0.997455	0.792874	0.931893	0.736993
256	256-5	HMDB0011379	PE(P-18:0/18:4)	Lipids and lipid-like molecules	Glycerophospholipids	Glycerophosphoethanolamines		C41H74NO7P	-H	722.513	0.997455	0.792874	0.931893	0.736993
256	256-6	HMDB0011410	PE(P-18:1/18:3)	Lipids and lipid-like molecules	Glycerophospholipids	Glycerophosphoethanolamines		C41H74NO7P	-H	722.513	0.997455	0.792874	0.931893	0.736993
257	257-1	HMDB0010169	SM(d34:1)	Lipids and lipid-like molecules	Sphingolipids	Phosphosphingolipids		C39H79N2O6P	+Cl	737.536	0.993796	0.640994	0.866446	0.551941
258	258-1	HMDB0007440	DG(42:8)	Lipids and lipid-like molecules	Glycerolipids	Diradylglycerols		C45H72O5	+HCOO	737.536	0.993403	0.68648	0.907778	0.619061
259	259-1	HMDB0114872	PA(40:2)	Lipids and lipid-like molecules	Glycerophospholipids	Glycerophosphates		C43H81O8P	-H2O-H	737.549	0.994019	0.606268	0.909158	0.547897
260	260-1	HMDB0012358	PS(34:2)	Lipids and lipid-like molecules	Glycerophospholipids	Glycerophosphoserines		C40H74NO10P	-H2O-H	740.487	0.992416	0.602087	0.575912	0.344119
261	261-1	HMDB0007869	PC(30:0)	Lipids and lipid-like molecules	Glycerophospholipids	Glycerophosphocholines		C38H76NO8P	+Cl	740.499	0.992828	0.573264	0.841649	0.479026
261	261-2	HMDB0008892	PE(33:0)	Lipids and lipid-like molecules	Glycerophospholipids	Glycerophosphoethanolamines		C38H76NO8P	+Cl	740.499	0.992828	0.573264	0.841649	0.479026
261	261-3	HMDB0010567	PE-NMe(32:0)	Lipids and lipid-like molecules	Glycerophospholipids	Glycerophosphoethanolamines		C38H76NO8P	+Cl	740.499	0.992828	0.573264	0.841649	0.479026
262	262-1	HMDB0112323	PS(33:2)	Lipids and lipid-like molecules	Glycerophospholipids	Glycerophosphoserines		C39H72NO10P	-H	744.482	0.993463	0.725002	0.567731	0.408916
263	263-1	HMDB0114918	PA(40:7)	Lipids and lipid-like molecules	Glycerophospholipids	Glycerophosphates		C43H71O8P	-H	745.482	0.997708	0.767224	0.947662	0.725403
264	264-1	HMDB0030448	Narasin	Lipids and lipid-like molecules	Prenol lipids	Terpene glycosides		C43H72O11	-H2O-H	745.49	0.997653	0.915126	0.967883	0.883656
265	265-1	HMDB0010575	PG(34:2)	Lipids and lipid-like molecules	Glycerophospholipids	Glycerophosphoglycerols		C40H75O10P	-H	745.503	0.997618	0.949621	0.870834	0.824992
266	266-1	HMDB0112283	PS(33:1)	Lipids and lipid-like molecules	Glycerophospholipids	Glycerophosphoserines		C39H74NO10P	-H	746.498	0.997476	0.933537	0.96164	0.895461
267	267-1	HMDB0009148	PE(18:3/P-18:0)	Lipids and lipid-like molecules	Glycerophospholipids	Glycerophosphoethanolamines	C00350	C41H76NO7P	+Na-2H	746.511	0.997327	0.9717	0.780063	0.755962
267	267-2	HMDB0009345	PE(20:3/P-16:0)	Lipids and lipid-like molecules	Glycerophospholipids	Glycerophosphoethanolamines		C41H76NO7P	+Na-2H	746.511	0.997327	0.9717	0.780063	0.755962
267	267-3	HMDB0011350	PE(P-16:0/20:3)	Lipids and lipid-like molecules	Glycerophospholipids	Glycerophosphoethanolamines		C41H76NO7P	+Na-2H	746.511	0.997327	0.9717	0.780063	0.755962
267	267-4	HMDB0011377	PE(P-18:0/18:3)	Lipids and lipid-like molecules	Glycerophospholipids	Glycerophosphoethanolamines		C41H76NO7P	+Na-2H	746.511	0.997327	0.9717	0.780063	0.755962
268	268-1	HMDB0005780	PE(P-16:0/22:6)	Lipids and lipid-like molecules	Glycerophospholipids	Glycerophosphoethanolamines	C00350	C43H74NO7P	-H	746.513	0.997232	0.964215	0.719868	0.692187
268	268-2	HMDB0009479	PE(20:5/P-18:1)	Lipids and lipid-like molecules	Glycerophospholipids	Glycerophosphoethanolamines		C43H74NO7P	-H	746.513	0.997232	0.964215	0.719868	0.692187
268	268-3	HMDB0009708	PE(22:6/P-16:0)	Lipids and lipid-like molecules	Glycerophospholipids	Glycerophosphoethanolamines		C43H74NO7P	-H	746.513	0.997232	0.964215	0.719868	0.692187
268	268-4	HMDB0011420	PE(P-18:1/20:5)	Lipids and lipid-like molecules	Glycerophospholipids	Glycerophosphoethanolamines		C43H74NO7P	-H	746.513	0.997232	0.964215	0.719868	0.692187
269	269-1	HMDB0014352	Azithromycin	Organic oxygen compounds	Organooxygen compounds	Carbohydrates and carbohydrate conjugates	C06838	C38H72N2O12	-H	747.501	0.997634	0.910654	0.963491	0.875331
270	270-1	HMDB0031133	1-O-beta-D-Glucopyranosyl-2,3-di-O-(8-hexadecenoyl)glycerol	Lipids and lipid-like molecules	Glycerolipids	Glycosylglycerols		C41H74O10	+Na-2H	747.503	0.997638	0.891171	0.96283	0.856021
271	271-1	HMDB0010573	PG(34:1)	Lipids and lipid-like molecules	Glycerophospholipids	Glycerophosphoglycerols		C40H77O10P	-H	747.518	0.997751	0.962759	0.980169	0.941544
272	272-1	HMDB0112322	PS(33:0)	Lipids and lipid-like molecules	Glycerophospholipids	Glycerophosphoserines		C39H76NO10P	-H	748.514	0.997625	0.778342	0.917605	0.712514
273	273-1	HMDB0009050	PE(18:1/P-18:1)	Lipids and lipid-like molecules	Glycerophospholipids	Glycerophosphoethanolamines		C41H78NO7P	+Na-2H	748.526	0.99745	0.892408	0.959298	0.853902
273	273-2	HMDB0009115	PE(18:2/P-18:0)	Lipids and lipid-like molecules	Glycerophospholipids	Glycerophosphoethanolamines		C41H78NO7P	+Na-2H	748.526	0.99745	0.892408	0.959298	0.853902
273	273-3	HMDB0009312	PE(20:2/P-16:0)	Lipids and lipid-like molecules	Glycerophospholipids	Glycerophosphoethanolamines		C41H78NO7P	+Na-2H	748.526	0.99745	0.892408	0.959298	0.853902
273	273-4	HMDB0011349	PE(P-16:0/20:2)	Lipids and lipid-like molecules	Glycerophospholipids	Glycerophosphoethanolamines		C41H78NO7P	+Na-2H	748.526	0.99745	0.892408	0.959298	0.853902
273	273-5	HMDB0011376	PE(P-18:0/18:2)	Lipids and lipid-like molecules	Glycerophospholipids	Glycerophosphoethanolamines		C41H78NO7P	+Na-2H	748.526	0.99745	0.892408	0.959298	0.853902
273	273-6	HMDB0011407	PE(P-18:1/18:1)	Lipids and lipid-like molecules	Glycerophospholipids	Glycerophosphoethanolamines		C41H78NO7P	+Na-2H	748.526	0.99745	0.892408	0.959298	0.853902
274	274-1	HMDB0009413	PE(20:4/P-18:1)	Lipids and lipid-like molecules	Glycerophospholipids	Glycerophosphoethanolamines		C43H76NO7P	-H	748.529	0.997373	0.885943	0.958688	0.847112
274	274-2	HMDB0009478	PE(20:5/P-18:0)	Lipids and lipid-like molecules	Glycerophospholipids	Glycerophosphoethanolamines		C43H76NO7P	-H	748.529	0.997373	0.885943	0.958688	0.847112
274	274-3	HMDB0009642	PE(22:5/P-16:0)	Lipids and lipid-like molecules	Glycerophospholipids	Glycerophosphoethanolamines		C43H76NO7P	-H	748.529	0.997373	0.885943	0.958688	0.847112
274	274-4	HMDB0011359	PE(P-16:0/22:5)	Lipids and lipid-like molecules	Glycerophospholipids	Glycerophosphoethanolamines		C43H76NO7P	-H	748.529	0.997373	0.885943	0.958688	0.847112
274	274-5	HMDB0011387	PE(P-18:0/20:5)	Lipids and lipid-like molecules	Glycerophospholipids	Glycerophosphoethanolamines		C43H76NO7P	-H	748.529	0.997373	0.885943	0.958688	0.847112
274	274-6	HMDB0011418	PE(P-18:1/20:4)	Lipids and lipid-like molecules	Glycerophospholipids	Glycerophosphoethanolamines		C43H76NO7P	-H	748.529	0.997373	0.885943	0.958688	0.847112
275	275-1	HMDB0035990	Cerebroside B	Lipids and lipid-like molecules	Sphingolipids	Glycosphingolipids		C41H77NO9	+Na-2H	748.535	0.997288	0.901211	0.911036	0.818809
276	276-1	HMDB0116378	DG(11D16D16)	Lipids and lipid-like molecules	Fatty Acyls	Fatty acids and conjugates		C45H76O7	+Na-2H	749.534	0.997007	0.743259	0.98424	0.729355
276	276-2	HMDB0116392	DG(11M16M16)	Lipids and lipid-like molecules	Fatty Acyls	Fatty acids and conjugates		C45H76O7	+Na-2H	749.534	0.997007	0.743259	0.98424	0.729355
276	276-3	HMDB0116411	DG(13D14D14)	Lipids and lipid-like molecules	Fatty Acyls	Fatty acids and conjugates		C45H76O7	+Na-2H	749.534	0.997007	0.743259	0.98424	0.729355
276	276-4	HMDB0116416	DG(13M16M16)	Lipids and lipid-like molecules	Fatty Acyls	Fatty acids and conjugates		C45H76O7	+Na-2H	749.534	0.997007	0.743259	0.98424	0.729355
276	276-5	HMDB0116421	DG(13M14M14)	Lipids and lipid-like molecules	Fatty Acyls	Fatty acids and conjugates		C45H76O7	+Na-2H	749.534	0.997007	0.743259	0.98424	0.729355
276	276-6	HMDB0116426	DG(9D16D16)	Lipids and lipid-like molecules	Fatty Acyls	Fatty acids and conjugates		C45H76O7	+Na-2H	749.534	0.997007	0.743259	0.98424	0.729355
276	276-7	HMDB0116445	DG(9M18M18)	Lipids and lipid-like molecules	Fatty Acyls	Fatty acids and conjugates		C45H76O7	+Na-2H	749.534	0.997007	0.743259	0.98424	0.729355
277	277-1	HMDB0010572	PG(34:0)	Lipids and lipid-like molecules	Glycerophospholipids	Glycerophosphoglycerols		C40H79O10P	-H	749.534	0.99706	0.742553	0.972133	0.719738
278	278-1	HMDB0001060	Ubiquinol 8	Lipids and lipid-like molecules	Prenol lipids	Quinone and hydroquinone lipids		C49H76O4	+Na-2H	749.549	0.995329	0.535297	0.658261	0.350719
279	279-1	HMDB0007963	PC(15:0/P-18:1)	Lipids and lipid-like molecules	Glycerophospholipids	Glycerophosphocholines		C41H80NO7P	+Na-2H	750.542	0.996645	0.568217	0.936283	0.530227
279	279-2	HMDB0009017	PE(18:0/P-18:1)	Lipids and lipid-like molecules	Glycerophospholipids	Glycerophosphoethanolamines		C41H80NO7P	+Na-2H	750.542	0.996645	0.568217	0.936283	0.530227
279	279-3	HMDB0009049	PE(18:1/P-18:0)	Lipids and lipid-like molecules	Glycerophospholipids	Glycerophosphoethanolamines		C41H80NO7P	+Na-2H	750.542	0.996645	0.568217	0.936283	0.530227
279	279-4	HMDB0009279	PE(20:1/P-16:0)	Lipids and lipid-like molecules	Glycerophospholipids	Glycerophosphoethanolamines		C41H80NO7P	+Na-2H	750.542	0.996645	0.568217	0.936283	0.530227
279	279-5	HMDB0011271	PC(P-18:1/15:0)	Lipids and lipid-like molecules	Glycerophospholipids	Glycerophosphocholines		C41H80NO7P	+Na-2H	750.542	0.996645	0.568217	0.936283	0.530227
279	279-6	HMDB0011348	PE(P-16:0/20:1)	Lipids and lipid-like molecules	Glycerophospholipids	Glycerophosphoethanolamines		C41H80NO7P	+Na-2H	750.542	0.996645	0.568217	0.936283	0.530227
279	279-7	HMDB0011406	PE(P-18:1/18:0)	Lipids and lipid-like molecules	Glycerophospholipids	Glycerophosphoethanolamines		C41H80NO7P	+Na-2H	750.542	0.996645	0.568217	0.936283	0.530227
280	280-1	HMDB0008946	PE(38:6)	Lipids and lipid-like molecules	Glycerophospholipids	Glycerophosphoethanolamines		C43H74NO8P	-H	762.508	0.996521	0.664615	0.921325	0.610196
280	280-2	HMDB0113036	PE-NMe(37:6)	Lipids and lipid-like molecules	Glycerophospholipids	Glycerophosphoethanolamines		C43H74NO8P	-H	762.508	0.996521	0.664615	0.921325	0.610196
280	280-3	HMDB0113896	PE-NMe2(36:6)	Lipids and lipid-like molecules	Glycerophospholipids	Glycerophosphoethanolamines		C43H74NO8P	-H	762.508	0.996521	0.664615	0.921325	0.610196
281	281-1	HMDB0012360	PS(36:3)	Lipids and lipid-like molecules	Glycerophospholipids	Glycerophosphoserines		C42H76NO10P	-H2O-H	766.503	0.990767	0.563624	0.537683	0.300253
282	282-1	HMDB0007872	PC(32:1)	Lipids and lipid-like molecules	Glycerophospholipids	Glycerophosphocholines		C40H78NO8P	+Cl	766.515	0.996621	0.706404	0.519089	0.365448
282	282-2	HMDB0008900	PE(35:1)	Lipids and lipid-like molecules	Glycerophospholipids	Glycerophosphoethanolamines		C40H78NO8P	+Cl	766.515	0.996621	0.706404	0.519089	0.365448
283	283-1	HMDB0033621	Araliacerebroside	Lipids and lipid-like molecules	Sphingolipids	Glycosphingolipids		C40H77NO10	+Cl	766.523	0.998554	0.589266	0.656529	0.386311
284	284-1	HMDB0007938	PC(33:1)	Lipids and lipid-like molecules	Glycerophospholipids	Glycerophosphocholines	C00157	C41H80NO8P	+Na-2H	766.537	0.997023	0.551747	0.940737	0.517503
284	284-2	HMDB0008842	PE(36:1)	Lipids and lipid-like molecules	Glycerophospholipids	Glycerophosphoethanolamines	C00350	C41H80NO8P	+Na-2H	766.537	0.997023	0.551747	0.940737	0.517503
285	285-1	HMDB0115168	PA(42:10)	Lipids and lipid-like molecules	Glycerophospholipids	Glycerophosphates		C45H69O8P	-H	767.466	0.996439	0.523247	0.941576	0.490923
286	286-1	HMDB0030750	1,26-Dicaffeoylhexacosanediol	Phenylpropanoids and polyketides	Cinnamic acids and derivatives	Hydroxycinnamic acids and derivatives		C44H66O8	+HCOO	767.474	0.995868	0.661491	0.913428	0.601728
287	287-1	HMDB0010595	PG(36:5)	Lipids and lipid-like molecules	Glycerophospholipids	Glycerophosphoglycerols		C42H73O10P	-H	767.487	0.995783	0.776233	0.631866	0.488408
288	288-1	HMDB0112331	PS(35:4)	Lipids and lipid-like molecules	Glycerophospholipids	Glycerophosphoserines		C41H72NO10P	-H	768.482	0.994401	0.697086	0.717938	0.497662
289	289-1	HMDB0009111	PE(40:8)	Lipids and lipid-like molecules	Glycerophospholipids	Glycerophosphoethanolamines		C45H74NO8P	-H2O-H	768.497	0.994382	0.74268	0.577112	0.426201
289	289-2	HMDB0114113	PE-NMe2(38:8)	Lipids and lipid-like molecules	Glycerophospholipids	Glycerophosphoethanolamines		C45H74NO8P	-H2O-H	768.497	0.994382	0.74268	0.577112	0.426201
290	290-1	HMDB0000564	PC(32:0)	Lipids and lipid-like molecules	Glycerophospholipids	Glycerophosphocholines	C00157	C40H80NO8P	+Cl	768.531	0.995855	0.828646	0.902235	0.744534
290	290-2	HMDB0008899	PE(35:0)	Lipids and lipid-like molecules	Glycerophospholipids	Glycerophosphoethanolamines		C40H80NO8P	+Cl	768.531	0.995855	0.828646	0.902235	0.744534
291	291-1	HMDB0115166	PA(42:9)	Lipids and lipid-like molecules	Glycerophospholipids	Glycerophosphates		C45H71O8P	-H	769.481	0.995885	0.551034	0.938795	0.515179
292	292-1	HMDB0010580	PG(36:4)	Lipids and lipid-like molecules	Glycerophospholipids	Glycerophosphoglycerols		C42H75O10P	-H	769.503	0.99683	0.890737	0.882896	0.783935
293	293-1	HMDB0112329	PS(35:3)	Lipids and lipid-like molecules	Glycerophospholipids	Glycerophosphoserines		C41H74NO10P	-H	770.498	0.996261	0.7002	0.969573	0.676356
294	294-1	HMDB0114866	PA(38:3)	Lipids and lipid-like molecules	Glycerophospholipids	Glycerophosphates		C41H75O8P	+HCOO	771.518	0.996803	0.856149	0.693025	0.591436
295	295-1	HMDB0007875	PC(32:3)	Lipids and lipid-like molecules	Glycerophospholipids	Glycerophosphocholines		C40H74NO8P	+HCOO	772.513	0.997017	0.75729	0.864653	0.65284
295	295-2	HMDB0008902	PE(35:3)	Lipids and lipid-like molecules	Glycerophospholipids	Glycerophosphoethanolamines		C40H74NO8P	+HCOO	772.513	0.997017	0.75729	0.864653	0.65284
296	296-1	HMDB0005779	PE(P-18:0/20:4)	Lipids and lipid-like molecules	Glycerophospholipids	Glycerophosphoethanolamines	C00350	C43H78NO7P	+Na-2H	772.526	0.996332	0.885705	0.704742	0.621904
296	296-2	HMDB0009347	PE(20:3/P-18:1)	Lipids and lipid-like molecules	Glycerophospholipids	Glycerophosphoethanolamines		C43H78NO7P	+Na-2H	772.526	0.996332	0.885705	0.704742	0.621904
296	296-3	HMDB0009412	PE(20:4/P-18:0)	Lipids and lipid-like molecules	Glycerophospholipids	Glycerophosphoethanolamines		C43H78NO7P	+Na-2H	772.526	0.996332	0.885705	0.704742	0.621904
296	296-4	HMDB0009609	PE(22:4/P-16:0)	Lipids and lipid-like molecules	Glycerophospholipids	Glycerophosphoethanolamines		C43H78NO7P	+Na-2H	772.526	0.996332	0.885705	0.704742	0.621904
296	296-5	HMDB0011358	PE(P-16:0/22:4)	Lipids and lipid-like molecules	Glycerophospholipids	Glycerophosphoethanolamines		C43H78NO7P	+Na-2H	772.526	0.996332	0.885705	0.704742	0.621904
296	296-6	HMDB0011416	PE(P-18:1/20:3)	Lipids and lipid-like molecules	Glycerophospholipids	Glycerophosphoethanolamines		C43H78NO7P	+Na-2H	772.526	0.996332	0.885705	0.704742	0.621904
297	297-1	HMDB0114811	PA(38:2)	Lipids and lipid-like molecules	Glycerophospholipids	Glycerophosphates		C41H77O8P	+HCOO	773.534	0.996838	0.888056	0.803666	0.711443
298	298-1	HMDB0112285	PS(35:1)	Lipids and lipid-like molecules	Glycerophospholipids	Glycerophosphoserines		C41H78NO10P	-H	774.529	0.996334	0.666424	0.960433	0.637709
299	299-1	HMDB0009314	PE(20:2/P-18:1)	Lipids and lipid-like molecules	Glycerophospholipids	Glycerophosphoethanolamines		C43H80NO7P	+Na-2H	774.542	0.996785	0.866787	0.937719	0.810189
299	299-2	HMDB0009346	PE(20:3/P-18:0)	Lipids and lipid-like molecules	Glycerophospholipids	Glycerophosphoethanolamines		C43H80NO7P	+Na-2H	774.542	0.996785	0.866787	0.937719	0.810189
299	299-3	HMDB0011383	PE(P-18:0/20:3)	Lipids and lipid-like molecules	Glycerophospholipids	Glycerophosphoethanolamines		C43H80NO7P	+Na-2H	774.542	0.996785	0.866787	0.937719	0.810189
299	299-4	HMDB0011415	PE(P-18:1/20:2)	Lipids and lipid-like molecules	Glycerophospholipids	Glycerophosphoethanolamines		C43H80NO7P	+Na-2H	774.542	0.996785	0.866787	0.937719	0.810189
300	300-1	HMDB0009709	PE(22:6/P-18:0)	Lipids and lipid-like molecules	Glycerophospholipids	Glycerophosphoethanolamines		C45H78NO7P	-H	774.544	0.997053	0.855685	0.93475	0.797495
300	300-2	HMDB0011394	PE(P-18:0/22:6)	Lipids and lipid-like molecules	Glycerophospholipids	Glycerophosphoethanolamines		C45H78NO7P	-H	774.544	0.997053	0.855685	0.93475	0.797495
301	301-1	HMDB0010603	PG(36:1)	Lipids and lipid-like molecules	Glycerophospholipids	Glycerophosphoglycerols		C42H81O10P	-H	775.549	0.996411	0.743367	0.956931	0.708798
302	302-1	HMDB0031680	1-O-beta-D-Glucopyranosyl-2,3-di-O-palmitoylglycerol	Lipids and lipid-like molecules	Glycerolipids	Glycosylglycerols		C41H78O10	+HCOO	775.558	0.996638	0.672529	0.86344	0.578737
303	303-1	HMDB0009281	PE(20:1/P-18:1)	Lipids and lipid-like molecules	Glycerophospholipids	Glycerophosphoethanolamines		C43H82NO7P	+Na-2H	776.558	0.996459	0.583874	0.934118	0.543476
303	303-2	HMDB0009313	PE(20:2/P-18:0)	Lipids and lipid-like molecules	Glycerophospholipids	Glycerophosphoethanolamines		C43H82NO7P	+Na-2H	776.558	0.996459	0.583874	0.934118	0.543476
303	303-3	HMDB0009576	PE(22:2/P-16:0)	Lipids and lipid-like molecules	Glycerophospholipids	Glycerophosphoethanolamines		C43H82NO7P	+Na-2H	776.558	0.996459	0.583874	0.934118	0.543476
303	303-4	HMDB0011357	PE(P-16:0/22:2)	Lipids and lipid-like molecules	Glycerophospholipids	Glycerophosphoethanolamines		C43H82NO7P	+Na-2H	776.558	0.996459	0.583874	0.934118	0.543476
303	303-5	HMDB0011382	PE(P-18:0/20:2)	Lipids and lipid-like molecules	Glycerophospholipids	Glycerophosphoethanolamines		C43H82NO7P	+Na-2H	776.558	0.996459	0.583874	0.934118	0.543476
303	303-6	HMDB0011414	PE(P-18:1/20:1)	Lipids and lipid-like molecules	Glycerophospholipids	Glycerophosphoethanolamines		C43H82NO7P	+Na-2H	776.558	0.996459	0.583874	0.934118	0.543476
304	304-1	HMDB0007955	PC(37:4)	Lipids and lipid-like molecules	Glycerophospholipids	Glycerophosphocholines		C45H82NO8P	-H2O-H	776.56	0.99664	0.57812	0.930409	0.536081
304	304-2	HMDB0009009	PE(40:4)	Lipids and lipid-like molecules	Glycerophospholipids	Glycerophosphoethanolamines		C45H82NO8P	-H2O-H	776.56	0.99664	0.57812	0.930409	0.536081
305	305-1	HMDB0012317	3-O-Sulfogalactosylceramide (d18:1/18:1)	Lipids and lipid-like molecules	Sphingolipids	Glycosphingolipids	C06125	C42H79NO11S	-H2O-H	786.52	0.997289	0.733973	0.903327	0.66122
306	306-1	HMDB0012380	PS(36:2)	Lipids and lipid-like molecules	Glycerophospholipids	Glycerophosphoserines		C42H78NO10P	-H	786.529	0.997008	0.843614	0.703659	0.59184
307	307-1	HMDB0004866	LacCer(d30:1)					C42H79NO13	-H2O-H	786.537	0.997097	0.799807	0.522405	0.41661
308	308-1	HMDB0012314	3-O-Sulfogalactosylceramide (d18:1/18:0)	Lipids and lipid-like molecules	Sphingolipids	Glycosphingolipids	C06125	C42H81NO11S	-H2O-H	788.535	0.997449	0.804167	0.854257	0.685213
309	309-1	HMDB0010163	PS(36:1)	Lipids and lipid-like molecules	Glycerophospholipids	Glycerophosphoserines	C02737	C42H80NO10P	-H	788.545	0.997464	0.858316	0.975256	0.834955
310	310-1	HMDB0008161	PC(18:2/P-18:1)	Lipids and lipid-like molecules	Glycerophospholipids	Glycerophosphocholines		C44H82NO7P	+Na-2H	788.558	0.997436	0.816595	0.955355	0.778138
310	310-2	HMDB0008193	PC(18:3/P-18:0)	Lipids and lipid-like molecules	Glycerophospholipids	Glycerophosphocholines		C44H82NO7P	+Na-2H	788.558	0.997436	0.816595	0.955355	0.778138
310	310-3	HMDB0008390	PC(20:3/P-16:0)	Lipids and lipid-like molecules	Glycerophospholipids	Glycerophosphocholines		C44H82NO7P	+Na-2H	788.558	0.997436	0.816595	0.955355	0.778138
310	310-4	HMDB0011218	PC(P-16:0/20:3)	Lipids and lipid-like molecules	Glycerophospholipids	Glycerophosphocholines		C44H82NO7P	+Na-2H	788.558	0.997436	0.816595	0.955355	0.778138
310	310-5	HMDB0011245	PC(P-18:0/18:3)	Lipids and lipid-like molecules	Glycerophospholipids	Glycerophosphocholines		C44H82NO7P	+Na-2H	788.558	0.997436	0.816595	0.955355	0.778138
310	310-6	HMDB0011277	PC(P-18:1/18:2)	Lipids and lipid-like molecules	Glycerophospholipids	Glycerophosphocholines		C44H82NO7P	+Na-2H	788.558	0.997436	0.816595	0.955355	0.778138
310	310-7	HMDB0013407	PC(O-16:0/20:4)	Lipids and lipid-like molecules	Glycerophospholipids	Glycerophosphocholines		C44H82NO7P	+Na-2H	788.558	0.997436	0.816595	0.955355	0.778138
310	310-8	HMDB0013435	PC(O-18:2/18:2)	Lipids and lipid-like molecules	Glycerophospholipids	Glycerophosphocholines		C44H82NO7P	+Na-2H	788.558	0.997436	0.816595	0.955355	0.778138
311	311-1	HMDB0007989	PC(38:5)	Lipids and lipid-like molecules	Glycerophospholipids	Glycerophosphocholines		C46H82NO8P	-H2O-H	788.56	0.997125	0.583504	0.930508	0.541394
311	311-2	HMDB0113105	PE-NMe(40:5)	Lipids and lipid-like molecules	Glycerophospholipids	Glycerophosphoethanolamines		C46H82NO8P	-H2O-H	788.56	0.997125	0.583504	0.930508	0.541394
312	312-1	HMDB0115591	PA(41:3)	Lipids and lipid-like molecules	Glycerophospholipids	Glycerophosphates		C44H81O8P	+Na-2H	789.542	0.997549	0.661964	0.866429	0.572139
313	313-1	HMDB0007947	PC(35:3)	Lipids and lipid-like molecules	Glycerophospholipids	Glycerophosphocholines		C43H80NO8P	+Na-2H	790.537	0.997549	0.622933	0.948773	0.589573
314	314-1	HMDB0034602	Hebevinoside XII	Lipids and lipid-like molecules	Prenol lipids	Sesquiterpenoids		C43H70O13	-H	793.475	0.995728	0.507558	0.955542	0.482921
314	314-2	HMDB0035982	Hebevinoside III	Lipids and lipid-like molecules	Steroids and steroid derivatives	Steroidal glycosides		C43H70O13	-H	793.475	0.995728	0.507558	0.955542	0.482921
315	315-1	HMDB0115373	PA(44:11)	Lipids and lipid-like molecules	Glycerophospholipids	Glycerophosphates		C47H71O8P	-H	793.482	0.997236	0.74298	0.928133	0.687678
316	316-1	HMDB0010578	PG(36:3)	Lipids and lipid-like molecules	Glycerophospholipids	Glycerophosphoglycerols		C42H77O10P	+Na-2H	793.5	0.997211	0.959787	0.949657	0.908927
317	317-1	HMDB0010584	PG(38:6)	Lipids and lipid-like molecules	Glycerophospholipids	Glycerophosphoglycerols		C44H75O10P	-H	793.503	0.997199	0.958329	0.941642	0.899875
318	318-1	HMDB0030449	20-Deoxynarasin	Lipids and lipid-like molecules	Prenol lipids	Terpene glycosides		C43H72O10	+HCOO	793.511	0.99725	0.932405	0.864479	0.803828
319	319-1	HMDB0041202	1,2-Di-O-palmitoyl-3-O-(6-sulfoquinovopyranosyl)glycerol	Lipids and lipid-like molecules	Glycerolipids	Glycosylglycerols		C41H78O12S	-H	793.514	0.997085	0.961924	0.780264	0.748366
320	320-1	HMDB0112328	PS(35:2)	Lipids and lipid-like molecules	Glycerophospholipids	Glycerophosphoserines		C41H76NO10P	+Na-2H	794.495	0.997157	0.746135	0.944738	0.702898
321	321-1	HMDB0061474	PE(DiMe(11,3)/DiMe(9,3))	Lipids and lipid-like molecules	Glycerophospholipids	Glycerophosphoethanolamines		C43H74NO10P	-H	794.498	0.997379	0.846584	0.979797	0.827307
321	321-2	HMDB0061498	PE(DiMe(9,3)/DiMe(11,3))	Lipids and lipid-like molecules	Glycerophospholipids	Glycerophosphoethanolamines		C43H74NO10P	-H	794.498	0.997379	0.846584	0.979797	0.827307
321	321-3	HMDB0061502	PE(DiMe(9,3)/DiMe(9,5))	Lipids and lipid-like molecules	Glycerophospholipids	Glycerophosphoethanolamines		C43H74NO10P	-H	794.498	0.997379	0.846584	0.979797	0.827307
321	321-4	HMDB0061510	PE(DiMe(9,5)/DiMe(9,3))	Lipids and lipid-like molecules	Glycerophospholipids	Glycerophosphoethanolamines		C43H74NO10P	-H	794.498	0.997379	0.846584	0.979797	0.827307
321	321-5	HMDB0061521	PE(MonoMe(11,3)/MonoMe(11,3))	Lipids and lipid-like molecules	Glycerophospholipids	Glycerophosphoethanolamines		C43H74NO10P	-H	794.498	0.997379	0.846584	0.979797	0.827307
321	321-6	HMDB0061524	PE(MonoMe(11,3)/MonoMe(9,5))	Lipids and lipid-like molecules	Glycerophospholipids	Glycerophosphoethanolamines		C43H74NO10P	-H	794.498	0.997379	0.846584	0.979797	0.827307
321	321-7	HMDB0061548	PE(MonoMe(9,5)/MonoMe(11,3))	Lipids and lipid-like molecules	Glycerophospholipids	Glycerophosphoethanolamines		C43H74NO10P	-H	794.498	0.997379	0.846584	0.979797	0.827307
321	321-8	HMDB0061551	PE(MonoMe(9,5)/MonoMe(9,5))	Lipids and lipid-like molecules	Glycerophospholipids	Glycerophosphoethanolamines		C43H74NO10P	-H	794.498	0.997379	0.846584	0.979797	0.827307
322	322-1	HMDB0009710	PE(22:6/P-18:1)	Lipids and lipid-like molecules	Glycerophospholipids	Glycerophosphoethanolamines		C45H76NO7P	+Na-2H	794.511	0.997018	0.937254	0.853422	0.797488
322	322-2	HMDB0011427	PE(P-18:1/22:6)	Lipids and lipid-like molecules	Glycerophospholipids	Glycerophosphoethanolamines		C45H76NO7P	+Na-2H	794.511	0.997018	0.937254	0.853422	0.797488
323	323-1	HMDB0009342	PE(42:9)	Lipids and lipid-like molecules	Glycerophospholipids	Glycerophosphoethanolamines		C47H76NO8P	-H2O-H	794.513	0.99704	0.937333	0.847841	0.792358
324	324-1	HMDB0007879	PC(34:1)	Lipids and lipid-like molecules	Glycerophospholipids	Glycerophosphocholines	C00157	C42H82NO8P	+Cl	794.546	0.990556	0.579536	0.896834	0.514839
325	325-1	HMDB0115346	PA(44:10)	Lipids and lipid-like molecules	Glycerophospholipids	Glycerophosphates		C47H73O8P	-H	795.497	0.997559	0.618227	0.937485	0.578164
326	326-1	HMDB0030751	1,26-Hexacosanediol diferulate	Phenylpropanoids and polyketides	Cinnamic acids and derivatives	Hydroxycinnamic acids and derivatives		C46H70O8	+HCOO	795.505	0.996771	0.779346	0.901628	0.700411
326	326-2	HMDB0038064	1,28-Dicaffeoyloctacosanediol	Phenylpropanoids and polyketides	Cinnamic acids and derivatives	Hydroxycinnamic acids and derivatives		C46H70O8	+HCOO	795.505	0.996771	0.779346	0.901628	0.700411
327	327-1	HMDB0010605	PG(36:2)	Lipids and lipid-like molecules	Glycerophospholipids	Glycerophosphoglycerols		C42H79O10P	+Na-2H	795.516	0.996859	0.876773	0.982123	0.858395
328	328-1	HMDB0010582	PG(38:5)	Lipids and lipid-like molecules	Glycerophospholipids	Glycerophosphoglycerols		C44H77O10P	-H	795.518	0.996871	0.878407	0.969477	0.848931
329	329-1	HMDB0112336	PS(37:4)	Lipids and lipid-like molecules	Glycerophospholipids	Glycerophosphoserines		C43H76NO10P	-H	796.514	0.996417	0.628148	0.894626	0.559944
330	330-1	HMDB0009309	PE(42:8)	Lipids and lipid-like molecules	Glycerophospholipids	Glycerophosphoethanolamines		C47H78NO8P	-H2O-H	796.529	0.996194	0.708163	0.966522	0.681851
330	330-2	HMDB0113877	PE-NMe2(40:8)	Lipids and lipid-like molecules	Glycerophospholipids	Glycerophosphoethanolamines		C47H78NO8P	-H2O-H	796.529	0.996194	0.708163	0.966522	0.681851
331	331-1	HMDB0009408	PE(42:10)	Lipids and lipid-like molecules	Glycerophospholipids	Glycerophosphoethanolamines		C47H74NO8P	-H	810.508	0.995876	0.570025	0.935201	0.53089
332	332-1	HMDB0010165	PS(38:4)	Lipids and lipid-like molecules	Glycerophospholipids	Glycerophosphoserines	C02737	C44H78NO10P	-H	810.529	0.996945	0.865793	0.887545	0.766082
333	333-1	HMDB0008523	PC(20:5/P-18:1)	Lipids and lipid-like molecules	Glycerophospholipids	Glycerophosphocholines		C46H80NO7P	+Na-2H	810.542	0.996787	0.850129	0.62766	0.531878
333	333-2	HMDB0008751	PC(22:6/P-16:0)	Lipids and lipid-like molecules	Glycerophospholipids	Glycerophosphocholines	C00157	C46H80NO7P	+Na-2H	810.542	0.996787	0.850129	0.62766	0.531878
333	333-3	HMDB0011229	PC(P-16:0/22:6)	Lipids and lipid-like molecules	Glycerophospholipids	Glycerophosphocholines		C46H80NO7P	+Na-2H	810.542	0.996787	0.850129	0.62766	0.531878
333	333-4	HMDB0011288	PC(P-18:1/20:5)	Lipids and lipid-like molecules	Glycerophospholipids	Glycerophosphocholines		C46H80NO7P	+Na-2H	810.542	0.996787	0.850129	0.62766	0.531878
334	334-1	HMDB0008156	PC(40:8)	Lipids and lipid-like molecules	Glycerophospholipids	Glycerophosphocholines		C48H80NO8P	-H2O-H	810.544	0.996791	0.761339	0.624494	0.473926
335	335-1	HMDB0009611	PE(22:4/P-18:1)	Lipids and lipid-like molecules	Glycerophospholipids	Glycerophosphoethanolamines		C45H80NO7P	+Cl	812.536	0.99712	0.525636	0.868223	0.455055
335	335-2	HMDB0009643	PE(22:5/P-18:0)	Lipids and lipid-like molecules	Glycerophospholipids	Glycerophosphoethanolamines		C45H80NO7P	+Cl	812.536	0.99712	0.525636	0.868223	0.455055
335	335-3	HMDB0011392	PE(P-18:0/22:5)	Lipids and lipid-like molecules	Glycerophospholipids	Glycerophosphoethanolamines		C45H80NO7P	+Cl	812.536	0.99712	0.525636	0.868223	0.455055
335	335-4	HMDB0011424	PE(P-18:1/22:4)	Lipids and lipid-like molecules	Glycerophospholipids	Glycerophosphoethanolamines		C45H80NO7P	+Cl	812.536	0.99712	0.525636	0.868223	0.455055
336	336-1	HMDB0012378	PS(36:0)	Lipids and lipid-like molecules	Glycerophospholipids	Glycerophosphoserines		C42H82NO10P	+Na-2H	812.542	0.996708	0.719354	0.965638	0.692349
337	337-1	HMDB0008457	PC(20:4/P-18:1)	Lipids and lipid-like molecules	Glycerophospholipids	Glycerophosphocholines		C46H82NO7P	+Na-2H	812.558	0.99633	0.640738	0.915642	0.584533
337	337-2	HMDB0008522	PC(20:5/P-18:0)	Lipids and lipid-like molecules	Glycerophospholipids	Glycerophosphocholines	C00157	C46H82NO7P	+Na-2H	812.558	0.99633	0.640738	0.915642	0.584533
337	337-3	HMDB0008685	PC(22:5/P-16:0)	Lipids and lipid-like molecules	Glycerophospholipids	Glycerophosphocholines		C46H82NO7P	+Na-2H	812.558	0.99633	0.640738	0.915642	0.584533
337	337-4	HMDB0011227	PC(P-16:0/22:5)	Lipids and lipid-like molecules	Glycerophospholipids	Glycerophosphocholines		C46H82NO7P	+Na-2H	812.558	0.99633	0.640738	0.915642	0.584533
337	337-5	HMDB0011255	PC(P-18:0/20:5)	Lipids and lipid-like molecules	Glycerophospholipids	Glycerophosphocholines		C46H82NO7P	+Na-2H	812.558	0.99633	0.640738	0.915642	0.584533
337	337-6	HMDB0011286	PC(P-18:1/20:4)	Lipids and lipid-like molecules	Glycerophospholipids	Glycerophosphocholines		C46H82NO7P	+Na-2H	812.558	0.99633	0.640738	0.915642	0.584533
337	337-7	HMDB0013409	PC(O-16:0/22:6)	Lipids and lipid-like molecules	Glycerophospholipids	Glycerophosphocholines		C46H82NO7P	+Na-2H	812.558	0.99633	0.640738	0.915642	0.584533
338	338-1	HMDB0008090	PC(40:7)	Lipids and lipid-like molecules	Glycerophospholipids	Glycerophosphocholines		C48H82NO8P	-H2O-H	812.56	0.997181	0.585865	0.907978	0.530453
339	339-1	HMDB0039398	Quinquenoside F1	Lipids and lipid-like molecules	Prenol lipids	Triterpenoids		C42H74O15	-H	817.496	0.99581	0.65648	0.871297	0.569593
340	340-1	HMDB0010659	PG(40:8)	Lipids and lipid-like molecules	Glycerophospholipids	Glycerophosphoglycerols		C46H75O10P	-H	817.503	0.995624	0.691147	0.789429	0.543224
341	341-1	HMDB0008240	PC(36:8)	Lipids and lipid-like molecules	Glycerophospholipids	Glycerophosphocholines		C44H72NO8P	+HCOO	818.498	0.993053	0.589047	0.850087	0.497263
341	341-2	HMDB0113211	PE-NMe(38:8)	Lipids and lipid-like molecules	Glycerophospholipids	Glycerophosphoethanolamines		C44H72NO8P	+HCOO	818.498	0.993053	0.589047	0.850087	0.497263
342	342-1	HMDB0010581	PG(38:4)	Lipids and lipid-like molecules	Glycerophospholipids	Glycerophosphoglycerols		C44H79O10P	+Na-2H	819.516	0.995507	0.692782	0.909039	0.626937
343	343-1	HMDB0010629	PG(40:7)	Lipids and lipid-like molecules	Glycerophospholipids	Glycerophosphoglycerols		C46H77O10P	-H	819.518	0.995826	0.706208	0.86036	0.605057
344	344-1	HMDB0007925	PC(36:7)	Lipids and lipid-like molecules	Glycerophospholipids	Glycerophosphocholines		C44H74NO8P	+HCOO	820.513	0.994386	0.583852	0.950753	0.551983
345	345-1	HMDB0115087	PA(42:6)	Lipids and lipid-like molecules	Glycerophospholipids	Glycerophosphates		C45H77O8P	+HCOO	821.534	0.994927	0.55639	0.938002	0.519247
346	346-1	HMDB0009784	PI(34:2)	Lipids and lipid-like molecules	Glycerophospholipids	Glycerophosphoinositols		C43H79O13P	-H	833.519	0.993818	0.618806	0.542444	0.333592
347	347-1	HMDB0009705	PE(44:12)	Lipids and lipid-like molecules	Glycerophospholipids	Glycerophosphoethanolamines		C49H74NO8P	-H	834.508	0.997216	0.768125	0.908821	0.696144
348	348-1	HMDB0012382	PS(38:3)	Lipids and lipid-like molecules	Glycerophospholipids	Glycerophosphoserines		C44H80NO10P	+Na-2H	834.527	0.996933	0.912664	0.91464	0.832199
349	349-1	HMDB0010167	PS(40:6)	Lipids and lipid-like molecules	Glycerophospholipids	Glycerophosphoserines	C02737	C46H78NO10P	-H	834.529	0.996829	0.944319	0.884217	0.832336
350	350-1	HMDB0008452	PC(42:10)	Lipids and lipid-like molecules	Glycerophospholipids	Glycerophosphocholines		C50H80NO8P	-H2O-H	834.544	0.996956	0.804719	0.675553	0.541975
351	351-1	HMDB0029550	Amitenone	Lipids and lipid-like molecules	Prenol lipids	Diterpenoids		C53H72O8	-H	835.515	0.996993	0.801835	0.894372	0.714983
352	352-1	HMDB0014916	Roxithromycin	Organic oxygen compounds	Organooxygen compounds	Carbohydrates and carbohydrate conjugates	C13173	C41H76N2O15	-H	835.517	0.997513	0.666821	0.940972	0.6259
353	353-1	HMDB0010608	PG(38:3)	Lipids and lipid-like molecules	Glycerophospholipids	Glycerophosphoglycerols		C44H81O10P	+Cl	835.525	0.996871	0.747139	0.874776	0.651534
354	354-1	HMDB0009639	PE(44:11)	Lipids and lipid-like molecules	Glycerophospholipids	Glycerophosphoethanolamines		C49H76NO8P	-H	836.524	0.997067	0.668924	0.913286	0.609128
355	355-1	HMDB0112292	PS(38:2)	Lipids and lipid-like molecules	Glycerophospholipids	Glycerophosphoserines		C44H82NO10P	+Na-2H	836.542	0.996717	0.878594	0.984576	0.862203
356	356-1	HMDB0061477	PE(DiMe(11,3)/MonoMe(11,5))	Lipids and lipid-like molecules	Glycerophospholipids	Glycerophosphoethanolamines		C46H80NO10P	-H	836.545	0.996688	0.859468	0.965673	0.827217
356	356-2	HMDB0061513	PE(DiMe(9,5)/MonoMe(11,5))	Lipids and lipid-like molecules	Glycerophospholipids	Glycerophosphoethanolamines		C46H80NO10P	-H	836.545	0.996688	0.859468	0.965673	0.827217
356	356-3	HMDB0061517	PE(MonoMe(11,3)/DiMe(11,5))	Lipids and lipid-like molecules	Glycerophospholipids	Glycerophosphoethanolamines		C46H80NO10P	-H	836.545	0.996688	0.859468	0.965673	0.827217
356	356-4	HMDB0061525	PE(MonoMe(11,5)/DiMe(11,3))	Lipids and lipid-like molecules	Glycerophospholipids	Glycerophosphoethanolamines		C46H80NO10P	-H	836.545	0.996688	0.859468	0.965673	0.827217
356	356-5	HMDB0061529	PE(MonoMe(11,5)/DiMe(9,5))	Lipids and lipid-like molecules	Glycerophospholipids	Glycerophosphoethanolamines		C46H80NO10P	-H	836.545	0.996688	0.859468	0.965673	0.827217
356	356-6	HMDB0061544	PE(MonoMe(9,5)/DiMe(11,5))	Lipids and lipid-like molecules	Glycerophospholipids	Glycerophosphoethanolamines		C46H80NO10P	-H	836.545	0.996688	0.859468	0.965673	0.827217
357	357-1	HMDB0008753	PC(22:6/P-18:1)	Lipids and lipid-like molecules	Glycerophospholipids	Glycerophosphocholines		C48H82NO7P	+Na-2H	836.558	0.99655	0.778404	0.856436	0.664353
357	357-2	HMDB0011295	PC(P-18:1/22:6)	Lipids and lipid-like molecules	Glycerophospholipids	Glycerophosphocholines		C48H82NO7P	+Na-2H	836.558	0.99655	0.778404	0.856436	0.664353
358	358-1	HMDB0008387	PC(42:9)	Lipids and lipid-like molecules	Glycerophospholipids	Glycerophosphocholines		C50H82NO8P	-H2O-H	836.56	0.996588	0.818649	0.883432	0.720753
359	359-1	HMDB0009781	PI(34:0)	Lipids and lipid-like molecules	Glycerophospholipids	Glycerophosphoinositols		C43H83O13P	-H	837.55	0.996586	0.730253	0.972941	0.708068
360	360-1	HMDB0061393	PC(DiMe(11,3)/DiMe(9,3))	Lipids and lipid-like molecules	Glycerophospholipids	Glycerophosphocholines		C46H81NO10P	-H	837.553	0.996708	0.736635	0.974668	0.715611
360	360-2	HMDB0061417	PC(DiMe(9,3)/DiMe(11,3))	Lipids and lipid-like molecules	Glycerophospholipids	Glycerophosphocholines		C46H81NO10P	-H	837.553	0.996708	0.736635	0.974668	0.715611
360	360-3	HMDB0061421	PC(DiMe(9,3)/DiMe(9,5))	Lipids and lipid-like molecules	Glycerophospholipids	Glycerophosphocholines		C46H81NO10P	-H	837.553	0.996708	0.736635	0.974668	0.715611
360	360-4	HMDB0061429	PC(DiMe(9,5)/DiMe(9,3))	Lipids and lipid-like molecules	Glycerophospholipids	Glycerophosphocholines		C46H81NO10P	-H	837.553	0.996708	0.736635	0.974668	0.715611
360	360-5	HMDB0061440	PC(MonoMe(11,3)/MonoMe(11,3))	Lipids and lipid-like molecules	Glycerophospholipids	Glycerophosphocholines		C46H81NO10P	-H	837.553	0.996708	0.736635	0.974668	0.715611
360	360-6	HMDB0061443	PC(MonoMe(11,3)/MonoMe(9,5))	Lipids and lipid-like molecules	Glycerophospholipids	Glycerophosphocholines		C46H81NO10P	-H	837.553	0.996708	0.736635	0.974668	0.715611
360	360-7	HMDB0061467	PC(MonoMe(9,5)/MonoMe(11,3))	Lipids and lipid-like molecules	Glycerophospholipids	Glycerophosphocholines		C46H81NO10P	-H	837.553	0.996708	0.736635	0.974668	0.715611
360	360-8	HMDB0061470	PC(MonoMe(9,5)/MonoMe(9,5))	Lipids and lipid-like molecules	Glycerophospholipids	Glycerophosphocholines		C46H81NO10P	-H	837.553	0.996708	0.736635	0.974668	0.715611
361	361-1	HMDB0010614	PG(40:6)	Lipids and lipid-like molecules	Glycerophospholipids	Glycerophosphoglycerols		C46H79O10P	+Cl	857.51	0.997168	0.628713	0.860956	0.539761
362	362-1	HMDB0009782	PI(34:1)	Lipids and lipid-like molecules	Glycerophospholipids	Glycerophosphoinositols		C43H81O13P	+Na-2H	857.516	0.997069	0.797281	0.974197	0.774432
363	363-1	HMDB0009789	PI(36:4)	Lipids and lipid-like molecules	Glycerophospholipids	Glycerophosphoinositols		C45H79O13P	-H	857.519	0.997074	0.786316	0.955468	0.749102
364	364-1	HMDB0013504	PGP(36:0)	Lipids and lipid-like molecules	Glycerophospholipids	Glycerophosphoglycerophosphates		C42H84O13P2	-H	857.532	0.997377	0.696848	0.886392	0.616061
365	365-1	HMDB0112617	PS(42:8)	Lipids and lipid-like molecules	Glycerophospholipids	Glycerophosphoserines		C48H78NO10P	-H	858.529	0.995421	0.591482	0.862077	0.507568
366	366-1	HMDB0116528	PGP(35:0)	Lipids and lipid-like molecules	Glycerophospholipids	Glycerophosphoglycerophosphates		C41H82O13P2	+Na-2H	865.498	0.996168	0.749628	0.976114	0.728918
367	367-1	HMDB0116602	PG(42:9)	Lipids and lipid-like molecules	Glycerophospholipids	Glycerophosphoglycerols		C48H77O10P	+Na-2H	865.5	0.996056	0.725881	0.959002	0.693376
368	368-1	HMDB0116605	PG(44:12)	Lipids and lipid-like molecules	Glycerophospholipids	Glycerophosphoglycerols		C50H75O10P	-H	865.503	0.99616	0.748433	0.960994	0.716478
369	369-1	HMDB0009795	PI(38:5)	Lipids and lipid-like molecules	Glycerophospholipids	Glycerophosphoinositols		C47H81O13P	-H2O-H	865.524	0.996263	0.589256	0.827582	0.485835
370	370-1	HMDB0034202	alpha-Solanine	Phenylpropanoids and polyketides	Depsides and depsidones		C20046	C45H73NO15	-H	866.491	0.99652	0.555759	0.917444	0.508104
370	370-2	HMDB0034357	beta-Solamarine	Lipids and lipid-like molecules	Steroids and steroid derivatives	Steroidal glycosides		C45H73NO15	-H	866.491	0.99652	0.555759	0.917444	0.508104
371	371-1	HMDB0061552	PS(DiMe(11,3)/DiMe(11,3))	Lipids and lipid-like molecules	Glycerophospholipids	Glycerophosphoserines		C46H78NO12P	-H	866.519	0.994924	0.590685	0.9201	0.54073
371	371-2	HMDB0061556	PS(DiMe(11,3)/DiMe(9,5))	Lipids and lipid-like molecules	Glycerophospholipids	Glycerophosphoserines		C46H78NO12P	-H	866.519	0.994924	0.590685	0.9201	0.54073
371	371-3	HMDB0061564	PS(DiMe(11,5)/DiMe(9,3))	Lipids and lipid-like molecules	Glycerophospholipids	Glycerophosphoserines		C46H78NO12P	-H	866.519	0.994924	0.590685	0.9201	0.54073
371	371-4	HMDB0061580	PS(DiMe(9,3)/DiMe(11,5))	Lipids and lipid-like molecules	Glycerophospholipids	Glycerophosphoserines		C46H78NO12P	-H	866.519	0.994924	0.590685	0.9201	0.54073
371	371-5	HMDB0061588	PS(DiMe(9,5)/DiMe(11,3))	Lipids and lipid-like molecules	Glycerophospholipids	Glycerophosphoserines		C46H78NO12P	-H	866.519	0.994924	0.590685	0.9201	0.54073
371	371-6	HMDB0061592	PS(DiMe(9,5)/DiMe(9,5))	Lipids and lipid-like molecules	Glycerophospholipids	Glycerophosphoserines		C46H78NO12P	-H	866.519	0.994924	0.590685	0.9201	0.54073
371	371-7	HMDB0061603	PS(MonoMe(11,3)/MonoMe(11,5))	Lipids and lipid-like molecules	Glycerophospholipids	Glycerophosphoserines		C46H78NO12P	-H	866.519	0.994924	0.590685	0.9201	0.54073
371	371-8	HMDB0061611	PS(MonoMe(11,5)/MonoMe(11,3))	Lipids and lipid-like molecules	Glycerophospholipids	Glycerophosphoserines		C46H78NO12P	-H	866.519	0.994924	0.590685	0.9201	0.54073
371	371-9	HMDB0061614	PS(MonoMe(11,5)/MonoMe(9,5))	Lipids and lipid-like molecules	Glycerophospholipids	Glycerophosphoserines		C46H78NO12P	-H	866.519	0.994924	0.590685	0.9201	0.54073
371	371-10	HMDB0061630	PS(MonoMe(9,5)/MonoMe(11,5))	Lipids and lipid-like molecules	Glycerophospholipids	Glycerophosphoserines		C46H78NO12P	-H	866.519	0.994924	0.590685	0.9201	0.54073
372	372-1	HMDB0116601	PG(42:8)	Lipids and lipid-like molecules	Glycerophospholipids	Glycerophosphoglycerols		C48H79O10P	+Cl	881.509	0.996174	0.577056	0.844894	0.485686
373	373-1	HMDB0009787	PI(36:3)	Lipids and lipid-like molecules	Glycerophospholipids	Glycerophosphoinositols		C45H81O13P	+Na-2H	881.516	0.996062	0.68022	0.743803	0.503957
374	374-1	HMDB0112564	PS(42:7)	Lipids and lipid-like molecules	Glycerophospholipids	Glycerophosphoserines		C48H80NO10P	+Na-2H	882.527	0.994061	0.591065	0.574787	0.337719
375	375-1	HMDB0112835	PS(44:10)	Lipids and lipid-like molecules	Glycerophospholipids	Glycerophosphoserines		C50H78NO10P	-H	882.529	0.994934	0.601962	0.508111	0.304314
376	376-1	HMDB0114601	PE-NMe2(44:12)	Lipids and lipid-like molecules	Glycerophospholipids	Glycerophosphoethanolamines		C51H78NO8P	+Na-2H	884.521	0.99393	0.562288	0.710662	0.397171
377	377-1	HMDB0112537	PS(42:6)	Lipids and lipid-like molecules	Glycerophospholipids	Glycerophosphoserines		C48H82NO10P	+Na-2H	884.542	0.993593	0.650904	0.599715	0.387855
378	378-1	HMDB0112811	PS(44:9)	Lipids and lipid-like molecules	Glycerophospholipids	Glycerophosphoserines		C50H80NO10P	-H	884.545	0.994892	0.629074	0.585305	0.366319
379	379-1	HMDB0240667	PI(36:1)	Lipids and lipid-like molecules	Glycerophospholipids	Glycerophosphoinositols		C45H85O13P	+Na-2H	885.548	0.99792	0.925566	0.986812	0.911459
380	380-1	HMDB0009793	PI(38:4)	Lipids and lipid-like molecules	Glycerophospholipids	Glycerophosphoinositols		C47H83O13P	-H	885.55	0.99761	0.919581	0.977436	0.896683
381	381-1	HMDB0116517	PGP(38:0)	Lipids and lipid-like molecules	Glycerophospholipids	Glycerophosphoglycerophosphates		C44H88O13P2	-H	885.563	0.997652	0.915543	0.914303	0.835119
382	382-1	HMDB0114546	PE-NMe2(44:11)	Lipids and lipid-like molecules	Glycerophospholipids	Glycerophosphoethanolamines		C51H80NO8P	+Na-2H	886.537	0.997405	0.643497	0.930355	0.597127
383	383-1	HMDB0061478	PE(DiMe(11,3)/MonoMe(13,5))	Lipids and lipid-like molecules	Glycerophospholipids	Glycerophosphoethanolamines		C48H84NO10P	+Na-2H	886.558	0.997377	0.818571	0.935486	0.763753
383	383-2	HMDB0061514	PE(DiMe(9,5)/MonoMe(13,5))	Lipids and lipid-like molecules	Glycerophospholipids	Glycerophosphoethanolamines		C48H84NO10P	+Na-2H	886.558	0.997377	0.818571	0.935486	0.763753
383	383-3	HMDB0061534	PE(MonoMe(13,5)/DiMe(11,3))	Lipids and lipid-like molecules	Glycerophospholipids	Glycerophosphoethanolamines		C48H84NO10P	+Na-2H	886.558	0.997377	0.818571	0.935486	0.763753
383	383-4	HMDB0061538	PE(MonoMe(13,5)/DiMe(9,5))	Lipids and lipid-like molecules	Glycerophospholipids	Glycerophosphoethanolamines		C48H84NO10P	+Na-2H	886.558	0.997377	0.818571	0.935486	0.763753
384	384-1	HMDB0112785	PS(44:8)	Lipids and lipid-like molecules	Glycerophospholipids	Glycerophosphoserines		C50H82NO10P	-H	886.56	0.997352	0.773701	0.908927	0.701376
385	385-1	HMDB0009792	PI(38:3)	Lipids and lipid-like molecules	Glycerophospholipids	Glycerophosphoinositols		C47H85O13P	-H	887.566	0.997408	0.511712	0.865076	0.441522
386	386-1	HMDB0061390	PC(DiMe(11,3)/DiMe(11,3))	Lipids and lipid-like molecules	Glycerophospholipids	Glycerophosphocholines		C48H85NO10P	+Na-2H	887.566	0.997293	0.50848	0.86482	0.438553
386	386-2	HMDB0061394	PC(DiMe(11,3)/DiMe(9,5))	Lipids and lipid-like molecules	Glycerophospholipids	Glycerophosphocholines		C48H85NO10P	+Na-2H	887.566	0.997293	0.50848	0.86482	0.438553
386	386-3	HMDB0061402	PC(DiMe(11,5)/DiMe(9,3))	Lipids and lipid-like molecules	Glycerophospholipids	Glycerophosphocholines		C48H85NO10P	+Na-2H	887.566	0.997293	0.50848	0.86482	0.438553
386	386-4	HMDB0061418	PC(DiMe(9,3)/DiMe(11,5))	Lipids and lipid-like molecules	Glycerophospholipids	Glycerophosphocholines		C48H85NO10P	+Na-2H	887.566	0.997293	0.50848	0.86482	0.438553
386	386-5	HMDB0061426	PC(DiMe(9,5)/DiMe(11,3))	Lipids and lipid-like molecules	Glycerophospholipids	Glycerophosphocholines		C48H85NO10P	+Na-2H	887.566	0.997293	0.50848	0.86482	0.438553
386	386-6	HMDB0061430	PC(DiMe(9,5)/DiMe(9,5))	Lipids and lipid-like molecules	Glycerophospholipids	Glycerophosphocholines		C48H85NO10P	+Na-2H	887.566	0.997293	0.50848	0.86482	0.438553
386	386-7	HMDB0061441	PC(MonoMe(11,3)/MonoMe(11,5))	Lipids and lipid-like molecules	Glycerophospholipids	Glycerophosphocholines		C48H85NO10P	+Na-2H	887.566	0.997293	0.50848	0.86482	0.438553
386	386-8	HMDB0061449	PC(MonoMe(11,5)/MonoMe(11,3))	Lipids and lipid-like molecules	Glycerophospholipids	Glycerophosphocholines		C48H85NO10P	+Na-2H	887.566	0.997293	0.50848	0.86482	0.438553
386	386-9	HMDB0061452	PC(MonoMe(11,5)/MonoMe(9,5))	Lipids and lipid-like molecules	Glycerophospholipids	Glycerophosphocholines		C48H85NO10P	+Na-2H	887.566	0.997293	0.50848	0.86482	0.438553
386	386-10	HMDB0061468	PC(MonoMe(9,5)/MonoMe(11,5))	Lipids and lipid-like molecules	Glycerophospholipids	Glycerophosphocholines		C48H85NO10P	+Na-2H	887.566	0.997293	0.50848	0.86482	0.438553

## Sheet: pos
Table S1 The spatial distribution of obtained metabolite positive ions
ID	ID-num	HMDB	Metabolites	Super Class	Class	Sub Class	KEGG	Formula	Adduct	mz	moc	spec	spat	msm
1	1-1	HMDB0000925	Trimethylamine N-oxide	Organic nitrogen compounds	Organonitrogen compounds	Aminoxides	C01104	C3H9NO	+H	76.0757	0.997912	0.723955	0.994991	0.718825
1	1-2	HMDB0012136	1-Amino-propan-2-ol	Organic nitrogen compounds	Organonitrogen compounds	Amines	C05771	C3H9NO	+H	76.0757	0.997912	0.723955	0.994991	0.718825
2	2-1	HMDB0002151	Dimethyl sulfoxide	Organosulfur compounds	Sulfoxides		C11143	C2H6OS	+H	79.0212	0.996884	0.729401	0.995985	0.724209
3	3-1	HMDB0001080	4-Aminobutyraldehyde	Organic oxygen compounds	Organooxygen compounds	Carbonyl compounds	C02903	C4H9NO	+H	88.0757	0.997855	0.649646	0.900112	0.5835
3	3-2	HMDB0031215	N-Ethylacetamide	Organic acids and derivatives	Carboximidic acids and derivatives	Carboximidic acids		C4H9NO	+H	88.0757	0.997855	0.649646	0.900112	0.5835
3	3-3	HMDB0031581	Morpholine	Organoheterocyclic compounds	Oxazinanes	Morpholines	C14452	C4H9NO	+H	88.0757	0.997855	0.649646	0.900112	0.5835
3	3-4	HMDB0033870	Butyramide	Lipids and lipid-like molecules	Fatty Acyls	Fatty amides		C4H9NO	+H	88.0757	0.997855	0.649646	0.900112	0.5835
4	4-1	HMDB0029198	Dimethylurea	Organic acids and derivatives	Organic carbonic acids and derivatives	Ureas	C16364	C3H8N2O	+H	89.0709	0.997215	0.515605	0.994779	0.511484
5	5-1	HMDB0011749	2-Piperidinone	Organoheterocyclic compounds	Piperidines	Piperidinones		C5H9NO	+H	100.076	0.997414	0.760862	0.996261	0.756057
6	6-1	HMDB0006478	Isovaleraldehyde	Organic oxygen compounds	Organooxygen compounds	Carbonyl compounds	C07329	C5H10O	+NH4	104.107	0.998198	0.918402	0.997813	0.914742
6	6-2	HMDB0030124	Prenol	Organic oxygen compounds	Organooxygen compounds	Alcohols and polyols	C01390	C5H10O	+NH4	104.107	0.998198	0.918402	0.997813	0.914742
6	6-3	HMDB0030126	3-Methyl-3-buten-1-ol	Organic oxygen compounds	Organooxygen compounds	Alcohols and polyols		C5H10O	+NH4	104.107	0.998198	0.918402	0.997813	0.914742
6	6-4	HMDB0031206	Pentanal	Organic oxygen compounds	Organooxygen compounds	Carbonyl compounds		C5H10O	+NH4	104.107	0.998198	0.918402	0.997813	0.914742
6	6-5	HMDB0031525	(S)-2-Methylbutanal	Organic oxygen compounds	Organooxygen compounds	Carbonyl compounds		C5H10O	+NH4	104.107	0.998198	0.918402	0.997813	0.914742
6	6-6	HMDB0031526	(±)-2-Methylbutanal	Organic oxygen compounds	Organooxygen compounds	Carbonyl compounds	C02223	C5H10O	+NH4	104.107	0.998198	0.918402	0.997813	0.914742
6	6-7	HMDB0031604	(E)-2-Penten-1-ol	Organic oxygen compounds	Organooxygen compounds	Alcohols and polyols		C5H10O	+NH4	104.107	0.998198	0.918402	0.997813	0.914742
6	6-8	HMDB0031605	1-Penten-3-ol	Organic oxygen compounds	Organooxygen compounds	Alcohols and polyols		C5H10O	+NH4	104.107	0.998198	0.918402	0.997813	0.914742
7	7-1	HMDB0000039	Butyric acid	Lipids and lipid-like molecules	Fatty Acyls	Fatty acids and conjugates	C00246	C4H8O2	+NH4	106.086	0.999346	0.616185	0.975292	0.600568
7	7-2	HMDB0001873	Isobutyric acid	Organic acids and derivatives	Carboxylic acids and derivatives	Carboxylic acids	C02632	C4H8O2	+NH4	106.086	0.999346	0.616185	0.975292	0.600568
7	7-3	HMDB0030062	Methyl propionate	Organic acids and derivatives	Carboxylic acids and derivatives	Carboxylic acid derivatives		C4H8O2	+NH4	106.086	0.999346	0.616185	0.975292	0.600568
7	7-4	HMDB0031217	Ethyl acetate	Organic acids and derivatives	Carboxylic acids and derivatives	Carboxylic acid derivatives	C00849	C4H8O2	+NH4	106.086	0.999346	0.616185	0.975292	0.600568
7	7-5	HMDB0031507	1-Hydroxy-2-butanone	Organic oxygen compounds	Organooxygen compounds	Carbonyl compounds		C4H8O2	+NH4	106.086	0.999346	0.616185	0.975292	0.600568
8	8-1	HMDB0040966	1,3-Octadiene	Hydrocarbons	Unsaturated hydrocarbons	Olefins		C8H14	+H	111.117	0.997774	0.722649	0.993451	0.716318
8	8-2	HMDB0061899	2-(Methylenebutyl)-cyclopropane	Hydrocarbons	Saturated hydrocarbons			C8H14	+H	111.117	0.997774	0.722649	0.993451	0.716318
8	8-3	HMDB0061900	2,4-Octadiene	Hydrocarbons	Unsaturated hydrocarbons	Olefins		C8H14	+H	111.117	0.997774	0.722649	0.993451	0.716318
8	8-4	HMDB0061901	Dimethylhexa-1,4-diene	Hydrocarbons	Unsaturated hydrocarbons	Branched unsaturated hydrocarbons		C8H14	+H	111.117	0.997774	0.722649	0.993451	0.716318
8	8-5	HMDB0061902	2,5-Dimethyl-2,4-hexadiene	Hydrocarbons	Unsaturated hydrocarbons	Branched unsaturated hydrocarbons		C8H14	+H	111.117	0.997774	0.722649	0.993451	0.716318
9	9-1	HMDB0002064	N-Acetylputrescine	Organic acids and derivatives	Carboximidic acids and derivatives	Carboximidic acids	C02714	C6H14N2O	-H2O+H	113.107	0.996729	0.715161	0.985107	0.702206
10	10-1	HMDB0031199	2,5-Dihydro-2,4,5-trimethyloxazole	Organoheterocyclic compounds	Azolines	Oxazolines		C6H11NO	+H	114.091	0.997379	0.814384	0.998315	0.810882
10	10-2	HMDB0031702	1-Piperidinecarboxaldehyde	Organoheterocyclic compounds	Piperidines			C6H11NO	+H	114.091	0.997379	0.814384	0.998315	0.810882
11	11-1	HMDB0031598	2,3-Pentanedione	Organic oxygen compounds	Organooxygen compounds	Carbonyl compounds		C5H8O2	+NH4	118.086	0.998053	0.613401	0.991534	0.607024
11	11-2	HMDB0031648	2,4-Pentanedione	Organic oxygen compounds	Organooxygen compounds	Carbonyl compounds	C15499	C5H8O2	+NH4	118.086	0.998053	0.613401	0.991534	0.607024
12	12-1	HMDB0033971	2-Diethylaminoethanol	Organic nitrogen compounds	Organonitrogen compounds	Amines		C6H15NO	+H	118.123	0.997385	0.74047	0.997364	0.736587
13	13-1	HMDB0000718	Isovaleric acid	Lipids and lipid-like molecules	Fatty Acyls	Fatty acids and conjugates	C08262	C5H10O2	+NH4	120.102	0.998097	0.593755	0.987042	0.584947
13	13-2	HMDB0000892	Valeric acid	Lipids and lipid-like molecules	Fatty Acyls	Fatty acids and conjugates	C00803	C5H10O2	+NH4	120.102	0.998097	0.593755	0.987042	0.584947
13	13-3	HMDB0002176	Ethylmethylacetic acid	Lipids and lipid-like molecules	Fatty Acyls	Fatty acids and conjugates	C18319	C5H10O2	+NH4	120.102	0.998097	0.593755	0.987042	0.584947
14	14-1	HMDB0038140	Santene	Hydrocarbons	Unsaturated hydrocarbons	Branched unsaturated hydrocarbons		C9H14	+H	123.117	0.997016	0.642641	0.983247	0.629989
14	14-2	HMDB0061784	3-Allyl-1-cyclohexene	Hydrocarbons	Unsaturated hydrocarbons	Olefins		C9H14	+H	123.117	0.997016	0.642641	0.983247	0.629989
15	15-1	HMDB0000005	2-Ketobutyric acid	Organic acids and derivatives	Keto acids and derivatives	Short-chain keto acids and derivatives	C00109	C4H6O3	+Na	125.021	0.996668	0.539689	0.949253	0.510594
15	15-2	HMDB0000060	Acetoacetic acid	Organic acids and derivatives	Keto acids and derivatives	Short-chain keto acids and derivatives	C00164	C4H6O3	+Na	125.021	0.996668	0.539689	0.949253	0.510594
15	15-3	HMDB0001172	2-Methyl-3-oxopropanoic acid	Organic oxygen compounds	Organooxygen compounds	Carbonyl compounds	C00349	C4H6O3	+Na	125.021	0.996668	0.539689	0.949253	0.510594
15	15-4	HMDB0001259	Succinic acid semialdehyde	Lipids and lipid-like molecules	Fatty Acyls	Fatty acids and conjugates	C00232	C4H6O3	+Na	125.021	0.996668	0.539689	0.949253	0.510594
15	15-5	HMDB0002217	(S)-Methylmalonic acid semialdehyde	Organic oxygen compounds	Organooxygen compounds	Carbonyl compounds	C06002	C4H6O3	+Na	125.021	0.996668	0.539689	0.949253	0.510594
15	15-6	HMDB0031646	Acetic anhydride	Organic acids and derivatives	Carboxylic acids and derivatives	Dicarboxylic acids and derivatives		C4H6O3	+Na	125.021	0.996668	0.539689	0.949253	0.510594
16	16-1	HMDB0031303	Osmundalactone	Organoheterocyclic compounds	Pyrans	Pyranones and derivatives		C6H8O3	+H	129.055	0.997473	0.584555	0.990745	0.577681
16	16-2	HMDB0031306	3-Hydroxy-4,5-dimethyl-2(5H)-furanone	Organoheterocyclic compounds	Dihydrofurans	Furanones		C6H8O3	+H	129.055	0.997473	0.584555	0.990745	0.577681
16	16-3	HMDB0031847	2-Ethyl-3,4-dihydroxyfuran	Organoheterocyclic compounds	Dihydrofurans	Furanones		C6H8O3	+H	129.055	0.997473	0.584555	0.990745	0.577681
17	17-1	HMDB0060456	cis-3-Chloro-2-propene-1-ol	Organohalogen compounds	Vinyl halides	Vinyl chlorides	C06612	C3H5ClO	+K	130.966	0.996748	0.67259	0.922844	0.618677
17	17-2	HMDB0060514	trans-3-Chloro-2-propene-1-ol	Organohalogen compounds	Vinyl halides	Vinyl chlorides	C06611	C3H5ClO	+K	130.966	0.996748	0.67259	0.922844	0.618677
18	18-1	HMDB0062193	2,2-dichloro-1,1-ethanediol	Organohalogen compounds	Halohydrins	Chlorohydrins	C14860	C2H4Cl2O2	+H	130.966	0.996689	0.675281	0.829866	0.558537
19	19-1	HMDB0029722	1,2,5-Trimethyl-1H-pyrrole	Organoheterocyclic compounds	Pyrroles	Substituted pyrroles		C7H11N	+Na	132.078	0.998512	0.531117	0.950114	0.503871
20	20-1	HMDB0029641	p-Mentha-1,3,5,8-tetraene	Benzenoids	Benzene and substituted derivatives	Phenylpropenes		C10H12	+H	133.101	0.997431	0.67162	0.987899	0.661788
21	21-1	HMDB0012153	3,4-Dihydroxybenzylamine	Benzenoids	Phenols	Benzenediols		C7H9NO2	+H	140.071	0.997479	0.608824	0.985908	0.598731
22	22-1	HMDB0001161	4-Trimethylammoniobutanoic acid	Lipids and lipid-like molecules	Fatty Acyls	Fatty acids and conjugates	C01181	C7H15NO2	+H	146.118	0.997507	0.650025	0.965308	0.62591
23	23-1	HMDB0001257	Spermidine	Organic nitrogen compounds	Organonitrogen compounds	Amines	C00315	C7H19N3	+H	146.165	0.997767	0.571352	0.986387	0.562315
24	24-1	HMDB0013674	1,2,3-Trihydroxybenzene	Benzenoids	Phenols	Benzenetriols and derivatives	C01108	C6H6O3	+Na	149.021	0.997307	0.774972	0.967304	0.747614
24	24-2	HMDB0013675	1,3,5-Trihydroxybenzene	Benzenoids	Phenols	Benzenetriols and derivatives	C02183	C6H6O3	+Na	149.021	0.997307	0.774972	0.967304	0.747614
24	24-3	HMDB0029750	Methyl 2-furoate	Organoheterocyclic compounds	Furans	Furoic acid and derivatives		C6H6O3	+Na	149.021	0.997307	0.774972	0.967304	0.747614
24	24-4	HMDB0030776	Maltol	Organoheterocyclic compounds	Pyrans	Pyranones and derivatives	C11918	C6H6O3	+Na	149.021	0.997307	0.774972	0.967304	0.747614
24	24-5	HMDB0031256	4-Hydroxy-2H-pyran-3-carboxaldehyde	Organoheterocyclic compounds	Pyrans			C6H6O3	+Na	149.021	0.997307	0.774972	0.967304	0.747614
24	24-6	HMDB0032651	(Z)-Tamarindienal	Organic oxygen compounds	Organooxygen compounds	Carbonyl compounds		C6H6O3	+Na	149.021	0.997307	0.774972	0.967304	0.747614
25	25-1	HMDB0002334	Benzoquinoneacetic acid	Organic oxygen compounds	Organooxygen compounds	Carbonyl compounds		C8H6O4	-H2O+H	149.023	0.997041	0.97686	0.998473	0.972483
25	25-2	HMDB0002428	Terephthalic acid	Benzenoids	Benzene and substituted derivatives	Benzoic acids and derivatives	C06337	C8H6O4	-H2O+H	149.023	0.997041	0.97686	0.998473	0.972483
25	25-3	HMDB0032613	3,4-Methylenedioxybenzoic acid	Organoheterocyclic compounds	Benzodioxoles			C8H6O4	-H2O+H	149.023	0.997041	0.97686	0.998473	0.972483
26	26-1	HMDB0060659	1-Methyl-4-nitroimidazole	Organoheterocyclic compounds	Azoles	Imidazoles	C16621	C4H5N3O2	+Na	150.027	0.997106	0.571686	0.991434	0.565148
27	27-1	HMDB0030175	Venoterpine	Organoheterocyclic compounds	Pyridines and derivatives			C9H11NO	+H	150.091	0.996249	0.578581	0.710904	0.409773
28	28-1	HMDB0003647	Perillyl aldehyde	Lipids and lipid-like molecules	Prenol lipids	Monoterpenoids	C02576	C10H14O	+H	151.112	0.997421	0.761647	0.992258	0.753801
28	28-2	HMDB0004487	(S)-Carvone	Lipids and lipid-like molecules	Prenol lipids	Monoterpenoids	C11383	C10H14O	+H	151.112	0.997421	0.761647	0.992258	0.753801
28	28-3	HMDB0029652	2-(4-Methylphenyl)-2-propanol	Benzenoids	Benzene and substituted derivatives	Phenylpropanes		C10H14O	+H	151.112	0.997421	0.761647	0.992258	0.753801
28	28-4	HMDB0031570	2-Methyl-1-phenyl-2-propanol	Benzenoids	Benzene and substituted derivatives	Phenylpropanes		C10H14O	+H	151.112	0.997421	0.761647	0.992258	0.753801
28	28-5	HMDB0031613	4-Phenyl-2-butanol	Benzenoids	Benzene and substituted derivatives			C10H14O	+H	151.112	0.997421	0.761647	0.992258	0.753801
28	28-6	HMDB0031817	Cuminyl alcohol	Lipids and lipid-like molecules	Prenol lipids	Monoterpenoids	C06576	C10H14O	+H	151.112	0.997421	0.761647	0.992258	0.753801
28	28-7	HMDB0032063	4-tert-Butylphenol	Benzenoids	Benzene and substituted derivatives	Phenylpropanes	C14200	C10H14O	+H	151.112	0.997421	0.761647	0.992258	0.753801
28	28-8	HMDB0032213	2-trans-4-trans-7-cis-Decatrienal	Organic oxygen compounds	Organooxygen compounds	Carbonyl compounds		C10H14O	+H	151.112	0.997421	0.761647	0.992258	0.753801
28	28-9	HMDB0032626	1-Methoxy-4-propylbenzene	Benzenoids	Benzene and substituted derivatives	Phenylpropanes		C10H14O	+H	151.112	0.997421	0.761647	0.992258	0.753801
28	28-10	HMDB0034846	2-(4-Methylphenyl)-1-propanol	Lipids and lipid-like molecules	Prenol lipids	Monoterpenoids		C10H14O	+H	151.112	0.997421	0.761647	0.992258	0.753801
28	28-11	HMDB0034921	Teresantalal	Lipids and lipid-like molecules	Prenol lipids	Monoterpenoids		C10H14O	+H	151.112	0.997421	0.761647	0.992258	0.753801
28	28-12	HMDB0035089	(R)-Carvone	Lipids and lipid-like molecules	Prenol lipids	Monoterpenoids	C01767	C10H14O	+H	151.112	0.997421	0.761647	0.992258	0.753801
28	28-13	HMDB0035172	2,6,6-Trimethyl-1,4-cyclohexadiene-1-carboxaldehyde	Organic oxygen compounds	Organic oxides			C10H14O	+H	151.112	0.997421	0.761647	0.992258	0.753801
28	28-14	HMDB0035250	Myrtenal	Lipids and lipid-like molecules	Prenol lipids	Monoterpenoids	C11939	C10H14O	+H	151.112	0.997421	0.761647	0.992258	0.753801
28	28-15	HMDB0035591	3-Caren-5-one	Lipids and lipid-like molecules	Prenol lipids	Monoterpenoids		C10H14O	+H	151.112	0.997421	0.761647	0.992258	0.753801
28	28-16	HMDB0035761	(-)-Pinocarvone	Lipids and lipid-like molecules	Prenol lipids	Monoterpenoids	C09884	C10H14O	+H	151.112	0.997421	0.761647	0.992258	0.753801
28	28-17	HMDB0035770	5-Isopropyl-2-methylphenol	Lipids and lipid-like molecules	Prenol lipids	Monoterpenoids	C09840	C10H14O	+H	151.112	0.997421	0.761647	0.992258	0.753801
28	28-18	HMDB0035824	Carvone	Lipids and lipid-like molecules	Prenol lipids	Monoterpenoids		C10H14O	+H	151.112	0.997421	0.761647	0.992258	0.753801
28	28-19	HMDB0036061	Safranal	Organic oxygen compounds	Organic oxides		C17062	C10H14O	+H	151.112	0.997421	0.761647	0.992258	0.753801
28	28-20	HMDB0036070	1-Acetyl-4-isopropenylcyclopentene	Lipids and lipid-like molecules	Prenol lipids	Monoterpenoids		C10H14O	+H	151.112	0.997421	0.761647	0.992258	0.753801
28	28-21	HMDB0036089	(R)-Menthofuran	Lipids and lipid-like molecules	Prenol lipids	Monoterpenoids	C09868	C10H14O	+H	151.112	0.997421	0.761647	0.992258	0.753801
28	28-22	HMDB0036999	Piperitenone	Lipids and lipid-like molecules	Prenol lipids	Monoterpenoids	C01951	C10H14O	+H	151.112	0.997421	0.761647	0.992258	0.753801
28	28-23	HMDB0037561	Linden ether	Organoheterocyclic compounds	Benzofurans			C10H14O	+H	151.112	0.997421	0.761647	0.992258	0.753801
28	28-24	HMDB0038913	4,6-Decadiyn-1-ol	Lipids and lipid-like molecules	Fatty Acyls	Fatty alcohols		C10H14O	+H	151.112	0.997421	0.761647	0.992258	0.753801
29	29-1	HMDB0029595	Nonane	Hydrocarbons	Saturated hydrocarbons	Alkanes	C02445	C9H20	+Na	151.146	0.997129	0.680057	0.971454	0.658747
29	29-2	HMDB0030301	2,2,3,4-Tetramethylpentane	Hydrocarbons	Saturated hydrocarbons	Alkanes		C9H20	+Na	151.146	0.997129	0.680057	0.971454	0.658747
29	29-3	HMDB0030302	2,3,4-Trimethylhexane	Hydrocarbons	Saturated hydrocarbons	Alkanes		C9H20	+Na	151.146	0.997129	0.680057	0.971454	0.658747
29	29-4	HMDB0031416	3,4-Dimethylheptane	Hydrocarbons	Saturated hydrocarbons	Alkanes		C9H20	+Na	151.146	0.997129	0.680057	0.971454	0.658747
29	29-5	HMDB0031556	Isononane	Hydrocarbons	Saturated hydrocarbons	Alkanes		C9H20	+Na	151.146	0.997129	0.680057	0.971454	0.658747
30	30-1	HMDB0000317	2-Hydroxy-3-methylpentanoic acid	Lipids and lipid-like molecules	Fatty Acyls	Fatty acids and conjugates		C6H12O3	+Na	155.068	0.997726	0.582686	0.988091	0.574438
30	30-2	HMDB0000409	(5R)-5-Hydroxyhexanoic acid	Lipids and lipid-like molecules	Fatty Acyls	Fatty acids and conjugates		C6H12O3	+Na	155.068	0.997726	0.582686	0.988091	0.574438
30	30-3	HMDB0000525	5-Hydroxyhexanoic acid	Lipids and lipid-like molecules	Fatty Acyls	Fatty acids and conjugates		C6H12O3	+Na	155.068	0.997726	0.582686	0.988091	0.574438
30	30-4	HMDB0000624	D-Leucic acid	Lipids and lipid-like molecules	Fatty Acyls	Fatty acids and conjugates	C03264	C6H12O3	+Na	155.068	0.997726	0.582686	0.988091	0.574438
30	30-5	HMDB0000665	Leucinic acid	Lipids and lipid-like molecules	Fatty Acyls	Fatty acids and conjugates		C6H12O3	+Na	155.068	0.997726	0.582686	0.988091	0.574438
30	30-6	HMDB0000746	Hydroxyisocaproic acid	Lipids and lipid-like molecules	Fatty Acyls	Fatty acids and conjugates		C6H12O3	+Na	155.068	0.997726	0.582686	0.988091	0.574438
30	30-7	HMDB0001624	2-Hydroxycaproic acid	Lipids and lipid-like molecules	Fatty Acyls	Fatty acids and conjugates		C6H12O3	+Na	155.068	0.997726	0.582686	0.988091	0.574438
30	30-8	HMDB0001975	2-Ethyl-2-Hydroxybutyric acid	Lipids and lipid-like molecules	Fatty Acyls	Fatty acids and conjugates		C6H12O3	+Na	155.068	0.997726	0.582686	0.988091	0.574438
30	30-9	HMDB0010718	(R)-3-Hydroxyhexanoic acid	Organic acids and derivatives	Hydroxy acids and derivatives	Medium-chain hydroxy acids and derivatives		C6H12O3	+Na	155.068	0.997726	0.582686	0.988091	0.574438
30	30-10	HMDB0012843	6-Hydroxyhexanoic acid	Organic acids and derivatives	Hydroxy acids and derivatives	Medium-chain hydroxy acids and derivatives	C06103	C6H12O3	+Na	155.068	0.997726	0.582686	0.988091	0.574438
30	30-11	HMDB0029166	2-Methyl-3-hydroxyvaleric acid	Lipids and lipid-like molecules	Fatty Acyls	Fatty acids and conjugates		C6H12O3	+Na	155.068	0.997726	0.582686	0.988091	0.574438
30	30-12	HMDB0032158	(+/-)-1-Acetoxy-1-ethoxyethane	Organic acids and derivatives	Carboxylic acids and derivatives	Carboxylic acid derivatives		C6H12O3	+Na	155.068	0.997726	0.582686	0.988091	0.574438
30	30-13	HMDB0032456	Paraldehyde	Organoheterocyclic compounds	Trioxanes		C07834	C6H12O3	+Na	155.068	0.997726	0.582686	0.988091	0.574438
30	30-14	HMDB0033851	4,4-Dimethoxy-2-butanone	Organic oxygen compounds	Organooxygen compounds	Carbonyl compounds		C6H12O3	+Na	155.068	0.997726	0.582686	0.988091	0.574438
30	30-15	HMDB0041844	Butoxyacetic acid	Organic acids and derivatives	Carboxylic acids and derivatives	Carboxylic acids		C6H12O3	+Na	155.068	0.997726	0.582686	0.988091	0.574438
31	31-1	HMDB0004094	Indoxyl	Organoheterocyclic compounds	Indoles and derivatives	Hydroxyindoles	C05658	C8H7NO	+Na	156.042	0.997571	0.691055	0.984935	0.678991
31	31-2	HMDB0029757	4-Hydroxybenzeneacetonitrile	Benzenoids	Benzene and substituted derivatives	Benzyl cyanides	C03766	C8H7NO	+Na	156.042	0.997571	0.691055	0.984935	0.678991
31	31-3	HMDB0032390	2-Methyl-4,5-benzoxazole	Organoheterocyclic compounds	Benzoxazoles			C8H7NO	+Na	156.042	0.997571	0.691055	0.984935	0.678991
32	32-1	HMDB0060173	N-Methylethanolaminium phosphate	Organic acids and derivatives	Organic phosphoric acids and derivatives	Phosphate esters	C01210	C3H10NO4P	+H	156.042	0.997312	0.572609	0.996468	0.569053
33	33-1	HMDB0000883	L-Valine	Organic acids and derivatives	Carboxylic acids and derivatives	Amino acids, peptides, and analogues	C00183	C5H11NO2	+K	156.042	0.997763	0.757715	0.988855	0.747594
33	33-2	HMDB0002141	N-Methyl-a-aminoisobutyric acid	Organic acids and derivatives	Carboxylic acids and derivatives	Amino acids, peptides, and analogues		C5H11NO2	+K	156.042	0.997763	0.757715	0.988855	0.747594
33	33-3	HMDB0003355	5-Aminopentanoic acid	Organic acids and derivatives	Carboxylic acids and derivatives	Amino acids, peptides, and analogues	C00431	C5H11NO2	+K	156.042	0.997763	0.757715	0.988855	0.747594
33	33-4	HMDB0013716	Norvaline	Organic acids and derivatives	Carboxylic acids and derivatives	Amino acids, peptides, and analogues	C01799	C5H11NO2	+K	156.042	0.997763	0.757715	0.988855	0.747594
34	34-1	HMDB0032478	Polypropylene glycol (m w 1,200-3,000)	Organic oxygen compounds	Organooxygen compounds	Alcohols and polyols		C6H14O3	+Na	157.084	0.99878	0.816736	0.995926	0.812416
35	35-1	HMDB0031101	8-Hydroxy-5,6-octadienoic acid	Organic acids and derivatives	Hydroxy acids and derivatives	Medium-chain hydroxy acids and derivatives		C8H12O3	+H	157.086	0.998941	0.802117	0.987438	0.791202
35	35-2	HMDB0032232	2,5-Dimethyl-4-ethoxy-3(2H)-furanone	Organoheterocyclic compounds	Dihydrofurans	Furanones		C8H12O3	+H	157.086	0.998941	0.802117	0.987438	0.791202
36	36-1	HMDB0000991	DL-2-Aminooctanoic acid	Organic acids and derivatives	Carboxylic acids and derivatives	Amino acids, peptides, and analogues		C8H17NO2	+H	160.133	0.997789	0.823857	0.992969	0.816256
37	37-1	HMDB0033789	2-O-Methyl-L-fucose	Organic oxygen compounds	Organooxygen compounds	Carbohydrates and carbohydrate conjugates		C7H14O5	-H2O+H	161.081	0.996694	0.547643	0.979794	0.534803
38	38-1	HMDB0062626	Phenylethanolaminium	Organic nitrogen compounds	Organonitrogen compounds	Amines		C8H12NO	+Na	161.081	0.996734	0.549314	0.982466	0.537919
39	39-1	HMDB0000062	L-Carnitine	Organic nitrogen compounds	Organonitrogen compounds	Quaternary ammonium salts	C00318	C7H15NO3	+H	162.112	0.99787	0.967027	0.998066	0.963101
40	40-1	HMDB0060344	2-Bromoacetaldehyde	Organohalogen compounds	Organobromides		C14870	C2H3BrO	+K	162.898	0.996426	0.65912	0.752021	0.493901
41	41-1	HMDB0014023	para-Trifluoromethylphenol	Benzenoids	Benzene and substituted derivatives	Trifluoromethylbenzenes		C7H5F3O	+H	163.037	0.997776	0.66164	0.979902	0.6469
42	42-1	HMDB0031735	Ethyl maltol	Organoheterocyclic compounds	Pyrans	Pyranones and derivatives	C20362	C7H8O3	+Na	163.037	0.997058	0.626139	0.977832	0.610458
43	43-1	HMDB0002149	3 Hydroxycoumarin	Phenylpropanoids and polyketides	Coumarins and derivatives	Hydroxycoumarins		C9H6O3	+H	163.039	0.997169	0.821906	0.996757	0.816921
43	43-2	HMDB0029865	Umbelliferone	Phenylpropanoids and polyketides	Coumarins and derivatives	Hydroxycoumarins	C09315	C9H6O3	+H	163.039	0.997169	0.821906	0.996757	0.816921
44	44-1	HMDB0032380	(S1)-Methoxy-3-heptanethiol	Organic oxygen compounds	Organooxygen compounds	Ethers		C8H18OS	+H	163.115	0.998452	0.512535	0.925035	0.473379
45	45-1	HMDB0062634	(S)-carnitinium	Organic nitrogen compounds	Organonitrogen compounds	Quaternary ammonium salts		C7H16NO3	+H	163.12	0.998602	0.661064	0.926007	0.611294
46	46-1	HMDB0001934	Nicotine	Organoheterocyclic compounds	Pyridines and derivatives	Pyrrolidinylpyridines	C00745	C10H14N2	+H	163.123	0.998646	0.773401	0.994083	0.767783
46	46-2	HMDB0004350	Anabasine	Alkaloids and derivatives			C06180	C10H14N2	+H	163.123	0.998646	0.773401	0.994083	0.767783
46	46-3	HMDB0039982	Trimethyl-2-propenylpyrazine	Organoheterocyclic compounds	Diazines	Pyrazines		C10H14N2	+H	163.123	0.998646	0.773401	0.994083	0.767783
47	47-1	HMDB0033625	(3R,7R)-1,3,7-Octanetriol	Lipids and lipid-like molecules	Fatty Acyls	Fatty alcohols		C8H18O3	+H	163.133	0.997485	0.754283	0.994378	0.748156
48	48-1	HMDB0000251	Taurine	Organic acids and derivatives	Organic sulfonic acids and derivatives	Organosulfonic acids and derivatives	C00245	C2H7NO3S	+K	163.978	0.9976	0.520785	0.981035	0.509682
49	49-1	HMDB0029359	(R)-1,3-Octanediol	Lipids and lipid-like molecules	Fatty Acyls	Fatty alcohols		C8H18O2	+Na	169.12	0.997212	0.609602	0.989849	0.601732
50	50-1	HMDB0010724	3-Oxodecanoic acid	Organic acids and derivatives	Keto acids and derivatives	Medium-chain keto acids and derivatives		C10H18O3	-H2O+H	169.122	0.997272	0.648428	0.990654	0.640615
50	50-2	HMDB0030367	Ethyl (3R,5Z)-3-hydroxy-5-octenoate	Lipids and lipid-like molecules	Fatty Acyls	Fatty alcohols		C10H18O3	-H2O+H	169.122	0.997272	0.648428	0.990654	0.640615
50	50-3	HMDB0030369	3-Hydroxy-5Z-octenyl acetate	Lipids and lipid-like molecules	Fatty Acyls	Fatty alcohol esters		C10H18O3	-H2O+H	169.122	0.997272	0.648428	0.990654	0.640615
50	50-4	HMDB0038692	6-Methyl-2-methylene-6-octene-1,3,8-triol	Lipids and lipid-like molecules	Fatty Acyls	Fatty alcohols		C10H18O3	-H2O+H	169.122	0.997272	0.648428	0.990654	0.640615
50	50-5	HMDB0038978	(1beta,2beta,5beta)-p-Menth-3-ene-1,2,5-triol	Lipids and lipid-like molecules	Prenol lipids	Monoterpenoids		C10H18O3	-H2O+H	169.122	0.997272	0.648428	0.990654	0.640615
50	50-6	HMDB0041545	(1R,2R,4R)-1,8-Epoxy-p-menthane-2,4-diol	Lipids and lipid-like molecules	Prenol lipids	Monoterpenoids		C10H18O3	-H2O+H	169.122	0.997272	0.648428	0.990654	0.640615
51	51-1	HMDB0000064	Creatine	Organic acids and derivatives	Carboxylic acids and derivatives	Amino acids, peptides, and analogues	C00300	C4H9N3O2	+K	170.033	0.998032	0.581381	0.97793	0.567431
51	51-2	HMDB0013222	Beta-Guanidinopropionic acid	Organic nitrogen compounds	Organonitrogen compounds	Guanidines	C03065	C4H9N3O2	+K	170.033	0.998032	0.581381	0.97793	0.567431
52	52-1	HMDB0004816	FAPy-adenine	Organoheterocyclic compounds	Diazines	Pyrimidines and pyrimidine derivatives	C06502	C5H7N5O	+NH4	171.099	0.998789	0.57428	0.990977	0.568408
53	53-1	HMDB0030471	1,4-Ipomeadiol	Organoheterocyclic compounds	Heteroaromatic compounds			C9H14O3	+H	171.102	0.99876	0.562915	0.982646	0.55246
54	54-1	HMDB0000451	cis-4-Hydroxycyclohexylacetic acid	Organic oxygen compounds	Organooxygen compounds	Alcohols and polyols		C8H14O3	+NH4	176.128	0.997287	0.600919	0.983457	0.589375
54	54-2	HMDB0000909	trans-4-Hydroxycyclohexylacetic acid	Organic oxygen compounds	Organooxygen compounds	Alcohols and polyols		C8H14O3	+NH4	176.128	0.997287	0.600919	0.983457	0.589375
54	54-3	HMDB0060683	2-n-Propyl-4-oxopentanoic acid	Organic acids and derivatives	Keto acids and derivatives	Gamma-keto acids and derivatives	C16655	C8H14O3	+NH4	176.128	0.997287	0.600919	0.983457	0.589375
55	55-1	HMDB0000555	3-Methyladipic acid	Lipids and lipid-like molecules	Fatty Acyls	Fatty acids and conjugates		C7H12O4	+Na	183.063	0.998231	0.55791	0.988779	0.550675
55	55-2	HMDB0000857	Pimelic acid	Lipids and lipid-like molecules	Fatty Acyls	Fatty acids and conjugates	C02656	C7H12O4	+Na	183.063	0.998231	0.55791	0.988779	0.550675
55	55-3	HMDB0002441	3,3-Dimethylglutaric acid	Lipids and lipid-like molecules	Fatty Acyls	Fatty acids and conjugates		C7H12O4	+Na	183.063	0.998231	0.55791	0.988779	0.550675
55	55-4	HMDB0029167	2-Methyladipic acid	Lipids and lipid-like molecules	Fatty Acyls	Fatty acids and conjugates		C7H12O4	+Na	183.063	0.998231	0.55791	0.988779	0.550675
55	55-5	HMDB0029573	Diethyl malonate	Organic acids and derivatives	Carboxylic acids and derivatives	Dicarboxylic acids and derivatives		C7H12O4	+Na	183.063	0.998231	0.55791	0.988779	0.550675
55	55-6	HMDB0059722	Mono-methyl-adipate	Lipids and lipid-like molecules	Fatty Acyls	Fatty acids and conjugates		C7H12O4	+Na	183.063	0.998231	0.55791	0.988779	0.550675
55	55-7	HMDB0059738	2-Ethylglutaric acid	Lipids and lipid-like molecules	Fatty Acyls	Fatty acids and conjugates		C7H12O4	+Na	183.063	0.998231	0.55791	0.988779	0.550675
55	55-8	HMDB0059893	Ethyl methyl_succinate	Lipids and lipid-like molecules	Fatty Acyls	Fatty acid esters		C7H12O4	+Na	183.063	0.998231	0.55791	0.988779	0.550675
55	55-9	HMDB0061676	2,2-Dimethylglutaric acid	Lipids and lipid-like molecules	Fatty Acyls	Fatty acids and conjugates		C7H12O4	+Na	183.063	0.998231	0.55791	0.988779	0.550675
56	56-1	HMDB0000819	Normetanephrine	Benzenoids	Phenols	Methoxyphenols	C05589	C9H13NO3	+H	184.097	0.997715	0.809668	0.988454	0.79849
57	57-1	HMDB0001010	Nicotine imine	Alkaloids and derivatives				C10H13N2	+Na	184.097	0.997947	0.793955	0.987866	0.78271
58	58-1	HMDB0061890	Pyroglutamylglycine	Organic acids and derivatives	Carboxylic acids and derivatives	Amino acids, peptides, and analogues		C7H10N2O4	+H	187.071	0.998237	0.536518	0.996412	0.533651
59	59-1	HMDB0001955	3-Phenylbutyric acid	Phenylpropanoids and polyketides	Phenylpropanoic acids			C10H12O2	+Na	187.073	0.998348	0.622861	0.99039	0.615856
60	60-1	HMDB0032708	1-Naphthaleneacetic acid	Benzenoids	Naphthalenes		C13014	C12H10O2	+H	187.075	0.998322	0.540801	0.985417	0.532021
61	61-1	HMDB0030941	Undecanal	Organic oxygen compounds	Organooxygen compounds	Carbonyl compounds		C11H22O	+NH4	188.201	0.994026	0.933919	0.987461	0.916699
62	62-1	HMDB0001370	Diaminopimelic acid	Organic acids and derivatives	Carboxylic acids and derivatives	Amino acids, peptides, and analogues	C00666	C7H14N2O4	+H	191.103	0.998586	0.605607	0.992268	0.600075
62	62-2	HMDB0028697	Alanylthreonine	Organic acids and derivatives	Carboxylic acids and derivatives	Amino acids, peptides, and analogues		C7H14N2O4	+H	191.103	0.998586	0.605607	0.992268	0.600075
63	63-1	HMDB0015519	Phendimetrazine	Organoheterocyclic compounds	Oxazinanes	Morpholines	C07904	C12H17NO	+H	192.138	0.995576	0.56197	0.91607	0.512526
63	63-2	HMDB0032635	N,N-Diethylbenzeneacetamide	Benzenoids	Benzene and substituted derivatives	Phenylacetamides	C10938	C12H17NO	+H	192.138	0.995576	0.56197	0.91607	0.512526
63	63-3	HMDB0032854	N-Acetyl-2,6-diethylaniline	Benzenoids	Benzene and substituted derivatives	Anilides		C12H17NO	+H	192.138	0.995576	0.56197	0.91607	0.512526
64	64-1	HMDB0000529	5Z-Dodecenoic acid	Lipids and lipid-like molecules	Fatty Acyls	Fatty acids and conjugates		C12H22O2	+H	199.169	0.997666	0.85583	0.995101	0.84965
64	64-2	HMDB0010729	trans-Dodec-2-enoic acid	Lipids and lipid-like molecules	Fatty Acyls	Fatty acids and conjugates		C12H22O2	+H	199.169	0.997666	0.85583	0.995101	0.84965
64	64-3	HMDB0029585	Methyl 10-undecenoate	Lipids and lipid-like molecules	Fatty Acyls	Fatty acid esters		C12H22O2	+H	199.169	0.997666	0.85583	0.995101	0.84965
64	64-4	HMDB0029763	Allyl nonanoate	Lipids and lipid-like molecules	Fatty Acyls	Fatty acid esters		C12H22O2	+H	199.169	0.997666	0.85583	0.995101	0.84965
64	64-5	HMDB0031683	xi-Dihydro-5-octyl-2(3H)-furanone	Organoheterocyclic compounds	Lactones	Gamma butyrolactones		C12H22O2	+H	199.169	0.997666	0.85583	0.995101	0.84965
64	64-6	HMDB0032214	cis-4-Decenyl acetate	Lipids and lipid-like molecules	Fatty Acyls	Fatty alcohol esters		C12H22O2	+H	199.169	0.997666	0.85583	0.995101	0.84965
64	64-7	HMDB0032235	2,6-Dimethyl-5-heptenal propyleneglycol acetal	Organoheterocyclic compounds	Dioxolanes	1,3-dioxolanes		C12H22O2	+H	199.169	0.997666	0.85583	0.995101	0.84965
64	64-8	HMDB0032248	11-Dodecenoic acid	Lipids and lipid-like molecules	Fatty Acyls	Fatty acids and conjugates		C12H22O2	+H	199.169	0.997666	0.85583	0.995101	0.84965
64	64-9	HMDB0033378	cis-3-Hexenyl hexanoate	Lipids and lipid-like molecules	Fatty Acyls	Fatty acid esters		C12H22O2	+H	199.169	0.997666	0.85583	0.995101	0.84965
64	64-10	HMDB0034160	(±)-Citronellyl acetate	Lipids and lipid-like molecules	Fatty Acyls	Fatty alcohol esters	C12298	C12H22O2	+H	199.169	0.997666	0.85583	0.995101	0.84965
64	64-11	HMDB0034844	Citronellyl acetate	Lipids and lipid-like molecules	Fatty Acyls	Fatty alcohol esters		C12H22O2	+H	199.169	0.997666	0.85583	0.995101	0.84965
64	64-12	HMDB0037186	Rhodinyl acetate	Lipids and lipid-like molecules	Fatty Acyls	Fatty alcohol esters		C12H22O2	+H	199.169	0.997666	0.85583	0.995101	0.84965
64	64-13	HMDB0037305	Methyl 9-undecenoate	Lipids and lipid-like molecules	Fatty Acyls	Fatty acid esters		C12H22O2	+H	199.169	0.997666	0.85583	0.995101	0.84965
64	64-14	HMDB0037329	Ethyl 2-decenoate	Lipids and lipid-like molecules	Fatty Acyls	Fatty acid esters		C12H22O2	+H	199.169	0.997666	0.85583	0.995101	0.84965
64	64-15	HMDB0037498	1-Ethenylhexyl butanoate	Lipids and lipid-like molecules	Fatty Acyls	Fatty acid esters		C12H22O2	+H	199.169	0.997666	0.85583	0.995101	0.84965
64	64-16	HMDB0037742	xi-5-Dodecanolide	Organoheterocyclic compounds	Lactones	Delta valerolactones		C12H22O2	+H	199.169	0.997666	0.85583	0.995101	0.84965
64	64-17	HMDB0038081	2-Octenyl butyrate	Lipids and lipid-like molecules	Fatty Acyls	Fatty alcohol esters		C12H22O2	+H	199.169	0.997666	0.85583	0.995101	0.84965
64	64-18	HMDB0038269	Hexyl 2E-hexenoate	Lipids and lipid-like molecules	Fatty Acyls	Fatty acid esters		C12H22O2	+H	199.169	0.997666	0.85583	0.995101	0.84965
64	64-19	HMDB0038924	2-Hexenyl hexanoate	Lipids and lipid-like molecules	Fatty Acyls	Fatty acid esters		C12H22O2	+H	199.169	0.997666	0.85583	0.995101	0.84965
64	64-20	HMDB0039220	Ethyl 4-decenoate	Lipids and lipid-like molecules	Fatty Acyls	Fatty acid esters		C12H22O2	+H	199.169	0.997666	0.85583	0.995101	0.84965
64	64-21	HMDB0040158	Hexyl 2-methyl-3-pentenoate	Lipids and lipid-like molecules	Fatty Acyls	Fatty acid esters		C12H22O2	+H	199.169	0.997666	0.85583	0.995101	0.84965
64	64-22	HMDB0040163	Hexyl 2-methyl-4-pentenoate	Lipids and lipid-like molecules	Fatty Acyls	Fatty acid esters		C12H22O2	+H	199.169	0.997666	0.85583	0.995101	0.84965
64	64-23	HMDB0040361	1,1-Dimethoxy-3,7-dimethyl-2,6-octadiene	Lipids and lipid-like molecules	Prenol lipids	Monoterpenoids		C12H22O2	+H	199.169	0.997666	0.85583	0.995101	0.84965
64	64-24	HMDB0041449	[(3,7-Dimethyl-6-octenyl)oxy]acetaldehyde	Lipids and lipid-like molecules	Prenol lipids	Monoterpenoids		C12H22O2	+H	199.169	0.997666	0.85583	0.995101	0.84965
65	65-1	HMDB0030376	(S)-Isowillardiine	Organic acids and derivatives	Carboxylic acids and derivatives	Amino acids, peptides, and analogues	C08289	C7H9N3O4	+H	200.067	0.997618	0.727813	0.994254	0.721907
66	66-1	HMDB0001855	5-Hydroxytryptophol	Organoheterocyclic compounds	Indoles and derivatives	Hydroxyindoles		C10H11NO2	+Na	200.068	0.997572	0.766417	0.992193	0.758588
67	67-1	HMDB0006248	gamma-Glutamylalanine	Organic acids and derivatives	Carboxylic acids and derivatives	Amino acids, peptides, and analogues	C03740	C8H14N2O5	-H2O+H	201.087	0.998209	0.619954	0.994137	0.615216
68	68-1	HMDB0031250	Phenylmethyl 2-methylpropanoate	Benzenoids	Benzene and substituted derivatives	Benzyloxycarbonyls		C11H14O2	+Na	201.089	0.998305	0.681609	0.979553	0.666541
68	68-2	HMDB0031864	Methyleugenol	Benzenoids	Benzene and substituted derivatives	Methoxybenzenes	C10454	C11H14O2	+Na	201.089	0.998305	0.681609	0.979553	0.666541
68	68-3	HMDB0035013	2-Phenylethyl propanoate	Benzenoids	Benzene and substituted derivatives			C11H14O2	+Na	201.089	0.998305	0.681609	0.979553	0.666541
68	68-4	HMDB0036385	Methyl 4-phenylbutanoate	Lipids and lipid-like molecules	Fatty Acyls	Fatty acid esters		C11H14O2	+Na	201.089	0.998305	0.681609	0.979553	0.666541
68	68-5	HMDB0038179	3-(2-Hydroxy-4-methylphenyl)-2-butanone	Lipids and lipid-like molecules	Prenol lipids	Monoterpenoids		C11H14O2	+Na	201.089	0.998305	0.681609	0.979553	0.666541
68	68-6	HMDB0040411	Ethyl 3-phenylpropanoate	Lipids and lipid-like molecules	Fatty Acyls	Fatty acid esters		C11H14O2	+Na	201.089	0.998305	0.681609	0.979553	0.666541
69	69-1	HMDB0030646	(Z)-3-(1-Butenyl)-1H-2-benzopyran-1-one	Phenylpropanoids and polyketides	Isocoumarins and derivatives			C13H12O2	+H	201.091	0.998102	0.618747	0.972946	0.600865
69	69-2	HMDB0036460	Safynol	Lipids and lipid-like molecules	Fatty Acyls	Fatty alcohols	C08458	C13H12O2	+H	201.091	0.998102	0.618747	0.972946	0.600865
70	70-1	HMDB0041608	Methional diethyl acetal	Organic oxygen compounds	Organooxygen compounds	Ethers		C8H18O2S	+Na	201.092	0.99812	0.586478	0.912938	0.534412
71	71-1	HMDB0001256	Spermine	Organic nitrogen compounds	Organonitrogen compounds	Amines	C00750	C10H26N4	+H	203.223	0.997471	0.618458	0.982399	0.606036
72	72-1	HMDB0094663	1H-Indole, 3-methyl-1- (trimethylsilyl)-	Organoheterocyclic compounds	Indoles and derivatives	Indoles		C12H17NSi	+H	204.12	0.997828	0.621032	0.974597	0.603941
73	73-1	HMDB0000201	L-Acetylcarnitine	Lipids and lipid-like molecules	Fatty Acyls	Fatty acid esters	C02571	C9H17NO4	+H	204.123	0.997822	0.918454	0.991243	0.908428
74	74-1	HMDB0012215	Dihydrozeatin	Organoheterocyclic compounds	Imidazopyrimidines	Purines and purine derivatives	C02029	C10H15N5O	-H2O+H	204.124	0.99773	0.855535	0.990737	0.845687
75	75-1	HMDB0011162	L-beta-aspartyl-L-alanine	Organic acids and derivatives	Peptidomimetics	Hybrid peptides		C7H12N2O5	+H	205.082	0.997324	0.596163	0.993783	0.590871
75	75-2	HMDB0011667	gamma-Glutamylglycine	Organic acids and derivatives	Carboxylic acids and derivatives	Amino acids, peptides, and analogues		C7H12N2O5	+H	205.082	0.997324	0.596163	0.993783	0.590871
76	76-1	HMDB0029456	Amyl 2-furoate	Organoheterocyclic compounds	Furans	Furoic acid and derivatives		C10H14O3	+Na	205.084	0.997087	0.786218	0.994927	0.779951
76	76-2	HMDB0037727	Furfuryl pentanoate	Lipids and lipid-like molecules	Fatty Acyls	Fatty acid esters		C10H14O3	+Na	205.084	0.997087	0.786218	0.994927	0.779951
76	76-3	HMDB0039874	Furfuryl isovalerate	Lipids and lipid-like molecules	Fatty Acyls	Fatty acid esters		C10H14O3	+Na	205.084	0.997087	0.786218	0.994927	0.779951
77	77-1	HMDB0035095	7-Ethoxy-4-methyl-2H-1-benzopyran-2-one	Phenylpropanoids and polyketides	Coumarins and derivatives			C12H12O3	+H	205.086	0.997008	0.951838	0.997867	0.946966
78	78-1	HMDB0015145	Edrophonium	Benzenoids	Benzene and substituted derivatives	Aniline and substituted anilines	C06976	C10H16NO	+K	205.086	0.997012	0.560344	0.975553	0.545012
79	79-1	HMDB0000732	Hydroxykynurenine	Organic oxygen compounds	Organooxygen compounds	Carbonyl compounds	C02794	C10H12N2O4	-H2O+H	207.076	0.998394	0.629038	0.976376	0.613191
79	79-2	HMDB0011631	L-3-Hydroxykynurenine	Organic oxygen compounds	Organooxygen compounds	Carbonyl compounds	C03227	C10H12N2O4	-H2O+H	207.076	0.998394	0.629038	0.976376	0.613191
79	79-3	HMDB0012819	5-Hydroxykynurenine	Organic oxygen compounds	Organooxygen compounds	Carbonyl compounds	C05651	C10H12N2O4	-H2O+H	207.076	0.998394	0.629038	0.976376	0.613191
79	79-4	HMDB0014787	Stavudine	Nucleosides, nucleotides, and analogues	Nucleoside and nucleotide analogues		C07312	C10H12N2O4	-H2O+H	207.076	0.998394	0.629038	0.976376	0.613191
79	79-5	HMDB0029397	L-Nicotianine	Organic acids and derivatives	Carboxylic acids and derivatives	Amino acids, peptides, and analogues		C10H12N2O4	-H2O+H	207.076	0.998394	0.629038	0.976376	0.613191
80	80-1	HMDB0028847	Glycyl-Methionine	Organic acids and derivatives	Carboxylic acids and derivatives	Amino acids, peptides, and analogues		C7H14N2O3S	+H	207.08	0.998358	0.581056	0.980209	0.568621
80	80-2	HMDB0028973	Methionyl-Glycine	Organic acids and derivatives	Carboxylic acids and derivatives	Amino acids, peptides, and analogues		C7H14N2O3S	+H	207.08	0.998358	0.581056	0.980209	0.568621
81	81-1	HMDB0032584	4-Hydroxychalcone	Phenylpropanoids and polyketides	Linear 1,3-diarylpropanoids	Chalcones and dihydrochalcones	C14231	C15H12O2	-H2O+H	207.08	0.998609	0.56225	0.96676	0.542805
82	82-1	HMDB0033567	Cyclotetradecane	Hydrocarbons	Saturated hydrocarbons	Cycloalkanes		C14H28	+NH4	214.253	0.996517	0.738616	0.964715	0.710072
82	82-2	HMDB0061833	(E)-7-Tetradecene	Hydrocarbons	Unsaturated hydrocarbons	Unsaturated aliphatic hydrocarbons		C14H28	+NH4	214.253	0.996517	0.738616	0.964715	0.710072
82	82-3	HMDB0061834	1-Tetradecene	Hydrocarbons	Unsaturated hydrocarbons	Unsaturated aliphatic hydrocarbons		C14H28	+NH4	214.253	0.996517	0.738616	0.964715	0.710072
83	83-1	HMDB0000954	Ferulic acid	Phenylpropanoids and polyketides	Cinnamic acids and derivatives	Hydroxycinnamic acids and derivatives	C01494	C10H10O4	+Na	217.047	0.998614	0.543569	0.993483	0.539278
83	83-2	HMDB0029663	Vanillin acetate	Benzenoids	Phenol esters			C10H10O4	+Na	217.047	0.998614	0.543569	0.993483	0.539278
83	83-3	HMDB0030765	(-)-trans-3,4-Dihydro-4,8-dihydroxy-3-methyl-1H-2-benzopyran-1-one	Organoheterocyclic compounds	Benzopyrans	2-benzopyrans		C10H10O4	+Na	217.047	0.998614	0.543569	0.993483	0.539278
83	83-4	HMDB0032614	Piperonyl acetate	Organoheterocyclic compounds	Benzodioxoles			C10H10O4	+Na	217.047	0.998614	0.543569	0.993483	0.539278
83	83-5	HMDB0032652	Meconine	Organoheterocyclic compounds	Isocoumarans	Isobenzofuranones		C10H10O4	+Na	217.047	0.998614	0.543569	0.993483	0.539278
84	84-1	HMDB0094708	Tetraethylene glycol	Organic oxygen compounds	Organooxygen compounds	Ethers		C8H18O5	+Na	217.105	0.997473	0.554073	0.991777	0.548128
85	85-1	HMDB0000638	Dodecanoic acid	Lipids and lipid-like molecules	Fatty Acyls	Fatty acids and conjugates	C02679	C12H24O2	+NH4	218.211	0.997448	0.514625	0.981966	0.504054
86	86-1	HMDB0000565	Galactonic acid	Organic acids and derivatives	Hydroxy acids and derivatives	Medium-chain hydroxy acids and derivatives	C00880	C6H12O7	+Na	219.048	0.997089	0.569284	0.993705	0.564053
86	86-2	HMDB0000625	Gluconic acid	Organic oxygen compounds	Organooxygen compounds	Carbohydrates and carbohydrate conjugates	C00257	C6H12O7	+Na	219.048	0.997089	0.569284	0.993705	0.564053
86	86-3	HMDB0003290	Gulonic acid	Organic acids and derivatives	Hydroxy acids and derivatives	Medium-chain hydroxy acids and derivatives	C00800	C6H12O7	+Na	219.048	0.997089	0.569284	0.993705	0.564053
87	87-1	HMDB0001857	1,3-Dimethyluric acid	Organoheterocyclic compounds	Imidazopyrimidines	Purines and purine derivatives		C7H8N4O3	+Na	219.049	0.997053	0.53617	0.993551	0.531142
87	87-2	HMDB0001982	3,7-Dimethyluric acid	Organoheterocyclic compounds	Imidazopyrimidines	Purines and purine derivatives	C16360	C7H8N4O3	+Na	219.049	0.997053	0.53617	0.993551	0.531142
87	87-3	HMDB0002026	1,9-Dimethyluric acid	Organoheterocyclic compounds	Imidazopyrimidines	Purines and purine derivatives		C7H8N4O3	+Na	219.049	0.997053	0.53617	0.993551	0.531142
87	87-4	HMDB0004308	7,9-Dimethyluric acid	Organoheterocyclic compounds	Imidazopyrimidines	Purines and purine derivatives		C7H8N4O3	+Na	219.049	0.997053	0.53617	0.993551	0.531142
87	87-5	HMDB0011103	1,7-Dimethyluric acid	Organoheterocyclic compounds	Imidazopyrimidines	Purines and purine derivatives	C16356	C7H8N4O3	+Na	219.049	0.997053	0.53617	0.993551	0.531142
88	88-1	HMDB0029834	Harmalan	Alkaloids and derivatives	Harmala alkaloids			C12H12N2	+K	223.063	0.997168	0.554289	0.958118	0.52957
89	89-1	HMDB0000603	cis-4-Decenedioic acid	Lipids and lipid-like molecules	Fatty Acyls	Fatty acids and conjugates		C10H16O4	+Na	223.094	0.997972	0.50891	0.983617	0.499557
89	89-2	HMDB0013227	cis-5-Decenedioic acid	Lipids and lipid-like molecules	Fatty Acyls	Fatty acids and conjugates		C10H16O4	+Na	223.094	0.997972	0.50891	0.983617	0.499557
89	89-3	HMDB0030989	5-Pentyltetrahydro-2-oxo-3-furancarboxylic acid	Organoheterocyclic compounds	Lactones	Gamma butyrolactones		C10H16O4	+Na	223.094	0.997972	0.50891	0.983617	0.499557
89	89-4	HMDB0030990	alpha-Carboxy-delta-nonalactone	Organoheterocyclic compounds	Lactones	Delta valerolactones		C10H16O4	+Na	223.094	0.997972	0.50891	0.983617	0.499557
89	89-5	HMDB0034491	(±)-Camphoric acid	Organic acids and derivatives	Carboxylic acids and derivatives	Dicarboxylic acids and derivatives		C10H16O4	+Na	223.094	0.997972	0.50891	0.983617	0.499557
89	89-6	HMDB0034971	(1R,2R,3S,1'R)-Nepetalinic acid	Lipids and lipid-like molecules	Prenol lipids	Monoterpenoids		C10H16O4	+Na	223.094	0.997972	0.50891	0.983617	0.499557
90	90-1	HMDB0060606	Hydralazine acetone hydrazone	Organoheterocyclic compounds	Diazanaphthalenes	Benzodiazines		C11H12N4	+Na	223.095	0.99754	0.652882	0.989771	0.644614
91	91-1	HMDB0030254	3-(3,4,5-Trimethoxyphenyl)propanoic acid	Phenylpropanoids and polyketides	Phenylpropanoic acids			C12H16O5	-H2O+H	223.096	0.996951	0.69558	0.926151	0.642247
92	92-1	HMDB0001186	N1-Acetylspermine	Organic acids and derivatives	Carboxylic acids and derivatives	Carboxylic acid derivatives	C02567	C12H28N4O	-H2O+H	227.223	0.997262	0.728487	0.987993	0.71777
93	93-1	HMDB0028681	Alanylarginine	Organic acids and derivatives	Carboxylic acids and derivatives	Amino acids, peptides, and analogues		C9H19N5O3	-H2O+H	228.146	0.997234	0.600714	0.779582	0.467011
93	93-2	HMDB0028702	Arginylalanine	Organic acids and derivatives	Carboxylic acids and derivatives	Amino acids, peptides, and analogues		C9H19N5O3	-H2O+H	228.146	0.997234	0.600714	0.779582	0.467011
94	94-1	HMDB0015656	Naphazoline	Benzenoids	Naphthalenes			C14H14N2	+NH4	228.15	0.997189	0.741184	0.993226	0.734094
95	95-1	HMDB0000387	3-Hydroxydodecanoic acid	Organic acids and derivatives	Hydroxy acids and derivatives	Medium-chain hydroxy acids and derivatives		C12H24O3	+Na	239.162	0.99887	0.925865	0.994245	0.919496
95	95-2	HMDB0002059	12-Hydroxydodecanoic acid	Organic acids and derivatives	Hydroxy acids and derivatives	Medium-chain hydroxy acids and derivatives	C08317	C12H24O3	+Na	239.162	0.99887	0.925865	0.994245	0.919496
95	95-3	HMDB0010728	(R)-3-Hydroxydodecanoic acid	Organic acids and derivatives	Hydroxy acids and derivatives	Medium-chain hydroxy acids and derivatives		C12H24O3	+Na	239.162	0.99887	0.925865	0.994245	0.919496
95	95-4	HMDB0040169	xi-5-Hydroxydodecanoic acid	Lipids and lipid-like molecules	Fatty Acyls	Fatty acids and conjugates		C12H24O3	+Na	239.162	0.99887	0.925865	0.994245	0.919496
96	96-1	HMDB0038256	Geranyl acetoacetate	Lipids and lipid-like molecules	Fatty Acyls	Fatty alcohol esters		C14H22O3	+H	239.164	0.998763	0.767927	0.979092	0.750942
97	97-1	HMDB0034181	3-Methylcyclopentadecanone	Organic oxygen compounds	Organooxygen compounds	Carbonyl compounds		C16H30O	+H	239.237	0.996555	0.797832	0.981108	0.780063
97	97-2	HMDB0037544	(±)-2-Dodecylcyclobutanone	Organic oxygen compounds	Organooxygen compounds	Carbonyl compounds		C16H30O	+H	239.237	0.996555	0.797832	0.981108	0.780063
97	97-3	HMDB0060482	Hexadecenal	Lipids and lipid-like molecules	Fatty Acyls	Fatty aldehydes	C06123	C16H30O	+H	239.237	0.996555	0.797832	0.981108	0.780063
98	98-1	HMDB0030516	Petasinine	Organoheterocyclic compounds	Pyrrolizidines			C13H21NO3	+H	240.159	0.99866	0.569179	0.846902	0.481393
99	99-1	HMDB0011150	Deoxyhypusine	Organic acids and derivatives	Carboxylic acids and derivatives	Amino acids, peptides, and analogues		C10H23N3O2	+Na	240.168	0.998961	0.672644	0.958381	0.643979
99	99-2	HMDB0060066	Spermic acid 1	Organic acids and derivatives	Carboxylic acids and derivatives	Amino acids, peptides, and analogues		C10H23N3O2	+Na	240.168	0.998961	0.672644	0.958381	0.643979
100	100-1	HMDB0015407	Pirbuterol	Organoheterocyclic compounds	Pyridines and derivatives	Hydroxypyridines	C07807	C12H20N2O3	+H	241.155	0.995161	0.66243	0.974948	0.64271
101	101-1	HMDB0013687	Nookatone	Lipids and lipid-like molecules	Prenol lipids	Sesquiterpenoids		C15H22O	+Na	241.156	0.995057	0.65405	0.954543	0.621233
101	101-2	HMDB0035081	(5alpha,10alpha)-3,7(11)-Eudesmadien-2-one	Lipids and lipid-like molecules	Prenol lipids	Sesquiterpenoids		C15H22O	+Na	241.156	0.995057	0.65405	0.954543	0.621233
101	101-3	HMDB0035082	(5beta,7beta,10beta)-3,11-Eudesmadien-2-one	Lipids and lipid-like molecules	Prenol lipids	Sesquiterpenoids		C15H22O	+Na	241.156	0.995057	0.65405	0.954543	0.621233
101	101-4	HMDB0035643	beta-Sinensal	Lipids and lipid-like molecules	Prenol lipids	Sesquiterpenoids	C09730	C15H22O	+Na	241.156	0.995057	0.65405	0.954543	0.621233
101	101-5	HMDB0035657	Solavetivone	Lipids and lipid-like molecules	Prenol lipids	Sesquiterpenoids		C15H22O	+Na	241.156	0.995057	0.65405	0.954543	0.621233
101	101-6	HMDB0035747	Patchoulenone	Lipids and lipid-like molecules	Prenol lipids	Sesquiterpenoids		C15H22O	+Na	241.156	0.995057	0.65405	0.954543	0.621233
101	101-7	HMDB0035786	Valerenal	Lipids and lipid-like molecules	Prenol lipids	Sesquiterpenoids		C15H22O	+Na	241.156	0.995057	0.65405	0.954543	0.621233
101	101-8	HMDB0035835	Furanoeremophilane	Lipids and lipid-like molecules	Prenol lipids	Sesquiterpenoids	C09685	C15H22O	+Na	241.156	0.995057	0.65405	0.954543	0.621233
101	101-9	HMDB0036071	Dendrolasin	Lipids and lipid-like molecules	Prenol lipids	Monoterpenoids	C16779	C15H22O	+Na	241.156	0.995057	0.65405	0.954543	0.621233
101	101-10	HMDB0036109	1,3,5-Bisabolatrien-10-one	Lipids and lipid-like molecules	Prenol lipids	Sesquiterpenoids		C15H22O	+Na	241.156	0.995057	0.65405	0.954543	0.621233
101	101-11	HMDB0036201	(E)-10,11-Dihydro-alpha-atlantone	Lipids and lipid-like molecules	Prenol lipids	Sesquiterpenoids		C15H22O	+Na	241.156	0.995057	0.65405	0.954543	0.621233
101	101-12	HMDB0036443	Rotundone	Lipids and lipid-like molecules	Prenol lipids	Sesquiterpenoids	C17501	C15H22O	+Na	241.156	0.995057	0.65405	0.954543	0.621233
101	101-13	HMDB0036667	Zerumbone	Lipids and lipid-like molecules	Prenol lipids	Sesquiterpenoids		C15H22O	+Na	241.156	0.995057	0.65405	0.954543	0.621233
101	101-14	HMDB0036718	beta-Santalal	Lipids and lipid-like molecules	Prenol lipids	Sesquiterpenoids		C15H22O	+Na	241.156	0.995057	0.65405	0.954543	0.621233
101	101-15	HMDB0036733	Vulgarone A	Lipids and lipid-like molecules	Prenol lipids	Monoterpenoids		C15H22O	+Na	241.156	0.995057	0.65405	0.954543	0.621233
101	101-16	HMDB0036797	Mustakone	Lipids and lipid-like molecules	Prenol lipids	Sesquiterpenoids		C15H22O	+Na	241.156	0.995057	0.65405	0.954543	0.621233
101	101-17	HMDB0036813	alpha-Santalal	Lipids and lipid-like molecules	Prenol lipids	Sesquiterpenoids		C15H22O	+Na	241.156	0.995057	0.65405	0.954543	0.621233
101	101-18	HMDB0037000	alpha-Turmerone	Lipids and lipid-like molecules	Prenol lipids	Sesquiterpenoids		C15H22O	+Na	241.156	0.995057	0.65405	0.954543	0.621233
101	101-19	HMDB0037061	(+)-4,11-Eudesmadien-3-one	Lipids and lipid-like molecules	Prenol lipids	Sesquiterpenoids		C15H22O	+Na	241.156	0.995057	0.65405	0.954543	0.621233
101	101-20	HMDB0037068	Curlone	Lipids and lipid-like molecules	Prenol lipids	Sesquiterpenoids		C15H22O	+Na	241.156	0.995057	0.65405	0.954543	0.621233
101	101-21	HMDB0038164	Vulgarone B	Lipids and lipid-like molecules	Prenol lipids	Sesquiterpenoids		C15H22O	+Na	241.156	0.995057	0.65405	0.954543	0.621233
101	101-22	HMDB0038187	beta-Atlantone	Lipids and lipid-like molecules	Prenol lipids	Sesquiterpenoids		C15H22O	+Na	241.156	0.995057	0.65405	0.954543	0.621233
101	101-23	HMDB0038195	Xanthorrhizol	Lipids and lipid-like molecules	Prenol lipids	Sesquiterpenoids		C15H22O	+Na	241.156	0.995057	0.65405	0.954543	0.621233
101	101-24	HMDB0038200	Calamusenone	Lipids and lipid-like molecules	Prenol lipids	Sesquiterpenoids		C15H22O	+Na	241.156	0.995057	0.65405	0.954543	0.621233
101	101-25	HMDB0038201	4,7(11)-Guaiadien-8-one	Lipids and lipid-like molecules	Prenol lipids	Sesquiterpenoids		C15H22O	+Na	241.156	0.995057	0.65405	0.954543	0.621233
101	101-26	HMDB0038215	alpha-Sinensal	Lipids and lipid-like molecules	Prenol lipids	Sesquiterpenoids	C09729	C15H22O	+Na	241.156	0.995057	0.65405	0.954543	0.621233
101	101-27	HMDB0038511	Bisacumol	Lipids and lipid-like molecules	Prenol lipids	Sesquiterpenoids		C15H22O	+Na	241.156	0.995057	0.65405	0.954543	0.621233
101	101-28	HMDB0039637	beta-Elemenone	Lipids and lipid-like molecules	Prenol lipids	Sesquiterpenoids		C15H22O	+Na	241.156	0.995057	0.65405	0.954543	0.621233
101	101-29	HMDB0040686	Isohumbertiol	Lipids and lipid-like molecules	Prenol lipids	Sesquiterpenoids		C15H22O	+Na	241.156	0.995057	0.65405	0.954543	0.621233
102	102-1	HMDB0013988	N-Deschlorobenzoyl indomethacin	Organoheterocyclic compounds	Indoles and derivatives	Indolyl carboxylic acids and derivatives		C12H13NO3	+Na	242.079	0.997061	0.534811	0.977418	0.521197
103	103-1	HMDB0060774	5-Carboxy-2'-deoxyuridine	Nucleosides, nucleotides, and analogues	Pyrimidine nucleosides	Pyrimidine 2'-deoxyribonucleosides		C10H12N2O7	-H2O+H	255.061	0.998527	0.688258	0.99454	0.683492
104	104-1	HMDB0030813	Cassiachromone	Organoheterocyclic compounds	Benzopyrans	1-benzopyrans		C13H12O4	+Na	255.063	0.998335	0.695907	0.984034	0.683656
104	104-2	HMDB0033330	Dihydrocoriandrin	Organoheterocyclic compounds	Benzopyrans	2-benzopyrans		C13H12O4	+Na	255.063	0.998335	0.695907	0.984034	0.683656
104	104-3	HMDB0038911	(2S,3S,4S)-5,7,9,11-Tridecatetrayne-1,2,3,4-tetrol	Lipids and lipid-like molecules	Fatty Acyls	Fatty alcohols		C13H12O4	+Na	255.063	0.998335	0.695907	0.984034	0.683656
104	104-4	HMDB0041325	Salfredin B11	Organoheterocyclic compounds	Benzopyrans	1-benzopyrans		C13H12O4	+Na	255.063	0.998335	0.695907	0.984034	0.683656
105	105-1	HMDB0004195	5-L-Glutamyl-taurine	Organic acids and derivatives	Carboxylic acids and derivatives	Amino acids, peptides, and analogues	C05844	C7H14N2O6S	+H	255.065	0.998296	0.599994	0.987913	0.591732
106	106-1	HMDB0003312	Daidzein	Phenylpropanoids and polyketides	Isoflavonoids	Isoflav-2-enes	C10208	C15H10O4	+H	255.065	0.998328	0.665929	0.973701	0.647331
106	106-2	HMDB0030670	Chrysophanol	Benzenoids	Anthracenes	Anthraquinones	C10315	C15H10O4	+H	255.065	0.998328	0.665929	0.973701	0.647331
106	106-3	HMDB0030699	5,7-Dihydroxyisoflavone	Phenylpropanoids and polyketides	Isoflavonoids	Isoflav-2-enes	C02168	C15H10O4	+H	255.065	0.998328	0.665929	0.973701	0.647331
106	106-4	HMDB0030874	Phomarin	Benzenoids	Anthracenes	Anthraquinones		C15H10O4	+H	255.065	0.998328	0.665929	0.973701	0.647331
107	107-1	HMDB0028917	Isoleucyl-Threonine	Organic acids and derivatives	Carboxylic acids and derivatives	Amino acids, peptides, and analogues		C10H20N2O4	+Na	255.132	0.99873	0.667414	0.895291	0.596771
107	107-2	HMDB0028939	Leucyl-Threonine	Organic acids and derivatives	Carboxylic acids and derivatives	Amino acids, peptides, and analogues		C10H20N2O4	+Na	255.132	0.99873	0.667414	0.895291	0.596771
107	107-3	HMDB0029064	Threonylisoleucine	Organic acids and derivatives	Carboxylic acids and derivatives	Amino acids, peptides, and analogues		C10H20N2O4	+Na	255.132	0.99873	0.667414	0.895291	0.596771
107	107-4	HMDB0029065	Threonylleucine	Organic acids and derivatives	Carboxylic acids and derivatives	Amino acids, peptides, and analogues		C10H20N2O4	+Na	255.132	0.99873	0.667414	0.895291	0.596771
108	108-1	HMDB0014356	Midodrine	Benzenoids	Benzene and substituted derivatives	Methoxybenzenes	C07890	C12H18N2O4	+H	255.134	0.998716	0.804828	0.994345	0.79925
108	108-2	HMDB0029390	L-Furosine	Organic acids and derivatives	Carboxylic acids and derivatives	Amino acids, peptides, and analogues		C12H18N2O4	+H	255.134	0.998716	0.804828	0.994345	0.79925
108	108-3	HMDB0029443	L-Pyridosine	Organic acids and derivatives	Carboxylic acids and derivatives	Amino acids, peptides, and analogues		C12H18N2O4	+H	255.134	0.998716	0.804828	0.994345	0.79925
108	108-4	HMDB0033143	Pyrraline	Organic acids and derivatives	Carboxylic acids and derivatives	Amino acids, peptides, and analogues		C12H18N2O4	+H	255.134	0.998716	0.804828	0.994345	0.79925
108	108-5	HMDB0037817	Aldosine	Organic acids and derivatives	Carboxylic acids and derivatives	Amino acids, peptides, and analogues		C12H18N2O4	+H	255.134	0.998716	0.804828	0.994345	0.79925
109	109-1	HMDB0036766	Furanogermenone	Lipids and lipid-like molecules	Prenol lipids	Sesquiterpenoids	C17488	C15H20O2	+Na	255.136	0.998727	0.872186	0.984139	0.857261
109	109-2	HMDB0037608	Turmeronol A	Lipids and lipid-like molecules	Prenol lipids	Sesquiterpenoids		C15H20O2	+Na	255.136	0.998727	0.872186	0.984139	0.857261
110	110-1	HMDB0032058	Isoeugenol benzyl ether	Benzenoids	Phenol ethers	Anisoles		C17H18O2	+H	255.138	0.998577	0.764752	0.970729	0.741311
110	110-2	HMDB0032349	Isoeugenyl benzyl ether	Benzenoids	Phenol ethers	Anisoles		C17H18O2	+H	255.138	0.998577	0.764752	0.970729	0.741311
111	111-1	HMDB0037766	3-Mercaptohexyl hexanoate	Lipids and lipid-like molecules	Fatty Acyls	Fatty acid esters		C12H24O2S	+Na	255.139	0.998255	0.70062	0.947915	0.662969
112	112-1	HMDB0037141	4-[(2-Methyl-3-furanyl)thio]-5-nonanone	Organosulfur compounds	Thioethers	Aryl thioethers		C14H22O2S	+H	255.141	0.998439	0.665984	0.629656	0.418686
112	112-2	HMDB0037154	2,6-Dimethyl-3-[(2-methyl-3-furanyl)thio]-4-heptanone	Organosulfur compounds	Thioethers	Aryl thioethers		C14H22O2S	+H	255.141	0.998439	0.665984	0.629656	0.418686
113	113-1	HMDB0033065	(x)-1,2-Propanediol 1-O-b-D-glucopyranoside	Organic oxygen compounds	Organooxygen compounds	Carbohydrates and carbohydrate conjugates		C9H18O7	+NH4	256.139	0.998806	0.585054	0.856743	0.500643
114	114-1	HMDB0062429	7,12-Dimethylbenz[a]anthracene	Benzenoids	Phenanthrenes and derivatives		C19488	C20H16	+H	257.132	0.9988	0.61927	0.947134	0.585828
115	115-1	HMDB0038319	Decarbamoylsaxitoxin	Phenylpropanoids and polyketides	Saxitoxins, gonyautoxins, and derivatives			C9H16N6O3	+H	257.136	0.998822	0.564318	0.979927	0.552339
116	116-1	HMDB0011738	N2-gamma-Glutamylglutamine	Organic acids and derivatives	Carboxylic acids and derivatives	Amino acids, peptides, and analogues	C05283	C10H17N3O6	-H2O+H	258.108	0.997499	0.551053	0.978173	0.537678
116	116-2	HMDB0029147	N-gamma-Glutamylglutamine	Organic acids and derivatives	Carboxylic acids and derivatives	Amino acids, peptides, and analogues		C10H17N3O6	-H2O+H	258.108	0.997499	0.551053	0.978173	0.537678
117	117-1	HMDB0033610	Pandamarilactam 3x	Organoheterocyclic compounds	Dihydrofurans	Furanones		C13H17NO3	+Na	258.11	0.99766	0.587397	0.969919	0.568394
118	118-1	HMDB0033345	(±)-Ribaline	Organoheterocyclic compounds	Quinolines and derivatives	Dihydrofuranoquinolines		C15H17NO4	-H2O+H	258.113	0.997583	0.578118	0.966065	0.55715
118	118-2	HMDB0041329	5-Amino-6-(4-hydroxy-2-butenoyl)-2,2-dimethyl-4-chromanone	Organoheterocyclic compounds	Benzopyrans	1-benzopyrans		C15H17NO4	-H2O+H	258.113	0.997583	0.578118	0.966065	0.55715
119	119-1	HMDB0030965	9-Octadecenal	Lipids and lipid-like molecules	Fatty Acyls	Fatty aldehydes		C18H34O	+H	267.268	0.996643	0.667162	0.971057	0.645678
120	120-1	HMDB0000220	Palmitic acid	Lipids and lipid-like molecules	Fatty Acyls	Fatty acids and conjugates	C00249	C16H32O2	+NH4	274.274	0.997657	0.820486	0.994274	0.813876
120	120-2	HMDB0002396	Trimethyltridecanoic acid	Lipids and lipid-like molecules	Prenol lipids	Sesquiterpenoids		C16H32O2	+NH4	274.274	0.997657	0.820486	0.994274	0.813876
120	120-3	HMDB0031068	Isopalmitic acid	Lipids and lipid-like molecules	Fatty Acyls	Fatty acids and conjugates		C16H32O2	+NH4	274.274	0.997657	0.820486	0.994274	0.813876
120	120-4	HMDB0032065	Butyl dodecanoate	Lipids and lipid-like molecules	Fatty Acyls	Fatty acid esters		C16H32O2	+NH4	274.274	0.997657	0.820486	0.994274	0.813876
120	120-5	HMDB0032249	Dodecyl butyrate	Lipids and lipid-like molecules	Fatty Acyls	Fatty alcohol esters		C16H32O2	+NH4	274.274	0.997657	0.820486	0.994274	0.813876
120	120-6	HMDB0032324	Hexyl decanoate	Lipids and lipid-like molecules	Fatty Acyls	Fatty acid esters		C16H32O2	+NH4	274.274	0.997657	0.820486	0.994274	0.813876
120	120-7	HMDB0033166	Octyl octanoate	Lipids and lipid-like molecules	Fatty Acyls	Fatty alcohol esters		C16H32O2	+NH4	274.274	0.997657	0.820486	0.994274	0.813876
120	120-8	HMDB0034153	Ethyl tetradecanoate	Lipids and lipid-like molecules	Fatty Acyls	Fatty acid esters		C16H32O2	+NH4	274.274	0.997657	0.820486	0.994274	0.813876
120	120-9	HMDB0036210	Dodecyl 2-methylpropanoate	Lipids and lipid-like molecules	Fatty Acyls	Fatty alcohol esters		C16H32O2	+NH4	274.274	0.997657	0.820486	0.994274	0.813876
121	121-1	HMDB0060782	6-allyl-8b-Carboxy-ergoline	Alkaloids and derivatives	Ergoline and derivatives	Lysergic acids and derivatives		C18H20N2O2	-H2O+H	279.149	0.997284	0.544898	0.95027	0.516394
122	122-1	HMDB0013133	Methylmalonylcarnitine	Lipids and lipid-like molecules	Fatty Acyls	Fatty acid esters		C11H19NO6	+NH4	279.155	0.997066	0.940987	0.976083	0.915786
122	122-2	HMDB0033865	Lotaustralin	Organic oxygen compounds	Organooxygen compounds	Carbohydrates and carbohydrate conjugates	C08334	C11H19NO6	+NH4	279.155	0.997066	0.940987	0.976083	0.915786
122	122-3	HMDB0034777	Epidermin	Organic oxygen compounds	Organooxygen compounds	Carbohydrates and carbohydrate conjugates		C11H19NO6	+NH4	279.155	0.997066	0.940987	0.976083	0.915786
122	122-4	HMDB0061717	Succinylcarnitine	Lipids and lipid-like molecules	Fatty Acyls	Fatty acid esters		C11H19NO6	+NH4	279.155	0.997066	0.940987	0.976083	0.915786
122	122-5	HMDB0062785	O-methylmalonyl-L-carnitine	Lipids and lipid-like molecules	Fatty Acyls	Fatty acid esters		C11H19NO6	+NH4	279.155	0.997066	0.940987	0.976083	0.915786
123	123-1	HMDB0039082	Camelinin	Organosulfur compounds	Sulfoxides			C12H23NOS2	+NH4	279.156	0.997251	0.574626	0.962066	0.551309
124	124-1	HMDB0030993	5-Nonyltetrahydro-2-oxo-3-furancarboxylic acid	Organoheterocyclic compounds	Lactones	Gamma butyrolactones		C14H24O4	+Na	279.157	0.997239	0.86353	0.998432	0.859795
124	124-2	HMDB0036143	Monomenthyl succinate	Lipids and lipid-like molecules	Prenol lipids	Monoterpenoids		C14H24O4	+Na	279.157	0.997239	0.86353	0.998432	0.859795
125	125-1	HMDB0039376	Methyl dihydrophaseate	Lipids and lipid-like molecules	Prenol lipids	Sesquiterpenoids		C16H24O5	-H2O+H	279.159	0.99702	0.980668	0.998683	0.976457
125	125-2	HMDB0041551	3,8-Dihydroxy-6-methoxy-7(11)-eremophilen-12,8-olide	Lipids and lipid-like molecules	Prenol lipids	Terpene lactones		C16H24O5	-H2O+H	279.159	0.99702	0.980668	0.998683	0.976457
126	126-1	HMDB0240241	Thenyldiamine	Organic nitrogen compounds	Organonitrogen compounds	Amines		C14H19N3S	+NH4	279.164	0.997139	0.856265	0.981749	0.838232
127	127-1	HMDB0002248	Gamma glutamyl ornithine	Organic acids and derivatives	Carboxylic acids and derivatives	Amino acids, peptides, and analogues		C10H19N3O5	+NH4	279.166	0.997404	0.828143	0.502945	0.415429
127	127-2	HMDB0004985	N6-beta-Aspartyllysine	Organic acids and derivatives	Carboxylic acids and derivatives	Amino acids, peptides, and analogues		C10H19N3O5	+NH4	279.166	0.997404	0.828143	0.502945	0.415429
127	127-3	HMDB0004987	Aspartyllysine	Organic acids and derivatives	Carboxylic acids and derivatives	Amino acids, peptides, and analogues		C10H19N3O5	+NH4	279.166	0.997404	0.828143	0.502945	0.415429
127	127-4	HMDB0028758	Aspartyl-Lysine	Organic acids and derivatives	Carboxylic acids and derivatives	Amino acids, peptides, and analogues		C10H19N3O5	+NH4	279.166	0.997404	0.828143	0.502945	0.415429
127	127-5	HMDB0028947	Lysylaspartic acid	Organic acids and derivatives	Carboxylic acids and derivatives	Amino acids, peptides, and analogues		C10H19N3O5	+NH4	279.166	0.997404	0.828143	0.502945	0.415429
128	128-1	HMDB0014965	Cinoxacin	Organoheterocyclic compounds	Diazanaphthalenes	Benzodiazines	C08052	C12H10N2O5	+NH4	280.093	0.997789	0.802262	0.979366	0.783971
129	129-1	HMDB0060396	5-Fluorouridine	Nucleosides, nucleotides, and analogues	Pyrimidine nucleosides		C16633	C9H11FN2O6	+NH4	280.094	0.997776	0.783366	0.98926	0.773229
130	130-1	HMDB0030244	Graveolinine	Organoheterocyclic compounds	Quinolines and derivatives			C17H13NO3	+H	280.097	0.997461	0.629308	0.955609	0.599845
130	130-2	HMDB0033480	Graveoline	Organoheterocyclic compounds	Quinolines and derivatives	Quinolones and derivatives	C10689	C17H13NO3	+H	280.097	0.997461	0.629308	0.955609	0.599845
130	130-3	HMDB0038955	Avenalumin II	Organoheterocyclic compounds	Benzoxazines			C17H13NO3	+H	280.097	0.997461	0.629308	0.955609	0.599845
131	131-1	HMDB0011177	Phenylalanylproline	Organic acids and derivatives	Carboxylic acids and derivatives	Amino acids, peptides, and analogues		C14H18N2O3	+NH4	280.166	0.997136	0.834376	0.952063	0.792104
131	131-2	HMDB0011179	Prolylphenylalanine	Organic acids and derivatives	Carboxylic acids and derivatives	Amino acids, peptides, and analogues		C14H18N2O3	+NH4	280.166	0.997136	0.834376	0.952063	0.792104
132	132-1	HMDB0030202	Fumigaclavine A	Alkaloids and derivatives	Ergoline and derivatives	Clavines and derivatives		C18H22N2O2	-H2O+H	281.165	0.997243	0.53847	0.953158	0.511832
132	132-2	HMDB0038832	2,9-Dimethyl-2,9-diazatricyclo[10.2.2.25,8]octadeca-5,7,12,14,15,17-hexaene-3,10-diol, 9CI	Organic nitrogen compounds	Organonitrogen compounds	Amines		C18H22N2O2	-H2O+H	281.165	0.997243	0.53847	0.953158	0.511832
133	133-1	HMDB0001235	5-Aminoimidazole ribonucleotide	Organic oxygen compounds	Organooxygen compounds	Carbohydrates and carbohydrate conjugates	C03373	C8H14N3O7P	+H	296.064	0.99771	0.768896	0.9915	0.760614
133	133-2	HMDB0062575	5-amino-1-(5-phosphonato-D-ribosyl)imidazol-3-ium	Organic oxygen compounds	Organooxygen compounds	Carbohydrates and carbohydrate conjugates		C8H14N3O7P	+H	296.064	0.99771	0.768896	0.9915	0.760614
134	134-1	HMDB0000982	5-Methylcytidine	Nucleosides, nucleotides, and analogues	Pyrimidine nucleosides			C10H15N3O5	+K	296.064	0.99771	0.895233	0.985284	0.880038
134	134-2	HMDB0039229	Pyro-L-glutaminyl-L-glutamine	Organic acids and derivatives	Carboxylic acids and derivatives	Amino acids, peptides, and analogues		C10H15N3O5	+K	296.064	0.99771	0.895233	0.985284	0.880038
134	134-3	HMDB0240577	3-Methylcytidine	Nucleosides, nucleotides, and analogues	Pyrimidine nucleosides			C10H15N3O5	+K	296.064	0.99771	0.895233	0.985284	0.880038
135	135-1	HMDB0000086	Glycerophosphocholine	Lipids and lipid-like molecules	Glycerophospholipids	Glycerophosphocholines	C00670	C8H20NO6P	+K	296.066	0.997669	0.888815	0.987965	0.876071
136	136-1	HMDB0014643	Tolmetin	Organic oxygen compounds	Organooxygen compounds	Carbonyl compounds	C07149	C15H15NO3	+K	296.068	0.997607	0.84927	0.968436	0.820495
137	137-1	HMDB0060432	Alcophosphamide	Organic nitrogen compounds	Organonitrogen compounds	Nitrogen mustard compounds	C16551	C7H17Cl2N2O3P	+NH4	296.069	0.997622	0.776173	0.821501	0.636111
137	137-2	HMDB0060693	Alcoifosfamide	Organic acids and derivatives	Organic phosphoric acids and derivatives	Organic phosphoramides	C16558	C7H17Cl2N2O3P	+NH4	296.069	0.997622	0.776173	0.821501	0.636111
138	138-1	HMDB0013854	N4-Acetylsulfamethoxazole	Benzenoids	Benzene and substituted derivatives	Benzenesulfonamides	C13061	C12H13N3O4S	+H	296.07	0.997624	0.846019	0.963504	0.813206
139	139-1	HMDB0014883	Modafinil	Benzenoids	Benzene and substituted derivatives	Diphenylmethanes		C15H15NO2S	+Na	296.072	0.99756	0.718308	0.926762	0.664076
140	140-1	HMDB0001285	Geranyl-PP	Lipids and lipid-like molecules	Prenol lipids	Isoprenoid phosphates	C05847	C10H20O7P2	-H2O+H	297.065	0.995342	0.607783	0.867689	0.524911
141	141-1	HMDB0003950	7-Methylinosine	Nucleosides, nucleotides, and analogues	Purine nucleosides			C11H15N4O5	+NH4	301.138	0.998179	0.708288	0.976507	0.69039
142	142-1	HMDB0032297	Glyceryl 5-hydroxydecanoate	Lipids and lipid-like molecules	Fatty Acyls	Fatty alcohols		C13H26O5	+K	301.141	0.998378	0.669196	0.976114	0.652152
143	143-1	HMDB0030755	Myrigalone E	Phenylpropanoids and polyketides	Linear 1,3-diarylpropanoids	Chalcones and dihydrochalcones		C18H20O4	+H	301.143	0.998485	0.677258	0.994368	0.672424
143	143-2	HMDB0030922	1,3-Diacetoxy-4,6,12-tetradecatriene-8,10-diyne	Lipids and lipid-like molecules	Fatty Acyls	Fatty alcohol esters		C18H20O4	+H	301.143	0.998485	0.677258	0.994368	0.672424
143	143-3	HMDB0037245	Myrigalone A	Lipids and lipid-like molecules	Prenol lipids	Monoterpenoids		C18H20O4	+H	301.143	0.998485	0.677258	0.994368	0.672424
144	144-1	HMDB0060947	desmethylclomipramine	Organoheterocyclic compounds	Benzazepines	Dibenzazepines		C18H21ClN2	+H	301.147	0.998272	0.54488	0.901476	0.490347
144	144-2	HMDB0240224	Chlorcyclizine	Benzenoids	Benzene and substituted derivatives	Diphenylmethanes		C18H21ClN2	+H	301.147	0.998272	0.54488	0.901476	0.490347
145	145-1	HMDB0029151	gamma-Glutamylhistidine	Organic acids and derivatives	Carboxylic acids and derivatives	Amino acids, peptides, and analogues		C11H16N4O5	+NH4	302.146	0.998379	0.683446	0.987212	0.673613
146	146-1	HMDB0000269	Sphinganine	Organic nitrogen compounds	Organonitrogen compounds	Amines	C00836	C18H39NO2	+H	302.305	0.997669	0.663382	0.990818	0.655759
147	147-1	HMDB0031471	Diplodiatoxin	Organic acids and derivatives	Keto acids and derivatives	Gamma-keto acids and derivatives		C18H28O4	+H	309.206	0.998563	0.614768	0.986297	0.605472
147	147-2	HMDB0032664	Corchorifatty acid A	Lipids and lipid-like molecules	Fatty Acyls	Lineolic acids and derivatives		C18H28O4	+H	309.206	0.998563	0.614768	0.986297	0.605472
147	147-3	HMDB0033243	Corchorifatty acid D	Lipids and lipid-like molecules	Fatty Acyls	Lineolic acids and derivatives		C18H28O4	+H	309.206	0.998563	0.614768	0.986297	0.605472
148	148-1	HMDB0029745	Fenbendazole	Organoheterocyclic compounds	Benzimidazoles	2-benzimidazolylcarbamic acid esters		C15H13N3O2S	+NH4	317.107	0.997852	0.536099	0.560756	0.299975
149	149-1	HMDB0000594	gamma-Glutamylphenylalanine	Organic acids and derivatives	Carboxylic acids and derivatives	Amino acids, peptides, and analogues		C14H18N2O5	+Na	317.111	0.998262	0.730493	0.974962	0.710965
149	149-2	HMDB0029106	​Tyrosylhydroxyproline	Organic acids and derivatives	Carboxylic acids and derivatives	Amino acids, peptides, and analogues		C14H18N2O5	+Na	317.111	0.998262	0.730493	0.974962	0.710965
150	150-1	HMDB0001016	D-4'-Phosphopantothenate	Organic acids and derivatives	Carboxylic acids and derivatives	Amino acids, peptides, and analogues	C03492	C9H18NO8P	+NH4	317.111	0.998371	0.80313	0.965417	0.774092
151	151-1	HMDB0034937	Cappariloside A	Organic oxygen compounds	Organooxygen compounds	Carbohydrates and carbohydrate conjugates		C16H18N2O6	-H2O+H	317.113	0.998577	0.964151	0.993422	0.956446
152	152-1	HMDB0033331	(E)-1-[4-Hydroxy-3-(3-methyl-1,3-butadienyl)phenyl]-2-(3,5-dihydroxyphenyl)ethylene	Phenylpropanoids and polyketides	Stilbenes			C19H18O3	+Na	317.115	0.998378	0.957397	0.988076	0.944446
152	152-2	HMDB0041305	1-Methoxy-4-[5-(4-methoxyphenoxy)-3-penten-1-ynyl]benzene	Benzenoids	Phenol ethers	Anisoles		C19H18O3	+Na	317.115	0.998378	0.957397	0.988076	0.944446
153	153-1	HMDB0001518	alpha-CEHC	Organoheterocyclic compounds	Benzopyrans	1-benzopyrans		C16H22O4	+K	317.115	0.998468	0.983699	0.996392	0.978648
153	153-2	HMDB0013248	Monoethylhexyl phthalic acid	Benzenoids	Benzene and substituted derivatives	Benzoic acids and derivatives	C03343	C16H22O4	+K	317.115	0.998468	0.983699	0.996392	0.978648
153	153-3	HMDB0013835	Diisobutyl phthalate	Benzenoids	Benzene and substituted derivatives	Benzoic acids and derivatives	C15205	C16H22O4	+K	317.115	0.998468	0.983699	0.996392	0.978648
154	154-1	HMDB0014618	Chlordiazepoxide	Organoheterocyclic compounds	Benzodiazepines	1,4-benzodiazepines		C16H14ClN3O	+NH4	317.116	0.998409	0.967716	0.917545	0.88651
155	155-1	HMDB0002044	8-Hydroxyguanosine	Nucleosides, nucleotides, and analogues	Purine nucleosides			C10H13N5O6	+NH4	317.12	0.998206	0.796591	0.748283	0.595006
156	156-1	HMDB0031693	Ethyl (S)-3-hydroxybutyrate glucoside	Lipids and lipid-like molecules	Fatty Acyls	Fatty acyl glycosides		C12H22O8	+Na	317.121	0.998206	0.955583	0.991124	0.945402
157	157-1	HMDB0032013	Vanilloloside	Organic oxygen compounds	Organooxygen compounds	Carbohydrates and carbohydrate conjugates		C14H20O8	+H	317.123	0.998386	0.614226	0.973854	0.597201
158	158-1	HMDB0014450	Mitomycin	Organoheterocyclic compounds	Indoles and derivatives	Indolequinones	C06681	C15H18N4O5	-H2O+H	317.124	0.998334	0.639332	0.983716	0.627873
159	159-1	HMDB0041245	7-Hydroxyheptaphylline	Organoheterocyclic compounds	Indoles and derivatives	Carbazoles		C18H17NO3	+Na	318.11	0.998197	0.887614	0.527043	0.466968
160	160-1	HMDB0031802	(±)-Metalaxyl	Organic acids and derivatives	Carboxylic acids and derivatives	Amino acids, peptides, and analogues	C10947	C15H21NO4	+K	318.11	0.998208	0.83627	0.502907	0.419812
161	161-1	HMDB0029497	Dimethyl fukiic acid	Benzenoids	Phenols	Benzenediols		C13H16O8	+NH4	318.118	0.998579	0.874007	0.976363	0.852136
161	161-2	HMDB0041271	Salicylic acid beta-D-glucoside	Organic oxygen compounds	Organooxygen compounds	Carbohydrates and carbohydrate conjugates		C13H16O8	+NH4	318.118	0.998579	0.874007	0.976363	0.852136
161	161-3	HMDB0240458	4-Methylcatechol 1-glucuronide					C13H16O8	+NH4	318.118	0.998579	0.874007	0.976363	0.852136
161	161-4	HMDB0240460	4-Methylcatechol 2-glucuronide					C13H16O8	+NH4	318.118	0.998579	0.874007	0.976363	0.852136
162	162-1	HMDB0015228	Oxamniquine	Organoheterocyclic compounds	Quinolines and derivatives	Nitroquinolines and derivatives	C07341	C14H21N3O3	+K	318.122	0.998327	0.820341	0.970556	0.794854
163	163-1	HMDB0028980	Methionyl-Phenylalanine	Organic acids and derivatives	Carboxylic acids and derivatives	Amino acids, peptides, and analogues		C14H20N2O3S	+Na	319.109	0.998469	0.555331	0.979262	0.542981
163	163-2	HMDB0029001	Phenylalanylmethionine	Organic acids and derivatives	Carboxylic acids and derivatives	Amino acids, peptides, and analogues		C14H20N2O3S	+Na	319.109	0.998469	0.555331	0.979262	0.542981
164	164-1	HMDB0033295	7-(4-Hydroxyphenyl)-1-phenyl-4-hepten-3-one	Phenylpropanoids and polyketides	Diarylheptanoids	Linear diarylheptanoids		C19H20O2	+K	319.11	0.99858	0.631464	0.974792	0.614671
165	165-1	HMDB0033927	3-Hydroxymugineic acid	Organic acids and derivatives	Carboxylic acids and derivatives	Amino acids, peptides, and analogues		C12H20N2O9	-H2O+H	319.114	0.998463	0.792373	0.983728	0.778281
166	166-1	HMDB0036156	Deoxynivalenol	Lipids and lipid-like molecules	Prenol lipids	Sesquiterpenoids	C09747	C15H20O6	+Na	319.115	0.998313	0.774789	0.988101	0.764278
166	166-2	HMDB0036867	Marasmal	Organoheterocyclic compounds	Naphthofurans			C15H20O6	+Na	319.115	0.998313	0.774789	0.988101	0.764278
166	166-3	HMDB0039810	Cyclocalopin A	Organoheterocyclic compounds	Furopyrans			C15H20O6	+Na	319.115	0.998313	0.774789	0.988101	0.764278
166	166-4	HMDB0039812	Cyclocalopin C1	Organoheterocyclic compounds	Furopyrans			C15H20O6	+Na	319.115	0.998313	0.774789	0.988101	0.764278
166	166-5	HMDB0039814	Cyclocalopin E	Organoheterocyclic compounds	Furopyrans			C15H20O6	+Na	319.115	0.998313	0.774789	0.988101	0.764278
166	166-6	HMDB0041617	Chavicol O-beta-glucopyranoside	Organic oxygen compounds	Organooxygen compounds	Carbohydrates and carbohydrate conjugates		C15H20O6	+Na	319.115	0.998313	0.774789	0.988101	0.764278
167	167-1	HMDB0030663	4',7-Di-O-methylcatechin	Phenylpropanoids and polyketides	Flavonoids	Flavans		C17H18O6	+H	319.118	0.997918	0.618714	0.993496	0.61341
168	168-1	HMDB0032800	Feruloylcholine	Phenylpropanoids and polyketides	Cinnamic acids and derivatives	Hydroxycinnamic acids and derivatives		C15H22NO4	+K	319.118	0.998306	0.558281	0.981559	0.547057
169	169-1	HMDB0003409	Berberine	Alkaloids and derivatives	Protoberberine alkaloids and derivatives		C00757	C20H18NO4	-H2O+H	319.12	0.998355	0.582027	0.95024	0.552155
170	170-1	HMDB0060472	Didemethylcitalopram	Benzenoids	Benzene and substituted derivatives	Phenylbutylamines	C16609	C18H17FN2O	+Na	319.122	0.9986	0.586053	0.938809	0.549422
171	171-1	HMDB0005028	Escitalopram	Benzenoids	Benzene and substituted derivatives	Phenylbutylamines		C20H21FN2O	+H	325.171	0.998664	0.834971	0.882142	0.735579
172	172-1	HMDB0038582	5-Amino-2,3-dihydro-6-(3-hydroxy-4-methoxy-1-oxobutyl)-2,2-dimethyl-4H-1-benzopyran-4-one	Organoheterocyclic compounds	Benzopyrans	1-benzopyrans		C16H21NO5	+NH4	325.176	0.998633	0.86748	0.996619	0.863365
173	173-1	HMDB0000380	2-Hydroxyestradiol-3-methyl ether	Lipids and lipid-like molecules	Steroids and steroid derivatives	Estrane steroids		C19H26O3	+Na	325.177	0.998595	0.821553	0.983683	0.807012
173	173-2	HMDB0000405	2-Methoxyestradiol	Lipids and lipid-like molecules	Steroids and steroid derivatives	Estrane steroids	C05302	C19H26O3	+Na	325.177	0.998595	0.821553	0.983683	0.807012
173	173-3	HMDB0003959	19-Oxotestosterone	Lipids and lipid-like molecules	Steroids and steroid derivatives	Androstane steroids	C05295	C19H26O3	+Na	325.177	0.998595	0.821553	0.983683	0.807012
173	173-4	HMDB0012782	4-Methoxy-17beta-estradiol	Lipids and lipid-like molecules	Steroids and steroid derivatives	Estrane steroids		C19H26O3	+Na	325.177	0.998595	0.821553	0.983683	0.807012
173	173-5	HMDB0034028	2-(3,7-Dimethyl-2,6-octadienyl)-4-hydroxy-6-methoxyacetophenone	Organic oxygen compounds	Organooxygen compounds	Carbonyl compounds		C19H26O3	+Na	325.177	0.998595	0.821553	0.983683	0.807012
173	173-6	HMDB0040927	2-Hexyl-5-[2-(4-hydroxy-3-methoxyphenyl)ethyl]furan	Lipids and lipid-like molecules	Fatty Acyls	Fatty acids and conjugates		C19H26O3	+Na	325.177	0.998595	0.821553	0.983683	0.807012
174	174-1	HMDB0000672	Hexadecanedioic acid	Lipids and lipid-like molecules	Fatty Acyls	Fatty acids and conjugates	C19615	C16H30O4	+K	325.178	0.99863	0.808989	0.988603	0.798674
174	174-2	HMDB0041287	16-Hydroxy-10-oxohexadecanoic acid	Lipids and lipid-like molecules	Fatty Acyls	Fatty acids and conjugates		C16H30O4	+K	325.178	0.99863	0.808989	0.988603	0.798674
175	175-1	HMDB0060359	2,3-Epoxymenaquinone	Lipids and lipid-like molecules	Prenol lipids	Quinone and hydroquinone lipids	C20265	C21H24O3	+H	325.18	0.998415	0.756722	0.980036	0.740439
176	176-1	HMDB0031997	Simulenoline	Organoheterocyclic compounds	Quinolines and derivatives	Quinolones and derivatives		C20H23NO3	+H	326.175	0.997683	0.547522	0.695761	0.380062
177	177-1	HMDB0061161	N-Desalkyl flurazepam	Organoheterocyclic compounds	Benzodiazepines	1,4-benzodiazepines		C15H10ClFN2O	+K	327.01	0.997272	0.61533	0.833355	0.511389
178	178-1	HMDB0000417	3D,7D,11D-Phytanic acid	Lipids and lipid-like molecules	Prenol lipids	Diterpenoids		C20H40O2	+NH4	330.337	0.997713	0.704719	0.993626	0.698626
178	178-2	HMDB0000553	3L,7D,11D-Phytanic acid	Lipids and lipid-like molecules	Prenol lipids	Diterpenoids		C20H40O2	+NH4	330.337	0.997713	0.704719	0.993626	0.698626
178	178-3	HMDB0000801	Phytanic acid	Lipids and lipid-like molecules	Prenol lipids	Diterpenoids	C01607	C20H40O2	+NH4	330.337	0.997713	0.704719	0.993626	0.698626
178	178-4	HMDB0002212	Arachidic acid	Lipids and lipid-like molecules	Fatty Acyls	Fatty acids and conjugates	C06425	C20H40O2	+NH4	330.337	0.997713	0.704719	0.993626	0.698626
178	178-5	HMDB0031318	2,2,6,10,14-Pentamethylpentadecanoic acid	Lipids and lipid-like molecules	Prenol lipids	Diterpenoids		C20H40O2	+NH4	330.337	0.997713	0.704719	0.993626	0.698626
178	178-6	HMDB0035672	5-Hydroxy-7-eicosanone	Lipids and lipid-like molecules	Fatty Acyls	Fatty alcohols		C20H40O2	+NH4	330.337	0.997713	0.704719	0.993626	0.698626
178	178-7	HMDB0035673	4-Hydroxy-6-eicosanone	Lipids and lipid-like molecules	Fatty Acyls	Fatty alcohols		C20H40O2	+NH4	330.337	0.997713	0.704719	0.993626	0.698626
178	178-8	HMDB0062520	3,7R,11R,15-tetramethyl-hexadecanoic acid	Lipids and lipid-like molecules	Prenol lipids	Diterpenoids		C20H40O2	+NH4	330.337	0.997713	0.704719	0.993626	0.698626
179	179-1	HMDB0011533	MG(16:0)	Lipids and lipid-like molecules	Glycerolipids	Monoradylglycerols		C19H38O4	+H	331.284	0.996687	0.968973	0.99798	0.963812
180	180-1	HMDB0000782	Octadecanedioic acid	Lipids and lipid-like molecules	Fatty Acyls	Fatty acids and conjugates		C18H34O4	+NH4	332.28	0.997684	0.619011	0.98992	0.611352
180	180-2	HMDB0004704	9,10-DHOME	Lipids and lipid-like molecules	Fatty Acyls	Fatty acids and conjugates		C18H34O4	+NH4	332.28	0.997684	0.619011	0.98992	0.611352
180	180-3	HMDB0004705	12,13-DHOME	Lipids and lipid-like molecules	Fatty Acyls	Fatty acids and conjugates	C14829	C18H34O4	+NH4	332.28	0.997684	0.619011	0.98992	0.611352
180	180-4	HMDB0041220	Dibutyl decanedioate	Lipids and lipid-like molecules	Fatty Acyls	Fatty acid esters		C18H34O4	+NH4	332.28	0.997684	0.619011	0.98992	0.611352
181	181-1	HMDB0032740	N-Hexadecanoylpyrrolidine	Organoheterocyclic compounds	Pyrrolidines	N-acylpyrrolidines		C20H39NO	+Na	332.292	0.997149	0.661205	0.958343	0.631854
182	182-1	HMDB0013625	Dihomo-gamma-linolenoylethanolamide	Organic nitrogen compounds	Organonitrogen compounds	Amines	C13828	C22H39NO2	-H2O+H	332.295	0.996813	0.682608	0.941771	0.640811
183	183-1	HMDB0032476	Polyoxyethylene (600) monoricinoleate	Lipids and lipid-like molecules	Fatty Acyls	Fatty alcohols		C21H40O3	+H	341.305	0.996759	0.854504	0.992484	0.845333
184	184-1	HMDB0002337	Homophytanic acid	Lipids and lipid-like molecules	Prenol lipids	Diterpenoids		C21H42O2	+Na	349.308	0.997436	0.630533	0.958253	0.602661
184	184-2	HMDB0002345	Heneicosanoic acid	Lipids and lipid-like molecules	Fatty Acyls	Fatty acids and conjugates		C21H42O2	+Na	349.308	0.997436	0.630533	0.958253	0.602661
184	184-3	HMDB0031319	2,3,7,11,15-Pentamethylhexadecanoic acid	Lipids and lipid-like molecules	Prenol lipids	Diterpenoids		C21H42O2	+Na	349.308	0.997436	0.630533	0.958253	0.602661
184	184-4	HMDB0035668	6-Hydroxy-8-heneicosanone	Lipids and lipid-like molecules	Fatty Acyls	Fatty alcohols		C21H42O2	+Na	349.308	0.997436	0.630533	0.958253	0.602661
184	184-5	HMDB0035669	8-Hydroxy-6-heneicosanone	Lipids and lipid-like molecules	Fatty Acyls	Fatty alcohols		C21H42O2	+Na	349.308	0.997436	0.630533	0.958253	0.602661
184	184-6	HMDB0035670	4-Hydroxy-6-heneicosanone	Lipids and lipid-like molecules	Fatty Acyls	Fatty alcohols		C21H42O2	+Na	349.308	0.997436	0.630533	0.958253	0.602661
184	184-7	HMDB0035671	6-Hydroxy-4-heneicosanone	Lipids and lipid-like molecules	Fatty Acyls	Fatty alcohols		C21H42O2	+Na	349.308	0.997436	0.630533	0.958253	0.602661
185	185-1	HMDB0038530	5-Heptadecyl-1,3-benzenediol	Benzenoids	Phenols	Benzenediols		C23H40O2	+H	349.31	0.99722	0.717123	0.947433	0.677537
186	186-1	HMDB0060098	9-peroxy-5Z,7E,11Z,14Z-eicosatetraenoate	Lipids and lipid-like molecules	Fatty Acyls	Fatty acids and conjugates		C20H31O4	+NH4	353.256	0.997534	0.667911	0.973692	0.648737
186	186-2	HMDB0060099	11-peroxy-5Z,8Z,12E,14Z-eicosatetraenoate	Lipids and lipid-like molecules	Fatty Acyls	Fatty acids and conjugates		C20H31O4	+NH4	353.256	0.997534	0.667911	0.973692	0.648737
187	187-1	HMDB0011539	MG(18:3)	Lipids and lipid-like molecules	Fatty Acyls	Lineolic acids and derivatives		C21H36O4	+H	353.269	0.997391	0.971436	0.991075	0.960254
188	188-1	HMDB0001085	Leukotriene B4	Lipids and lipid-like molecules	Fatty Acyls	Eicosanoids	C02165	C20H32O4	+NH4	354.264	0.99761	0.633765	0.98506	0.622805
188	188-2	HMDB0004688	Hepoxilin A3	Lipids and lipid-like molecules	Fatty Acyls	Eicosanoids	C14808	C20H32O4	+NH4	354.264	0.99761	0.633765	0.98506	0.622805
188	188-3	HMDB0004690	Hepoxilin B3	Lipids and lipid-like molecules	Fatty Acyls	Eicosanoids	C14810	C20H32O4	+NH4	354.264	0.99761	0.633765	0.98506	0.622805
188	188-4	HMDB0004693	11H-14,15-EETA	Lipids and lipid-like molecules	Fatty Acyls	Fatty acids and conjugates	C14813	C20H32O4	+NH4	354.264	0.99761	0.633765	0.98506	0.622805
188	188-5	HMDB0005050	15H-11,12-EETA	Organic acids and derivatives	Hydroxy acids and derivatives	Medium-chain hydroxy acids and derivatives	C14781	C20H32O4	+NH4	354.264	0.99761	0.633765	0.98506	0.622805
188	188-6	HMDB0005087	6-trans-Leukotriene B4	Lipids and lipid-like molecules	Fatty Acyls	Eicosanoids		C20H32O4	+NH4	354.264	0.99761	0.633765	0.98506	0.622805
188	188-7	HMDB0005088	6-trans-12-epi-Leukotriene B4	Lipids and lipid-like molecules	Fatty Acyls	Eicosanoids		C20H32O4	+NH4	354.264	0.99761	0.633765	0.98506	0.622805
188	188-8	HMDB0005089	12(S)-Leukotriene B4	Lipids and lipid-like molecules	Fatty Acyls	Eicosanoids	C04853	C20H32O4	+NH4	354.264	0.99761	0.633765	0.98506	0.622805
188	188-9	HMDB0010216	5,15-DiHETE	Lipids and lipid-like molecules	Fatty Acyls	Eicosanoids		C20H32O4	+NH4	354.264	0.99761	0.633765	0.98506	0.622805
188	188-10	HMDB0010219	8,15-DiHETE	Lipids and lipid-like molecules	Fatty Acyls	Eicosanoids		C20H32O4	+NH4	354.264	0.99761	0.633765	0.98506	0.622805
188	188-11	HMDB0012498	10,11-dihydro-12-oxo-LTB4	Lipids and lipid-like molecules	Fatty Acyls	Eicosanoids		C20H32O4	+NH4	354.264	0.99761	0.633765	0.98506	0.622805
188	188-12	HMDB0012839	6,7-dihydro-5-oxo-12-epi-LTB4	Lipids and lipid-like molecules	Fatty Acyls	Eicosanoids		C20H32O4	+NH4	354.264	0.99761	0.633765	0.98506	0.622805
188	188-13	HMDB0060103	9-Deoxy-delta12-PGD2	Lipids and lipid-like molecules	Fatty Acyls	Eicosanoids		C20H32O4	+NH4	354.264	0.99761	0.633765	0.98506	0.622805
188	188-14	HMDB0062409	5,12-dihydroxy-6,8,10,14-eicosatetraenoic acid	Lipids and lipid-like molecules	Fatty Acyls	Eicosanoids		C20H32O4	+NH4	354.264	0.99761	0.633765	0.98506	0.622805
188	188-15	HMDB0062479	10-hydroxy-11S,12S-epoxy-5Z,8Z,14Z-eicosatrienoic acid	Lipids and lipid-like molecules	Fatty Acyls	Eicosanoids		C20H32O4	+NH4	354.264	0.99761	0.633765	0.98506	0.622805
188	188-16	HMDB0062615	5(S),11(R)-DiHETE	Lipids and lipid-like molecules	Fatty Acyls	Eicosanoids		C20H32O4	+NH4	354.264	0.99761	0.633765	0.98506	0.622805
188	188-17	HMDB0062619	(5Z,9E,14Z)-(8xi,11R,12S)-11,12-epoxy-8-hydroxyicosa-5,9,14-trienoic Acid	Lipids and lipid-like molecules	Fatty Acyls	Eicosanoids	C04849	C20H32O4	+NH4	354.264	0.99761	0.633765	0.98506	0.622805
188	188-18	HMDB0062749	5(S),15(R)-DiHETE					C20H32O4	+NH4	354.264	0.99761	0.633765	0.98506	0.622805
189	189-1	HMDB0015562	Isopropamide	Benzenoids	Benzene and substituted derivatives	Diphenylmethanes	C07055	C23H33N2O	+H	354.267	0.99759	0.806806	0.959885	0.772575
190	190-1	HMDB0001984	Finasteride	Lipids and lipid-like molecules	Steroids and steroid derivatives	Androstane steroids		C23H36N2O2	-H2O+H	355.274	0.997931	0.597275	0.939527	0.559995
191	191-1	HMDB0000944	Behenic acid	Lipids and lipid-like molecules	Fatty Acyls	Fatty acids and conjugates	C08281	C22H44O2	+NH4	358.368	0.99807	0.562882	0.975292	0.547915
191	191-2	HMDB0035651	6-Hydroxy-8-docosanone	Lipids and lipid-like molecules	Fatty Acyls	Fatty alcohols		C22H44O2	+NH4	358.368	0.99807	0.562882	0.975292	0.547915
191	191-3	HMDB0035655	8-Hydroxy-6-docosanone	Lipids and lipid-like molecules	Fatty Acyls	Fatty alcohols		C22H44O2	+NH4	358.368	0.99807	0.562882	0.975292	0.547915
191	191-4	HMDB0035660	5-Hydroxy-7-docosanone	Lipids and lipid-like molecules	Fatty Acyls	Fatty alcohols		C22H44O2	+NH4	358.368	0.99807	0.562882	0.975292	0.547915
191	191-5	HMDB0035667	4-Hydroxy-6-docosanone	Lipids and lipid-like molecules	Fatty Acyls	Fatty alcohols		C22H44O2	+NH4	358.368	0.99807	0.562882	0.975292	0.547915
191	191-6	HMDB0040290	Butyl octadecanoate	Lipids and lipid-like molecules	Fatty Acyls	Fatty acid esters		C22H44O2	+NH4	358.368	0.99807	0.562882	0.975292	0.547915
192	192-1	HMDB0011131	MG(18:0)	Lipids and lipid-like molecules	Glycerolipids	Monoradylglycerols		C21H42O4	+H	359.316	0.996584	0.949637	0.996587	0.943162
193	193-1	HMDB0001908	19-Hydroxy-PGE2	Lipids and lipid-like molecules	Fatty Acyls	Eicosanoids		C20H32O6	+H	369.227	0.998008	0.57656	0.525143	0.302173
193	193-2	HMDB0001979	6,15-Diketo,13,14-dihydro-PGF1a	Lipids and lipid-like molecules	Fatty Acyls	Eicosanoids		C20H32O6	+H	369.227	0.998008	0.57656	0.525143	0.302173
193	193-3	HMDB0003247	20-Hydroxy-PGE2	Lipids and lipid-like molecules	Fatty Acyls	Eicosanoids		C20H32O6	+H	369.227	0.998008	0.57656	0.525143	0.302173
193	193-4	HMDB0004241	6-Ketoprostaglandin E1	Lipids and lipid-like molecules	Fatty Acyls	Eicosanoids	C05962	C20H32O6	+H	369.227	0.998008	0.57656	0.525143	0.302173
193	193-5	HMDB0005099	Thromboxane B3	Lipids and lipid-like molecules	Fatty Acyls	Eicosanoids		C20H32O6	+H	369.227	0.998008	0.57656	0.525143	0.302173
193	193-6	HMDB0012110	5(6)-Epoxy Prostaglandin E1	Lipids and lipid-like molecules	Fatty Acyls	Eicosanoids	C04741	C20H32O6	+H	369.227	0.998008	0.57656	0.525143	0.302173
193	193-7	HMDB0012633	20-COOH-10,11-dihydro-LTB4	Lipids and lipid-like molecules	Fatty Acyls	Fatty acids and conjugates		C20H32O6	+H	369.227	0.998008	0.57656	0.525143	0.302173
193	193-8	HMDB0012635	20-dihydroxyleukotriene B4	Lipids and lipid-like molecules	Fatty Acyls	Eicosanoids		C20H32O6	+H	369.227	0.998008	0.57656	0.525143	0.302173
193	193-9	HMDB0062748	20-hydroxylipoxin A4	Lipids and lipid-like molecules	Fatty Acyls	Eicosanoids		C20H32O6	+H	369.227	0.998008	0.57656	0.525143	0.302173
194	194-1	HMDB0014920	Propantheline	Organoheterocyclic compounds	Benzopyrans	1-benzopyrans	C07506	C23H30NO3	+H	369.23	0.997853	0.743291	0.507774	0.376613
195	195-1	HMDB0014708	Cinnarizine	Benzenoids	Benzene and substituted derivatives	Diphenylmethanes		C26H28N2	+H	369.233	0.99821	0.96426	0.833129	0.801915
196	196-1	HMDB0014928	Perindopril	Organic acids and derivatives	Carboxylic acids and derivatives	Amino acids, peptides, and analogues	C07706	C19H32N2O5	+H	369.238	0.998125	0.944206	0.994894	0.937623
197	197-1	HMDB0031465	Methyl-[10]-shogaol	Benzenoids	Benzene and substituted derivatives	Methoxybenzenes		C22H34O3	+Na	369.24	0.997971	0.967448	0.985465	0.951452
197	197-2	HMDB0034944	Siderol	Lipids and lipid-like molecules	Prenol lipids	Diterpenoids		C22H34O3	+Na	369.24	0.997971	0.967448	0.985465	0.951452
197	197-3	HMDB0036722	ent-17-Acetoxy-16b-kauran-19-al	Lipids and lipid-like molecules	Prenol lipids	Diterpenoids		C22H34O3	+Na	369.24	0.997971	0.967448	0.985465	0.951452
197	197-4	HMDB0041001	Volemolide	Lipids and lipid-like molecules	Prenol lipids	Terpene lactones		C22H34O3	+Na	369.24	0.997971	0.967448	0.985465	0.951452
198	198-1	HMDB0000385	12a-Hydroxy-3-oxocholadienic acid	Lipids and lipid-like molecules	Steroids and steroid derivatives	Bile acids, alcohols and derivatives		C24H34O4	-H2O+H	369.242	0.997922	0.913814	0.979009	0.892774
198	198-2	HMDB0012867	9'-Carboxy-alpha-tocotrienol	Lipids and lipid-like molecules	Prenol lipids	Monoterpenoids		C24H34O4	-H2O+H	369.242	0.997922	0.913814	0.979009	0.892774
199	199-1	HMDB0060061	Sphingosine 1-phosphate (d16:1-P)	Organic acids and derivatives	Organic phosphoric acids and derivatives	Phosphate esters		C16H34NO5P	+NH4	369.251	0.998273	0.549311	0.960033	0.526445
200	200-1	HMDB0015092	Norgestimate	Lipids and lipid-like molecules	Steroids and steroid derivatives	Steroid esters		C23H31NO3	+H	370.238	0.998054	0.836383	0.821272	0.685561
201	201-1	HMDB0002226	Adrenic acid	Lipids and lipid-like molecules	Fatty Acyls	Fatty acids and conjugates	C16527	C22H36O2	+K	371.235	0.998048	0.535708	0.959026	0.512755
201	201-2	HMDB0035676	1-Hydroxy-1-phenyl-3-hexadecanone	Lipids and lipid-like molecules	Fatty Acyls	Fatty alcohols		C22H36O2	+K	371.235	0.998048	0.535708	0.959026	0.512755
201	201-3	HMDB0035677	3-Hydroxy-1-phenyl-1-hexadecanone	Lipids and lipid-like molecules	Fatty Acyls	Fatty alcohols		C22H36O2	+K	371.235	0.998048	0.535708	0.959026	0.512755
201	201-4	HMDB0062725	Ethyl Arachidonate	Lipids and lipid-like molecules	Fatty Acyls	Fatty acid esters		C22H36O2	+K	371.235	0.998048	0.535708	0.959026	0.512755
202	202-1	HMDB0002886	6-Keto-prostaglandin F1a	Lipids and lipid-like molecules	Fatty Acyls	Eicosanoids	C05961	C20H34O6	+H	371.243	0.998187	0.647182	0.992064	0.640881
202	202-2	HMDB0003252	Thromboxane B2	Lipids and lipid-like molecules	Fatty Acyls	Eicosanoids	C05963	C20H34O6	+H	371.243	0.998187	0.647182	0.992064	0.640881
202	202-3	HMDB0004049	20-Hydroxy-PGF2a	Lipids and lipid-like molecules	Fatty Acyls	Eicosanoids		C20H34O6	+H	371.243	0.998187	0.647182	0.992064	0.640881
202	202-4	HMDB0012502	10,11-dihydro-20-dihydroxy-LTB4	Lipids and lipid-like molecules	Fatty Acyls	Eicosanoids		C20H34O6	+H	371.243	0.998187	0.647182	0.992064	0.640881
202	202-5	HMDB0013039	Prostaglandin G1	Lipids and lipid-like molecules	Fatty Acyls	Eicosanoids		C20H34O6	+H	371.243	0.998187	0.647182	0.992064	0.640881
203	203-1	HMDB0014364	Oxyphenonium	Benzenoids	Benzene and substituted derivatives			C21H34NO3	+Na	371.243	0.9978	0.582654	0.987782	0.574269
204	204-1	HMDB0014392	Methysergide	Alkaloids and derivatives	Ergoline and derivatives	Lysergic acids and derivatives	C07199	C21H27N3O2	+NH4	371.244	0.998368	0.591384	0.975418	0.575905
205	205-1	HMDB0011550	MG(20:5)	Lipids and lipid-like molecules	Endocannabinoids			C23H36O4	+H	377.269	0.996433	0.830977	0.963155	0.797505
205	205-2	HMDB0012868	9'-Carboxy-gamma-chromanol	Organoheterocyclic compounds	Benzopyrans	1-benzopyrans		C23H36O4	+H	377.269	0.996433	0.830977	0.963155	0.797505
206	206-1	HMDB0001160	Tricosanoic acid	Lipids and lipid-like molecules	Fatty Acyls	Fatty acids and conjugates		C23H46O2	+Na	377.339	0.996677	0.634919	0.960834	0.608024
206	206-2	HMDB0035638	6-Hydroxy-8-tricosanone	Lipids and lipid-like molecules	Fatty Acyls	Fatty alcohols		C23H46O2	+Na	377.339	0.996677	0.634919	0.960834	0.608024
206	206-3	HMDB0035642	8-Hydroxy-6-tricosanone	Lipids and lipid-like molecules	Fatty Acyls	Fatty alcohols		C23H46O2	+Na	377.339	0.996677	0.634919	0.960834	0.608024
206	206-4	HMDB0035649	4-Hydroxy-6-tricosanone	Lipids and lipid-like molecules	Fatty Acyls	Fatty alcohols		C23H46O2	+Na	377.339	0.996677	0.634919	0.960834	0.608024
206	206-5	HMDB0035650	6-Hydroxy-4-tricosanone	Lipids and lipid-like molecules	Fatty Acyls	Fatty alcohols		C23H46O2	+Na	377.339	0.996677	0.634919	0.960834	0.608024
207	207-1	HMDB0030956	5-Nonadecyl-1,3-benzenediol	Benzenoids	Phenols	Benzenediols		C25H44O2	+H	377.341	0.996799	0.68614	0.938557	0.641921
208	208-1	HMDB0011536	MG(18:1)	Lipids and lipid-like molecules	Glycerolipids	Monoradylglycerols		C21H40O4	+Na	379.282	0.997227	0.662064	0.584296	0.385769
208	208-2	HMDB0033372	Stearoyllactic acid	Lipids and lipid-like molecules	Fatty Acyls	Fatty acid esters		C21H40O4	+Na	379.282	0.997227	0.662064	0.584296	0.385769
208	208-3	HMDB0034031	3-(2-Heptenyloxy)-2-hydroxypropyl undecanoate	Lipids and lipid-like molecules	Glycerolipids	Diradylglycerols		C21H40O4	+Na	379.282	0.997227	0.662064	0.584296	0.385769
209	209-1	HMDB0042020	Talinolol	Benzenoids	Benzene and substituted derivatives	N-phenylureas		C20H33N3O3	+NH4	381.286	0.997361	0.633166	0.953039	0.601839
210	210-1	HMDB0011545	MG(20:3)	Lipids and lipid-like molecules	Endocannabinoids			C23H40O4	+H	381.3	0.997366	0.83213	0.983293	0.816073
210	210-2	HMDB0032735	Isopersin	Lipids and lipid-like molecules	Fatty Acyls	Fatty alcohols		C23H40O4	+H	381.3	0.997366	0.83213	0.983293	0.816073
210	210-3	HMDB0039403	2-Hydroxy-4-oxo-5,12-heneicosadien-1-yl acetate	Lipids and lipid-like molecules	Fatty Acyls	Fatty alcohols		C23H40O4	+H	381.3	0.997366	0.83213	0.983293	0.816073
210	210-4	HMDB0041103	Persin	Lipids and lipid-like molecules	Fatty Acyls	Fatty alcohols		C23H40O4	+H	381.3	0.997366	0.83213	0.983293	0.816073
211	211-1	HMDB0240592	Palmitoylcholine	Organic nitrogen compounds	Organonitrogen compounds	Quaternary ammonium salts		C21H44NO2	+K	381.3	0.997898	0.868908	0.980616	0.850273
212	212-1	HMDB0036803	6-O-Acetylaustroinulin	Lipids and lipid-like molecules	Prenol lipids	Diterpenoids		C22H36O4	+NH4	382.295	0.997532	0.667559	0.971853	0.647167
212	212-2	HMDB0036804	7-O-Acetylaustroinulin	Lipids and lipid-like molecules	Prenol lipids	Diterpenoids		C22H36O4	+NH4	382.295	0.997532	0.667559	0.971853	0.647167
213	213-1	HMDB0035516	5-Decanoyl-2-nonylpyridine	Organic oxygen compounds	Organooxygen compounds	Carbonyl compounds		C24H41NO	+Na	382.308	0.997319	0.725053	0.944905	0.68327
214	214-1	HMDB0013327	Dodecanedioylcarnitine	Organic acids and derivatives	Carboxylic acids and derivatives	Tricarboxylic acids and derivatives		C19H35NO6	+NH4	391.28	0.997818	0.646203	0.989427	0.637975
215	215-1	HMDB0038073	Octadecyl fumarate	Lipids and lipid-like molecules	Fatty Acyls	Fatty acid esters		C22H40O4	+Na	391.282	0.997757	0.651399	0.97873	0.636114
216	216-1	HMDB0000328	12-Ketodeoxycholic acid	Lipids and lipid-like molecules	Steroids and steroid derivatives	Bile acids, alcohols and derivatives		C24H38O4	+H	391.284	0.997651	0.647417	0.969764	0.626367
216	216-2	HMDB0000460	7-Hydroxy-3-oxocholanoic acid	Lipids and lipid-like molecules	Steroids and steroid derivatives	Bile acids, alcohols and derivatives		C24H38O4	+H	391.284	0.997651	0.647417	0.969764	0.626367
216	216-3	HMDB0000467	Nutriacholic acid	Lipids and lipid-like molecules	Steroids and steroid derivatives	Bile acids, alcohols and derivatives		C24H38O4	+H	391.284	0.997651	0.647417	0.969764	0.626367
216	216-4	HMDB0000503	7alpha-Hydroxy-3-oxo-5beta-cholan-24-oic acid	Lipids and lipid-like molecules	Steroids and steroid derivatives	Bile acids, alcohols and derivatives		C24H38O4	+H	391.284	0.997651	0.647417	0.969764	0.626367
216	216-5	HMDB0062742	12alpha-hydroxy-3-oxo-5beta-cholan-24-oic Acid	Lipids and lipid-like molecules	Steroids and steroid derivatives	Bile acids, alcohols and derivatives		C24H38O4	+H	391.284	0.997651	0.647417	0.969764	0.626367
217	217-1	HMDB0000476	3-Oxo-4,6-choladienoic acid	Lipids and lipid-like molecules	Steroids and steroid derivatives	Bile acids, alcohols and derivatives		C24H34O3	+Na	393.24	0.996842	0.889778	0.980374	0.86956
218	218-1	HMDB0007003	CPA(16:0)	Lipids and lipid-like molecules	Glycerophospholipids	Glycerophosphates		C19H37O6P	+H	393.24	0.996851	0.862499	0.993786	0.85444
219	219-1	HMDB0011538	MG(18:2)	Lipids and lipid-like molecules	Fatty Acyls	Lineolic acids and derivatives		C21H38O4	+K	393.24	0.996844	0.802586	0.988862	0.791142
220	220-1	HMDB0031977	Methyl (9Z)-6'-oxo-6,5'-diapo-6-carotenoate	Lipids and lipid-like molecules	Prenol lipids	Diterpenoids		C26H32O3	+H	393.242	0.996804	0.888559	0.965471	0.855136
221	221-1	HMDB0003752	LysoPC(10:0)	Lipids and lipid-like molecules	Glycerophospholipids	Glycerophosphocholines		C18H38NO7P	-H2O+H	394.235	0.995428	0.556518	0.616394	0.341466
222	222-1	HMDB0038618	Acidissiminol	Lipids and lipid-like molecules	Prenol lipids	Monoterpenoids		C25H31NO3	+H	394.238	0.99715	0.558132	0.883836	0.491892
223	223-1	HMDB0014469	Fluorometholone	Lipids and lipid-like molecules	Steroids and steroid derivatives	Pregnane steroids		C22H29FO4	+NH4	394.239	0.996268	0.617762	0.956254	0.588533
223	223-2	HMDB0014687	Desoximetasone	Lipids and lipid-like molecules	Steroids and steroid derivatives	Hydroxysteroids		C22H29FO4	+NH4	394.239	0.996268	0.617762	0.956254	0.588533
224	224-1	HMDB0013627	Cervonoyl ethanolamide	Lipids and lipid-like molecules	Fatty Acyls	Fatty acid esters	C13828	C24H36O3	+Na	395.256	0.997055	0.63895	0.518203	0.330131
225	225-1	HMDB0011154	LysoPA(P-16:0/0:0)	Lipids and lipid-like molecules	Glycerophospholipids	Glycerophosphates	C15646	C19H39O6P	+H	395.256	0.997118	0.650553	0.652096	0.423
226	226-1	HMDB0039883	Ascorbyl palmitate	Lipids and lipid-like molecules	Fatty Acyls	Fatty acid esters		C22H38O7	-H2O+H	397.259	0.997821	0.567981	0.505939	0.286738
227	227-1	HMDB0000308	3b-Hydroxy-5-cholenoic acid	Lipids and lipid-like molecules	Steroids and steroid derivatives	Bile acids, alcohols and derivatives		C24H38O3	+Na	397.271	0.99774	0.909734	0.980385	0.889874
228	228-1	HMDB0062325	1-hexadecyl-glycero-3-phosphate	Lipids and lipid-like molecules	Glycerophospholipids	Glycerophosphates		C19H41O6P	+H	397.271	0.997782	0.91488	0.99316	0.906607
229	229-1	HMDB0012516	11'-Carboxy-alpha-tocotrienol	Lipids and lipid-like molecules	Prenol lipids	Sesquiterpenoids		C26H38O4	-H2O+H	397.274	0.997919	0.795871	0.975726	0.774935
229	229-2	HMDB0030041	Lupulone	Organic oxygen compounds	Organooxygen compounds	Carbonyl compounds	C10706	C26H38O4	-H2O+H	397.274	0.997919	0.795871	0.975726	0.774935
229	229-3	HMDB0030140	Adlupulone	Organic oxygen compounds	Organooxygen compounds	Carbonyl compounds		C26H38O4	-H2O+H	397.274	0.997919	0.795871	0.975726	0.774935
230	230-1	HMDB0012280	Phytosphingosine-1-P	Lipids and lipid-like molecules	Sphingolipids	Phosphosphingolipids		C18H40NO6P	+H	398.267	0.997824	0.539931	0.663067	0.357232
231	231-1	HMDB0015073	Salmeterol	Benzenoids	Benzene and substituted derivatives	Benzyl alcohols	C07241	C25H37NO4	-H2O+H	398.269	0.998108	0.808286	0.938793	0.757378
232	232-1	HMDB0036887	10'-Apo-beta-caroten-10'-al	Lipids and lipid-like molecules	Prenol lipids	Sesterterpenoids		C27H36O	+Na	399.266	0.99792	0.59563	0.96857	0.57571
232	232-2	HMDB0059605	10'-Apo-beta-carotenal	Lipids and lipid-like molecules	Prenol lipids	Sesterterpenoids		C27H36O	+Na	399.266	0.99792	0.59563	0.96857	0.57571
233	233-1	HMDB0012518	11'-Carboxy-gamma-tocotrienol	Lipids and lipid-like molecules	Prenol lipids	Sesquiterpenoids		C25H36O4	+H	401.269	0.995242	0.512719	0.741239	0.378239
233	233-2	HMDB0030065	Colupulone	Organic oxygen compounds	Organooxygen compounds	Carbonyl compounds		C25H36O4	+H	401.269	0.995242	0.512719	0.741239	0.378239
234	234-1	HMDB0030057	Boviquinone 4	Lipids and lipid-like molecules	Prenol lipids	Diterpenoids		C26H36O4	+H	413.269	0.998562	0.518604	0.971389	0.503042
235	235-1	HMDB0240233	Mizolastine	Organoheterocyclic compounds	Benzimidazoles			C24H25FN6O	-H2O+H	415.204	0.997424	0.720541	0.955122	0.686431
236	236-1	HMDB0034662	Dihydrofukinolide	Lipids and lipid-like molecules	Prenol lipids	Terpene lactones		C22H32O6	+Na	415.209	0.997228	0.730765	0.977361	0.712242
237	237-1	HMDB0038787	Melleolide B	Lipids and lipid-like molecules	Prenol lipids	Sesquiterpenoids		C24H32O7	-H2O+H	415.212	0.997257	0.736759	0.964188	0.708425
237	237-2	HMDB0038793	Melleolide G	Lipids and lipid-like molecules	Prenol lipids	Sesquiterpenoids		C24H32O7	-H2O+H	415.212	0.997257	0.736759	0.964188	0.708425
238	238-1	HMDB0014354	Trospium	Benzenoids	Benzene and substituted derivatives	Diphenylmethanes		C25H30NO3	+Na	415.212	0.997359	0.743603	0.963275	0.714402
239	239-1	HMDB0014324	Ramipril	Organic acids and derivatives	Carboxylic acids and derivatives	Amino acids, peptides, and analogues		C23H32N2O5	+H	417.238	0.995349	0.577891	0.95801	0.551051
240	240-1	HMDB0007007	CPA(18:2)	Lipids and lipid-like molecules	Fatty Acyls	Lineolic acids and derivatives		C21H37O6P	+H	417.24	0.995161	0.591316	0.957274	0.563313
241	241-1	HMDB0004666	MG(20:4)	Lipids and lipid-like molecules	Endocannabinoids		C13856	C23H38O4	+K	417.24	0.995668	0.581643	0.931289	0.539331
241	241-2	HMDB0035273	1-Acetoxy-2-hydroxy-5,12,15-heneicosatrien-4-one	Lipids and lipid-like molecules	Fatty Acyls	Fatty alcohols		C23H38O4	+K	417.24	0.995668	0.581643	0.931289	0.539331
241	241-3	HMDB0036568	Persenone A	Lipids and lipid-like molecules	Fatty Acyls	Fatty alcohols		C23H38O4	+K	417.24	0.995668	0.581643	0.931289	0.539331
242	242-1	HMDB0062318	1-heptadecanoyl-glycero-3-phosphate	Lipids and lipid-like molecules	Glycerophospholipids	Glycerophosphates		C20H41O7P	+H	425.266	0.995328	0.650888	0.971534	0.629405
243	243-1	HMDB0032601	Muzanzagenin	Lipids and lipid-like molecules	Steroids and steroid derivatives	Oxosteroids		C27H38O5	-H2O+H	425.269	0.995153	0.683104	0.934923	0.635554
244	244-1	HMDB0040118	(all-E)-6'-Apo-y-caroten-6'-al	Lipids and lipid-like molecules	Prenol lipids	Triterpenoids		C32H42O	-H2O+H	425.32	0.997575	0.550881	0.93499	0.51382
245	245-1	HMDB0059931	2,3-Diacetoxypropyl stearate	Lipids and lipid-like molecules	Glycerolipids	Triradylcglycerols		C25H46O6	-H2O+H	425.326	0.997606	0.575611	0.95247	0.546939
246	246-1	HMDB0015172	Carphenazine	Organoheterocyclic compounds	Benzothiazines	Phenothiazines		C23H29N3O2S	+NH4	429.232	0.998669	0.572064	0.962688	0.549986
246	246-2	HMDB0015196	Acetophenazine	Organoheterocyclic compounds	Benzothiazines	Phenothiazines	C06807	C23H29N3O2S	+NH4	429.232	0.998669	0.572064	0.962688	0.549986
247	247-1	HMDB0015163	Irbesartan	Benzenoids	Benzene and substituted derivatives	Biphenyls and derivatives	C07469	C25H28N6O	+H	429.24	0.998875	0.636818	0.980982	0.624004
248	248-1	HMDB0015119	Nandrolone phenpropionate	Lipids and lipid-like molecules	Steroids and steroid derivatives	Steroid esters	C08155	C27H34O3	+Na	429.24	0.998874	0.625855	0.973053	0.608305
249	249-1	HMDB0039857	Cadabicine methyl ether	Phenylpropanoids and polyketides	Flavonoids	Flavonoid glycosides		C26H31N3O4	-H2O+H	432.228	0.996641	0.502195	0.687032	0.343865
250	250-1	HMDB0015704	Tafluprost	Lipids and lipid-like molecules	Fatty Acyls	Eicosanoids		C25H34F2O5	-H2O+H	435.234	0.998635	0.595855	0.647636	0.38537
251	251-1	HMDB0015213	Diphenoxylate	Benzenoids	Benzene and substituted derivatives	Diphenylacetonitriles	C07872	C30H32N2O2	-H2O+H	435.243	0.998505	0.585483	0.819436	0.479049
252	252-1	HMDB0015013	Flupenthixol	Organoheterocyclic compounds	Benzothiopyrans	1-benzothiopyrans		C23H27F3N2OS	+H	437.187	0.997742	0.571132	0.959983	0.547039
253	253-1	HMDB0030849	Artocarpin	Phenylpropanoids and polyketides	Flavonoids	Flavones		C26H28O6	+H	437.196	0.997645	0.663111	0.964526	0.638082
254	254-1	HMDB0039214	Butyl (S)-3-hydroxybutyrate [arabinosyl-(1->6)-glucoside]	Lipids and lipid-like molecules	Fatty Acyls	Fatty acyl glycosides		C19H34O12	-H2O+H	437.202	0.997947	0.577463	0.988492	0.569646
255	255-1	HMDB0002504	3-Sulfodeoxycholic acid	Lipids and lipid-like molecules	Sphingolipids	Ceramides		C23H38O7S	-H2O+H	441.231	0.995576	0.587833	0.830869	0.486252
256	256-1	HMDB0007005	CPA(18:1)	Lipids and lipid-like molecules	Glycerophospholipids	Glycerophosphates		C21H39O6P	+Na	441.238	0.996094	0.747609	0.982276	0.73149
257	257-1	HMDB0062312	1-(5Z,8Z,11Z,14Z-eicosatetraenoyl)-sn-glycero-3-phosphate	Lipids and lipid-like molecules	Glycerophospholipids	Glycerophosphates		C23H39O7P	-H2O+H	441.24	0.996003	0.777344	0.975974	0.755635
258	258-1	HMDB0000541	7b-Hydroxy-3-oxo-5b-cholanoic acid	Lipids and lipid-like molecules	Steroids and steroid derivatives	Bile acids, alcohols and derivatives		C25H38O4	+K	441.24	0.995991	0.715098	0.967948	0.689403
258	258-2	HMDB0011557	MG(22:6)	Lipids and lipid-like molecules	Glycerolipids	Monoradylglycerols		C25H38O4	+K	441.24	0.995991	0.715098	0.967948	0.689403
259	259-1	HMDB0014913	Tirofiban	Organic acids and derivatives	Carboxylic acids and derivatives	Amino acids, peptides, and analogues	C07965	C22H36N2O5S	+H	441.242	0.99586	0.729415	0.956095	0.694502
260	260-1	HMDB0014775	Astemizole	Organoheterocyclic compounds	Benzimidazoles		C06832	C28H31FN4O	-H2O+H	441.245	0.995917	0.765819	0.864936	0.65968
261	261-1	HMDB0036122	[6]-Gingerdiol 4'-O-beta-D-glucopyranoside	Organic oxygen compounds	Organooxygen compounds	Carbohydrates and carbohydrate conjugates		C23H38O9	-H2O+H	441.248	0.995956	0.651042	0.542398	0.351696
261	261-2	HMDB0036123	[6]-Gingerdiol 5-O-beta-D-glucopyranoside	Lipids and lipid-like molecules	Fatty Acyls	Fatty acyl glycosides		C23H38O9	-H2O+H	441.248	0.995956	0.651042	0.542398	0.351696
262	262-1	HMDB0034492	Dihydrovaltrate	Lipids and lipid-like molecules	Prenol lipids	Monoterpenoids		C22H32O8	+NH4	442.244	0.993751	0.756043	0.994095	0.746882
262	262-2	HMDB0039013	8beta-Angeloyloxy-15-hydroxy-1alpha,10R-dimethoxy-3-oxo-11(13)-germacren-12,6alpha-olide	Lipids and lipid-like molecules	Prenol lipids	Terpene lactones		C22H32O8	+NH4	442.244	0.993751	0.756043	0.994095	0.746882
263	263-1	HMDB0007004	CPA(18:0)	Lipids and lipid-like molecules	Glycerophospholipids	Glycerophosphates		C21H41O6P	+Na	443.253	0.994903	0.602921	0.968138	0.580735
264	264-1	HMDB0062313	1-(8Z,11Z,14Z-eicosatrienoyl)-glycero-3-phosphate	Lipids and lipid-like molecules	Glycerophospholipids	Glycerophosphates		C23H41O7P	-H2O+H	443.256	0.994974	0.621903	0.958621	0.593173
265	265-1	HMDB0011555	MG(22:5)	Lipids and lipid-like molecules	Glycerolipids	Monoradylglycerols		C25H40O4	+K	443.256	0.994483	0.624692	0.944235	0.586602
265	265-2	HMDB0012517	11'-Carboxy-gamma-chromanol	Lipids and lipid-like molecules	Prenol lipids	Sesquiterpenoids		C25H40O4	+K	443.256	0.994483	0.624692	0.944235	0.586602
266	266-1	HMDB0094682	5alpha-Androstan-3alpha,17beta-diol disulfate	Lipids and lipid-like molecules	Steroids and steroid derivatives	Sulfated steroids		C19H32O8S2	+H	453.161	0.998029	0.577755	0.967063	0.557625
266	266-2	HMDB0240625	5alpha-Androstan-3beta,17alpha-diol disulfate	Lipids and lipid-like molecules	Steroids and steroid derivatives	Sulfated steroids		C19H32O8S2	+H	453.161	0.998029	0.577755	0.967063	0.557625
267	267-1	HMDB0061104	7-hydroxymethotrexate	Organoheterocyclic compounds	Pteridines and derivatives	Pterins and derivatives		C20H22N8O6	-H2O+H	453.163	0.998029	0.616873	0.995771	0.613054
268	268-1	HMDB0030404	Armillaripin	Lipids and lipid-like molecules	Prenol lipids	Sesquiterpenoids		C24H30O6	+K	453.167	0.997992	0.640494	0.975164	0.623333
268	268-2	HMDB0037039	4-O-Methylmelleolide	Lipids and lipid-like molecules	Prenol lipids	Sesquiterpenoids		C24H30O6	+K	453.167	0.997992	0.640494	0.975164	0.623333
268	268-3	HMDB0039380	Armillarin	Lipids and lipid-like molecules	Prenol lipids	Sesquiterpenoids		C24H30O6	+K	453.167	0.997992	0.640494	0.975164	0.623333
269	269-1	HMDB0035068	Melleolide M	Lipids and lipid-like molecules	Prenol lipids	Sesquiterpenoids		C23H29ClO7	+H	453.167	0.99839	0.545541	0.900409	0.490419
270	270-1	HMDB0032622	Phenethyl rutinoside	Organic oxygen compounds	Organooxygen compounds	Carbohydrates and carbohydrate conjugates		C20H30O10	+Na	453.173	0.997916	0.64603	0.984164	0.634474
271	271-1	HMDB0011152	LysoPE(P-16:0/0:0)	Lipids and lipid-like molecules	Glycerophospholipids	Glycerophosphoethanolamines		C21H44NO6P	+NH4	455.324	0.998432	0.745159	0.984468	0.732435
272	272-1	HMDB0001492	gamma-Tocopherol	Lipids and lipid-like molecules	Prenol lipids	Quinone and hydroquinone lipids	C02483	C28H48O2	+K	455.329	0.998383	0.680731	0.943535	0.641255
272	272-2	HMDB0006335	beta-Tocopherol	Lipids and lipid-like molecules	Prenol lipids	Quinone and hydroquinone lipids	C14152	C28H48O2	+K	455.329	0.998383	0.680731	0.943535	0.641255
272	272-3	HMDB0012112	(22Alpha)-hydroxy-5alpha-campestan-3-one	Lipids and lipid-like molecules	Glycerolipids	Diradylglycerols		C28H48O2	+K	455.329	0.998383	0.680731	0.943535	0.641255
272	272-4	HMDB0012173	4Alpha-hydroxymethyl-5alpha-cholesta-8-en-3beta-ol	Lipids and lipid-like molecules	Steroids and steroid derivatives	Cholestane steroids		C28H48O2	+K	455.329	0.998383	0.680731	0.943535	0.641255
272	272-5	HMDB0034253	z2-Tocopherol	Lipids and lipid-like molecules	Prenol lipids	Diterpenoids		C28H48O2	+K	455.329	0.998383	0.680731	0.943535	0.641255
272	272-6	HMDB0034401	Cyclostenol	Lipids and lipid-like molecules	Steroids and steroid derivatives	Hydroxysteroids		C28H48O2	+K	455.329	0.998383	0.680731	0.943535	0.641255
273	273-1	HMDB0031381	Methyl (7Z,9Z,9'Z)-6'-apo-y-caroten-6'-oate	Lipids and lipid-like molecules	Prenol lipids	Triterpenoids		C33H44O2	-H2O+H	455.331	0.998314	0.814455	0.939398	0.763808
273	273-2	HMDB0036882	Reticulataxanthin	Lipids and lipid-like molecules	Prenol lipids	Triterpenoids		C33H44O2	-H2O+H	455.331	0.998314	0.814455	0.939398	0.763808
274	274-1	HMDB0002157	27-Norcholestanehexol	Lipids and lipid-like molecules	Steroids and steroid derivatives	Bile acids, alcohols and derivatives		C26H46O6	+H	455.337	0.998394	0.812398	0.964462	0.782269
275	275-1	HMDB0060769	4-Hydroxyphenytoin glucuronide	Organoheterocyclic compounds	Azolidines	Imidazolidines		C21H20N2O9	+K	483.08	0.997542	0.552888	0.946145	0.521826
276	276-1	HMDB0011489	LysoPE(20:5)	Lipids and lipid-like molecules	Glycerophospholipids	Glycerophosphoethanolamines		C25H42NO7P	+NH4	517.304	0.998259	0.6676	0.976291	0.650637
277	277-1	HMDB0034695	Cucurbitacin D	Lipids and lipid-like molecules	Steroids and steroid derivatives	Cucurbitacins	C08796	C30H44O7	+H	517.316	0.998306	0.627041	0.959075	0.600361
277	277-2	HMDB0034931	Ganoderic acid A	Lipids and lipid-like molecules	Prenol lipids	Triterpenoids		C30H44O7	+H	517.316	0.998306	0.627041	0.959075	0.600361
277	277-3	HMDB0036306	Ganoderic acid delta	Lipids and lipid-like molecules	Prenol lipids	Triterpenoids		C30H44O7	+H	517.316	0.998306	0.627041	0.959075	0.600361
278	278-1	HMDB0038029	Eriojaposide B	Lipids and lipid-like molecules	Fatty Acyls	Fatty acyl glycosides		C25H40O11	+NH4	534.291	0.995119	0.57062	0.959963	0.5451
279	279-1	HMDB0038008	Malvidin 3-(6-acetylglucoside)	Phenylpropanoids and polyketides	Flavonoids	Flavonoid glycosides		C25H27O13	+H	536.153	0.997881	0.550465	0.526329	0.289112
280	280-1	HMDB0038599	Acrimarine H	Organoheterocyclic compounds	Quinolines and derivatives	Benzoquinolines		C30H27NO7	+Na	536.168	0.997128	0.667882	0.991612	0.660378
281	281-1	HMDB0036592	Validamycin A	Organic oxygen compounds	Organooxygen compounds	Carbohydrates and carbohydrate conjugates	C12112	C20H35NO13	+K	536.174	0.997374	0.626028	0.96279	0.60115
282	282-1	HMDB0035310	Ganoderic acid I	Lipids and lipid-like molecules	Prenol lipids	Triterpenoids		C30H44O8	+NH4	550.337	0.99238	0.522747	0.811591	0.421024
282	282-2	HMDB0035985	Ganoderic acid G	Lipids and lipid-like molecules	Prenol lipids	Triterpenoids		C30H44O8	+NH4	550.337	0.99238	0.522747	0.811591	0.421024
282	282-3	HMDB0036309	Ganoderic acid eta	Lipids and lipid-like molecules	Prenol lipids	Triterpenoids		C30H44O8	+NH4	550.337	0.99238	0.522747	0.811591	0.421024
283	283-1	HMDB0037434	6''-Malonylastragalin	Phenylpropanoids and polyketides	Flavonoids	Flavonoid glycosides		C24H22O14	+Na	557.09	0.997758	0.574172	0.894432	0.512406
283	283-2	HMDB0037758	4',5-Dihydroxy-3,3'-dimethoxy-6,7-methylenedioxyflavone 4'-glucuronide	Phenylpropanoids and polyketides	Flavonoids	Flavonoid glycosides		C24H22O14	+Na	557.09	0.997758	0.574172	0.894432	0.512406
283	283-3	HMDB0038266	3,5-Dihydroxy-3',4'-dimethoxy-6,7-methylenedioxyflavone 3-glucuronide	Phenylpropanoids and polyketides	Flavonoids	Flavonoid glycosides		C24H22O14	+Na	557.09	0.997758	0.574172	0.894432	0.512406
283	283-4	HMDB0039247	2'-Hydroxygenistein 7-(6''-malonylglucoside)	Phenylpropanoids and polyketides	Isoflavonoids	Isoflavonoid O-glycosides		C24H22O14	+Na	557.09	0.997758	0.574172	0.894432	0.512406
284	284-1	HMDB0015387	Aliskiren	Organic acids and derivatives	Carboxylic acids and derivatives	Amino acids, peptides, and analogues		C30H53N3O6	+NH4	569.427	0.998256	0.658279	0.980567	0.644361
285	285-1	HMDB0010390	LysoPC(20:0)	Lipids and lipid-like molecules	Glycerophospholipids	Glycerophosphocholines	C04230	C28H58NO7P	+NH4	569.429	0.998257	0.75168	0.981515	0.736499
286	286-1	HMDB0034033	Sabadelin	Lipids and lipid-like molecules	Fatty Acyls	Fatty alcohols		C35H62O3	+K	569.433	0.998281	0.640463	0.965902	0.61756
286	286-2	HMDB0040920	Epoxymurin A	Lipids and lipid-like molecules	Fatty Acyls	Fatty alcohols	C08484	C35H62O3	+K	569.433	0.998281	0.640463	0.965902	0.61756
286	286-3	HMDB0040922	Epoxymurin B	Lipids and lipid-like molecules	Fatty Acyls	Fatty alcohols		C35H62O3	+K	569.433	0.998281	0.640463	0.965902	0.61756
286	286-4	HMDB0040923	Epomuricenin B	Lipids and lipid-like molecules	Fatty Acyls	Fatty alcohols		C35H62O3	+K	569.433	0.998281	0.640463	0.965902	0.61756
287	287-1	HMDB0002198	(3R,3'R,6'R,9-cis)-beta,epsilon-Carotene-3,3'-diol	Lipids and lipid-like molecules	Prenol lipids	Tetraterpenoids		C40H56O2	+H	569.435	0.998001	0.657331	0.933186	0.612186
287	287-2	HMDB0002789	Zeaxanthin	Lipids and lipid-like molecules	Prenol lipids	Tetraterpenoids	C06098	C40H56O2	+H	569.435	0.998001	0.657331	0.933186	0.612186
287	287-3	HMDB0002950	(3R,3'R,6'R,9'-cis)-beta,epsilon-Carotene-3,3'-diol	Lipids and lipid-like molecules	Prenol lipids	Tetraterpenoids		C40H56O2	+H	569.435	0.998001	0.657331	0.933186	0.612186
287	287-4	HMDB0003112	(3R,3'R,13-cis)-beta,beta-Carotene-3,3'-diol	Lipids and lipid-like molecules	Prenol lipids	Tetraterpenoids		C40H56O2	+H	569.435	0.998001	0.657331	0.933186	0.612186
287	287-5	HMDB0003146	(3R,3'R,9-cis)-beta,beta-Carotene-3,3'-diol	Lipids and lipid-like molecules	Prenol lipids	Tetraterpenoids		C40H56O2	+H	569.435	0.998001	0.657331	0.933186	0.612186
287	287-6	HMDB0003233	Lutein	Lipids and lipid-like molecules	Prenol lipids	Tetraterpenoids	C08601	C40H56O2	+H	569.435	0.998001	0.657331	0.933186	0.612186
287	287-7	HMDB0003240	(3R,3'R,15-cis)-beta,beta-Carotene-3,3'-diol	Lipids and lipid-like molecules	Prenol lipids	Tetraterpenoids		C40H56O2	+H	569.435	0.998001	0.657331	0.933186	0.612186
287	287-8	HMDB0003415	(3R,3'S,6'R)-b,e-Carotene-3,3'-diol	Lipids and lipid-like molecules	Prenol lipids	Tetraterpenoids		C40H56O2	+H	569.435	0.998001	0.657331	0.933186	0.612186
287	287-9	HMDB0003451	(3R,3'R,6'R,13-cis)-beta,epsilon-Carotene-3,3'-diol	Lipids and lipid-like molecules	Prenol lipids	Tetraterpenoids		C40H56O2	+H	569.435	0.998001	0.657331	0.933186	0.612186
287	287-10	HMDB0030538	Cryptoxanthin epoxide	Lipids and lipid-like molecules	Prenol lipids	Tetraterpenoids		C40H56O2	+H	569.435	0.998001	0.657331	0.933186	0.612186
287	287-11	HMDB0035316	(5R,5'R,6S,8'R)-Luteochrome	Lipids and lipid-like molecules	Prenol lipids	Tetraterpenoids		C40H56O2	+H	569.435	0.998001	0.657331	0.933186	0.612186
287	287-12	HMDB0035928	beta,beta-Carotene-3,3'-diol	Lipids and lipid-like molecules	Prenol lipids	Tetraterpenoids		C40H56O2	+H	569.435	0.998001	0.657331	0.933186	0.612186
287	287-13	HMDB0036870	Cryptoflavin	Lipids and lipid-like molecules	Prenol lipids	Tetraterpenoids		C40H56O2	+H	569.435	0.998001	0.657331	0.933186	0.612186
287	287-14	HMDB0036877	Aurochrome	Lipids and lipid-like molecules	Prenol lipids	Tetraterpenoids		C40H56O2	+H	569.435	0.998001	0.657331	0.933186	0.612186
287	287-15	HMDB0036919	Lycophyll	Lipids and lipid-like molecules	Prenol lipids	Tetraterpenoids		C40H56O2	+H	569.435	0.998001	0.657331	0.933186	0.612186
287	287-16	HMDB0036922	Isozeaxanthin	Lipids and lipid-like molecules	Prenol lipids	Tetraterpenoids		C40H56O2	+H	569.435	0.998001	0.657331	0.933186	0.612186
287	287-17	HMDB0036923	Cryptocapsin	Lipids and lipid-like molecules	Prenol lipids	Tetraterpenoids		C40H56O2	+H	569.435	0.998001	0.657331	0.933186	0.612186
287	287-18	HMDB0036971	5',6'-Epoxy-5',6'-dihydro-beta,beta-caroten-3-ol	Lipids and lipid-like molecules	Prenol lipids	Tetraterpenoids		C40H56O2	+H	569.435	0.998001	0.657331	0.933186	0.612186
287	287-19	HMDB0039017	Semi-beta-carotenone	Lipids and lipid-like molecules	Prenol lipids	Sesquaterpenoids		C40H56O2	+H	569.435	0.998001	0.657331	0.933186	0.612186
287	287-20	HMDB0040162	(3S,3'S)-beta,beta-Carotene-3,3'-diol	Lipids and lipid-like molecules	Prenol lipids	Tetraterpenoids		C40H56O2	+H	569.435	0.998001	0.657331	0.933186	0.612186
287	287-21	HMDB0112256	Lactucaxanthin	Lipids and lipid-like molecules	Prenol lipids	Tetraterpenoids	C08599	C40H56O2	+H	569.435	0.998001	0.657331	0.933186	0.612186
287	287-22	HMDB0112257	(13Z,13'Z,3R,3'R,6'R)-Lutein	Lipids and lipid-like molecules	Prenol lipids	Tetraterpenoids		C40H56O2	+H	569.435	0.998001	0.657331	0.933186	0.612186
288	288-1	HMDB0036974	Muricin E	Lipids and lipid-like molecules	Fatty Acyls	Fatty alcohols		C33H60O7	+H	569.441	0.998126	0.780889	0.957967	0.746664
288	288-2	HMDB0036975	Muricin D	Lipids and lipid-like molecules	Fatty Acyls	Fatty alcohols		C33H60O7	+H	569.441	0.998126	0.780889	0.957967	0.746664
289	289-1	HMDB0035292	Ganodermic acid P2	Lipids and lipid-like molecules	Prenol lipids	Triterpenoids		C34H50O7	+H	571.363	0.992512	0.517173	0.959618	0.492572
289	289-2	HMDB0035294	Ganoderic acid Mk	Lipids and lipid-like molecules	Prenol lipids	Triterpenoids		C34H50O7	+H	571.363	0.992512	0.517173	0.959618	0.492572
289	289-3	HMDB0035605	3alpha,15alpha-Diacetoxy-(22R)-hydroxylanosta-7,9(11),24-trien-26-oic acid	Lipids and lipid-like molecules	Prenol lipids	Triterpenoids		C34H50O7	+H	571.363	0.992512	0.517173	0.959618	0.492572
290	290-1	HMDB0029513	Myricatin	Phenylpropanoids and polyketides	Flavonoids	Flavans		C22H16O15S	+Na	575.01	0.994553	0.542846	0.650426	0.351158
291	291-1	HMDB0036298	Cyclopassifloic acid E	Lipids and lipid-like molecules	Steroids and steroid derivatives	Cycloartanols and derivatives		C31H52O8	+Na	575.355	0.993193	0.523576	0.891054	0.463359
292	292-1	HMDB0036361	Pipercyclobutanamide B	Organoheterocyclic compounds	Benzodioxoles			C36H40N2O6	-H2O+H	579.285	0.997702	0.674892	0.974836	0.656397
292	292-2	HMDB0040521	Dipiperamide D	Organoheterocyclic compounds	Benzodioxoles			C36H40N2O6	-H2O+H	579.285	0.997702	0.674892	0.974836	0.656397
293	293-1	HMDB0240597	LysoPI(18:2)	Lipids and lipid-like molecules	Glycerophospholipids	Glycerophosphoinositols		C27H49O12P	-H2O+H	579.293	0.997707	0.713147	0.967475	0.68837
294	294-1	HMDB0240272	Fluperamide	Benzenoids	Benzene and substituted derivatives	Diphenylmethanes		C30H32ClF3N2O2	+K	583.174	0.993507	0.526249	0.718232	0.375515
295	295-1	HMDB0010404	LysoPC(22:6)	Lipids and lipid-like molecules	Glycerophospholipids	Glycerophosphocholines	C04230	C30H50NO7P	+NH4	585.366	0.993752	0.645542	0.736705	0.472603
296	296-1	HMDB0006816	3-Hexaprenyl-4-hydroxybenzoic acid	Lipids and lipid-like molecules	Prenol lipids	Polyprenylphenols	C13425	C37H54O3	+K	585.371	0.993204	0.605477	0.865701	0.5206
296	296-2	HMDB0006818	2-Hexaprenyl-6-methoxy-1,4-benzoquinone	Lipids and lipid-like molecules	Prenol lipids	Quinone and hydroquinone lipids	C05803	C37H54O3	+K	585.371	0.993204	0.605477	0.865701	0.5206
296	296-3	HMDB0036283	Campesteryl p-coumarate	Lipids and lipid-like molecules	Steroids and steroid derivatives	Steroid esters		C37H54O3	+K	585.371	0.993204	0.605477	0.865701	0.5206
297	297-1	HMDB0010330	Cholesterol glucuronide	Lipids and lipid-like molecules	Steroids and steroid derivatives	Steroidal glycosides	C03033	C33H54O7	+Na	585.376	0.993663	0.578016	0.899993	0.516914
298	298-1	HMDB0033494	Tetronasin	Lipids and lipid-like molecules	Prenol lipids	Terpene glycosides		C35H54O8	-H2O+H	585.379	0.992442	0.516817	0.945985	0.485206
298	298-2	HMDB0035999	Ganoderic acid Mg	Lipids and lipid-like molecules	Prenol lipids	Triterpenoids		C35H54O8	-H2O+H	585.379	0.992442	0.516817	0.945985	0.485206
299	299-1	HMDB0015416	Fosamprenavir	Benzenoids	Benzene and substituted derivatives	Benzenesulfonamides		C25H36N3O9PS	+H	586.198	0.993968	0.590193	0.727317	0.426668
300	300-1	HMDB0015393	Darunavir	Benzenoids	Benzene and substituted derivatives	Benzenesulfonamides		C27H37N3O7S	+K	586.198	0.994006	0.561151	0.746195	0.416218
301	301-1	HMDB0060511	SN38 glucuronide	Alkaloids and derivatives	Camptothecins		C11376	C28H28N2O11	+NH4	586.203	0.99335	0.574601	0.955035	0.545115
302	302-1	HMDB0030135	Asticolorin C	Organoheterocyclic compounds	Benzopyrans	1-benzopyrans		C33H28O9	+NH4	586.207	0.99304	0.546527	0.922001	0.500392
303	303-1	HMDB0036842	Hydratopyrrhoxanthinol	Lipids and lipid-like molecules	Prenol lipids	Terpene lactones		C37H48O6	+H	589.352	0.99279	0.548549	0.786124	0.428118
304	304-1	HMDB0034391	Agavoside A	Lipids and lipid-like molecules	Steroids and steroid derivatives	Steroidal glycosides		C33H52O9	+H	593.368	0.993004	0.590499	0.637316	0.373702
305	305-1	HMDB0039138	Hericenone C	Lipids and lipid-like molecules	Prenol lipids	Monoterpenoids		C35H54O6	+Na	593.381	0.992372	0.528183	0.873686	0.457946
305	305-2	HMDB0039593	Hericenone F	Organoheterocyclic compounds	Benzopyrans	1-benzopyrans		C35H54O6	+Na	593.381	0.992372	0.528183	0.873686	0.457946
306	306-1	HMDB0035266	Avenestergenin B2	Lipids and lipid-like molecules	Prenol lipids	Triterpenoids		C37H52O6	+H	593.384	0.992377	0.515571	0.829141	0.424222
307	307-1	HMDB0034872	Cheritamine	Organoheterocyclic compounds	Indoles and derivatives	Indoles		C40H68N2O	+H	593.541	0.995677	0.599326	0.966199	0.576565
308	308-1	HMDB0036379	2-Decarboxyphyllocactin	Organic oxygen compounds	Organooxygen compounds	Carbohydrates and carbohydrate conjugates		C26H29N2O14	+H	594.169	0.994727	0.574004	0.840616	0.479972
309	309-1	HMDB0033985	Mulberrofuran S	Phenylpropanoids and polyketides	2-arylbenzofuran flavonoids			C34H24O9	+NH4	594.176	0.995657	0.613722	0.91337	0.558121
310	310-1	HMDB0010344	Vitamin D2 3-glucuronide	Lipids and lipid-like molecules	Steroids and steroid derivatives	Vitamin D and derivatives		C34H52O7	+Na	595.361	0.993624	0.560392	0.588127	0.32748
310	310-2	HMDB0033078	Ganoderic acid W	Lipids and lipid-like molecules	Prenol lipids	Sesterterpenoids		C34H52O7	+Na	595.361	0.993624	0.560392	0.588127	0.32748
310	310-3	HMDB0035329	Ganoderic acid Ma	Lipids and lipid-like molecules	Prenol lipids	Triterpenoids		C34H52O7	+Na	595.361	0.993624	0.560392	0.588127	0.32748
311	311-1	HMDB0015079	Demecarium	Benzenoids	Benzene and substituted derivatives	Phenoxy compounds		C32H52N4O4	+K	595.362	0.993408	0.542928	0.557083	0.300462
312	312-1	HMDB0035606	(24E)-3beta,15alpha,22S-Triacetoxylanosta-7,9(11),24-trien-26-oic acid	Lipids and lipid-like molecules	Prenol lipids	Triterpenoids		C36H52O8	-H2O+H	595.363	0.994455	0.567579	0.666226	0.376039
313	313-1	HMDB0032840	3-Benzoyloxy-6-oxo-12-ursen-28-oic acid	Lipids and lipid-like molecules	Prenol lipids	Triterpenoids		C37H50O5	+Na	597.355	0.992971	0.549755	0.590038	0.322096
313	313-2	HMDB0032894	3-Benzoyloxy-11-oxo-12-ursen-28-oic acid	Lipids and lipid-like molecules	Prenol lipids	Triterpenoids		C37H50O5	+Na	597.355	0.992971	0.549755	0.590038	0.322096
314	314-1	HMDB0004157	Stercobilinogen	Organoheterocyclic compounds	Tetrapyrroles and derivatives	Bilirubins	C05789	C33H48N4O6	+H	597.365	0.992859	0.574	0.76131	0.433871
315	315-1	HMDB0010398	LysoPC(22:0)	Lipids and lipid-like molecules	Glycerophospholipids	Glycerophosphocholines	C04230	C30H62NO7P	+NH4	597.46	0.998197	0.61476	0.945004	0.579903
316	316-1	HMDB0029982	Epomusenin A	Lipids and lipid-like molecules	Fatty Acyls	Fatty alcohols		C37H66O3	+K	597.464	0.998409	0.606876	0.907771	0.550028
316	316-2	HMDB0029983	Epomusenin B	Lipids and lipid-like molecules	Fatty Acyls	Fatty alcohols		C37H66O3	+K	597.464	0.998409	0.606876	0.907771	0.550028
317	317-1	HMDB0031395	Muricatetrocin C	Lipids and lipid-like molecules	Fatty Acyls	Fatty alcohols		C35H64O7	+H	597.473	0.998437	0.639725	0.959203	0.612667
317	317-2	HMDB0032091	Glacin B	Lipids and lipid-like molecules	Fatty Acyls	Fatty alcohols		C35H64O7	+H	597.473	0.998437	0.639725	0.959203	0.612667
317	317-3	HMDB0032092	Glacin A	Lipids and lipid-like molecules	Fatty Acyls	Fatty alcohols		C35H64O7	+H	597.473	0.998437	0.639725	0.959203	0.612667
317	317-4	HMDB0033327	Annonacin	Lipids and lipid-like molecules	Fatty Acyls	Fatty alcohols		C35H64O7	+H	597.473	0.998437	0.639725	0.959203	0.612667
317	317-5	HMDB0033628	Asitrilobin B	Lipids and lipid-like molecules	Fatty Acyls	Fatty alcohols		C35H64O7	+H	597.473	0.998437	0.639725	0.959203	0.612667
317	317-6	HMDB0034018	Rolliacocin	Lipids and lipid-like molecules	Fatty Acyls	Fatty alcohols		C35H64O7	+H	597.473	0.998437	0.639725	0.959203	0.612667
317	317-7	HMDB0035521	Asitrocinone	Lipids and lipid-like molecules	Fatty Acyls	Fatty alcohols		C35H64O7	+H	597.473	0.998437	0.639725	0.959203	0.612667
317	317-8	HMDB0035994	Squamoxinone C	Lipids and lipid-like molecules	Fatty Acyls	Fatty alcohols		C35H64O7	+H	597.473	0.998437	0.639725	0.959203	0.612667
317	317-9	HMDB0036976	Muricin C	Lipids and lipid-like molecules	Fatty Acyls	Fatty alcohols		C35H64O7	+H	597.473	0.998437	0.639725	0.959203	0.612667
317	317-10	HMDB0036977	Muricin A	Lipids and lipid-like molecules	Fatty Acyls	Fatty alcohols		C35H64O7	+H	597.473	0.998437	0.639725	0.959203	0.612667
317	317-11	HMDB0037771	Howiicin F	Lipids and lipid-like molecules	Fatty Acyls	Fatty alcohols		C35H64O7	+H	597.473	0.998437	0.639725	0.959203	0.612667
317	317-12	HMDB0039604	Isoannoreticuin	Lipids and lipid-like molecules	Fatty Acyls	Fatty alcohols		C35H64O7	+H	597.473	0.998437	0.639725	0.959203	0.612667
317	317-13	HMDB0039605	Annoreticuin	Lipids and lipid-like molecules	Fatty Acyls	Fatty alcohols		C35H64O7	+H	597.473	0.998437	0.639725	0.959203	0.612667
317	317-14	HMDB0040919	Gigantetrocinone	Lipids and lipid-like molecules	Fatty Acyls	Fatty alcohols		C35H64O7	+H	597.473	0.998437	0.639725	0.959203	0.612667
317	317-15	HMDB0041035	Isoannonacin A	Lipids and lipid-like molecules	Fatty Acyls	Fatty alcohols		C35H64O7	+H	597.473	0.998437	0.639725	0.959203	0.612667
317	317-16	HMDB0041523	cis-Goniothalamicin	Lipids and lipid-like molecules	Fatty Acyls	Fatty alcohols		C35H64O7	+H	597.473	0.998437	0.639725	0.959203	0.612667
318	318-1	HMDB0030528	Janthitrem B	Organoheterocyclic compounds	Naphthopyrans			C37H47NO5	+NH4	603.379	0.994294	0.539595	0.932254	0.500169
319	319-1	HMDB0030529	Janthitrem E	Organoheterocyclic compounds	Naphthopyrans			C37H49NO6	+H	604.363	0.995171	0.572996	0.629462	0.358938
320	320-1	HMDB0015006	Benzonatate	Benzenoids	Benzene and substituted derivatives	Benzoic acids and derivatives		C30H53NO11	+H	604.369	0.995978	0.580688	0.851209	0.492299
320	320-2	HMDB0033397	Fumonisin AK1	Organic acids and derivatives	Carboxylic acids and derivatives	Tricarboxylic acids and derivatives		C30H53NO11	+H	604.369	0.995978	0.580688	0.851209	0.492299
321	321-1	HMDB0011497	LysoPE(24:0)	Lipids and lipid-like molecules	Glycerophospholipids	Glycerophosphoethanolamines		C29H60NO7P	+K	604.374	0.995442	0.572513	0.766455	0.436805
322	322-1	HMDB0038713	Erythrinasinate A	Phenylpropanoids and polyketides	Cinnamic acids and derivatives	Hydroxycinnamic acids and derivatives		C38H66O4	+NH4	604.53	0.993488	0.565272	0.913582	0.513059
323	323-1	HMDB0035464	6''-Acetylapiin	Phenylpropanoids and polyketides	Flavonoids	Flavonoid glycosides		C28H30O15	+H	607.166	0.993945	0.541403	0.886899	0.477262
323	323-2	HMDB0041235	6''-O-Acetylvicenin 1	Phenylpropanoids and polyketides	Flavonoids	Flavonoid glycosides		C28H30O15	+H	607.166	0.993945	0.541403	0.886899	0.477262
324	324-1	HMDB0038847	Apigenin 7-[rhamnosyl-(1->2)-galacturonide]	Phenylpropanoids and polyketides	Flavonoids	Flavonoid glycosides		C27H28O15	+NH4	610.177	0.997532	0.594553	0.740632	0.439259
324	324-2	HMDB0041129	6''-O-(3-Hydroxy-3-methylglutaroyl)astragalin	Phenylpropanoids and polyketides	Flavonoids	Flavonoid glycosides		C27H28O15	+NH4	610.177	0.997532	0.594553	0.740632	0.439259
324	324-3	HMDB0041719	Daidzin 4'-O-glucuronide	Phenylpropanoids and polyketides	Stilbenes			C27H28O15	+NH4	610.177	0.997532	0.594553	0.740632	0.439259
325	325-1	HMDB0038090	Peonidin 3-rhamnoside 5-glucoside	Phenylpropanoids and polyketides	Flavonoids	Flavonoid glycosides		C28H33O15	+H	610.189	0.997216	0.589097	0.987274	0.579981
325	325-2	HMDB0041753	Isopeonidin 3-rutinoside	Phenylpropanoids and polyketides	Flavonoids	Flavonoid glycosides		C28H33O15	+H	610.189	0.997216	0.589097	0.987274	0.579981
326	326-1	HMDB0030856	Aurasperone C	Organoheterocyclic compounds	Naphthopyrans	Naphthopyranones		C31H28O12	+NH4	610.192	0.996947	0.533512	0.961997	0.51167
326	326-2	HMDB0040140	8,8'-Methylenebiscatechin	Phenylpropanoids and polyketides	Flavonoids	Flavans		C31H28O12	+NH4	610.192	0.996947	0.533512	0.961997	0.51167
327	327-1	HMDB0037793	(3S,5R,6R,6'S)-6,7-Didehydro-5,6-dihydro-3,5,6'-trihydroxy-13,14,20-trinor-3'-oxo-beta,epsilon-caroten-19',11'-olide 3-acetate	Lipids and lipid-like molecules	Prenol lipids	Terpene lactones		C39H48O7	-H2O+H	611.337	0.993029	0.512424	0.618756	0.314855
328	328-1	HMDB0007020	DG(34:0)	Lipids and lipid-like molecules	Glycerolipids	Diradylglycerols		C37H72O5	+NH4	614.572	0.992786	0.548938	0.924386	0.50377
329	329-1	HMDB0010399	LysoPC(22:1)	Lipids and lipid-like molecules	Glycerophospholipids	Glycerophosphocholines	C04230	C30H60NO7P	+K	616.374	0.994179	0.552543	0.836751	0.45965
330	330-1	HMDB0002204	Astaxanthin	Lipids and lipid-like molecules	Prenol lipids	Tetraterpenoids	C08580	C40H52O4	+Na	619.376	0.992688	0.542588	0.756541	0.407488
330	330-2	HMDB0039091	Capsorubinidione	Lipids and lipid-like molecules	Prenol lipids	Triterpenoids		C40H52O4	+Na	619.376	0.992688	0.542588	0.756541	0.407488
331	331-1	HMDB0029315	Asparagoside B	Lipids and lipid-like molecules	Steroids and steroid derivatives	Steroidal glycosides		C33H56O9	+Na	619.382	0.99264	0.55186	0.771774	0.422776
332	332-1	HMDB0040671	Physapruin B	Organoheterocyclic compounds	Benzopyrans	1-benzopyrans		C34H50O9	+NH4	620.379	0.994804	0.547745	0.647136	0.352624
333	333-1	HMDB0060075	3',5'-Diiodo-L-thyronine 4'-O-sulfate	Organic acids and derivatives	Carboxylic acids and derivatives	Amino acids, peptides, and analogues		C15H13I2NO7S	+NH4	622.884	0.994239	0.546007	0.664339	0.360644
334	334-1	HMDB0029767	Saringosterol 3-glucoside	Lipids and lipid-like molecules	Glycerolipids	Glycosylglycerols		C35H58O7	+K	629.381	0.995641	0.53056	0.604973	0.319575
334	334-2	HMDB0034599	Hebevinoside IX	Lipids and lipid-like molecules	Steroids and steroid derivatives	Steroidal glycosides		C35H58O7	+K	629.381	0.995641	0.53056	0.604973	0.319575
335	335-1	HMDB0036062	Ubiquinone 6	Lipids and lipid-like molecules	Prenol lipids	Quinone and hydroquinone lipids	C17568	C39H58O4	+K	629.397	0.995488	0.565853	0.918653	0.517477
335	335-2	HMDB0041146	Feruloyl-beta-sitosterol	Lipids and lipid-like molecules	Prenol lipids	Triterpenoids		C39H58O4	+K	629.397	0.995488	0.565853	0.918653	0.517477
336	336-1	HMDB0012299	Ubiquinol-6	Lipids and lipid-like molecules	Prenol lipids	Polyprenylphenols		C39H60O4	+K	631.412	0.997292	0.659979	0.97718	0.643172
336	336-2	HMDB0041128	Feruloyldihydro-beta-sitosterol	Lipids and lipid-like molecules	Prenol lipids	Triterpenoids		C39H60O4	+K	631.412	0.997292	0.659979	0.97718	0.643172
337	337-1	HMDB0060192	iso-A2E(11-cis)	Lipids and lipid-like molecules	Prenol lipids	Sesquiterpenoids		C42H58NO	+K	631.415	0.997518	0.762531	0.969756	0.737634
337	337-2	HMDB0060193	iso-A2E(13-cis)	Lipids and lipid-like molecules	Prenol lipids	Sesquiterpenoids		C42H58NO	+K	631.415	0.997518	0.762531	0.969756	0.737634
337	337-3	HMDB0060194	iso-A2E(9-cis)	Lipids and lipid-like molecules	Prenol lipids	Sesquiterpenoids		C42H58NO	+K	631.415	0.997518	0.762531	0.969756	0.737634
337	337-4	HMDB0060195	iso-A2E(9,13-di-cis)	Lipids and lipid-like molecules	Prenol lipids	Sesquiterpenoids		C42H58NO	+K	631.415	0.997518	0.762531	0.969756	0.737634
337	337-5	HMDB0060196	N-Retinylidene-N-retinylethanolamine	Lipids and lipid-like molecules	Prenol lipids	Sesquiterpenoids		C42H58NO	+K	631.415	0.997518	0.762531	0.969756	0.737634
338	338-1	HMDB0036430	Momordicoside K	Lipids and lipid-like molecules	Prenol lipids	Terpene glycosides		C37H60O9	-H2O+H	631.42	0.997355	0.805195	0.970677	0.779517
338	338-2	HMDB0038348	Goyaglycoside a	Lipids and lipid-like molecules	Steroids and steroid derivatives	Steroidal glycosides		C37H60O9	-H2O+H	631.42	0.997355	0.805195	0.970677	0.779517
339	339-1	HMDB0007338	DG(36:8)	Lipids and lipid-like molecules	Fatty Acyls	Lineolic acids and derivatives		C39H60O5	+Na	631.433	0.998512	0.654822	0.922989	0.603494
340	340-1	HMDB0115697	PA(31:2)	Lipids and lipid-like molecules	Glycerophospholipids	Glycerophosphates		C34H63O8P	+H	631.433	0.998507	0.659374	0.911571	0.600169
341	341-1	HMDB0000674	PA(32:0)	Lipids and lipid-like molecules	Glycerophospholipids	Glycerophosphates	C00416	C35H69O8P	-H2O+H	631.47	0.995219	0.662486	0.958136	0.631717
342	342-1	HMDB0007022	DG(34:2)	Lipids and lipid-like molecules	Glycerolipids	Diradylglycerols		C37H68O5	+K	631.47	0.995311	0.637438	0.954839	0.605796
342	342-2	HMDB0032714	cis-Uvariamicin IB	Lipids and lipid-like molecules	Fatty Acyls	Fatty alcohols		C37H68O5	+K	631.47	0.995311	0.637438	0.954839	0.605796
342	342-3	HMDB0034302	Reticulatain 2	Lipids and lipid-like molecules	Fatty Acyls	Fatty alcohols		C37H68O5	+K	631.47	0.995311	0.637438	0.954839	0.605796
342	342-4	HMDB0034560	cis-Uvariamicin IV	Lipids and lipid-like molecules	Fatty Acyls	Fatty alcohols		C37H68O5	+K	631.47	0.995311	0.637438	0.954839	0.605796
342	342-5	HMDB0034924	Neoreticulatacin A	Lipids and lipid-like molecules	Fatty Acyls	Fatty alcohols		C37H68O5	+K	631.47	0.995311	0.637438	0.954839	0.605796
342	342-6	HMDB0055995	DG(33:2)	Lipids and lipid-like molecules	Glycerolipids	Diradylglycerols		C37H68O5	+K	631.47	0.995311	0.637438	0.954839	0.605796
343	343-1	HMDB0008855	PE(28:2)	Lipids and lipid-like molecules	Glycerophospholipids	Glycerophosphoethanolamines		C33H62NO8P	+H	632.429	0.997611	0.594352	0.918432	0.544568
344	344-1	HMDB0116660	PG(24:0)	Lipids and lipid-like molecules	Glycerophospholipids	Glycerophosphoglycerols		C30H59O10P	+Na	633.374	0.99547	0.597946	0.740443	0.440739
345	345-1	HMDB0060057	CE(15:0)	Lipids and lipid-like molecules	Steroids and steroid derivatives	Steroid esters		C42H74O2	+Na	633.558	0.9935	0.556802	0.872586	0.4827
346	346-1	HMDB0007036	DG(38:1)	Lipids and lipid-like molecules	Glycerolipids	Diradylglycerols		C41H78O5	-H2O+H	633.582	0.995519	0.570282	0.93346	0.52995
347	347-1	HMDB0000265	Liothyronine	Organic acids and derivatives	Carboxylic acids and derivatives	Amino acids, peptides, and analogues	C02465	C15H12I3NO4	-H2O+H	633.787	0.995449	0.544805	0.966204	0.523997
347	347-2	HMDB0060074	Reverse-triiodthyronine	Organic acids and derivatives	Carboxylic acids and derivatives	Amino acids, peptides, and analogues		C15H12I3NO4	-H2O+H	633.787	0.995449	0.544805	0.966204	0.523997
348	348-1	HMDB0011764	Cer(d38:0)	Lipids and lipid-like molecules	Sphingolipids	Ceramides		C38H77NO3	+K	634.554	0.99547	0.53669	0.784401	0.419073
349	349-1	HMDB0033335	Antibiotic X 14889C	Lipids and lipid-like molecules	Prenol lipids	Sesterterpenoids		C33H58O10	+Na	637.392	0.992588	0.537517	0.531535	0.283592
350	350-1	HMDB0037904	Madlongiside C	Lipids and lipid-like molecules	Prenol lipids	Triterpenoids		C35H56O10	+H	637.395	0.991582	0.565131	0.58104	0.325599
351	351-1	HMDB0039739	5-Hydroxy-7-methoxy-2-tritriacontyl-4H-1-benzopyran-4-one	Organoheterocyclic compounds	Benzopyrans	1-benzopyrans		C43H74O4	-H2O+H	637.555	0.9944	0.5631	0.739054	0.413831
352	352-1	HMDB0038936	Garcilivin A	Organoheterocyclic compounds	Benzopyrans	1-benzopyrans		C36H28O10	+NH4	638.202	0.995995	0.602143	0.911938	0.546918
352	352-2	HMDB0038937	Garcilivin B	Organoheterocyclic compounds	Benzopyrans	1-benzopyrans		C36H28O10	+NH4	638.202	0.995995	0.602143	0.911938	0.546918
353	353-1	HMDB0029908	Camellianin A	Phenylpropanoids and polyketides	Flavonoids	Flavonoid glycosides		C29H32O15	+NH4	638.208	0.995817	0.568751	0.880272	0.498561
354	354-1	HMDB0030011	(1alpha,3beta,20S,22R,24S,25S)-Pubescenin	Lipids and lipid-like molecules	Prenol lipids	Sesquiterpenoids		C34H52O10	+NH4	638.39	0.995517	0.646002	0.649875	0.417938
354	354-2	HMDB0041049	Physagulin D	Lipids and lipid-like molecules	Steroids and steroid derivatives	Steroid lactones		C34H52O10	+NH4	638.39	0.995517	0.646002	0.649875	0.417938
355	355-1	HMDB0035264	Avenestergenin A1	Lipids and lipid-like molecules	Prenol lipids	Triterpenoids		C38H55NO7	+H	638.405	0.995594	0.561468	0.886646	0.49563
356	356-1	HMDB0003020	Neoxanthin	Lipids and lipid-like molecules	Prenol lipids	Tetraterpenoids	C08606	C40H56O4	+K	639.381	0.994045	0.526592	0.505831	0.26478
356	356-2	HMDB0003101	Violaxanthin	Lipids and lipid-like molecules	Prenol lipids	Tetraterpenoids	C08614	C40H56O4	+K	639.381	0.994045	0.526592	0.505831	0.26478
356	356-3	HMDB0033260	Capsanthin 3,6-epoxide	Lipids and lipid-like molecules	Prenol lipids	Tetraterpenoids		C40H56O4	+K	639.381	0.994045	0.526592	0.505831	0.26478
356	356-4	HMDB0035320	Cucurbitaxanthin B	Lipids and lipid-like molecules	Prenol lipids	Tetraterpenoids		C40H56O4	+K	639.381	0.994045	0.526592	0.505831	0.26478
356	356-5	HMDB0036588	Capsanthin 5,6-epoxide	Lipids and lipid-like molecules	Prenol lipids	Tetraterpenoids		C40H56O4	+K	639.381	0.994045	0.526592	0.505831	0.26478
356	356-6	HMDB0036873	Heteroxanthin	Lipids and lipid-like molecules	Prenol lipids	Triterpenoids		C40H56O4	+K	639.381	0.994045	0.526592	0.505831	0.26478
356	356-7	HMDB0036876	Auroxanthin	Lipids and lipid-like molecules	Prenol lipids	Tetraterpenoids		C40H56O4	+K	639.381	0.994045	0.526592	0.505831	0.26478
356	356-8	HMDB0036912	Salmoxanthin	Lipids and lipid-like molecules	Prenol lipids	Tetraterpenoids		C40H56O4	+K	639.381	0.994045	0.526592	0.505831	0.26478
356	356-9	HMDB0036913	Capsochrome	Lipids and lipid-like molecules	Prenol lipids	Triterpenoids		C40H56O4	+K	639.381	0.994045	0.526592	0.505831	0.26478
356	356-10	HMDB0036924	Capsorubin	Lipids and lipid-like molecules	Prenol lipids	Triterpenoids	C08585	C40H56O4	+K	639.381	0.994045	0.526592	0.505831	0.26478
356	356-11	HMDB0038106	Cycloviolaxanthin	Lipids and lipid-like molecules	Prenol lipids	Tetraterpenoids		C40H56O4	+K	639.381	0.994045	0.526592	0.505831	0.26478
356	356-12	HMDB0039023	beta-Carotenone	Lipids and lipid-like molecules	Prenol lipids	Triterpenoids		C40H56O4	+K	639.381	0.994045	0.526592	0.505831	0.26478
356	356-13	HMDB0041581	Cucurbitachrome 1	Lipids and lipid-like molecules	Prenol lipids	Tetraterpenoids		C40H56O4	+K	639.381	0.994045	0.526592	0.505831	0.26478
357	357-1	HMDB0030806	Petunin	Phenylpropanoids and polyketides	Flavonoids	Flavonoid glycosides		C28H33O17	+H	642.179	0.995723	0.560692	0.761748	0.425279
357	357-2	HMDB0038096	Petunidin 3-gentiobioside	Phenylpropanoids and polyketides	Flavonoids	Flavonoid glycosides		C28H33O17	+H	642.179	0.995723	0.560692	0.761748	0.425279
358	358-1	HMDB0060586	N-Trifluoroacetyladriamycinol	Phenylpropanoids and polyketides	Anthracyclines			C29H30F3NO12	+H	642.179	0.994662	0.540989	0.81004	0.435883
359	359-1	HMDB0033005	4''-Methyl-6''-(3,4-dihydroxy-E-cinnamoyl)isoorientin	Phenylpropanoids and polyketides	Flavonoids	Flavonoid glycosides		C31H28O14	+NH4	642.182	0.994822	0.548749	0.871087	0.475534
360	360-1	HMDB0011775	Cer(d40:2)	Lipids and lipid-like molecules	Sphingolipids	Ceramides		C40H77NO3	+Na	642.58	0.995462	0.5826	0.750104	0.435027
361	361-1	HMDB0034840	Faradiol laurate	Lipids and lipid-like molecules	Prenol lipids	Triterpenoids		C42H72O3	+NH4	642.582	0.995176	0.609499	0.872488	0.529215
362	362-1	HMDB0114813	PA(29:1)	Lipids and lipid-like molecules	Glycerophospholipids	Glycerophosphates		C32H61O8P	+K	643.374	0.995744	0.585266	0.751703	0.438074
363	363-1	HMDB0002579	Glycochenodeoxycholic acid 3-glucuronide	Lipids and lipid-like molecules	Steroids and steroid derivatives	Steroidal glycosides	C03033	C32H51NO11	+NH4	643.38	0.995897	0.55078	0.950625	0.521437
364	364-1	HMDB0034843	Acteoside	Phenylpropanoids and polyketides	Cinnamic acids and derivatives	Hydroxycinnamic acids and derivatives	C10501	C29H36O15	+Na	647.195	0.994319	0.569641	0.617685	0.34986
364	364-2	HMDB0041025	Isoacteoside	Phenylpropanoids and polyketides	Cinnamic acids and derivatives	Hydroxycinnamic acids and derivatives		C29H36O15	+Na	647.195	0.994319	0.569641	0.617685	0.34986
365	365-1	HMDB0038585	Somniferine	Alkaloids and derivatives	Morphinans			C36H36N2O7	+K	647.216	0.994934	0.533318	0.876596	0.465136
366	366-1	HMDB0030531	Janthitrem G	Organic acids and derivatives	Peptidomimetics	Depsipeptides		C39H51NO6	+NH4	647.405	0.996329	0.528982	0.921037	0.485424
367	367-1	HMDB0114803	PA(34:6)	Lipids and lipid-like molecules	Glycerophospholipids	Glycerophosphates		C37H61O8P	-H2O+H	647.407	0.995249	0.521844	0.954589	0.49578
368	368-1	HMDB0007028	DG(36:0)	Lipids and lipid-like molecules	Glycerolipids	Diradylglycerols		C39H76O5	+Na	647.559	0.993868	0.541052	0.834158	0.448556
368	368-2	HMDB0031012	Glycerol 1,2-dioctadecanoate	Lipids and lipid-like molecules	Glycerolipids	Diradylglycerols		C39H76O5	+Na	647.559	0.993868	0.541052	0.834158	0.448556
369	369-1	HMDB0007146	DG(38:3)	Lipids and lipid-like molecules	Glycerolipids	Diradylglycerols		C41H74O5	+H	647.561	0.994172	0.529023	0.90888	0.478016
370	370-1	HMDB0031148	Protochlorophyllide	Organoheterocyclic compounds	Tetrapyrroles and derivatives	Metallotetrapyrroles	C02880	C35H32MgN4O5	+K	651.186	0.996425	0.54817	0.791847	0.432515
371	371-1	HMDB0015185	Novobiocin	Phenylpropanoids and polyketides	Coumarins and derivatives	Coumarin glycosides	C05080	C31H36N2O11	+K	651.195	0.995859	0.552586	0.917117	0.504687
372	372-1	HMDB0040650	3-trans-Caffeoyltormentic acid	Lipids and lipid-like molecules	Prenol lipids	Triterpenoids		C39H54O8	+H	651.389	0.995607	0.636724	0.943115	0.597866
372	372-2	HMDB0040682	23-trans-p-Coumaroyloxytormentic acid	Lipids and lipid-like molecules	Prenol lipids	Triterpenoids		C39H54O8	+H	651.389	0.995607	0.636724	0.943115	0.597866
373	373-1	HMDB0114853	PA(30:2)	Lipids and lipid-like molecules	Glycerophospholipids	Glycerophosphates		C33H61O8P	+K	655.374	0.99602	0.529969	0.907714	0.479146
374	374-1	HMDB0002741	Fucoxanthin	Lipids and lipid-like molecules	Prenol lipids	Tetraterpenoids	C08596	C42H58O6	+H	659.431	0.997782	0.564095	0.939851	0.528989
375	375-1	HMDB0032949	9-Oxoasimicinone	Lipids and lipid-like molecules	Fatty Acyls	Fatty alcohols		C37H64O8	+Na	659.449	0.997485	0.771048	0.967769	0.74432
376	376-1	HMDB0007288	DG(38:8)	Lipids and lipid-like molecules	Glycerolipids	Diradylglycerols		C41H64O5	+Na	659.465	0.997861	0.525284	0.91569	0.479969
377	377-1	HMDB0114815	PA(33:2)	Lipids and lipid-like molecules	Glycerophospholipids	Glycerophosphates		C36H67O8P	+H	659.465	0.997861	0.535474	0.933397	0.49874
378	378-1	HMDB0011671	ADP-ribose 1"-2" cyclic phosphate	Lipids and lipid-like molecules	Glycerophospholipids	Glycerophosphocholines		C15H22N5O16P3	+K	659.991	0.99432	0.548835	0.803162	0.438299
379	379-1	HMDB0034520	Gypsogenin 3-O-b-D-glucuronide	Lipids and lipid-like molecules	Prenol lipids	Terpene glycosides		C36H54O10	+NH4	664.406	0.995345	0.547689	0.710942	0.387563
379	379-2	HMDB0037827	Monoglucuronylglycyrrhetinic acid	Lipids and lipid-like molecules	Prenol lipids	Terpene glycosides		C36H54O10	+NH4	664.406	0.995345	0.547689	0.710942	0.387563
380	380-1	HMDB0010369	CE(18:3)	Lipids and lipid-like molecules	Steroids and steroid derivatives	Steroid esters		C45H74O2	+NH4	664.603	0.995648	0.57032	0.714467	0.405702
381	381-1	HMDB0030530	Janthitrem F	Organoheterocyclic compounds	Naphthopyrans			C39H51NO7	+Na	668.356	0.991502	0.521657	0.639398	0.330712
382	382-1	HMDB0114809	PA(36:7)	Lipids and lipid-like molecules	Glycerophospholipids	Glycerophosphates		C39H63O8P	-H2O+H	673.423	0.994498	0.516154	0.95775	0.491626
383	383-1	HMDB0037129	Sanchinoside B1	Lipids and lipid-like molecules	Prenol lipids	Triterpenoids		C36H62O9	+K	677.403	0.994932	0.54436	0.968132	0.524341
383	383-2	HMDB0039554	Ginsenoside Rh1	Lipids and lipid-like molecules	Prenol lipids	Triterpenoids		C36H62O9	+K	677.403	0.994932	0.54436	0.968132	0.524341
383	383-3	HMDB0039555	Ginsenoside F1	Lipids and lipid-like molecules	Prenol lipids	Triterpenoids		C36H62O9	+K	677.403	0.994932	0.54436	0.968132	0.524341
384	384-1	HMDB0007152	DG(40:2)	Lipids and lipid-like molecules	Glycerolipids	Diradylglycerols		C43H80O5	+H	677.608	0.995614	0.542027	0.920205	0.496588
385	385-1	HMDB0001902	Pteroyltriglutamic acid	Organic acids and derivatives	Carboxylic acids and derivatives	Amino acids, peptides, and analogues		C29H33N9O12	-H2O+H	682.222	0.994273	0.570992	0.867277	0.492372
386	386-1	HMDB0034552	Medicagenic acid 3-O-beta-D-glucoside	Lipids and lipid-like molecules	Prenol lipids	Terpene glycosides		C36H56O11	+NH4	682.416	0.993878	0.633042	0.673878	0.423981
386	386-2	HMDB0034636	Phytolaccasaponin G	Lipids and lipid-like molecules	Prenol lipids	Triterpenoids		C36H56O11	+NH4	682.416	0.993878	0.633042	0.673878	0.423981
386	386-3	HMDB0041347	Elatoside G	Organoheterocyclic compounds	Pyridines and derivatives			C36H56O11	+NH4	682.416	0.993878	0.633042	0.673878	0.423981
387	387-1	HMDB0035101	Lansioside A	Lipids and lipid-like molecules	Prenol lipids	Terpene glycosides		C38H61NO8	+Na	682.429	0.993687	0.596753	0.953161	0.565211
388	388-1	HMDB0031837	3-O-trans-Feruloyleuscaphic acid	Lipids and lipid-like molecules	Prenol lipids	Triterpenoids		C40H56O8	+NH4	682.431	0.993584	0.567435	0.902446	0.508794
389	389-1	HMDB0116369	DG(11D14D14)	Lipids and lipid-like molecules	Fatty Acyls	Fatty acids and conjugates		C43H72O7	-H2O+H	683.525	0.997428	0.557021	0.959977	0.533353
389	389-2	HMDB0116376	DG(11D12D12)	Lipids and lipid-like molecules	Fatty Acyls	Fatty acids and conjugates		C43H72O7	-H2O+H	683.525	0.997428	0.557021	0.959977	0.533353
389	389-3	HMDB0116390	DG(11M14M14)	Lipids and lipid-like molecules	Fatty Acyls	Fatty acids and conjugates		C43H72O7	-H2O+H	683.525	0.997428	0.557021	0.959977	0.533353
389	389-4	HMDB0116423	DG(9D14D14)	Lipids and lipid-like molecules	Fatty Acyls	Fatty acids and conjugates		C43H72O7	-H2O+H	683.525	0.997428	0.557021	0.959977	0.533353
389	389-5	HMDB0116443	DG(9M16M16)	Lipids and lipid-like molecules	Fatty Acyls	Fatty acids and conjugates		C43H72O7	-H2O+H	683.525	0.997428	0.557021	0.959977	0.533353
390	390-1	HMDB0240613	SM(d34:2)	Lipids and lipid-like molecules	Sphingolipids	Phosphosphingolipids		C39H77N2O6P	-H2O+H	683.549	0.997135	0.867167	0.971226	0.839801
391	391-1	HMDB0041373	Ustiloxin B	Lipids and lipid-like molecules	Fatty Acyls	Fatty alcohols		C26H39N5O12S	+K	684.195	0.997698	0.628179	0.803848	0.503798
392	392-1	HMDB0007208	DG(40:7)	Lipids and lipid-like molecules	Glycerolipids	Diradylglycerols		C43H70O5	+NH4	684.556	0.997515	0.692166	0.914598	0.631481
393	393-1	HMDB0008856	PE(29:1)	Lipids and lipid-like molecules	Glycerophospholipids	Glycerophosphoethanolamines		C34H66NO8P	+K	686.416	0.995191	0.593283	0.938234	0.553962
394	394-1	HMDB0034610	Zucchini factor B	Lipids and lipid-like molecules	Prenol lipids	Triterpenoids		C44H57NO4	+Na	686.418	0.995232	0.535606	0.871705	0.464664
395	395-1	HMDB0114785	PA(34:4)	Lipids and lipid-like molecules	Glycerophospholipids	Glycerophosphates		C37H65O8P	+Na	691.431	0.992332	0.5138	0.880479	0.448922
396	396-1	HMDB0114819	PA(35:0)	Lipids and lipid-like molecules	Glycerophospholipids	Glycerophosphates		C38H75O8P	+H	691.527	0.996953	0.6601	0.949724	0.625003
397	397-1	HMDB0007179	DG(40:6)	Lipids and lipid-like molecules	Glycerolipids	Diradylglycerols		C43H72O5	+Na	691.527	0.996959	0.653651	0.930625	0.606454
398	398-1	HMDB0064779	TG(37:0)	Lipids and lipid-like molecules	Glycerolipids	Triradylcglycerols		C40H76O6	+K	691.527	0.996966	0.63052	0.930811	0.585114
399	399-1	HMDB0007469	DG(42:9)	Lipids and lipid-like molecules	Glycerolipids	Diradylglycerols		C45H70O5	+H	691.53	0.997166	0.645379	0.908084	0.584397
400	400-1	HMDB0008852	PE(14:0/P-18:1)	Lipids and lipid-like molecules	Glycerophospholipids	Glycerophosphoethanolamines		C37H72NO7P	+NH4	691.538	0.997392	0.631805	0.877916	0.553225
400	400-2	HMDB0008884	PE(14:1/P-18:0)	Lipids and lipid-like molecules	Glycerophospholipids	Glycerophosphoethanolamines		C37H72NO7P	+NH4	691.538	0.997392	0.631805	0.877916	0.553225
400	400-3	HMDB0008982	PE(16:1/P-16:0)	Lipids and lipid-like molecules	Glycerophospholipids	Glycerophosphoethanolamines		C37H72NO7P	+NH4	691.538	0.997392	0.631805	0.877916	0.553225
400	400-4	HMDB0011339	PE(P-16:0/16:1)	Lipids and lipid-like molecules	Glycerophospholipids	Glycerophosphoethanolamines		C37H72NO7P	+NH4	691.538	0.997392	0.631805	0.877916	0.553225
400	400-5	HMDB0011369	PE(P-18:0/14:1)	Lipids and lipid-like molecules	Glycerophospholipids	Glycerophosphoethanolamines		C37H72NO7P	+NH4	691.538	0.997392	0.631805	0.877916	0.553225
400	400-6	HMDB0011401	PE(P-18:1/14:0)	Lipids and lipid-like molecules	Glycerophospholipids	Glycerophosphoethanolamines		C37H72NO7P	+NH4	691.538	0.997392	0.631805	0.877916	0.553225
401	401-1	HMDB0034841	Faradiol myristate	Lipids and lipid-like molecules	Prenol lipids	Triterpenoids		C44H76O3	+K	691.543	0.997335	0.528498	0.806838	0.425276
402	402-1	HMDB0036978	Sucrose 1',4'-(4,4'-dihydroxy-3,3'-dimethoxy-b-truxinate)	Phenylpropanoids and polyketides	Stilbenes	Stilbene glycosides		C32H38O17	+H	695.218	0.994549	0.568141	0.973247	0.549927
402	402-2	HMDB0041210	Sesaminol glucosyl-(1->2)-glucoside	Lignans, neolignans and related compounds	Lignan glycosides			C32H38O17	+H	695.218	0.994549	0.568141	0.973247	0.549927
403	403-1	HMDB0114816	PA(33:3)	Lipids and lipid-like molecules	Glycerophospholipids	Glycerophosphates		C36H65O8P	+K	695.405	0.995342	0.571635	0.659805	0.375411
404	404-1	HMDB0036405	7-Epizucchini factor A	Benzenoids	Benzene and substituted derivatives	Benzoic acids and derivatives		C44H59NO5	+Na	704.429	0.992927	0.545809	0.902459	0.489086
405	405-1	HMDB0061667	CE(DiMe(11,3))	Lipids and lipid-like molecules	Steroids and steroid derivatives	Steroid esters		C47H78O3	+NH4	708.629	0.995973	0.538119	0.724612	0.388357
405	405-2	HMDB0061671	CE(DiMe(9,5))	Lipids and lipid-like molecules	Steroids and steroid derivatives	Steroid esters		C47H78O3	+NH4	708.629	0.995973	0.538119	0.724612	0.388357
405	405-3	HMDB0112220	CE(7D7)	Lipids and lipid-like molecules	Steroids and steroid derivatives	Steroid esters		C47H78O3	+NH4	708.629	0.995973	0.538119	0.724612	0.388357
405	405-4	HMDB0112234	CE(9M6)	Lipids and lipid-like molecules	Steroids and steroid derivatives	Steroid esters		C47H78O3	+NH4	708.629	0.995973	0.538119	0.724612	0.388357
406	406-1	HMDB0116392	DG(11M16M16)	Lipids and lipid-like molecules	Fatty Acyls	Fatty acids and conjugates		C45H76O7	-H2O+H	711.556	0.996693	0.583159	0.93573	0.543875
406	406-2	HMDB0116411	DG(13D14D14)	Lipids and lipid-like molecules	Fatty Acyls	Fatty acids and conjugates		C45H76O7	-H2O+H	711.556	0.996693	0.583159	0.93573	0.543875
406	406-3	HMDB0116416	DG(13M16M16)	Lipids and lipid-like molecules	Fatty Acyls	Fatty acids and conjugates		C45H76O7	-H2O+H	711.556	0.996693	0.583159	0.93573	0.543875
406	406-4	HMDB0116421	DG(13M14M14)	Lipids and lipid-like molecules	Fatty Acyls	Fatty acids and conjugates		C45H76O7	-H2O+H	711.556	0.996693	0.583159	0.93573	0.543875
406	406-5	HMDB0116426	DG(9D16D16)	Lipids and lipid-like molecules	Fatty Acyls	Fatty acids and conjugates		C45H76O7	-H2O+H	711.556	0.996693	0.583159	0.93573	0.543875
406	406-6	HMDB0116445	DG(9M18M18)	Lipids and lipid-like molecules	Fatty Acyls	Fatty acids and conjugates		C45H76O7	-H2O+H	711.556	0.996693	0.583159	0.93573	0.543875
407	407-1	HMDB0112197	CE(11:1D3)	Lipids and lipid-like molecules	Steroids and steroid derivatives	Steroid esters		C47H76O3	+Na	711.569	0.997337	0.862187	0.986422	0.848215
407	407-2	HMDB0112200	CE(11D3:1)	Lipids and lipid-like molecules	Steroids and steroid derivatives	Steroid esters		C47H76O3	+Na	711.569	0.997337	0.862187	0.986422	0.848215
408	408-1	HMDB0001060	Ubiquinol 8	Lipids and lipid-like molecules	Prenol lipids	Quinone and hydroquinone lipids		C49H76O4	-H2O+H	711.571	0.996988	0.901775	0.973273	0.875029
409	409-1	HMDB0012100	SM(d36:2)	Lipids and lipid-like molecules	Sphingolipids	Phosphosphingolipids	C00550	C41H81N2O6P	-H2O+H	711.58	0.997355	0.827029	0.976166	0.805182
409	409-2	HMDB0240631	SM(d18:2(4E,14Z)18:2)	Lipids and lipid-like molecules	Sphingolipids	Phosphosphingolipids		C41H81N2O6P	-H2O+H	711.58	0.997355	0.827029	0.976166	0.805182
410	410-1	HMDB0056253	DG(40:3)	Lipids and lipid-like molecules	Glycerolipids	Diradylglycerols		C44H80O5	+Na	711.59	0.997335	0.564276	0.961882	0.541321
410	410-2	HMDB0116449	DG(41:3)	Lipids and lipid-like molecules	Glycerolipids	Diradylglycerols		C44H80O5	+Na	711.59	0.997335	0.564276	0.961882	0.541321
411	411-1	HMDB0007963	PC(15:0/P-18:1)	Lipids and lipid-like molecules	Glycerophospholipids	Glycerophosphocholines		C41H80NO7P	-H2O+H	712.564	0.997501	0.549639	0.947319	0.519382
411	411-2	HMDB0009017	PE(18:0/P-18:1)	Lipids and lipid-like molecules	Glycerophospholipids	Glycerophosphoethanolamines		C41H80NO7P	-H2O+H	712.564	0.997501	0.549639	0.947319	0.519382
411	411-3	HMDB0009049	PE(18:1/P-18:0)	Lipids and lipid-like molecules	Glycerophospholipids	Glycerophosphoethanolamines		C41H80NO7P	-H2O+H	712.564	0.997501	0.549639	0.947319	0.519382
411	411-4	HMDB0009279	PE(20:1/P-16:0)	Lipids and lipid-like molecules	Glycerophospholipids	Glycerophosphoethanolamines		C41H80NO7P	-H2O+H	712.564	0.997501	0.549639	0.947319	0.519382
411	411-5	HMDB0011271	PC(P-18:1/15:0)	Lipids and lipid-like molecules	Glycerophospholipids	Glycerophosphocholines		C41H80NO7P	-H2O+H	712.564	0.997501	0.549639	0.947319	0.519382
411	411-6	HMDB0011348	PE(P-16:0/20:1)	Lipids and lipid-like molecules	Glycerophospholipids	Glycerophosphoethanolamines		C41H80NO7P	-H2O+H	712.564	0.997501	0.549639	0.947319	0.519382
411	411-7	HMDB0011406	PE(P-18:1/18:0)	Lipids and lipid-like molecules	Glycerophospholipids	Glycerophosphoethanolamines		C41H80NO7P	-H2O+H	712.564	0.997501	0.549639	0.947319	0.519382
412	412-1	HMDB0114791	PA(36:5)	Lipids and lipid-like molecules	Glycerophospholipids	Glycerophosphates		C39H67O8P	+Na	717.447	0.991795	0.540486	0.9487	0.508552
413	413-1	HMDB0114990	PA(38:8)	Lipids and lipid-like molecules	Glycerophospholipids	Glycerophosphates		C41H65O8P	+H	717.449	0.991653	0.516041	0.904486	0.462856
414	414-1	HMDB0007382	DG(42:6)	Lipids and lipid-like molecules	Glycerolipids	Diradylglycerols		C45H76O5	+Na	719.559	0.997352	0.573356	0.950582	0.543578
415	415-1	HMDB0114824	PA(37:0)	Lipids and lipid-like molecules	Glycerophospholipids	Glycerophosphates		C40H79O8P	+H	719.559	0.997361	0.576749	0.968664	0.557202
416	416-1	HMDB0031110	Glycerol tritridecanoate	Lipids and lipid-like molecules	Glycerolipids	Triradylcglycerols		C42H80O6	+K	719.559	0.997372	0.551248	0.953873	0.524439
416	416-2	HMDB0064731	TG(39:0)	Lipids and lipid-like molecules	Glycerolipids	Triradylcglycerols		C42H80O6	+K	719.559	0.997372	0.551248	0.953873	0.524439
417	417-1	HMDB0007699	DG(44:9)	Lipids and lipid-like molecules	Glycerolipids	Diradylglycerols		C47H74O5	+H	719.561	0.997247	0.540895	0.952254	0.513651
418	418-1	HMDB0114821	PA(35:4)	Lipids and lipid-like molecules	Glycerophospholipids	Glycerophosphates		C38H67O8P	+K	721.421	0.993693	0.522304	0.793866	0.412024
419	419-1	HMDB0041549	Hovenidulcioside B2	Lipids and lipid-like molecules	Prenol lipids	Terpene glycosides		C38H60O12	+NH4	726.442	0.993221	0.567352	0.649343	0.365908
420	420-1	HMDB0008829	PE(32:2)	Lipids and lipid-like molecules	Glycerophospholipids	Glycerophosphoethanolamines		C37H70NO8P	+K	726.447	0.992654	0.577905	0.754082	0.432586
421	421-1	HMDB0114826	PA(37:2)	Lipids and lipid-like molecules	Glycerophospholipids	Glycerophosphates		C40H75O8P	+NH4	732.554	0.996822	0.690879	0.794738	0.547323
422	422-1	HMDB0007730	DG(44:11)	Lipids and lipid-like molecules	Glycerolipids	Diradylglycerols		C47H70O5	+NH4	732.556	0.996732	0.687024	0.717002	0.490987
423	423-1	HMDB0008835	PE(34:2)	Lipids and lipid-like molecules	Glycerophospholipids	Glycerophosphoethanolamines		C39H74NO8P	+NH4	733.549	0.995103	0.616703	0.952452	0.584503
424	424-1	HMDB0036967	3-Hexadecanoyloleanolic acid	Lipids and lipid-like molecules	Prenol lipids	Triterpenoids		C46H78O4	+K	733.553	0.99389	0.625816	0.881224	0.548114
425	425-1	HMDB0114825	PA(37:1)	Lipids and lipid-like molecules	Glycerophospholipids	Glycerophosphates		C40H77O8P	+NH4	734.569	0.997227	0.584254	0.958944	0.558713
426	426-1	HMDB0007701	DG(44:10)	Lipids and lipid-like molecules	Glycerolipids	Diradylglycerols		C47H72O5	+NH4	734.572	0.997158	0.556782	0.93545	0.519361
427	427-1	HMDB0047885	TG(42:3)	Lipids and lipid-like molecules	Glycerolipids	Triradylcglycerols		C45H80O6	+Na	739.585	0.997652	0.706738	0.939254	0.662248
428	428-1	HMDB0116373	DG(11D16D16)	Lipids and lipid-like molecules	Fatty Acyls	Fatty acids and conjugates		C47H80O7	-H2O+H	739.587	0.997479	0.724269	0.945005	0.682712
428	428-2	HMDB0116401	DG(11M18M18)	Lipids and lipid-like molecules	Fatty Acyls	Fatty acids and conjugates		C47H80O7	-H2O+H	739.587	0.997479	0.724269	0.945005	0.682712
428	428-3	HMDB0116405	DG(13D16D16)	Lipids and lipid-like molecules	Fatty Acyls	Fatty acids and conjugates		C47H80O7	-H2O+H	739.587	0.997479	0.724269	0.945005	0.682712
428	428-4	HMDB0116435	DG(9D18D18)	Lipids and lipid-like molecules	Fatty Acyls	Fatty acids and conjugates		C47H80O7	-H2O+H	739.587	0.997479	0.724269	0.945005	0.682712
429	429-1	HMDB0112198	CE(11:1D5)	Lipids and lipid-like molecules	Steroids and steroid derivatives	Steroid esters		C49H80O3	+Na	739.6	0.997374	0.779032	0.960158	0.74603
429	429-2	HMDB0112202	CE(11D5:1)	Lipids and lipid-like molecules	Steroids and steroid derivatives	Steroid esters		C49H80O3	+Na	739.6	0.997374	0.779032	0.960158	0.74603
430	430-1	HMDB0240610	SM(d38:2)	Lipids and lipid-like molecules	Sphingolipids	Phosphosphingolipids		C43H85N2O6P	-H2O+H	739.611	0.997813	0.767009	0.983894	0.753005
431	431-1	HMDB0056268	DG(42:3)	Lipids and lipid-like molecules	Glycerolipids	Diradylglycerols		C46H84O5	+Na	739.621	0.998381	0.609392	0.973649	0.592373
432	432-1	HMDB0009248	PE(20:0/P-18:1)	Lipids and lipid-like molecules	Glycerophospholipids	Glycerophosphoethanolamines		C43H84NO7P	-H2O+H	740.595	0.997547	0.57242	0.898319	0.512954
432	432-2	HMDB0009280	PE(20:1/P-18:0)	Lipids and lipid-like molecules	Glycerophospholipids	Glycerophosphoethanolamines		C43H84NO7P	-H2O+H	740.595	0.997547	0.57242	0.898319	0.512954
432	432-3	HMDB0009543	PE(22:1/P-16:0)	Lipids and lipid-like molecules	Glycerophospholipids	Glycerophosphoethanolamines		C43H84NO7P	-H2O+H	740.595	0.997547	0.57242	0.898319	0.512954
432	432-4	HMDB0011356	PE(P-16:0/22:1)	Lipids and lipid-like molecules	Glycerophospholipids	Glycerophosphoethanolamines		C43H84NO7P	-H2O+H	740.595	0.997547	0.57242	0.898319	0.512954
432	432-5	HMDB0011381	PE(P-18:0/20:1)	Lipids and lipid-like molecules	Glycerophospholipids	Glycerophosphoethanolamines		C43H84NO7P	-H2O+H	740.595	0.997547	0.57242	0.898319	0.512954
432	432-6	HMDB0011413	PE(P-18:1/20:0)	Lipids and lipid-like molecules	Glycerophospholipids	Glycerophosphoethanolamines		C43H84NO7P	-H2O+H	740.595	0.997547	0.57242	0.898319	0.512954
433	433-1	HMDB0007643	DG(44:7)	Lipids and lipid-like molecules	Glycerolipids	Diradylglycerols		C47H78O5	+NH4	740.619	0.997875	0.552923	0.886418	0.489079
434	434-1	HMDB0007897	PC(14:0/P-18:1)	Lipids and lipid-like molecules	Glycerophospholipids	Glycerophosphocholines	C00157	C40H78NO7P	+K	754.515	0.995424	0.588387	0.915871	0.53642
434	434-2	HMDB0007929	PC(14:1/P-18:0)	Lipids and lipid-like molecules	Glycerophospholipids	Glycerophosphocholines		C40H78NO7P	+K	754.515	0.995424	0.588387	0.915871	0.53642
434	434-3	HMDB0008027	PC(16:1/P-16:0)	Lipids and lipid-like molecules	Glycerophospholipids	Glycerophosphocholines		C40H78NO7P	+K	754.515	0.995424	0.588387	0.915871	0.53642
434	434-4	HMDB0011207	PC(P-16:0/16:1)	Lipids and lipid-like molecules	Glycerophospholipids	Glycerophosphocholines		C40H78NO7P	+K	754.515	0.995424	0.588387	0.915871	0.53642
434	434-5	HMDB0011237	PC(P-18:0/14:1)	Lipids and lipid-like molecules	Glycerophospholipids	Glycerophosphocholines		C40H78NO7P	+K	754.515	0.995424	0.588387	0.915871	0.53642
434	434-6	HMDB0011269	PC(P-18:1/14:0)	Lipids and lipid-like molecules	Glycerophospholipids	Glycerophosphocholines		C40H78NO7P	+K	754.515	0.995424	0.588387	0.915871	0.53642
434	434-7	HMDB0013411	PC(O-16:1/16:1)	Lipids and lipid-like molecules	Glycerophospholipids	Glycerophosphocholines		C40H78NO7P	+K	754.515	0.995424	0.588387	0.915871	0.53642
435	435-1	HMDB0032843	AS 1-5	Lipids and lipid-like molecules	Sphingolipids	Glycosphingolipids		C40H77NO9	+K	754.523	0.995827	0.65625	0.941487	0.615273
436	436-1	HMDB0007883	PC(34:4)	Lipids and lipid-like molecules	Glycerophospholipids	Glycerophosphocholines		C42H76NO8P	+H	754.538	0.994787	0.760474	0.715353	0.541172
436	436-2	HMDB0008910	PE(37:4)	Lipids and lipid-like molecules	Glycerophospholipids	Glycerophosphoethanolamines		C42H76NO8P	+H	754.538	0.994787	0.760474	0.715353	0.541172
437	437-1	HMDB0029216	SM C16:1	Organic nitrogen compounds	Organonitrogen compounds	Quaternary ammonium salts		C40H80N2O6P	+K	754.539	0.995206	0.758569	0.77686	0.586477
438	438-1	HMDB0008845	PE(36:5)	Lipids and lipid-like molecules	Glycerophospholipids	Glycerophosphoethanolamines	C00350	C41H72NO8P	+NH4	755.533	0.99283	0.685134	0.858828	0.584194
438	438-2	HMDB0113030	PE-NMe(35:5)	Lipids and lipid-like molecules	Glycerophospholipids	Glycerophosphoethanolamines		C41H72NO8P	+NH4	755.533	0.99283	0.685134	0.858828	0.584194
438	438-3	HMDB0113889	PE-NMe2(34:5)	Lipids and lipid-like molecules	Glycerophospholipids	Glycerophosphoethanolamines		C41H72NO8P	+NH4	755.533	0.99283	0.685134	0.858828	0.584194
439	439-1	HMDB0040991	Ternatin	Organic acids and derivatives	Carboxylic acids and derivatives	Amino acids, peptides, and analogues	C16302	C37H67N7O8	+NH4	755.539	0.992802	0.725119	0.731222	0.526406
440	440-1	HMDB0240609	SM(d35:1)	Lipids and lipid-like molecules	Sphingolipids	Phosphosphingolipids		C40H81N2O6P	+K	755.546	0.993962	0.754885	0.637341	0.478214
441	441-1	HMDB0114914	PA(40:3)	Lipids and lipid-like molecules	Glycerophospholipids	Glycerophosphates		C43H79O8P	+H	755.559	0.995918	0.539432	0.546981	0.293854
442	442-1	HMDB0007881	PC(34:3)	Lipids and lipid-like molecules	Glycerophospholipids	Glycerophosphocholines		C42H78NO8P	+H	756.554	0.99594	0.733863	0.854433	0.624491
442	442-2	HMDB0113011	PE-NMe(36:3)	Lipids and lipid-like molecules	Glycerophospholipids	Glycerophosphoethanolamines		C42H78NO8P	+H	756.554	0.99594	0.733863	0.854433	0.624491
442	442-3	HMDB0113926	PE-NMe2(35:3)	Lipids and lipid-like molecules	Glycerophospholipids	Glycerophosphoethanolamines		C42H78NO8P	+H	756.554	0.99594	0.733863	0.854433	0.624491
443	443-1	HMDB0007943	PC(33:4)	Lipids and lipid-like molecules	Glycerophospholipids	Glycerophosphocholines		C41H74NO8P	+NH4	757.549	0.993616	0.577143	0.956706	0.548632
444	444-1	HMDB0112283	PS(33:1)	Lipids and lipid-like molecules	Glycerophospholipids	Glycerophosphoserines		C39H74NO10P	+Na	770.494	0.996781	0.732354	0.979713	0.715187
445	445-1	HMDB0112331	PS(35:4)	Lipids and lipid-like molecules	Glycerophospholipids	Glycerophosphoserines		C41H72NO10P	+H	770.497	0.997034	0.723184	0.953651	0.68762
446	446-1	HMDB0034596	Hebevinoside VI	Lipids and lipid-like molecules	Steroids and steroid derivatives	Steroidal glycosides		C41H68O12	+NH4	770.505	0.996886	0.852283	0.868796	0.738154
446	446-2	HMDB0041465	Melilotoside B	Lipids and lipid-like molecules	Prenol lipids	Triterpenoids		C41H68O12	+NH4	770.505	0.996886	0.852283	0.868796	0.738154
447	447-1	HMDB0005780	PE(P-16:0/22:6)	Lipids and lipid-like molecules	Glycerophospholipids	Glycerophosphoethanolamines	C00350	C43H74NO7P	+Na	770.51	0.996749	0.850942	0.778667	0.660447
447	447-2	HMDB0009479	PE(20:5/P-18:1)	Lipids and lipid-like molecules	Glycerophospholipids	Glycerophosphoethanolamines		C43H74NO7P	+Na	770.51	0.996749	0.850942	0.778667	0.660447
447	447-3	HMDB0009708	PE(22:6/P-16:0)	Lipids and lipid-like molecules	Glycerophospholipids	Glycerophosphoethanolamines		C43H74NO7P	+Na	770.51	0.996749	0.850942	0.778667	0.660447
447	447-4	HMDB0011420	PE(P-18:1/20:5)	Lipids and lipid-like molecules	Glycerophospholipids	Glycerophosphoethanolamines		C43H74NO7P	+Na	770.51	0.996749	0.850942	0.778667	0.660447
448	448-1	HMDB0007872	PC(32:1)	Lipids and lipid-like molecules	Glycerophospholipids	Glycerophosphocholines		C40H78NO8P	+K	770.51	0.996788	0.850513	0.855961	0.725668
448	448-2	HMDB0008900	PE(35:1)	Lipids and lipid-like molecules	Glycerophospholipids	Glycerophosphoethanolamines		C40H78NO8P	+K	770.51	0.996788	0.850513	0.855961	0.725668
449	449-1	HMDB0009111	PE(40:8)	Lipids and lipid-like molecules	Glycerophospholipids	Glycerophosphoethanolamines		C45H74NO8P	-H2O+H	770.512	0.996881	0.864798	0.736701	0.635111
449	449-2	HMDB0114113	PE-NMe2(38:8)	Lipids and lipid-like molecules	Glycerophospholipids	Glycerophosphoethanolamines		C45H74NO8P	-H2O+H	770.512	0.996881	0.864798	0.736701	0.635111
450	450-1	HMDB0033621	Araliacerebroside	Lipids and lipid-like molecules	Sphingolipids	Glycosphingolipids		C40H77NO10	+K	770.518	0.996541	0.823527	0.624191	0.51226
451	451-1	HMDB0114893	PA(40:6)	Lipids and lipid-like molecules	Glycerophospholipids	Glycerophosphates		C43H73O8P	+Na	771.494	0.995756	0.621686	0.973381	0.602569
452	452-1	HMDB0115166	PA(42:9)	Lipids and lipid-like molecules	Glycerophospholipids	Glycerophosphates		C45H71O8P	+H	771.496	0.996471	0.569044	0.979016	0.555137
453	453-1	HMDB0014352	Azithromycin	Organic oxygen compounds	Organooxygen compounds	Carbohydrates and carbohydrate conjugates	C06838	C38H72N2O12	+Na	771.498	0.995878	0.598024	0.970431	0.577949
454	454-1	HMDB0030449	20-Deoxynarasin	Lipids and lipid-like molecules	Prenol lipids	Terpene glycosides		C43H72O10	+Na	771.502	0.995448	0.656984	0.955433	0.624846
455	455-1	HMDB0010573	PG(34:1)	Lipids and lipid-like molecules	Glycerophospholipids	Glycerophosphoglycerols		C40H77O10P	+Na	771.515	0.994976	0.845077	0.704889	0.592693
456	456-1	HMDB0010580	PG(36:4)	Lipids and lipid-like molecules	Glycerophospholipids	Glycerophosphoglycerols		C42H75O10P	+H	771.517	0.994382	0.786888	0.683932	0.535155
457	457-1	HMDB0114793	PA(38:0)	Lipids and lipid-like molecules	Glycerophospholipids	Glycerophosphates		C41H81O8P	+K	771.53	0.994935	0.723776	0.589251	0.424325
458	458-1	HMDB0112322	PS(33:0)	Lipids and lipid-like molecules	Glycerophospholipids	Glycerophosphoserines		C39H76NO10P	+Na	772.51	0.997168	0.656383	0.97852	0.640466
459	459-1	HMDB0112329	PS(35:3)	Lipids and lipid-like molecules	Glycerophospholipids	Glycerophosphoserines		C41H74NO10P	+H	772.512	0.996724	0.746556	0.947139	0.704775
460	460-1	HMDB0034994	Chikusetsusaponin Ia	Lipids and lipid-like molecules	Prenol lipids	Triterpenoids	C17544	C41H70O12	+NH4	772.521	0.99705	0.726914	0.949507	0.688174
460	460-2	HMDB0062593	Ginsenoside Mc	Lipids and lipid-like molecules	Prenol lipids	Terpene glycosides		C41H70O12	+NH4	772.521	0.99705	0.726914	0.949507	0.688174
461	461-1	HMDB0009413	PE(20:4/P-18:1)	Lipids and lipid-like molecules	Glycerophospholipids	Glycerophosphoethanolamines		C43H76NO7P	+Na	772.525	0.996642	0.757293	0.934813	0.705549
461	461-2	HMDB0009478	PE(20:5/P-18:0)	Lipids and lipid-like molecules	Glycerophospholipids	Glycerophosphoethanolamines		C43H76NO7P	+Na	772.525	0.996642	0.757293	0.934813	0.705549
461	461-3	HMDB0009642	PE(22:5/P-16:0)	Lipids and lipid-like molecules	Glycerophospholipids	Glycerophosphoethanolamines		C43H76NO7P	+Na	772.525	0.996642	0.757293	0.934813	0.705549
461	461-4	HMDB0011359	PE(P-16:0/22:5)	Lipids and lipid-like molecules	Glycerophospholipids	Glycerophosphoethanolamines		C43H76NO7P	+Na	772.525	0.996642	0.757293	0.934813	0.705549
461	461-5	HMDB0011387	PE(P-18:0/20:5)	Lipids and lipid-like molecules	Glycerophospholipids	Glycerophosphoethanolamines		C43H76NO7P	+Na	772.525	0.996642	0.757293	0.934813	0.705549
461	461-6	HMDB0011418	PE(P-18:1/20:4)	Lipids and lipid-like molecules	Glycerophospholipids	Glycerophosphoethanolamines		C43H76NO7P	+Na	772.525	0.996642	0.757293	0.934813	0.705549
462	462-1	HMDB0000564	PC(32:0)	Lipids and lipid-like molecules	Glycerophospholipids	Glycerophosphocholines	C00157	C40H80NO8P	+K	772.525	0.996584	0.73384	0.937715	0.685782
462	462-2	HMDB0008899	PE(35:0)	Lipids and lipid-like molecules	Glycerophospholipids	Glycerophosphoethanolamines		C40H80NO8P	+K	772.525	0.996584	0.73384	0.937715	0.685782
463	463-1	HMDB0009045	PE(40:7)	Lipids and lipid-like molecules	Glycerophospholipids	Glycerophosphoethanolamines		C45H76NO8P	-H2O+H	772.528	0.996647	0.747603	0.925418	0.689525
463	463-2	HMDB0113982	PE-NMe2(38:7)	Lipids and lipid-like molecules	Glycerophospholipids	Glycerophosphoethanolamines		C45H76NO8P	-H2O+H	772.528	0.996647	0.747603	0.925418	0.689525
464	464-1	HMDB0115140	PA(42:8)	Lipids and lipid-like molecules	Glycerophospholipids	Glycerophosphates		C45H73O8P	+H	773.512	0.995134	0.521205	0.952278	0.493917
465	465-1	HMDB0010572	PG(34:0)	Lipids and lipid-like molecules	Glycerophospholipids	Glycerophosphoglycerols		C40H79O10P	+Na	773.53	0.995462	0.530875	0.885812	0.468121
466	466-1	HMDB0010578	PG(36:3)	Lipids and lipid-like molecules	Glycerophospholipids	Glycerophosphoglycerols		C42H77O10P	+H	773.533	0.995193	0.532276	0.8771	0.464615
467	467-1	HMDB0007890	PC(36:5)	Lipids and lipid-like molecules	Glycerophospholipids	Glycerophosphocholines		C44H78NO8P	+H	780.554	0.994847	0.712754	0.79999	0.567258
467	467-2	HMDB0113056	PE-NMe(38:5)	Lipids and lipid-like molecules	Glycerophospholipids	Glycerophosphoethanolamines		C44H78NO8P	+H	780.554	0.994847	0.712754	0.79999	0.567258
467	467-3	HMDB0113935	PE-NMe2(37:5)	Lipids and lipid-like molecules	Glycerophospholipids	Glycerophosphoethanolamines		C44H78NO8P	+H	780.554	0.994847	0.712754	0.79999	0.567258
468	468-1	HMDB0008946	PE(38:6)	Lipids and lipid-like molecules	Glycerophospholipids	Glycerophosphoethanolamines		C43H74NO8P	+NH4	781.549	0.993919	0.685732	0.960846	0.654877
468	468-2	HMDB0113036	PE-NMe(37:6)	Lipids and lipid-like molecules	Glycerophospholipids	Glycerophosphoethanolamines		C43H74NO8P	+NH4	781.549	0.993919	0.685732	0.960846	0.654877
468	468-3	HMDB0113896	PE-NMe2(36:6)	Lipids and lipid-like molecules	Glycerophospholipids	Glycerophosphoethanolamines		C43H74NO8P	+NH4	781.549	0.993919	0.685732	0.960846	0.654877
469	469-1	HMDB0012356	PS(34:0)	Lipids and lipid-like molecules	Glycerophospholipids	Glycerophosphoserines		C40H78NO10P	+NH4	781.57	0.995878	0.602011	0.585465	0.351003
470	470-1	HMDB0114851	PA(40:1)	Lipids and lipid-like molecules	Glycerophospholipids	Glycerophosphates		C43H83O8P	+Na	781.572	0.99542	0.652012	0.59686	0.387377
471	471-1	HMDB0007879	PC(34:1)	Lipids and lipid-like molecules	Glycerophospholipids	Glycerophosphocholines	C00157	C42H82NO8P	+Na	782.567	0.996019	0.647854	0.94436	0.609372
472	472-1	HMDB0112328	PS(35:2)	Lipids and lipid-like molecules	Glycerophospholipids	Glycerophosphoserines		C41H76NO10P	+Na	796.51	0.996223	0.692926	0.96199	0.66407
473	473-1	HMDB0061474	PE(DiMe(11,3)/DiMe(9,3))	Lipids and lipid-like molecules	Glycerophospholipids	Glycerophosphoethanolamines		C43H74NO10P	+H	796.512	0.995696	0.747726	0.945325	0.703801
473	473-2	HMDB0061498	PE(DiMe(9,3)/DiMe(11,3))	Lipids and lipid-like molecules	Glycerophospholipids	Glycerophosphoethanolamines		C43H74NO10P	+H	796.512	0.995696	0.747726	0.945325	0.703801
473	473-3	HMDB0061502	PE(DiMe(9,3)/DiMe(9,5))	Lipids and lipid-like molecules	Glycerophospholipids	Glycerophosphoethanolamines		C43H74NO10P	+H	796.512	0.995696	0.747726	0.945325	0.703801
473	473-4	HMDB0061510	PE(DiMe(9,5)/DiMe(9,3))	Lipids and lipid-like molecules	Glycerophospholipids	Glycerophosphoethanolamines		C43H74NO10P	+H	796.512	0.995696	0.747726	0.945325	0.703801
473	473-5	HMDB0061521	PE(MonoMe(11,3)/MonoMe(11,3))	Lipids and lipid-like molecules	Glycerophospholipids	Glycerophosphoethanolamines		C43H74NO10P	+H	796.512	0.995696	0.747726	0.945325	0.703801
473	473-6	HMDB0061524	PE(MonoMe(11,3)/MonoMe(9,5))	Lipids and lipid-like molecules	Glycerophospholipids	Glycerophosphoethanolamines		C43H74NO10P	+H	796.512	0.995696	0.747726	0.945325	0.703801
473	473-7	HMDB0061548	PE(MonoMe(9,5)/MonoMe(11,3))	Lipids and lipid-like molecules	Glycerophospholipids	Glycerophosphoethanolamines		C43H74NO10P	+H	796.512	0.995696	0.747726	0.945325	0.703801
473	473-8	HMDB0061551	PE(MonoMe(9,5)/MonoMe(9,5))	Lipids and lipid-like molecules	Glycerophospholipids	Glycerophosphoethanolamines		C43H74NO10P	+H	796.512	0.995696	0.747726	0.945325	0.703801
474	474-1	HMDB0009710	PE(22:6/P-18:1)	Lipids and lipid-like molecules	Glycerophospholipids	Glycerophosphoethanolamines		C45H76NO7P	+Na	796.525	0.995981	0.800261	0.872073	0.695082
474	474-2	HMDB0011427	PE(P-18:1/22:6)	Lipids and lipid-like molecules	Glycerophospholipids	Glycerophosphoethanolamines		C45H76NO7P	+Na	796.525	0.995981	0.800261	0.872073	0.695082
475	475-1	HMDB0007880	PC(34:2)	Lipids and lipid-like molecules	Glycerophospholipids	Glycerophosphocholines	C00157	C42H80NO8P	+K	796.525	0.995878	0.78778	0.90341	0.708755
475	475-2	HMDB0008909	PE(37:2)	Lipids and lipid-like molecules	Glycerophospholipids	Glycerophosphoethanolamines		C42H80NO8P	+K	796.525	0.995878	0.78778	0.90341	0.708755
476	476-1	HMDB0009342	PE(42:9)	Lipids and lipid-like molecules	Glycerophospholipids	Glycerophosphoethanolamines		C47H76NO8P	-H2O+H	796.528	0.995933	0.798532	0.846051	0.672851
477	477-1	HMDB0115346	PA(44:10)	Lipids and lipid-like molecules	Glycerophospholipids	Glycerophosphates		C47H73O8P	+H	797.512	0.995334	0.52065	0.894567	0.463583
478	478-1	HMDB0010605	PG(36:2)	Lipids and lipid-like molecules	Glycerophospholipids	Glycerophosphoglycerols		C42H79O10P	+Na	797.53	0.994354	0.786839	0.815398	0.637964
479	479-1	HMDB0010582	PG(38:5)	Lipids and lipid-like molecules	Glycerophospholipids	Glycerophosphoglycerols		C44H77O10P	+H	797.533	0.993111	0.743273	0.790778	0.583715
480	480-1	HMDB0112285	PS(35:1)	Lipids and lipid-like molecules	Glycerophospholipids	Glycerophosphoserines		C41H78NO10P	+Na	798.526	0.994996	0.561585	0.942746	0.526783
481	481-1	HMDB0009709	PE(22:6/P-18:0)	Lipids and lipid-like molecules	Glycerophospholipids	Glycerophosphoethanolamines		C45H78NO7P	+Na	798.541	0.995649	0.63937	0.918645	0.584799
481	481-2	HMDB0011394	PE(P-18:0/22:6)	Lipids and lipid-like molecules	Glycerophospholipids	Glycerophosphoethanolamines		C45H78NO7P	+Na	798.541	0.995649	0.63937	0.918645	0.584799
482	482-1	HMDB0009309	PE(42:8)	Lipids and lipid-like molecules	Glycerophospholipids	Glycerophosphoethanolamines		C47H78NO8P	-H2O+H	798.543	0.995291	0.640319	0.908412	0.578934
482	482-2	HMDB0113877	PE-NMe2(40:8)	Lipids and lipid-like molecules	Glycerophospholipids	Glycerophosphoethanolamines		C47H78NO8P	-H2O+H	798.543	0.995291	0.640319	0.908412	0.578934
483	483-1	HMDB0007921	PC(36:3)	Lipids and lipid-like molecules	Glycerophospholipids	Glycerophosphocholines		C44H82NO8P	+Na	806.567	0.99348	0.550012	0.829297	0.453149
484	484-1	HMDB0112336	PS(37:4)	Lipids and lipid-like molecules	Glycerophospholipids	Glycerophosphoserines		C43H76NO10P	+Na	820.51	0.994185	0.57417	0.912017	0.520607
485	485-1	HMDB0013472	PGP(32:0)	Lipids and lipid-like molecules	Glycerophospholipids	Glycerophosphoglycerophosphates		C38H76O13P2	+NH4	820.51	0.994164	0.589361	0.93687	0.548932
486	486-1	HMDB0007889	PC(36:4)	Lipids and lipid-like molecules	Glycerophospholipids	Glycerophosphocholines		C44H80NO8P	+K	820.525	0.993117	0.662593	0.921508	0.606383
486	486-2	HMDB0113055	PE-NMe(38:4)	Lipids and lipid-like molecules	Glycerophospholipids	Glycerophosphoethanolamines		C44H80NO8P	+K	820.525	0.993117	0.662593	0.921508	0.606383
486	486-3	HMDB0113934	PE-NMe2(37:4)	Lipids and lipid-like molecules	Glycerophospholipids	Glycerophosphoethanolamines		C44H80NO8P	+K	820.525	0.993117	0.662593	0.921508	0.606383
487	487-1	HMDB0009639	PE(44:11)	Lipids and lipid-like molecules	Glycerophospholipids	Glycerophosphoethanolamines		C49H76NO8P	-H2O+H	820.528	0.993678	0.682945	0.906879	0.615433
488	488-1	HMDB0013477	PGP(34:2)	Lipids and lipid-like molecules	Glycerophospholipids	Glycerophosphoglycerophosphates		C40H76O13P2	+NH4	844.51	0.993846	0.631344	0.978135	0.613739
489	489-1	HMDB0004866	LacCer(d30:1)					C42H79NO13	+K	844.518	0.994388	0.63824	0.943292	0.598668
490	490-1	HMDB0007991	PC(38:6)	Lipids and lipid-like molecules	Glycerophospholipids	Glycerophosphocholines		C46H80NO8P	+K	844.525	0.994226	0.671581	0.935495	0.624633
490	490-2	HMDB0113107	PE-NMe(40:6)	Lipids and lipid-like molecules	Glycerophospholipids	Glycerophosphoethanolamines		C46H80NO8P	+K	844.525	0.994226	0.671581	0.935495	0.624633
