# Supplementary material for: Spatial Resolved Metabolomics via AFADESI-MSI Reveals Lipid Metabolic Alterations in Aging Lungs
Source: Research Square preprint supplement (doi:10.21203/rs.3.rs-7113832/v1), 2025-07-28
Supplement: Supplementary file 6 [file eb2f14641bbebd1324788e87.docx]

**Supplemental materials**

**Spatial Metabolomic Remodeling of Lipid Pathways Drives Inflammaging in Aging Lungs**

Lifeng Yan1#, Xiahui Ge1#, Huaqi Guo1, Yu Xie1, Weining Xiong1,2, Lijun Zhu3,4*, Tianyu Zhou1,2*

1. Department of Respiratory and Critical Care, Shanghai Ninth People's Hospital, Shanghai Jiao Tong University School of Medicine, Shanghai, 200011, China

2. Shanghai Key Laboratory of Tissue Engineering, Shanghai Ninth People's Hospital, Shanghai Jiao Tong University School of Medicine, Shanghai, 200011, China

3. Department of Geriatrics, The First Affiliated Hospital, Zhejiang University School of Medicine, Hangzhou, 310003, China

4. Zhejiang Provincial Key Laboratory for Diagnosis and Treatment of Aging and Physic-chemical Injury Diseases, The First Affiliated Hospital, Zhejiang University School of Medicine, Hangzhou, 310003, China

# These authors contributed equally to this study.

*Corresponding author(s):

Lijun Zhu (zhulijun@zju.edu.cn)

Tianyu Zhou (zty2712@hotmail.com)

**Methods**

**1. Histopathological analysis of lung sections**

After being embedded in 4% paraformaldehyde, the samples were sectioned into 5 μm thick slides and stained with hematoxylin and eosin for histological analysis. Emphysematous lesions were quantified via the mean alveolar area (MAA), mean alveolar diameter (MAD), and mean linear intercepts (MLI) via *Image-Pro Plus 6.0*. As previously described1. the same-sized images (200 × 200 μm) of alveoli were captured randomly under a microscope (scale bar = 50 μm). The MLI was calculated as the total length (L) of grid lines divided by the number of alveolar intercepts (NAI), whereas the MAA was determined by dividing airspace surfaces (S) by the number of alveoli (NA). The formulas used were: MLI=L÷NAI and MAA=S÷NA.

**2. Quantitative assessment of mRNA**

Total RNA was isolated from lung tissues via TRIzol® Reagent (#15596026, *Invitrogen™*, Thermo Fisher Scientific). For mRNA analysis, 0.8 µg of total RNA quantified via a Nanodrop 2000 (Thermo Fisher Scientific) was reverse transcribed into 20 μL of complementary DNA via the *PrimeScript*TM RT reagent Kit with gDNA Eraser (#RR047A, TaKaRa). Quantitative real-time PCR (qRT‒PCR) was performed on a QuantStudio6 FLEX Q6 (*Applied BiosystemsTM*, Thermo Fisher Scientific) in a 20 μL reaction that contained 1 μL of cDNA and *Power* SYBR® Green PCR Master Mix (#4368577, Applied BiosystemsTM, Thermo Fisher Scientific). The primers for the mRNAs were synthesized by Sangon Biotech (Shanghai) Co., Ltd., and the sequences were shown as follow:

*Actb* forward 5’-TGACGTTGACATCCGTAAAGACC-3’, *reverse* 5’-CTCAGGAGGAGCAATGATCTTGA-3’;

*Cdkn2a/p16* forward 5’-GCTCAACTACGGTGCAGATTC-3’, reverse 5’-GCACGATGTCTTGATGTCCC-3’;

Cdkn1d/p19 forward 5’-CTGAACCGCTTTGGCAAGAC-3’, reverse 5’-GCCCTCTCTTATCGCCAGAT-3’;

*Cdkn1a/p21* forward5’-CCTGGTGATGTCCGACCTG-3’, reverse 5’-CCATGAGCGCATCGCAATC-3’;

*Trp53* forward 5’-CATCACCTCACTGCATGGAC-3’, reverse 5’-TGAGGGGAGGAGAGTACGTG-3’;

*Pla2* forward 5’-CTATGCCTTCTATGGATGCCAC-3’, reverse 5’-CAGCCGTTTCTGACAGGAGT-3’;

*Fabp6* forward 5’-CTTCCAGGAGACGTGATTGAAA-3’; reverse 5’-AACTTGTTGCTCATAATGTTGCC-3’;

*Lta4h* forward 5’-ACTCTGGTGTGGTCCGAGAAAG-3’, reverse5’- GGCAGAACCAAGAGGTCGTACT-3’;

*Ptgr1* forward 5’-GACAAAGCTGCCTGTAGAGTGG-3’,reverse5’-GCTGACCATCACGGTTTCTCCA-3’;

*Elovl2* forward 5’-CACGTACCTGCTCTCGATATGG-3’, reverse 5’-TGTGATTGCGAGGTTATACAAGG-3’.

**3. AFADESI-MSI**

The superior lobe of the right lung from 3 young and 3 old mice was embedded in OCT and sectioned at a thickness of 10 μm via a Leica CM1950 cryostat (Leica Microsystem Ltd., Germany) at -20°C. Before AFADESI-MSI analysis, the microscope slides were dried in a vacuum desiccator for approximately 30 min. AFADESI–MSI analysis was conducted by Shanghai Lu-Ming Biotech Co. Ltd. (Shanghai, China). Briefly, MSI experiments were performed on an AFADESI-MSI platform equipped with a Q-Orbitrap mass spectrometer (Thermo Fisher Scientific, USA) and an AFADESI ambient ion source (Viktor Ltd., China). The lung tissue sections were continuously scanned at a constant rate of 200 μm/s in the x-direction and separated by a 100 μm step in the y-direction. The mass spectra were acquired in full MS mode, with a scan range of 100–1000 Da and a mass resolution of 70,000. The spray voltage was ±7 kV, and the capillary temperature was 350°C. Nitrogen (0.6 MPa) was used as the spray gas, and a mixture of acetonitrile/water (80:20, v/v, 5 µL/min) was used as the spray solvent. The extracting gas flow rate was set at 45 L/min. The data were acquired with Xcalibur software 3.0 (Thermo Fisher Scientific).

In the acquired Xcalibur data, the exact masses of the molecules and product ions can be matched with literature data, the in-house database smetDB (<https://funmeta.oebiotech.com>) built by Shanghai Luming Biotechnology Co., Ltd., and the online public database pySM (<https://github.com/alexandrovteam/pySM>)2 with a mass accuracy of less than 5 ppm to tentatively assign the postulated structures of the discriminating metabolites. The metabolites were subsequently subjected to high-resolution tandem MS directly from tissue sections. The considered ion adduct types included [M-H]−, [M-H2O-H]−, [M+Cl]−, [M+HCOO]−, [M+H]+, [M+NH4]+, [M-H2O+H]+, [M+Na]+, and [M+K]+. Those signals tentatively identified with one unique molecular identity assignment in at least 1 database were used in further analysis.

The collected raw files were converted into .imzML format by via imzMLConverter software3 and then imported into custom-developed imaging software (Cardinal R) for ion image reconstruction, background subtraction, peak picking, peak alignment, and multivariate statistical analysis. After background subtraction, AFADESI-MS profiles from regions of interest (ROIs) were extracted by matching high-spatial resolution H&E images, generating separate two-dimensional data matrixes (m/z, intensity) in .txt format. The eventual images were obtained after normalized to the total ion current (TIC) value of the sample. The relative intensities of ions from the lungs of young and old mice were subjected to supervised multivariate orthogonal partial least squares-discriminant analysis (OPLS-DA) to determine the discriminating endogenous metabolites associated with lung aging. The significantly discriminant m/z features were screened by constructing MS images of the ions with large classification loading values. Variable Importance of Projection (VIP) values obtained from the OPLS-DA model were used to rank the overall contribution of each variable to group discrimination. Differential metabolites were selected with VIP value ≥1.0 and *P* value < 0.05.

**4. Untargeted LC-MS/MS metabolomics analysis**

For the LC-MS/MS analysis, five biological replicates from both the 3-month-old and 24-month-old groups were analyzed. A Dionex Ultimate 3000 RS UHPLC system coupled with a Q-Exactive Plus Quadrupole-Orbitrap mass spectrometer equipped with a heated electrospray ionization (ESI) source (Thermo Fisher Scientific) was employed for metabolic profiling. Unsupervised principal component analysis (PCA) and partial least squares discriminant analysis (PLS-DA) were utilized to assess the stability of the assay and to identify metabolites that differed between the groups. The significance of differences in metabolite levels between groups was confirmed via Student's t-tests. Differential metabolites were selected based on variable importance in projection (VIP) values greater than 1.0 and p values less than 0.05. The metabolomic sequencing and analysis were performed by Shanghai Lu-Ming Biotech Co. Ltd. (Shanghai, China).

1. Sun C, Li T, Song X, et al. Spatially resolved metabolomics to discover tumor-associated metabolic alterations. Proc Natl Acad Sci U S A 2019;116:52-7.

2. Palmer A, Phapale P, Chernyavsky I, et al. FDR-controlled metabolite annotation for high-resolution imaging mass spectrometry. Nat Methods 2017;14:57-60.

3. Schramm T, Hester Z, Klinkert I, et al. imzML--a common data format for the flexible exchange and processing of mass spectrometry imaging data. J Proteomics 2012;75:5106-10.

**Figures**


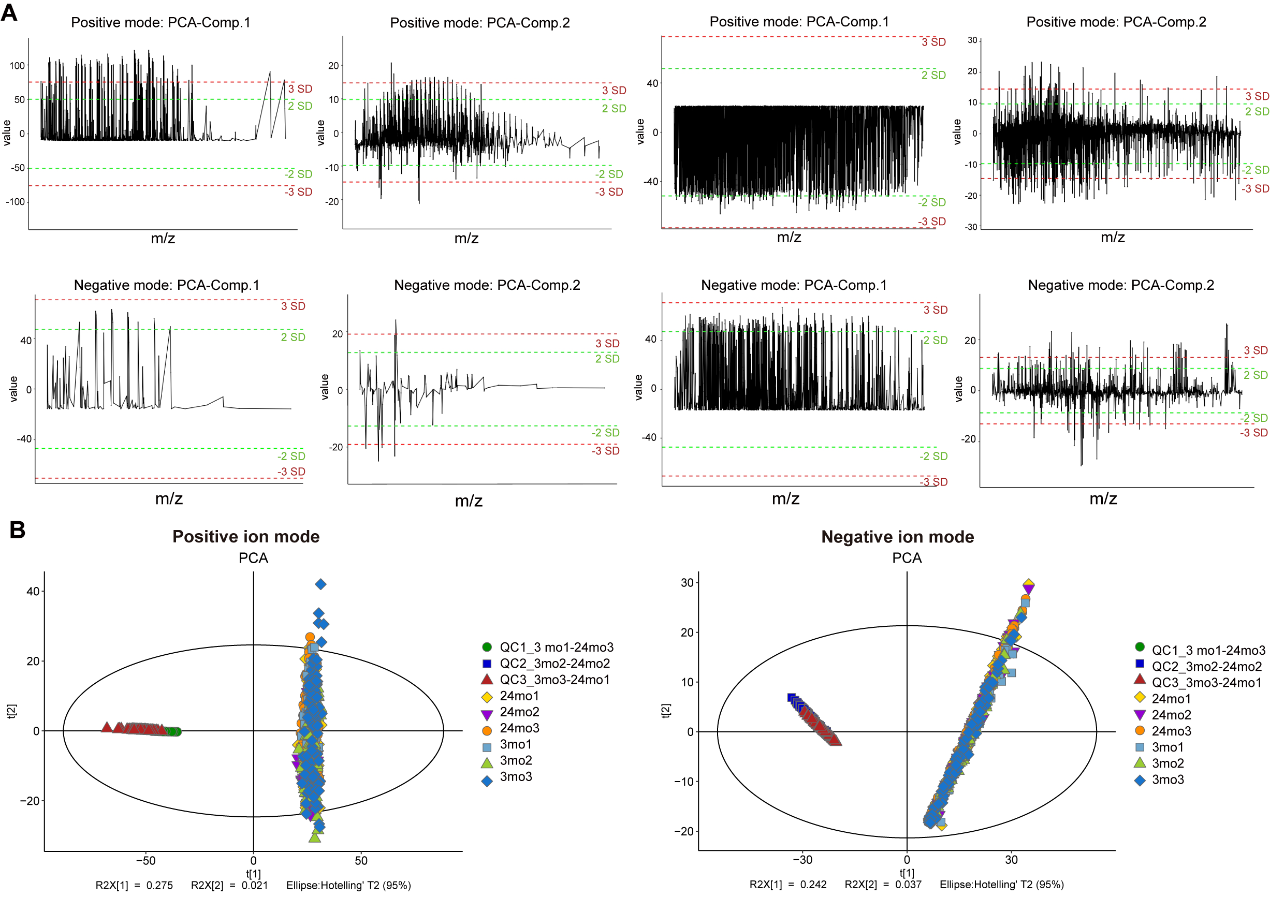
**Figure S1.** **Quality control data.** (A‒H) The deviation in the AFADESI-MSI analysis was evaluated by the distribution of the runs. Line plots of the data extracted from a blank area generated via PCA using components 1 and 2 show the stability of the AFAI-MSI system. Line plots depicting the first and second components of positive ion mode MSIs acquired from masses > 500 Da (A, B) and ≤ 500 Da (C, D) and negative ion mode MSIs acquired from masses > 500 Da (F, G) and ≤ 500 Da (H, I). X-axis: run order; Y-axis: standard deviation. (I) PCA of quality control samples in positive and negative ion mode. QC: quality control samples; PCA: principal component analysis. The values are shown as the means ± SDs. n = 3‒4 for each independent group. * *p* < 0.05, ** *p* < 0.01.


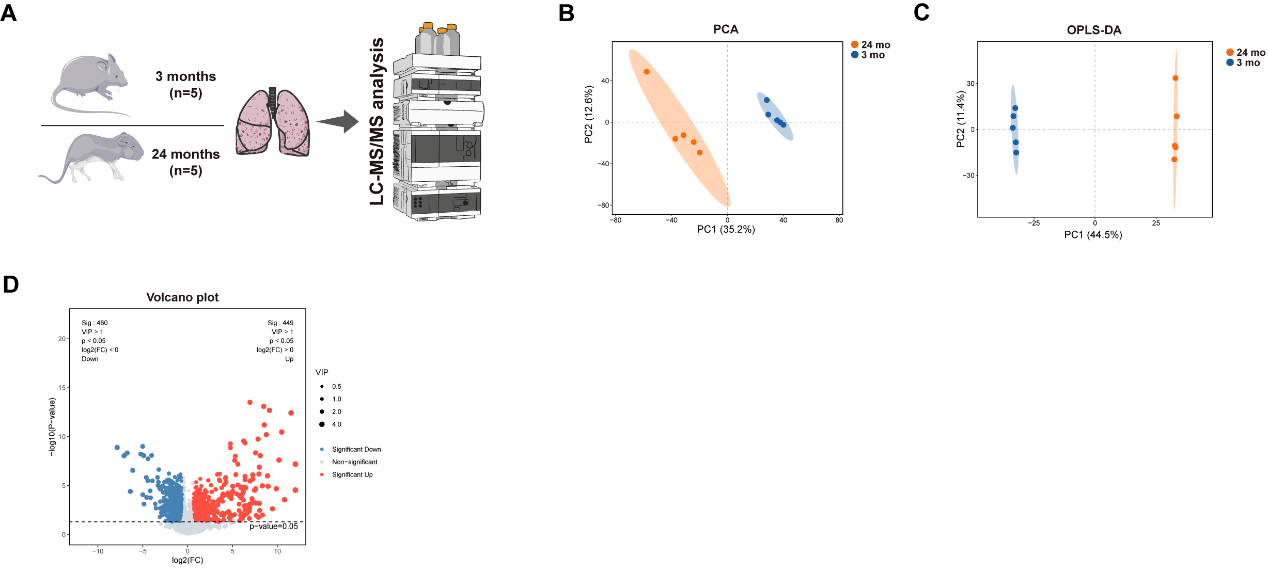


**Figure S2. LC-MS/MS analysis of lungs.** (A) Flow chart of LC-MS/MS analysis of lungs. (B) PCA of the LC-MS/MS data. (C) Score scatter plots for OPLS−DA.
